# Supplementary material for: Rhizobium Impacts on Seed Productivity, Quality, and Protection of Pisum sativum upon Disease Stress Caused by Didymella pinodes: Phenotypic, Proteomic, and Metabolomic Traits
Source: Front Plant Sci. 2017 Nov 15;8:1961. doi: 10.3389/fpls.2017.01961 (PMC5699443; doi:10.3389/fpls.2017.01961)
Supplement: Supplementary file 2 [file Table_5.XLSX]

## Sheet: Table S5
Table S5 Proteomics data statistical overview; average LFQ ratios, ANOVA p- and q-values; Me = cv. Messire, Pr = cv. Protecta; I = pathogen infected; U = uninfected; R = Rhizobial inoculated; NR non-Rhizobial inoculation; p-val<0.05 green; ratios >2 red; ratios < 2 yellow
Major ID	Protein Group	Description	MapMan - functional category	HEATMAP_clusterID	MeRI vs MeI	p	q	MeRU vs MeU	p	q	MeRI vs MeRU	p	q	MeI vs MeU	p	q	PrRI vs PrI	p	q	PrRU vs PrU	p	q	PrI vs PrU	p	q	PrRI vs PrRU	p	q	Unique Protein
>generic|frv2_43883|franssen_26961_5	frv2_43883;frv2_42385;frv2_38685;frv2_42694;frv2_42303;frv2_69190;frv2_80545;frv2_72517;frv2_43415;frv2_39798;frv2_42943;frv2_70506;frv2_73486;frv2_42313;frv2_44281;frv2_69194	franssen_26961_5 Plastocyanin, chloroplastic n=1 Tax=Pisum sativum RepID=PLAS_PEA (UniRef100_P16002 icov:80% qcovs:96.72% e-val:9e-34)	PS.lightreaction.other electron carrier (ox/red).plastocyanin	1	0.720072	0.0314928	0.0341382	3.87826	0.048906	0.107271	0.451424	0.0158742	0.0422906	0.636279	0.126566	0.0945807	1.42035	0.0334067	0.272713	0.365405	0.378137	0.593758	1.33911	0.592614	0.59255	3.3847	0.0909824	0.0557782
>generic|frv2_77583|Pisum_sativum_v2_Contig2563_2	frv2_77583;frv2_45495	Pisum_sativum_v2_Contig2563_2 ATP synthase subunit delta, mitochondrial n=1 Tax=Pisum sativum RepID=ATP4_PEA (UniRef100_Q41000 icov:86% qcovs:97.46% e-val:3e-133)	mitochondrial electron transport / ATP synthesis.F1-ATPase	1	1.77085	0.0111695	0.018422	4.23237	0.0168723	0.0569763	0.545711	0.0514852	0.0914413	1.15056	0.431826	0.206134	1.07055	0.760379	0.64158	0.147941	0.195155	0.593758	0.952693	0.280729	0.560593	2.0032	0.109198	0.0600772
>generic|frv2_78740|Pisum_sativum_v2_Contig3264_4	frv2_78740;frv2_47678	Pisum_sativum_v2_Contig3264_4 PREDICTED: phosphoribulokinase, chloroplastic-like n=1 Tax=Cicer arietinum RepID=UPI00032AC78E (UniRef100_UPI00032AC78E icov:97% qcovs:93.45% e-val:0)	PS.calvin cycle.PRK	1	0.369834	5.82218e-05	0.00178608	3.531	0.0420069	0.0958961	0.619401	0.0252348	0.0573995	0.651612	0.258736	0.141852	1.158	0.437398	0.553218	1.03229	0.972128	0.720682	0.785237	0.569184	0.589252	1.57501	0.770911	0.209106
>generic|frv2_87807|Pisum_sativum_v2_Contig7875_5	frv2_87807;frv2_50274	Pisum_sativum_v2_Contig7875_5 Emp24/gp25L/p24 family protein n=2 Tax=Medicago truncatula RepID=G7K0K7_MEDTR (UniRef100_G7K0K7 icov:98% qcovs:90.09% e-val:9e-135)	protein.targeting.secretory pathway.unspecified	1	0.372486	0.00974266	0.0168857	2.52594	0.0240718	0.0711003	0.90116	0.0029799	0.0150527	0.647888	0.98467	0.352907	1.11076	0.600125	0.605821	0.542925	0.563788	0.618661	0.679269	0.876862	0.682485	0.912077	0.228501	0.0885426
>generic|frv2_83447|Pisum_sativum_v2_Contig5697_3	frv2_83447;Q42593;frv2_7907	Pisum_sativum_v2_Contig5697_3 PREDICTED: L-ascorbate peroxidase S, chloroplastic/mitochondrial-like isoform X2 n=1 Tax=Cicer arietinum RepID=UPI00032A76FB (UniRef100_UPI00032A76FB icov:97% qcovs:92.19% e-val:0)	redox.ascorbate and glutathione.ascorbate	1	0.554479	0.00712299	0.0141549	2.31909	0.0420516	0.0958961	0.991292	0.0144594	0.0410301	1.11647	0.175013	0.11048	0.917588	0.71924	0.628803	0.294144	0.197548	0.593758	0.527966	0.287586	0.560593	0.74751	0.457778	0.142381
>generic|frv2_77791|Pisum_sativum_v2_Contig2686_5	frv2_77791;Q43636	Pisum_sativum_v2_Contig2686_5 Thioredoxin h n=1 Tax=Pisum sativum RepID=Q9AR82_PEA (UniRef100_Q9AR82 icov:95% qcovs:100% e-val:9e-82)	redox.thioredoxin	1	0.607434	0.00218659	0.0097413	2.10659	0.105758	0.16415	0.561151	0.0481456	0.0871009	0.715014	0.0448636	0.0515758	2.08396	0.00820248	0.162328	0.883482	0.813708	0.677343	1.24983	0.158249	0.48784	2.40535	0.158421	0.0719468
>generic|frv2_86521|Pisum_sativum_v2_Contig7237_1	frv2_86521;frv2_49678	Pisum_sativum_v2_Contig7237_1 4-hydroxy-4-methyl-2-oxoglutarate aldolase n=1 Tax=Medicago truncatula RepID=B7FGQ6_MEDTR (UniRef100_B7FGQ6 icov:100% qcovs:98.19% e-val:4e-113)	C1-metabolism	1	0.328369	1.61383e-05	0.000990155	3.27933	0.355436	0.286797	0.146716	0.181572	0.195094	0.990386	0.180722	0.111812	1.36444	0.43366	0.552428	0.31565	0.000139765	0.0923264	2.57398	0.0107657	0.185468	1.2534	0.116281	0.0618412
>generic|frv2_81146|Pisum_sativum_v2_Contig4551_1	frv2_81146	Pisum_sativum_v2_Contig4551_1 Serine/threonine protein phosphatase 2A regulatory subunit A n=1 Tax=Medicago truncatula RepID=A0A072W1U6_MEDTR (UniRef100_A0A072W1U6 icov:97% qcovs:98.81% e-val:0)	protein.postranslational modification	1	0.489248	0.0290051	0.0324445	1.7422	0.305872	0.272049	6.39889	0.302746	0.251223	1.21781	0.0166088	0.028168	1.37926	0.0444632	0.3073	0.985053	0.985896	0.722025	2.88654	0.273085	0.560593	0.910566	0.133299	0.0668703	X
>generic|frv2_49499|franssen_30453_3	frv2_49499;frv2_6410;frv2_6411	franssen_30453_3 Uncharacterized protein n=7 Tax=rosids RepID=I1JGK4_SOYBN (UniRef100_I1JGK4 icov:99% qcovs:98.63% e-val:7e-104)	protein.degradation.ubiquitin.E2	1	1.44197	0.00311209	0.0107414	1.04949	0.795185	0.372901	0.648661	0.891527	0.388753	1.31291	0.0138071	0.0250669	1.11653	0.659876	0.613885	0.282512	0.0382253	0.593758	2.0888	0.451438	0.563553	1.95812	0.0291884	0.0318169
>generic|frv2_16133|franssen_9488_6	frv2_16133;frv2_75267;frv2_59733	franssen_9488_6 60S acidic ribosomal protein n=1 Tax=Medicago truncatula RepID=A0A072VLF0_MEDTR (UniRef100_A0A072VLF0 icov:82% qcovs:91.3% e-val:1e-40)	protein.synthesis.ribosomal protein.eukaryotic.60S subunit.P2	1	0.742287	0.0260118	0.0306482	0.575634	0.44395	0.30181	1.07755	0.233246	0.224643	0.747668	0.601162	0.259052	1.11981	0.49354	0.563493	0.296853	0.0174143	0.593758	0.879905	0.0925778	0.415986	1.73706	0.0202773	0.0276177
>generic|frv2_49123|franssen_30201_4	frv2_49123;frv2_118365;Q8VZW3	franssen_30201_4 Chalcone-flavonone isomerase family protein n=1 Tax=Medicago truncatula RepID=I3S971_MEDTR (UniRef100_I3S971 icov:89% qcovs:93.3% e-val:2e-126)	secondary metabolism.flavonoids.chalcones	1	0.783717	0.0308792	0.0337112	2.65371	0.0774766	0.138129	2.13125	0.0102369	0.0330935	0.832882	0.219042	0.126344	1.09785	0.363595	0.52509	0.312365	0.0140549	0.593758	1.48479	0.0478	0.335707	2.15955	0.0323967	0.0335876
>generic|frv2_84713|Pisum_sativum_v2_Contig6332_4	frv2_84713	Pisum_sativum_v2_Contig6332_4 Thylakoid lumenal 29.8 kDa protein n=1 Tax=Medicago truncatula RepID=G7J5M2_MEDTR (UniRef100_G7J5M2 icov:90% qcovs:88.85% e-val:9e-167)	PS.lightreaction.photosystem II.PSII polypeptide subunits	1	3.11692	0.00784378	0.0148737	4.91246	0.42078	0.298912	0.725261	0.43463	0.2785	0.785048	0.0244175	0.034705	2.99951	0.255359	0.486204	0.0461722	0.300944	0.593758	0.773834	0.300944	0.560593	0.578724	0.255359	0.0953084	X
>generic|frv2_76239|Pisum_sativum_v2_Contig1712_5	frv2_76239;Q8LBU2;frv2_50366;frv2_76241;frv2_87653	Pisum_sativum_v2_Contig1712_5 Glutathione peroxidase n=1 Tax=Cicer arietinum RepID=U5NF47_CICAR (UniRef100_U5NF47 icov:90% qcovs:91.76% e-val:7e-111)	redox.ascorbate and glutathione.glutathione	1	5.26614	0.00140938	0.00831458	3.43983	0.428505	0.298912	0.257108	0.52971	0.299546	0.369855	0.00734423	0.0183461	0.898771	0.82557	0.663987	0.130199	0.373901	0.593758	0.303003	0.420654	0.560593	0.491162	0.142167	0.0690919
>generic|frv2_89610|Pisum_sativum_v2_Contig8787_6	frv2_89610	Pisum_sativum_v2_Contig8787_6 PREDICTED: uncharacterized protein LOC101495679 n=1 Tax=Cicer arietinum RepID=UPI00032A7045 (UniRef100_UPI00032A7045 icov:90% qcovs:80.9% e-val:9e-150)	protein.targeting.mitochondria	1	2.50529	0.00290748	0.0107414	2.54377	0.695491	0.344163	2.1427	0.62618	0.32235	1.81812	0.00960099	0.0210128	1	nan	nan	1	nan	nan	0.336517	0	0	0.402697	0	0	X
>generic|frv2_52032|franssen_32214_4	frv2_52032;frv2_117615;Q9FJX3	franssen_32214_4 Porin/voltage-dependent anion-selective channel protein n=1 Tax=Medicago truncatula RepID=G7K2J4_MEDTR (UniRef100_G7K2J4 icov:97% qcovs:86.4% e-val:6e-150)	transport.porins	1	2.96867	0.000154116	0.0031519	2.2028	0.186661	0.223773	0.0324563	0.197284	0.206278	0.404531	0.00159355	0.0102286	1	nan	nan	0.616909	0.612027	0.621285	0.0511585	0.325735	0.560593	0.279972	0.373901	0.123347
>generic|frv2_117002|p.sativum_wa1_contig23080_3	frv2_117002;frv2_50546;Q9SW00	p.sativum_wa1_contig23080_3 OSBP(Oxysterol-binding protein)-related protein 4C n=1 Tax=Medicago truncatula RepID=G7JUB3_MEDTR (UniRef100_G7JUB3 icov:95% qcovs:89.23% e-val:0)	cell.vesicle transport	1	2.82832	0.0403119	0.0400547	1.64885	0.620702	0.337849	0.26052	0.84697	0.380852	0.571485	0.550407	0.244474	0.824544	0.290218	0.496739	1	nan	nan	1.37064	0.00697531	0.143846	1.54763	0.000795198	0.00475631
>generic|frv2_81222|Pisum_sativum_v2_Contig4589_1	frv2_81222;frv2_54563	Pisum_sativum_v2_Contig4589_1 FAD-dependent pyridine nucleotide-disulphide oxidoreductase	mitochondrial electron transport / ATP synthesis.NADH-DH.type II.external	1	3.0614	0.000964926	0.00796634	1.43166	0.356579	0.286797	0.642832	0.570121	0.306724	0.875366	0.00115454	0.00887782	0.986179	0.928116	0.689397	0.101151	0.255898	0.593758	0.6977	0.40151	0.560593	3.43506	0.00147014	0.0068588
>generic|frv2_47306|franssen_28999_1	frv2_47306;Q8H124	franssen_28999_1 NAD-dependent epimerase/dehydratase family protein n=2 Tax=Medicago truncatula RepID=G7JFG1_MEDTR (UniRef100_G7JFG1 icov:100% qcovs:90.54% e-val:0)	not assigned.no ontology	1	2.18298	0.00699223	0.0141549	0.485387	0.942712	0.408937	0.719532	0.237278	0.227319	0.84035	0.0394893	0.0468566	1.01277	0.940916	0.692282	0.675609	0.406924	0.597213	1.22937	0.593542	0.59255	2.7878	0.0449689	0.0406587
>generic|frv2_55043|franssen_34211_2	frv2_55043	franssen_34211_2 PREDICTED: ras GTPase-activating protein-binding protein 2-like n=1 Tax=Cicer arietinum RepID=UPI00032AB35E (UniRef100_UPI00032AB35E icov:99% qcovs:82.23% e-val:0)	protein.targeting.nucleus	1	2.06884	0.0255541	0.0306482	1.27674	0.426932	0.298912	118.794	0.450839	0.281549	1.04206	0.0287707	0.0381376	1.07918	0.134026	0.422845	0.6937	0.373901	0.593758	1.59828	0.022517	0.258476	54.359	1.98075e-07	2.31026e-05	X
>generic|frv2_98925|p.sativum_wa1_contig07124_6	frv2_98925;frv2_76783;frv2_57334	p.sativum_wa1_contig07124_6 PREDICTED: tropomyosin-2-like n=1 Tax=Cicer arietinum RepID=UPI00032AC6A2 (UniRef100_UPI00032AC6A2 icov:86% qcovs:86.08% e-val:0)	DNA.repair	1	0.444732	0.0237874	0.0297849	3.76491	0.257103	0.253688	0.131253	0.257103	0.236973	0.398431	0.0237874	0.0342379	0.940481	0.655947	0.613885	0.454756	0.216088	0.593758	0.526235	0.812418	0.661983	0.580525	0.0520057	0.0427162
>generic|carvalho17303|PsCam022612_1_AA	Q93Z16	PsCam022612_1_AA Dolichyl-diphosphooligosaccharide--protein glycosyltransferase subunit 2 OS=Arabidopsis thaliana GN=RPN2 PE=2 SV=1 (sp	development.unspecified	1	0.258019	0.000643638	0.0071567	2.80549	0.148971	0.196539	6.92891	0.0561412	0.0983632	1.24514	0.616738	0.263034	1.13506	0.322032	0.501591	0.243074	0.236094	0.593758	3.12909	0.560567	0.589252	5.69772	0.000191056	0.00226878	X
>generic|frv2_80400|Pisum_sativum_v2_Contig4169_4	frv2_80400;Q9SJ12	Pisum_sativum_v2_Contig4169_4 ATP synthase n=1 Tax=Medicago truncatula RepID=B7FH20_MEDTR (UniRef100_B7FH20 icov:90% qcovs:84.02% e-val:7e-139)	not assigned.unknown	1	0.395839	0.00315127	0.0107414	2.78474	0.0677454	0.128292	6.2711	0.0323938	0.067379	1.52448	0.14448	0.100004	1.15958	0.376192	0.527761	0.145725	0.201691	0.593758	1.6518	0.394694	0.560593	15.9637	0.010731	0.0201874
>generic|frv2_84514|Pisum_sativum_v2_Contig6233_2	frv2_84514	Pisum_sativum_v2_Contig6233_2 PREDICTED: asparagine synthetase [glutamine-hydrolyzing] 3-like n=1 Tax=Cicer arietinum RepID=UPI00032AC891 (UniRef100_UPI00032AC891 icov:94% qcovs:92.8% e-val:0)	amino acid metabolism.synthesis.aspartate family.asparagine.asparagine synthetase	1	0.218481	4.70483e-05	0.00160368	2.75296	0.43917	0.300168	0.986246	0.373901	0.262513	1.06907	0.119084	0.0916963	1.05196	0.839096	0.666991	0.45117	0.373901	0.593758	0.57549	0.136107	0.48015	1.03611	0.0248168	0.0296164	X
>generic|frv2_118756|p.sativum_wa1_contig24447_5	frv2_118756;frv2_108358;Q9FHM7;frv2_94873;frv2_74532	p.sativum_wa1_contig24447_5 SPFH/band 7/PHB domain membrane-associated family protein n=1 Tax=Medicago truncatula RepID=I3SG23_MEDTR (UniRef100_I3SG23 icov:92% qcovs:94.83% e-val:0)	not assigned.no ontology	1	0.333149	0.00479252	0.0123958	2.65467	0.39415	0.293788	0.24038	0.346078	0.262513	1.1403	0.127883	0.094844	0.812068	0.565612	0.587484	0.469667	0.373901	0.593758	0.617227	0.219217	0.543696	1.9077	0.125164	0.0636591
>generic|frv2_86824|Pisum_sativum_v2_Contig7386_6	frv2_86824;frv2_40313	Pisum_sativum_v2_Contig7386_6 Nucleic acid-binding, OB-fold-like protein n=1 Tax=Medicago truncatula RepID=B7FKB1_MEDTR (UniRef100_B7FKB1 icov:99% qcovs:97.79% e-val:2e-91)	not assigned.no ontology	1	0.415625	0.010553	0.0176904	2.63049	0.0948721	0.153504	0.140808	0.0459502	0.0861916	1.12535	0.172093	0.109954	1.1085	0.773593	0.646879	0.244983	0.236108	0.593758	1.15867	0.576331	0.589252	1.47501	0.0485614	0.0422638
>generic|carvalho18106|PsCam023839_1_AA	Q4QY64	PsCam023839_1_AA ATPase family AAA domain-containing protein 5 OS=Mus musculus GN=Atad5 PE=1 SV=1 (sp	not assigned.unknown	1	0.259531	0.00305271	0.0107414	2.07891	0.540734	0.317689	1.04714	0.495827	0.292915	0.93704	0.00400464	0.0133343	0.7874	0.248895	0.483783	0.206724	0.373901	0.593758	0.978911	0.608478	0.597915	0.899601	0.00951052	0.0191252	X
>generic|frv2_125899|p.sativum_wa1_contig29330_5	frv2_125899;P05477	p.sativum_wa1_contig29330_5 Heat-shock protein, putative n=1 Tax=Ricinus communis RepID=B9RQT7_RICCO (UniRef100_B9RQT7 icov:81% qcovs:82.5% e-val:1e-81)	stress.abiotic.heat	1	0.324715	0.00726302	0.0142826	1.99297	0.584821	0.329902	0.617225	0.373901	0.262513	1.02744	0.384497	0.190949	1.07521	0.795397	0.65176	0.303662	0.314645	0.593758	1.658	0.732267	0.637403	2.66144	0.0239889	0.0292063
>generic|frv2_121298|p.sativum_wa1_contig26299_6	frv2_121298;frv2_59391	p.sativum_wa1_contig26299_6 PREDICTED: glutathione S-transferase L3-like n=1 Tax=Cicer arietinum RepID=UPI00032ABB0B (UniRef100_UPI00032ABB0B icov:89% qcovs:79.75% e-val:6e-141)	misc.glutathione S transferases	1	0.450279	0.00035351	0.00570773	1.58746	0.176331	0.220351	0.386398	0.011101	0.0348213	4.12029	0.0953282	0.0791791	0.915592	0.496541	0.563961	0.309523	0.0557619	0.593758	0.759366	0.462213	0.563553	5.48155	0.0506435	0.0427161
>generic|frv2_10786|franssen_6302_2	frv2_10786	franssen_6302_2 PREDICTED: UDP-glucose 4-epimerase GEPI48-like n=1 Tax=Cicer arietinum RepID=UPI00032A7935 (UniRef100_UPI00032A7935 icov:91% qcovs:98.97% e-val:4e-60)	cell wall.precursor synthesis.UGE	1	0.41998	0.0179924	0.0248629	1.16947	0.821908	0.377034	0.965305	0.653506	0.329258	0.958403	0.212451	0.124451	0.897078	0.732001	0.634168	0.195438	0.139457	0.593758	0.776663	0.410439	0.560593	0.66082	0.0288703	0.0316178	X
>generic|frv2_74837|Pisum_sativum_v2_Contig659_5	frv2_74837;P49215;frv2_59513	Pisum_sativum_v2_Contig659_5 Uncharacterized protein n=2 Tax=Soja RepID=I1L9G9_SOYBN (UniRef100_I1L9G9 icov:76% qcovs:94.12% e-val:5e-85)	protein.synthesis.ribosomal protein.eukaryotic.40S subunit.S17	1	0.297752	0.025707	0.0306482	8.0021	0.177043	0.220351	0.0878702	0.177043	0.191817	0.365706	0.025707	0.0355869	1.1815	0.194559	0.442723	0.982803	0.978723	0.720682	0.153781	0.159672	0.48784	0.40943	0.0928525	0.0561134
>generic|frv2_84012|Pisum_sativum_v2_Contig5978_1	frv2_84012;Q9C5Z2	Pisum_sativum_v2_Contig5978_1 Eukaryotic translation initiation factor 3 subunit H n=1 Tax=Medicago truncatula RepID=A2Q5B8_MEDTR (UniRef100_A2Q5B8 icov:89% qcovs:97.34% e-val:0)	protein.synthesis.initiation	1	0.411661	0.00438872	0.0121295	4.28221	0.348458	0.286729	0.202634	0.305063	0.251914	0.418997	0.00133099	0.00940861	0.966254	0.396752	0.539012	0.959787	0.950415	0.720682	0.701211	0.0505866	0.337862	2.29761	0.196471	0.0805453
>generic|frv2_77832|Pisum_sativum_v2_Contig2711_1	frv2_77832;frv2_47773	Pisum_sativum_v2_Contig2711_1 4-hydroxy-tetrahydrodipicolinate synthase n=1 Tax=Medicago truncatula RepID=A0A072VMI5_MEDTR (UniRef100_A0A072VMI5 icov:88% qcovs:91.28% e-val:0)	amino acid metabolism.synthesis.aspartate family.lysine.dihydrodipicolinate synthase	1	0.403493	0.00787127	0.0148737	3.62921	0.168111	0.214636	0.182325	0.141834	0.172728	0.230388	0.589754	0.257476	1.07261	0.613133	0.610148	0.946863	0.960771	0.720682	0.507349	0.895978	0.685443	1.24973	0.985315	0.24929
>generic|frv2_88369|Pisum_sativum_v2_Contig8158_2	frv2_88369;frv2_55860	Pisum_sativum_v2_Contig8158_2 PREDICTED: tripeptidyl-peptidase 2-like n=1 Tax=Cicer arietinum RepID=UPI00032AD3DC (UniRef100_UPI00032AD3DC icov:77% qcovs:81.28% e-val:2e-103)	protein.degradation.serine protease	1	0.282787	0.00501051	0.0123958	3.2288	0.320627	0.276765	0.492917	0.247518	0.23311	0.810627	0.189389	0.115879	0.88385	0.408212	0.544356	0.851531	0.796858	0.676259	0.66665	0.0928214	0.415986	2.29533	0.208479	0.083873
>generic|frv2_104966|p.sativum_wa1_contig12910_4	frv2_104966	p.sativum_wa1_contig12910_4 110 kDa 4SNc-Tudor domain protein n=3 Tax=Pisum sativum RepID=Q8L5C2_PEA (UniRef100_Q8L5C2 icov:100% qcovs:97.64% e-val:0)	RNA.regulation of transcription.Zn-finger(CCHC)	1	0.327747	0.00240961	0.00998919	2.76541	0.0572144	0.115536	1.06152	0.0310377	0.0654966	0.7403	0.0904332	0.0766463	1.25999	0.109049	0.387499	0.518867	0.506172	0.606728	0.901595	0.787451	0.653025	0.927788	0.0511609	0.0427161	X
>generic|carvalho31328|PsCam045019_1_AA	P52903;frv2_112323	PsCam045019_1_AA Pyruvate dehydrogenase E1 component subunit alpha, mitochondrial OS=Solanum tuberosum PE=1 SV=1 (sp	TCA / org transformation.TCA.pyruvate DH.E1	1	0.405087	0.0100026	0.0171425	2.69787	0.346244	0.286098	0.162214	0.215127	0.215307	1.27742	0.632289	0.266587	0.91042	0.398451	0.53987	0.575297	0.332046	0.593758	1.66751	0.600572	0.594492	2.81244	0.0856888	0.0545452
>generic|frv2_22141|franssen_13058_1	frv2_22141	franssen_13058_1 Uncharacterized protein n=1 Tax=Glycine max RepID=K7LYT3_SOYBN (UniRef100_K7LYT3 icov:99% qcovs:94.39% e-val:2e-61)	protein.degradation.ubiquitin	1	0.359553	9.3738e-06	0.000718905	2.5351	0.402807	0.295706	0.694263	0.364928	0.262513	0.759673	0.269237	0.146112	1.35602	0.558771	0.585163	1	nan	nan	0.288011	0.198531	0.519603	0.471064	0.208572	0.083873	X
>generic|frv2_111341|p.sativum_wa1_contig18268_4	frv2_111341	p.sativum_wa1_contig18268_4 1,4-alpha-glucan-branching enzyme 1, chloroplastic/amyloplastic n=1 Tax=Pisum sativum RepID=GLGB1_PEA (UniRef100_Q41058 icov:99% qcovs:100% e-val:0)	major CHO metabolism.synthesis.starch.starch branching	1	0.404445	0.00332735	0.0109757	2.3734	0.354061	0.286797	1.85958	0.262505	0.238004	1.00737	0.320141	0.166713	1.026	0.907197	0.685356	0.803985	0.718342	0.653616	0.515773	0.709253	0.630488	0.360498	0.398473	0.128921	X
>generic|carvalho17674|PsCam023211_1_AA	P23525;frv2_84144;frv2_51156	PsCam023211_1_AA 2-methyl-6-phytyl-1,4-hydroquinone methyltransferase, chloroplastic OS=Spinacia oleracea PE=1 SV=1 (sp	secondary metabolism.isoprenoids.tocopherol biosynthesis.MPBQ/MSBQ methyltransferase	1	0.370999	0.00024688	0.00445506	2.16936	0.403448	0.295706	0.491331	0.303566	0.251223	0.750874	0.737216	0.295454	1.28869	0.145064	0.428675	0.507653	0.215056	0.593758	1	0.996096	0.70742	1.79222	0.00368531	0.0114462
>generic|frv2_45349|franssen_27863_5	frv2_45349;frv2_45341;frv2_579;E1C9K9;Q84L18;frv2_582;frv2_96148;frv2_75620;frv2_75623;frv2_45342	franssen_27863_5 Ribosomal protein L19 n=2 Tax=Medicago truncatula RepID=I3SA92_MEDTR (UniRef100_I3SA92 icov:87% qcovs:92.24% e-val:2e-126)	protein.synthesis.ribosomal protein.eukaryotic.60S subunit.L19	1	0.318196	8.47996e-07	0.000260141	1.93142	0.87401	0.391763	0.485593	0.373901	0.262513	0.220682	0.83696	0.317432	0.809176	0.0855581	0.369659	1	nan	nan	0.230527	0.000847492	0.061254	1.81163	2.62438e-05	0.000612191
>generic|frv2_76776|Pisum_sativum_v2_Contig2063_5	frv2_76776;frv2_47527;frv2_47822;frv2_47530;P35685;frv2_73816	Pisum_sativum_v2_Contig2063_5 Ribosomal protein L7Ae/L30e/S12e/Gadd45 family protein n=1 Tax=Medicago truncatula RepID=A0A072TYM4_MEDTR (UniRef100_A0A072TYM4 icov:94% qcovs:96.54% e-val:5e-180)	protein.synthesis.ribosomal protein.eukaryotic.60S subunit.L7A	1	0.329503	0.00327237	0.0109116	1.90746	0.180324	0.220351	0.51078	0.0670883	0.109641	1.129	0.0306491	0.0388657	1.38081	0.320437	0.50134	1.72352	0.654654	0.627901	3.39631	0.483187	0.567002	1.37609	0.786986	0.212905
>generic|frv2_47537|franssen_29149_3	frv2_47537;frv2_86337;Q94JX9	franssen_29149_3 Nascent proteinassociated complex alpha chain n=1 Tax=Medicago truncatula RepID=B7FMW4_MEDTR (UniRef100_B7FMW4 icov:89% qcovs:93.67% e-val:8e-94)	protein.synthesis.elongation	1	0.398486	0.00122051	0.00796634	1.88695	0.460306	0.302738	0.310277	0.373901	0.262513	0.949936	0.345793	0.176664	1	nan	nan	1	nan	nan	1	0	0	1	0	0
>generic|carvalho40325|PsCam057868_1_AA	Q96453;frv2_35077	PsCam057868_1_AA 14-3-3-like protein D OS=Glycine max GN=GF14D PE=2 SV=1 (sp	signalling.14-3-3 proteins	1	0.190105	0.0015468	0.0087873	1.84126	0.774891	0.366768	0.215341	0.315775	0.253749	1.41944	0.17251	0.110009	1.31465	0.457742	0.556725	0.577627	0.547816	0.618595	1.39449	0.904745	0.688353	4.13083	0.195855	0.080456
>generic|carvalho12461|PsCam011292_1_AA	Q9M3V8;frv2_120432;frv2_59202;frv2_99208;frv2_76883	PsCam011292_1_AA 40S ribosomal protein S6 OS=Asparagus officinalis GN=rps6 PE=2 SV=1 (sp	protein.synthesis.ribosomal protein.eukaryotic.40S subunit.S6	1	0.439395	0.034358	0.0363451	1.83644	0.381811	0.289498	0.127953	0.190259	0.201065	0.443798	0.162758	0.107801	1.29805	0.273603	0.490887	0.788821	0.74	0.662374	0.0893793	0.73709	0.637487	0.125269	0.238344	0.0914452
>generic|frv2_75184|Pisum_sativum_v2_Contig914_1	frv2_75184;frv2_95502;frv2_48079;P28188	Pisum_sativum_v2_Contig914_1 GTP-binding protein n=1 Tax=Pisum sativum RepID=Q08154_PEA (UniRef100_Q08154 icov:95% qcovs:100% e-val:5e-148)	signalling.G-proteins	1	0.496166	0.000408956	0.00616914	1.81446	0.592952	0.332888	0.310866	0.431516	0.278253	1.22807	0.147743	0.10105	1.92341	0.0817953	0.369659	1.38402	0.611069	0.621285	1.6713	0.433927	0.560593	1.38775	0.0593829	0.0452689
>generic|frv2_50534|franssen_31186_5	frv2_50534;frv2_111455;Q9C550	franssen_31186_5 PREDICTED: 2-isopropylmalate synthase 2, chloroplastic-like n=1 Tax=Cicer arietinum RepID=UPI00032A9E79 (UniRef100_UPI00032A9E79 icov:99% qcovs:89.68% e-val:0)	amino acid metabolism.synthesis.branched chain group.leucine specific.2-isopropylmalate synthase	1	0.338574	0.00109234	0.00796634	1.45862	0.560013	0.324048	0.824841	0.373901	0.262513	0.93604	0.0435083	0.0501914	1.4519	0.0811163	0.369659	1.36736	0.670099	0.629304	1.97991	0.184137	0.504111	1.59529	0.360087	0.120341
>generic|frv2_19119|franssen_11282_6	frv2_19119	franssen_11282_6 GT1 n=1 Tax=Medicago truncatula RepID=D2D581_MEDTR (UniRef100_D2D581 icov:76% qcovs:83.1% e-val:6e-33)	not assigned.unknown	1	0.486023	0.0336424	0.0360859	1.00467	0.692307	0.344163	1.39273	0.407399	0.274155	1.31071	0.0515695	0.056073	1.12145	0.563947	0.587484	0.617487	0.578436	0.62084	0.455792	0.136482	0.48015	0.311151	0.00275132	0.00943828	X
>generic|frv2_9554|franssen_5578_4	frv2_9554;frv2_85284	franssen_5578_4 Phosphoglucan, water dikinase n=1 Tax=Medicago truncatula RepID=A0A072UBU6_MEDTR (UniRef100_A0A072UBU6 icov:98% qcovs:88.06% e-val:0)	major CHO metabolism.degradation.starch.glucan water dikinase	1	0.342179	2.48398e-06	0.000285251	0.806397	0.860285	0.388125	0.150723	0.373901	0.262513	1.06097	0.488083	0.223978	0.795521	0.109176	0.387499	1.05985	0.89508	0.71049	0.248568	0.0119206	0.189371	2.02938	0.0490996	0.0422638
>generic|frv2_8951|franssen_5214_6	frv2_8951;frv2_52002	franssen_5214_6 PREDICTED: uncharacterized protein LOC101496013 n=1 Tax=Cicer arietinum RepID=UPI00032A50E3 (UniRef100_UPI00032A50E3 icov:95% qcovs:92.47% e-val:8e-95)	not assigned.unknown	1	0.399758	0.00467463	0.0122568	0.732206	0.130454	0.187075	0.399033	0.0796147	0.120623	1.14243	0.153367	0.103356	1.01756	0.936175	0.691832	0.52783	0.558864	0.618661	1.01871	0.580868	0.589252	0.835313	0.0151581	0.024413
>generic|frv2_112199|p.sativum_wa1_contig19099_6	frv2_112199;Q9C9C4;frv2_57745	p.sativum_wa1_contig19099_6 PREDICTED: enolase 1, chloroplastic-like n=1 Tax=Cicer arietinum RepID=UPI00032A9BC3 (UniRef100_UPI00032A9BC3 icov:98% qcovs:92.24% e-val:0)	glycolysis.cytosolic branch.enolase	1	0.474788	2.48332e-05	0.00117548	0.382401	0.371693	0.286797	0.186931	0.309164	0.251914	0.684875	0.0856713	0.0739745	0.963596	0.703679	0.624206	1.88427	0.373901	0.593758	1.66059	0.00105365	0.0626738	1.55795	0.173076	0.0756299
>generic|frv2_49263|franssen_30292_4	frv2_49263	franssen_30292_4 Serine carboxypeptidase-like protein n=1 Tax=Medicago truncatula RepID=G7IU67_MEDTR (UniRef100_G7IU67 icov:100% qcovs:84.93% e-val:2e-167)	protein.degradation	1	0.527085	0.409208	0.179848	4.87598	8.55575e-05	0.00282192	1.25155	9.24922e-05	0.00164227	0.869952	0.864921	0.324334	1.91901	0.000588779	0.0485791	0.574405	0.607274	0.621285	0.997676	0.358474	0.560593	2.12754	0.627289	0.179104	X
>generic|frv2_118478|p.sativum_wa1_contig24232_6	frv2_118478	p.sativum_wa1_contig24232_6 GDSL-like lipase/acylhydrolase n=1 Tax=Medicago truncatula RepID=G7I356_MEDTR (UniRef100_G7I356 icov:97% qcovs:64.1% e-val:4e-148)	misc.GDSL-motif lipase	1	0.56492	0.373901	0.168928	4.61014	0.00127484	0.0146722	3.4248	0.000906226	0.00703186	1.38716	0.752001	0.297079	3.03241	0.00791515	0.162328	0.523043	0.563535	0.618661	1.91009	0.325078	0.560593	1.63558	0.7402	0.203094	X
>generic|carvalho26837|PsCam037836_1_AA	Q7Z9L3;frv2_113029	PsCam037836_1_AA Glucan 1,3-beta-glucosidase A OS=Aspergillus oryzae (strain ATCC 42149 / RIB 40) GN=exgA PE=1 SV=1 (sp	not assigned.unknown	1	2.45417	0.125394	0.0807849	6.93809	0.00977106	0.0423902	0.150752	0.00776064	0.0276933	0.443955	0.00013176	0.00348548	8.87466	8.8406e-05	0.0192452	0.159148	0.444192	0.602515	0.401176	0.372246	0.560593	1.20154	0.87319	0.227332
>generic|frv2_114528|p.sativum_wa1_contig21150_4	frv2_114528	p.sativum_wa1_contig21150_4 Pectinacetylesterase family protein n=1 Tax=Medicago truncatula RepID=G7L755_MEDTR (UniRef100_G7L755 icov:92% qcovs:84.12% e-val:0)	cell wall.pectin esterases.acetyl esterase	1	0.858333	0.715768	0.268432	5.85446	0.0158183	0.0558996	3.71601	0.00961703	0.0322468	1.27792	0.0252244	0.0352122	2.90732	0.0361861	0.288197	0.159104	0.385942	0.593758	1.16883	0.333764	0.560593	2.40275	0.881596	0.229009	X
>generic|frv2_104598|p.sativum_wa1_contig12591_4	frv2_104598;frv2_104600	p.sativum_wa1_contig12591_4 Annexin n=2 Tax=Medicago truncatula RepID=G7LF88_MEDTR (UniRef100_G7LF88 icov:99% qcovs:91.99% e-val:0)	cell.organisation	1	1	nan	nan	12.8959	0.0303631	0.0776035	0.143176	0.0238215	0.0551523	0.299137	0.000717691	0.0068127	4.15936	0.0291825	0.25256	0.156886	0.415432	0.599086	0.236332	0.373901	0.560593	0.231253	0.151095	0.0706332
>generic|frv2_80769|Pisum_sativum_v2_Contig4363_3	frv2_80769	Pisum_sativum_v2_Contig4363_3 PREDICTED: aminopeptidase N-like n=1 Tax=Cicer arietinum RepID=UPI00032A901F (UniRef100_UPI00032A901F icov:99% qcovs:91.95% e-val:0)	protein.degradation	1	0.843193	0.333018	0.156113	2.42869	0.0477813	0.105651	1.08821	0.0180693	0.0468549	1.01033	0.13916	0.0992807	1.72214	0.0297779	0.25256	0.611034	0.582837	0.62084	1.41201	0.34484	0.560593	1.11619	0.752915	0.205659	X
>generic|carvalho19012|PsCam025333_1_AA	O04300	PsCam025333_1_AA Alpha-1,4-glucan-protein synthase [UDP-forming] OS=Pisum sativum GN=UPTG PE=1 SV=1 (sp	cell wall.cell wall proteins.RGP	1	0.951403	0.661503	0.252715	2.82531	0.0379226	0.0888135	1.16211	0.116063	0.153029	0.976487	0.0236167	0.0342379	1.16462	0.156608	0.436039	0.78445	0.588318	0.62084	0.436143	0.493272	0.567228	0.696934	0.0824031	0.0534594	X
>generic|frv2_113641|p.sativum_wa1_contig20389_5	frv2_113641;P29102	p.sativum_wa1_contig20389_5 PREDICTED: 3-isopropylmalate dehydrogenase, chloroplastic-like n=1 Tax=Cicer arietinum RepID=UPI00032A825E (UniRef100_UPI00032A825E icov:95% qcovs:90.69% e-val:0)	amino acid metabolism.synthesis.branched chain group.leucine specific.3-isopropylmalate dehydrogenase	1	1.07202	0.337659	0.157184	2.08285	0.0098802	0.0423902	0.233943	0.00446577	0.0192833	0.910214	0.0131658	0.024574	0.933628	0.600806	0.605821	0.713473	0.457066	0.602515	0.991549	0.437425	0.560593	1.81484	0.867706	0.227031
>generic|frv2_111304|p.sativum_wa1_contig18230_6	frv2_111304	p.sativum_wa1_contig18230_6 Vacuolar-sorting receptor 1 n=1 Tax=Pisum sativum RepID=VSR1_PEA (UniRef100_P93484 icov:99% qcovs:99.84% e-val:0)	protein.targeting.secretory pathway.vacuole	1	1.39824	0.0663782	0.055035	2.08239	0.00623597	0.0326772	1.37971	0.0213253	0.0515197	1.08686	0.953756	0.345933	0.87673	0.577622	0.594999	0.60816	0.505256	0.606728	1.29851	0.310791	0.560593	0.802453	0.0599797	0.0455739	X
>generic|frv2_47746|franssen_29283_1	frv2_47746;frv2_117087;Q9M4S8	franssen_29283_1 Triosephosphate isomerase n=1 Tax=Medicago truncatula RepID=A0A072U2W1_MEDTR (UniRef100_A0A072U2W1 icov:92% qcovs:93.63% e-val:0)	PS.calvin cycle.TPI	1	1.21637	0.132312	0.0831754	2.19019	0.0339077	0.0820419	0.954284	0.00061864	0.00572919	0.890343	0.0200651	0.0317448	1.2616	0.112621	0.391612	0.581568	0.507723	0.606728	1.18913	0.485281	0.567002	1.92999	0.547181	0.163853
>generic|carvalho19072|PsCam025419_1_AA	Q43644	PsCam025419_1_AA NADH dehydrogenase [ubiquinone] iron-sulfur protein 1, mitochondrial OS=Solanum tuberosum PE=2 SV=1 (sp	mitochondrial electron transport / ATP synthesis.NADH-DH.localisation not clear	1	0.891431	0.703305	0.265356	2.55124	0.0075185	0.0362898	8.10592	0.00608473	0.0239062	0.942414	0.299624	0.15902	1.1041	0.588244	0.600121	0.479915	0.48997	0.606728	1.08669	0.732502	0.637403	2.5577	0.328076	0.112711	X
>generic|frv2_118137|p.sativum_wa1_contig23971_6	frv2_118137;frv2_92374	p.sativum_wa1_contig23971_6 Uncharacterized protein n=2 Tax=Soja RepID=I1JT95_SOYBN (UniRef100_I1JT95 icov:98% qcovs:90.81% e-val:0)	mitochondrial electron transport / ATP synthesis.NADH-DH.complex I.carbonic anhydrase	1	1.15815	0.398805	0.176032	2.13729	0.00215688	0.0166001	1.51121	0.000599957	0.00569168	0.822668	0.062687	0.0628156	0.603762	0.0826427	0.369659	0.451575	0.349141	0.593758	1.27581	0.459948	0.563553	0.726511	0.393895	0.128151
>generic|carvalho31614|PsCam045359_1_AA	Q03685	PsCam045359_1_AA Luminal-binding protein 5 OS=Nicotiana tabacum GN=BIP5 PE=2 SV=1 (sp	stress.abiotic.heat	1	0.824305	0.144994	0.0872161	2.25721	0.0164897	0.0569763	2.1807	0.0153004	0.0417936	1.29342	0.0619173	0.0627839	1.28216	0.186643	0.442581	0.44597	0.31941	0.593758	1.92905	0.617209	0.602987	2.46616	0.0860294	0.0545452	X
>generic|frv2_75901|Pisum_sativum_v2_Contig1490_6	frv2_75901;frv2_117027	Pisum_sativum_v2_Contig1490_6 Cytochrome c1, heme protein n=1 Tax=Medicago truncatula RepID=G7KN93_MEDTR (UniRef100_G7KN93 icov:99% qcovs:94.77% e-val:0)	mitochondrial electron transport / ATP synthesis.cytochrome c	1	1.50316	0.0753468	0.0600945	2.04812	0.0164982	0.0569763	1.9584	0.00492592	0.0203828	1.03108	0.0609953	0.0623537	0.935876	0.674519	0.617429	0.395372	0.297301	0.593758	0.705097	0.544481	0.584419	1.88489	0.317038	0.10989
>generic|frv2_70608|franssen_43621_4	frv2_70608;frv2_74187;frv2_69341;P43297;frv2_44580;frv2_43410;frv2_44232;frv2_72858;frv2_42591;frv2_71310;frv2_42855;frv2_72699;frv2_41214;frv2_37992;frv2_71022;frv2_43303;frv2_71335;frv2_40310	franssen_43621_4 Thiolprotease n=1 Tax=Pisum sativum RepID=Q41064_PEA (UniRef100_Q41064 icov:97% qcovs:99.01% e-val:1e-61)	protein.degradation.cysteine protease	1	1.29995	0.442587	0.18983	2.55549	0.0306893	0.0776035	0.49558	4.38992e-05	0.00113833	1.31716	0.018489	0.0304097	0.930757	0.870143	0.674918	0.37675	0.368407	0.593758	1.23867	0.441354	0.560593	2.28827	0.7618	0.2076
>generic|frv2_132363|p.sativum_wa1_contig33207_4	frv2_132363;frv2_66974	p.sativum_wa1_contig33207_4 Oligosaccharyltransferase subunit ribophorin II n=1 Tax=Medicago truncatula RepID=A0A072VM58_MEDTR (UniRef100_A0A072VM58 icov:93% qcovs:87.82% e-val:6e-98)	development.unspecified	1	0.972265	0.944897	0.322434	13.2478	0.0222455	0.0677277	2.03159	0.0200817	0.0494365	0.859656	0.150743	0.102209	1.16453	0.482905	0.563493	0.241813	0.429296	0.600818	0.936	0.404863	0.560593	2.84143	0.964339	0.245313
>generic|frv2_48564|franssen_29825_2	frv2_48564;frv2_74451	franssen_29825_2 Signal peptidase complex subunit 3B-like protein n=1 Tax=Medicago truncatula RepID=G7IWJ5_MEDTR (UniRef100_G7IWJ5 icov:94% qcovs:86.23% e-val:4e-105)	protein.targeting.secretory pathway.unspecified	1	1.1423	0.0933408	0.0675811	4.56211	0.0157722	0.0558996	0.307159	0.016713	0.0439234	1.99086	0.610576	0.26175	0.925581	0.618078	0.61066	0.13744	0.266445	0.593758	1.58552	0.446133	0.560593	2.2655	0.00183296	0.00768545
>generic|carvalho28722|PsCam040541_1_AA	O50001	PsCam040541_1_AA Major allergen Pru ar 1 OS=Prunus armeniaca PE=1 SV=1 (sp	not assigned.unknown	1	1	nan	nan	9.73077	0.148108	0.196054	1.22996	0.103139	0.143274	1.05973	0.00179551	0.0107365	3.0566	0.000441307	0.0485791	0.272006	0.471203	0.602515	1.09736	0.373901	0.560593	0.896895	0.850713	0.22398	X
>generic|frv2_71863|franssen_44448_1	frv2_71863;frv2_74907;frv2_95321;frv2_95315;frv2_95307;frv2_74908	franssen_44448_1 Non-specific lipid-transfer protein 5 n=1 Tax=Lens culinaris RepID=NLTP5_LENCU (UniRef100_A0AT31 icov:97% qcovs:66.97% e-val:8e-42)	not assigned.unknown	1	1	nan	nan	3.78838	0.183612	0.222349	0.0847946	0.0451937	0.0856398	0.593127	0.000146399	0.00348548	5.17221	0.0171553	0.217207	0.571483	0.669039	0.629304	0.23643	0.373901	0.560593	1.16606	0.764068	0.207733
>generic|frv2_112341|p.sativum_wa1_contig19225_4	frv2_112341;frv2_48639	p.sativum_wa1_contig19225_4 PREDICTED: adenosylhomocysteinase-like n=1 Tax=Cicer arietinum RepID=UPI00032A9F2F (UniRef100_UPI00032A9F2F icov:95% qcovs:96.08% e-val:0)	amino acid metabolism.degradation.aspartate family.methionine	1	0.728941	0.473676	0.199602	3.04394	0.240452	0.248483	0.172582	0.164053	0.185744	1.16027	0.029439	0.0383559	2.1439	0.0477676	0.3073	0.736039	0.588502	0.62084	3.11346	0.394031	0.560593	4.56873	0.147117	0.0701214
>generic|frv2_115218|p.sativum_wa1_contig21735_6	frv2_115218;A5DSK2	p.sativum_wa1_contig21735_6 Uncharacterized protein n=1 Tax=Medicago truncatula RepID=I3SH19_MEDTR (UniRef100_I3SH19 icov:97% qcovs:92.48% e-val:0)	not assigned.unknown	1	1.24888	0.116104	0.0781087	2.33917	0.539155	0.31755	0.916523	0.492448	0.292915	0.80838	0.563933	0.249481	2.12407	0.00781492	0.162328	1	nan	nan	0.952467	0.000611541	0.061254	2.39719	0.00152953	0.00686141
>generic|carvalho13381|PsCam012847_1_AA	Q9LSQ4	PsCam012847_1_AA Indole-3-acetic acid-amido synthetase GH3.6 OS=Arabidopsis thaliana GN=GH3.6 PE=1 SV=1 (sp	hormone metabolism.auxin.induced-regulated-responsive-activated	1	1	nan	nan	2.94493	0.0535721	0.112187	0.5455	0.0184074	0.0474155	0.40728	0.140467	0.0994181	3.76461	0.001744	0.0859285	1.25695	0.758524	0.663667	0.35352	0.373901	0.560593	0.387027	0.653081	0.184213	X
>generic|frv2_33545|franssen_19692_3	frv2_33545;frv2_41465;Q9M352;frv2_31658;frv2_39138;frv2_32253	franssen_19692_3 PREDICTED: 60S ribosomal protein L36-2-like n=1 Tax=Cicer arietinum RepID=UPI00032A972E (UniRef100_UPI00032A972E icov:91% qcovs:98.18% e-val:4e-68)	protein.synthesis.ribosomal protein.eukaryotic.60S subunit.L36	1	0.677073	0.319992	0.151255	2.12985	0.203739	0.231123	0.196841	0.212201	0.214924	0.948081	0.0984319	0.0807477	4.89229	0.0369045	0.288229	2.60723	0.373901	0.593758	3.09088	0	0	2.861	0.326278	0.112424
>generic|carvalho37074|PsCam052937_1_AA	Q9UTK4	PsCam052937_1_AA Nucleoporin nup189 OS=Schizosaccharomyces pombe (strain 972 / ATCC 24843) GN=nup189 PE=1 SV=1 (sp	not assigned.unknown	1	0.198001	0.109596	0.0752146	1.36948	0.944355	0.408937	1.4252	0.5141	0.296638	0.887414	0.448547	0.211324	5.6181	0.011238	0.186364	1	nan	nan	1.00038	0	0	0.619804	0.011238	0.0207896	X
>generic|carvalho29646|PsCam042195_1_AA	P26563;frv2_82656;frv2_49882	PsCam042195_1_AA Aspartate aminotransferase P2, mitochondrial (Fragment) OS=Lupinus angustifolius PE=2 SV=1 (sp	amino acid metabolism.synthesis.central amino acid metabolism.aspartate.aspartate aminotransferase	1	1.2991	0.377019	0.170087	1.96308	0.0293313	0.0758765	0.39023	0.0146627	0.0410301	0.770101	0.000233005	0.00483832	3.75445	0.00412945	0.120313	0.446964	0.595856	0.62084	1.42535	0.388859	0.560593	2.2815	0.787654	0.212905
>generic|frv2_99716|p.sativum_wa1_contig07912_2	frv2_99716	p.sativum_wa1_contig07912_2 GH3 auxin-responsive promoter n=1 Tax=Medicago truncatula RepID=A2Q639_MEDTR (UniRef100_A2Q639 icov:91% qcovs:79.05% e-val:1e-172)	hormone metabolism.auxin.induced-regulated-responsive-activated	1	1	nan	nan	1.20484	0.00385053	0.0249838	1.73764	0.00279347	0.0148842	0.77306	0.116118	0.0900467	2.56308	0.0269453	0.25256	0.519689	0.587054	0.62084	0.896581	0.373901	0.560593	0.782702	0.790086	0.213315	X
>generic|frv2_126395|p.sativum_wa1_contig29647_6	frv2_126395;Q8L5T9	p.sativum_wa1_contig29647_6 Cysteine protease inhibitor cystatin n=1 Tax=Medicago truncatula RepID=A0A072TSY5_MEDTR (UniRef100_A0A072TSY5 icov:97% qcovs:77.94% e-val:1e-66)	protein.degradation.cysteine protease	1	1.35568	0.14368	0.0870173	0.0730232	0.331083	0.27944	0.316827	0.471272	0.284282	1.11382	0.345258	0.176664	0.470986	0.0484661	0.3073	0.419433	0.153687	0.593758	0.734667	0.779521	0.650433	1.77849	0.696659	0.193632
>generic|frv2_53539|franssen_33244_1	frv2_53539;frv2_115590;Q9ZWQ8	franssen_33244_1 PREDICTED: plastid-lipid-associated protein, chloroplastic-like n=1 Tax=Cicer arietinum RepID=UPI00032A88F8 (UniRef100_UPI00032A88F8 icov:85% qcovs:84.01% e-val:0)	cell.organisation	1	0.636725	0.153034	0.0901084	1.84354	0.462583	0.302738	0.157544	0.373901	0.262513	0.748066	0.443007	0.210563	0.374457	4.16127e-05	0.0185792	1	nan	nan	0.629623	4.16127e-05	0.00680689	0.639951	0	0
>generic|frv2_122156|p.sativum_wa1_contig26885_4	frv2_122156	p.sativum_wa1_contig26885_4 PREDICTED: universal stress protein A-like protein-like n=1 Tax=Cicer arietinum RepID=UPI00032A9B04 (UniRef100_UPI00032A9B04 icov:98% qcovs:92% e-val:2e-117)	stress.abiotic.unspecified	1	1.14206	0.123849	0.0806654	1.50889	0.814043	0.376643	0.979144	0.424452	0.277937	0.834025	0.824068	0.315423	0.332206	0.00210521	0.0859285	0.496753	0.161241	0.593758	0.750027	0.202628	0.523091	1.17695	0	0	X
>generic|frv2_58952|franssen_36566_4	frv2_58952;frv2_134355;Q92BB4	franssen_36566_4 Uncharacterized protein n=1 Tax=Medicago truncatula RepID=A0A072TGB8_MEDTR (UniRef100_A0A072TGB8 icov:95% qcovs:71.31% e-val:3e-39)	not assigned.unknown	1	1.0872	0.662966	0.252959	5.22023	0.373901	0.286797	0.220096	0.714148	0.346258	0.960346	0.0107076	0.0222218	0.283644	5.68977e-05	0.0185792	0.263796	0.373901	0.593758	2.98163	0.281377	0.560593	2.84693	0.0103837	0.0199642
>generic|frv2_83478|Pisum_sativum_v2_Contig5713_2	frv2_83478;frv2_53844;Q9SU13	Pisum_sativum_v2_Contig5713_2 Putative fasciclin-like arabinogalactan protein FLA2 n=1 Tax=Trifolium pratense RepID=Q2PES4_TRIPR (UniRef100_Q2PES4 icov:96% qcovs:91.07% e-val:0)	cell wall.cell wall proteins.AGPs.AGP	1	0.585267	0.0874255	0.0646258	1.96751	0.730879	0.354505	0.407425	0.310524	0.251914	0.688907	0.0783057	0.0698357	1.1545	0.477067	0.563493	0.276689	0.000740792	0.163904	0.760542	0.0709261	0.38153	2.24323	0.00607091	0.0144507
>generic|frv2_47058|franssen_28844_3	frv2_47058;frv2_118143	franssen_28844_3 Putative uncharacterized protein n=1 Tax=Medicago truncatula RepID=B7FL02_MEDTR (UniRef100_B7FL02 icov:96% qcovs:89.24% e-val:0)	misc.oxidases - copper, flavone etc	1	1.28482	0.128729	0.0817611	1.40726	0.515081	0.308887	1.16056	0.465686	0.28302	0.979527	0.139551	0.0992807	0.861087	0.123395	0.405919	0.284302	0.0102746	0.593758	0.82563	0.348111	0.560593	1.98641	5.60607e-05	0.000934094
>generic|frv2_113709|p.sativum_wa1_contig20445_6	frv2_113709;Q9C5C4;frv2_94198	p.sativum_wa1_contig20445_6 PREDICTED: acetylornithine deacetylase-like n=1 Tax=Cicer arietinum RepID=UPI00032AB6FE (UniRef100_UPI00032AB6FE icov:96% qcovs:90.64% e-val:0)	protein.degradation	1	1.06578	0.39083	0.174267	3.41203	0.210419	0.234197	1.06887	0.308297	0.251914	1.60143	0.0280364	0.0377116	1.41108	0.137019	0.425888	0.330413	0.00260056	0.340665	1.66	0.354204	0.560593	2.07108	0.00189838	0.00768545
>generic|frv2_24850|franssen_14700_2	frv2_24850;Q9SJZ2;frv2_85256	franssen_14700_2 Peroxidase n=2 Tax=Medicago truncatula RepID=G7JKV1_MEDTR (UniRef100_G7JKV1 icov:99% qcovs:83.93% e-val:0)	misc.peroxidases	1	1.86119	0.373901	0.168928	5.43841	0.295922	0.27021	0.201023	0.328235	0.256485	1	0.373901	0.187367	1	nan	nan	0.345558	0.00681696	0.541925	2.38173	0.00681696	0.143846	2.33535	0	0
>generic|frv2_84734|Pisum_sativum_v2_Contig6343_1	frv2_84734;frv2_22400	Pisum_sativum_v2_Contig6343_1 Phosphoglucomutase/phosphomannomutase family protein n=1 Tax=Medicago truncatula RepID=G7I385_MEDTR (UniRef100_G7I385 icov:100% qcovs:96.95% e-val:0)	glycolysis.plastid branch.phosphoglucomutase (PGM)	1	1.12498	0.336312	0.157034	0.940449	0.598218	0.334088	2.22039	0.338541	0.26075	1.03021	0.675454	0.27773	1.01343	0.865977	0.674877	0.486293	0.0451756	0.593758	1.52418	0.0473216	0.335707	2.17805	0.147859	0.0701214
>generic|frv2_106235|p.sativum_wa1_contig13892_5	frv2_106235	p.sativum_wa1_contig13892_5 Uncharacterized protein n=1 Tax=Medicago truncatula RepID=G7I467_MEDTR (UniRef100_G7I467 icov:91% qcovs:79.58% e-val:4e-179)	protein.degradation.aspartate protease	1	1.21493	0.105019	0.0733868	0.207541	0.0200937	0.0633147	0.757427	0.209472	0.214303	0.997115	0.00035462	0.00535538	0.942671	0.684252	0.6185	1.3618	0.462567	0.602515	1.30896	0.261865	0.560593	0.421463	0.607254	0.175098	X
>generic|frv2_50256|franssen_30982_6	frv2_50256;frv2_82730;Q9ZUP3	franssen_30982_6 NAP1Ps n=1 Tax=Pisum sativum RepID=P93488_PEA (UniRef100_P93488 icov:86% qcovs:94.61% e-val:0)	DNA.synthesis/chromatin structure	1	1.67178	0.226843	0.11637	0.754056	0.634876	0.338541	0.478133	0.445193	0.280652	0.757568	0.0037546	0.0131308	3.03033	0.00536683	0.146039	0.340077	0.0213827	0.593758	1	0.00552222	0.138971	1	0.0986755	0.0574017
>generic|frv2_46800|franssen_28697_1	frv2_46800;frv2_84373	franssen_28697_1 60S ribosomal protein L3B n=4 Tax=Medicago truncatula RepID=G7IBY1_MEDTR (UniRef100_G7IBY1 icov:94% qcovs:98.2% e-val:0)	protein.synthesis.ribosomal protein.eukaryotic.60S subunit.L3	1	0.856626	0.643771	0.247854	0.972732	0.185198	0.222796	0.207897	0.154016	0.181533	1.26231	0.00224541	0.0111345	2.28031	0.000784455	0.0521075	1.95849	0.188276	0.593758	0.548574	0.530108	0.577495	0.920721	0.991748	0.250319
>generic|frv2_80879|Pisum_sativum_v2_Contig4418_1	frv2_80879	Pisum_sativum_v2_Contig4418_1 Subtilisin-like serine protease n=1 Tax=Medicago truncatula RepID=G7ID47_MEDTR (UniRef100_G7ID47 icov:93% qcovs:87.76% e-val:0)	protein.degradation.subtilases	1	3.03602	0.202403	0.108362	0.521241	0.0129302	0.0506701	0.389405	0.258594	0.237223	0.875374	0.00230695	0.0111434	7.28444	0.00087767	0.0521075	2.47783	0.473692	0.604079	0.486227	0.555534	0.588905	1.33829	0.286734	0.102696	X
>generic|frv2_88197|Pisum_sativum_v2_Contig8073_5	frv2_88197;frv2_50022;P13240	Pisum_sativum_v2_Contig8073_5 Disease resistance response protein 206 n=1 Tax=Pisum sativum RepID=DR206_PEA (UniRef100_P13240 icov:98% qcovs:100% e-val:2e-132)	stress.biotic.PR-proteins	1	1.27707	0.0524212	0.0469743	0.777361	0.00594794	0.0322486	0.780582	0.286605	0.245887	0.733287	0.000319358	0.00505252	2.83399	0.000480554	0.0485791	1.12266	0.837816	0.68666	0.937995	0.420362	0.560593	1.59375	0.0379445	0.0370348
>generic|frv2_112709|p.sativum_wa1_contig19548_5	frv2_112709;Q93ZN9;frv2_53254	p.sativum_wa1_contig19548_5 LL-diaminopimelate aminotransferase n=1 Tax=Medicago truncatula RepID=G7JTY4_MEDTR (UniRef100_G7JTY4 icov:96% qcovs:93.03% e-val:0)	amino acid metabolism.synthesis.aspartate family.lysine.LL-diaminopimelic acid aminotransferase	2	2.0216	6.71254e-05	0.00187202	2.85456	0.0192441	0.0619242	1.51123	0.0157917	0.0422906	1.04131	0.0661764	0.0646657	1.45539	0.0791923	0.369659	1.20365	0.770607	0.668923	1.22799	0.383513	0.560593	3.01931	0.00226293	0.00812116
>generic|carvalho41530|PsCam059444_1_AA	Q93VT8	PsCam059444_1_AA ATP-citrate synthase beta chain protein 1 OS=Oryza sativa subsp. japonica GN=ACLB-1 PE=2 SV=1 (sp	TCA / org transformation.other organic acid transformatons.atp-citrate lyase	2	1.62448	0.00755411	0.014667	2.33558	0.0307832	0.0776035	0.595364	0.164964	0.185744	0.637197	0.238807	0.134689	1.11698	0.507728	0.56904	0.981052	0.978357	0.720682	0.712817	0.399612	0.560593	1.70172	0.128673	0.0650062	X
>generic|carvalho14190|PsCam013953_1_AA	P26360;frv2_97108	PsCam013953_1_AA ATP synthase subunit gamma, mitochondrial OS=Ipomoea batatas GN=ATPC PE=1 SV=2 (sp	mitochondrial electron transport / ATP synthesis.F1-ATPase	2	1.2514	0.0235312	0.0297066	0.0529455	0.00364715	0.0240586	0.532606	0.00648403	0.0249705	0.980901	0.280967	0.151048	1.22455	0.0612882	0.343571	0.933016	0.858383	0.698318	0.769745	0.0960817	0.419114	1.44139	0.0116624	0.0210891
>generic|frv2_75314|Pisum_sativum_v2_Contig1014_5	frv2_75314;frv2_45835;frv2_95687;frv2_75318;frv2_1118;frv2_129769;frv2_45850;frv2_45843;frv2_94288;frv2_94090;frv2_1119;frv2_45831	Pisum_sativum_v2_Contig1014_5 Probable histone H2A.1 n=2 Tax=Medicago truncatula RepID=H2A1_MEDTR (UniRef100_Q2HU68 icov:94% qcovs:90.84% e-val:2e-76)	DNA.synthesis/chromatin structure.histone.core.H2A	2	2.14119	0.00593741	0.0133929	2.7941	0.426534	0.298912	0.643596	0.343928	0.262513	0.779127	0.00206196	0.0111345	2.22508	0.0212294	0.23317	2.01885	0.0730002	0.593758	1.10863	0.087691	0.415986	1.35215	0.0197304	0.027396
>generic|frv2_82267|Pisum_sativum_v2_Contig5109_1	frv2_82267;Q3SYZ6;frv2_14822	Pisum_sativum_v2_Contig5109_1 Uncharacterized protein n=1 Tax=Medicago truncatula RepID=G7J420_MEDTR (UniRef100_G7J420 icov:98% qcovs:94.08% e-val:0)	minor CHO metabolism.sugar kinases	2	7.5902	0.00223791	0.00980752	2.79231	0.422357	0.298912	0.380803	0.484209	0.290499	1.39123	0.116272	0.0900467	0.238601	0.0042372	0.120313	2.1271	0.43751	0.602515	1	0.0164662	0.215479	1.87643	0.273322	0.099934
>generic|frv2_120006|p.sativum_wa1_contig25399_4	frv2_120006;P93285	p.sativum_wa1_contig25399_4 Cytochrome c oxidase subunit 2 n=1 Tax=Gossypium hirsutum RepID=M1G317_GOSHI (UniRef100_M1G317 icov:90% qcovs:98.44% e-val:0)	mitochondrial electron transport / ATP synthesis.cytochrome c oxidase	2	2.14154	0.0126284	0.0196205	0.892733	0.315582	0.274241	0.334529	0.863036	0.383686	0.525359	0.74346	0.296377	3.31655	0.0138361	0.198137	0.901191	0.920278	0.714859	1.08299	0.373901	0.560593	1.89326	0.587985	0.171235
>generic|frv2_119108|p.sativum_wa1_contig24721_5	frv2_119108	p.sativum_wa1_contig24721_5 L-ascorbate peroxidase, cytosolic n=1 Tax=Pisum sativum RepID=APX1_PEA (UniRef100_P48534 icov:94% qcovs:100% e-val:0)	redox.ascorbate and glutathione.ascorbate	2	0.278168	0.00644937	0.0139714	5.10853	0.177333	0.220351	0.981947	0.098691	0.139268	0.489873	0.000563162	0.00677551	7.98632	0.000595084	0.0485791	1.00013	0.999898	0.729046	1.23075	0.347124	0.560593	0.629301	0.0882219	0.0549526	X
>generic|frv2_46651|franssen_28614_1	frv2_46651;frv2_46648;frv2_46795;frv2_46649;frv2_75224;Q9FLF0	franssen_28614_1 PREDICTED: 40S ribosomal protein S9-2-like n=1 Tax=Cicer arietinum RepID=UPI00032A4FED (UniRef100_UPI00032A4FED icov:96% qcovs:99.49% e-val:2e-140)	protein.synthesis.ribosomal protein.eukaryotic.40S subunit.S9	2	0.417152	0.0082656	0.0150039	2.09835	0.298035	0.270551	0.0891927	0.0817342	0.123222	1.33264	0.051149	0.056073	1.83759	0.0288841	0.25256	1.02187	0.963554	0.720682	1.67548	0.441937	0.560593	1.82667	0.49703	0.151956
>generic|carvalho12441|PsCam011264_1_AA	Q94CJ5;frv2_114592	PsCam011264_1_AA Protein RETICULATA-RELATED 4, chloroplastic OS=Arabidopsis thaliana GN=RER4 PE=2 SV=1 (sp	not assigned.unknown	2	7.54929	0.0023637	0.0099869	2.23187	0.225699	0.238213	0.193285	0.266626	0.238611	1.46075	1.07887e-05	0.00119481	0.957432	0.944722	0.692627	0.740714	0.785109	0.673028	1	0.342616	0.560593	1	0.269871	0.0989891
>generic|carvalho16318|PsCam020942_1_AA	Q6GQT9	PsCam020942_1_AA Nodal modulator 1 OS=Mus musculus GN=Nomo1 PE=1 SV=1 (sp	not assigned.unknown	2	3.1352	0.00666953	0.0141549	1.39597	0.205655	0.231123	0.804149	0.336239	0.259491	1.28764	0.528199	0.236507	0.643608	0.225699	0.474074	0.990425	0.987768	0.722595	0.7147	0.286714	0.560593	0.636568	0.0567894	0.0447011	X
>generic|frv2_55453|franssen_34479_2	frv2_55453;frv2_110738;Q39097	franssen_34479_2 PREDICTED: eukaryotic peptide chain release factor subunit 1-3-like n=1 Tax=Cicer arietinum RepID=UPI00032A7220 (UniRef100_UPI00032A7220 icov:91% qcovs:98.13% e-val:0)	protein.synthesis.release	2	2.2578	0.00219104	0.0097413	1.83315	0.508571	0.307869	0.0664477	0.908239	0.392956	0.723574	0.611898	0.261979	1.25421	0.374331	0.526865	1.94452	0.0135556	0.593758	3.77127	0.548004	0.584602	1.78244	0.0170735	0.025862
>generic|frv2_77653|Pisum_sativum_v2_Contig2608_2	frv2_77653	Pisum_sativum_v2_Contig2608_2 26S proteasome regulatory particle non-ATPase subunit 8 n=1 Tax=Medicago truncatula RepID=B7FLW2_MEDTR (UniRef100_B7FLW2 icov:98% qcovs:98.71% e-val:0)	protein.degradation.ubiquitin.proteasom	2	2.03441	0.0140531	0.0208266	0.975452	0.387105	0.291835	2.78371	0.732203	0.350304	0.804692	0.173767	0.11021	0.678731	0.0992173	0.378925	1.32473	0.670664	0.629304	0.946695	0.342436	0.560593	1.67626	0.0911173	0.0557782	X
>generic|frv2_49176|franssen_30239_2	frv2_49176;frv2_84859	franssen_30239_2 PREDICTED: isopentenyl-diphosphate Delta-isomerase I-like n=1 Tax=Cicer arietinum RepID=UPI00032AA9DF (UniRef100_UPI00032AA9DF icov:94% qcovs:84.62% e-val:2e-178)	secondary metabolism.isoprenoids.mevalonate pathway.isopentenyl pyrophosphate:dimethyllallyl pyrophosphate isomerase	2	2.02965	0.00500668	0.0123958	2.54552	0.466957	0.302738	0.783084	0.951355	0.403092	0.897521	0.627882	0.265509	0.938566	0.749892	0.638239	1.1859	0.733922	0.659356	1.08761	0.196866	0.517313	2.11641	0.135933	0.0677547
>generic|frv2_102228|p.sativum_wa1_contig10441_3	frv2_102228	p.sativum_wa1_contig10441_3 ATP synthase subunit alpha, mitochondrial n=2 Tax=Fabeae RepID=ATPAM_PEA (UniRef100_P05493 icov:95% qcovs:96.43% e-val:9e-171)	mitochondrial electron transport / ATP synthesis.F1-ATPase	2	0.464009	0.0393996	0.0393704	4.25883	0.105628	0.16415	0.893731	0.095813	0.13651	1.07704	0.00426325	0.0137516	1.05414	0.801943	0.653842	0.298906	0.178757	0.593758	0.705891	0.329285	0.560593	0.571679	0.181909	0.0775759	X
>generic|frv2_65589|franssen_40527_5	frv2_65589	franssen_40527_5 PREDICTED: outer envelope pore protein 16, chloroplastic-like n=1 Tax=Cicer arietinum RepID=UPI00032A611E (UniRef100_UPI00032A611E icov:79% qcovs:79.2% e-val:2e-63)	protein.targeting.chloroplast	2	0.374962	0.0261753	0.0306482	3.5303	0.0515668	0.11018	0.784679	0.114715	0.151767	1.05804	0.00366001	0.0129361	1.08074	0.75272	0.638239	0.139367	0.0631343	0.593758	0.772875	0.444749	0.560593	0.373732	0.014082	0.0235891	X
>generic|frv2_76175|Pisum_sativum_v2_Contig1671_5	frv2_76175;frv2_45778;frv2_45762;frv2_45770;frv2_45774;frv2_45768;frv2_45764;frv2_45780;frv2_45775;frv2_76177;Q39255	Pisum_sativum_v2_Contig1671_5 PREDICTED: SKP1-like protein 1A-like n=1 Tax=Cicer arietinum RepID=UPI00032ACF54 (UniRef100_UPI00032ACF54 icov:81% qcovs:88.57% e-val:4e-84)	protein.degradation.ubiquitin.E3.SCF.SKP	2	0.338943	0.00277494	0.0106127	2.03859	0.248117	0.249357	0.23548	0.248117	0.23311	0.865395	0.00277494	0.0113362	1	nan	nan	0.032678	0.160741	0.593758	0.556686	0.160741	0.48784	1.09977	0	0
>generic|carvalho29854|PsCam042495_1_AA	Q8C8U0	PsCam042495_1_AA Liprin-beta-1 OS=Mus musculus GN=Ppfibp1 PE=1 SV=3 (sp	not assigned.no ontology	2	0.38409	0.0259015	0.0306482	1.4387	0.418989	0.298912	0.848118	0.403084	0.2735	0.720178	1.03605e-05	0.00119481	0.873767	0.403413	0.544335	0.494959	0.498413	0.606728	1.06859	0.415287	0.560593	1.28801	0.480785	0.148154	X
>generic|carvalho14299|PsCam014095_1_AA	Q9SJT9;frv2_110976	PsCam014095_1_AA Coatomer subunit alpha-2 OS=Arabidopsis thaliana GN=At2g21390 PE=2 SV=1 (sp	cell.vesicle transport	2	0.414979	0.0453822	0.0433707	1.97585	0.218546	0.236404	0.0838802	0.128459	0.161357	0.56927	0.130108	0.0952131	1.18584	0.379527	0.527761	0.592337	0.585608	0.62084	0.994306	0.703487	0.628823	1.78392	0.483897	0.148721
>generic|frv2_80171|Pisum_sativum_v2_Contig4048_2	frv2_80171	Pisum_sativum_v2_Contig4048_2 Vicilin n=1 Tax=Pisum sativum RepID=VCLC_PEA (UniRef100_P13918 icov:100% qcovs:92.05% e-val:2e-48)	development.storage proteins	2	0.110318	0.00890071	0.0159079	1.14494	0.769539	0.366079	0.690414	0.352002	0.262513	0.394835	0.592985	0.25787	0.793028	0.176287	0.442581	1.95208	0.192811	0.593758	0.886697	0.163282	0.48784	2.12334	0.0551549	0.0440617	X
>generic|carvalho30661|PsCam044001_1_AA	P13708;frv2_16262	PsCam044001_1_AA Sucrose synthase OS=Glycine max GN=SS PE=1 SV=2 (sp	major CHO metabolism.degradation.sucrose.Susy	2	1	nan	nan	4.23974	0.0234567	0.0698044	0.0762601	0.00928465	0.0316785	0.829007	0.00492718	0.0147477	2.65804	0.00324359	0.105915	2.40946	0.139305	0.593758	0.249685	0.373901	0.560593	2.23828	0.176589	0.0762834
>generic|frv2_101619|p.sativum_wa1_contig09844_2	frv2_101619;frv2_49370	p.sativum_wa1_contig09844_2 PREDICTED: nuclear transport factor 2-like n=1 Tax=Cicer arietinum RepID=UPI00032A5258 (UniRef100_UPI00032A5258 icov:85% qcovs:92.68% e-val:2e-81)	protein.targeting.nucleus	2	0.995689	0.940938	0.321536	0.178664	0.00452616	0.0259626	0.859224	0.0153653	0.0417936	1.05961	0.115677	0.0900053	1.10567	0.525051	0.577267	0.64695	0.088901	0.593758	1.16045	0.0841943	0.408523	1.23321	0.579492	0.169397
>generic|carvalho19578|PsCam026142_1_AA	Q42699	PsCam026142_1_AA 5-methyltetrahydropteroyltriglutamate--homocysteine methyltransferase OS=Catharanthus roseus GN=METE PE=2 SV=1 (sp	amino acid metabolism.synthesis.aspartate family.methionine	2	1.04515	0.798894	0.289349	0.407073	0.0218508	0.0670418	0.495338	0.212736	0.214924	0.96025	0.672197	0.277428	1.05537	0.0659079	0.347118	1.26433	0.536879	0.613588	0.606443	0.468545	0.563553	2.31068	0.909401	0.233631	X
>generic|frv2_116395|p.sativum_wa1_contig22623_2	frv2_116395;frv2_52294	p.sativum_wa1_contig22623_2 Carboxylesterase n=1 Tax=Medicago truncatula RepID=A0A072UIY5_MEDTR (UniRef100_A0A072UIY5 icov:97% qcovs:83.02% e-val:0)	not assigned.no ontology	2	1.17424	0.697835	0.264243	0.11718	0.000226344	0.00526973	1.63134	0.000195391	0.00281478	1.81393	0.0124659	0.0239402	2.06126	0.029013	0.25256	0.865056	0.901332	0.711357	1.62058	0.394859	0.560593	2.0142	0.181508	0.0775465
>generic|carvalho20183|PsCam026969_1_AA	Q9LS40;frv2_113258	PsCam026969_1_AA Protein ASPARTIC PROTEASE IN GUARD CELL 1 OS=Arabidopsis thaliana GN=ASPG1 PE=1 SV=1 (sp	RNA.regulation of transcription.unclassified	2	1.33333	0.373901	0.168928	4.81562	0.000930374	0.0136383	0.116253	0.000746606	0.00653599	0.801283	0.000980465	0.0081437	0.88607	0.873265	0.674918	1.89796	0.385571	0.593758	0.991302	0.432114	0.560593	2.43419	0.01746	0.0259051
>generic|frv2_32087|franssen_18843_5	frv2_32087;frv2_90830;frv2_75039;frv2_32439;frv2_72304;frv2_71976;frv2_71255;frv2_72620;frv2_31083;frv2_70283;frv2_43253;frv2_41961;frv2_43586;frv2_42472;frv2_32054;frv2_38542;frv2_40019;frv2_71289;frv2_41618;frv2_69555	franssen_18843_5 Ribulose bisphosphate carboxylase small chain n=1 Tax=Lotus japonicus RepID=I3S8R8_LOTJA (UniRef100_I3S8R8 icov:100% qcovs:92.38% e-val:5e-66)	PS.calvin cycle.rubisco small subunit	2	2.97554	0.12733	0.0810413	2.87583	0.016955	0.0569763	0.248904	0.0126531	0.0375691	1.0681	0.00795894	0.0188515	1.23136	0.271076	0.490887	1.52289	0.396887	0.594506	0.483947	0.589589	0.59255	1.97715	0.021215	0.0278661
>generic|frv2_75237|Pisum_sativum_v2_Contig957_4	frv2_75237;frv2_75235;P21745	Pisum_sativum_v2_Contig957_4 PREDICTED: embryonic abundant protein VF30.1-like n=1 Tax=Cicer arietinum RepID=UPI00032A5D76 (UniRef100_UPI00032A5D76 icov:100% qcovs:81.41% e-val:1e-164)	stress.abiotic.drought/salt	2	0.422166	0.118588	0.0789144	6.52123	0.0234108	0.0698044	0.241913	0.0114197	0.0355344	0.316696	0.135745	0.0978301	3.60863	0.0716589	0.366727	0.978158	0.98236	0.721035	2.3713	0.373901	0.560593	2.14242	0.00206538	0.00768545
>generic|carvalho12722|PsCam011652_1_AA	Q0WW26;Q6Z382	PsCam011652_1_AA Coatomer subunit gamma OS=Arabidopsis thaliana GN=At4g34450 PE=1 SV=2 (sp	cell.vesicle transport	2	1.33333	0.373901	0.168928	3.84034	0.0466052	0.104215	0.213322	0.0193371	0.0491592	0.728185	0.00387821	0.0133343	1.64745	0.0785571	0.369659	0.881092	0.830941	0.685036	0.345558	0.0680355	0.38153	1	0.300914	0.106678
>generic|frv2_47399|franssen_29059_5	frv2_47399;P22241;frv2_116252;frv2_47401	franssen_29059_5 Uncharacterized protein n=1 Tax=Lotus japonicus RepID=I3T4F6_LOTJA (UniRef100_I3T4F6 icov:94% qcovs:85.29% e-val:0)	development.late embryogenesis abundant	2	1.21393	0.317628	0.150835	2.1908	0.00606493	0.0324385	0.953849	0.00232296	0.0129076	1.15046	0.0462314	0.0526021	1.08662	0.746876	0.638239	0.651013	0.201464	0.593758	0.646567	0.0253354	0.271758	3.89229	0.064062	0.0468457
>generic|frv2_111417|p.sativum_wa1_contig18341_6	frv2_111417	p.sativum_wa1_contig18341_6 Dolichyl-diphosphooligosaccharide--protein glycosyltransferase subunit 1 n=1 Tax=Medicago truncatula RepID=I3SBG9_MEDTR (UniRef100_I3SBG9 icov:94% qcovs:89.15% e-val:0)	protein.glycosylation	2	1.27654	0.290797	0.140265	2.11436	0.00399485	0.025141	1.70413	0.00451147	0.0192833	0.512642	0.499062	0.227133	1.04767	0.686061	0.6185	0.421097	0.176716	0.593758	1.46078	0.0914569	0.415986	1.08949	0.212327	0.0845217	X
>generic|frv2_80230|Pisum_sativum_v2_Contig4078_6	frv2_80230;frv2_49839	Pisum_sativum_v2_Contig4078_6 ATP synthase subunit beta, chloroplastic n=2 Tax=Pisum sativum RepID=ATPB_PEA (UniRef100_P05037 icov:99% qcovs:100% e-val:0)	PS.lightreaction.ATP synthase.beta subunit	2	1.65475	0.487143	0.202886	24.4754	0.0810809	0.141996	0.129919	0.0696949	0.112952	0.353791	0.00409558	0.0134724	3.10377	0.0251296	0.249253	0.382223	0.565668	0.618661	2.02208	0.374915	0.560593	5.21455	6.24708e-05	0.000971507
>generic|carvalho12092|PsCam010819_1_AA	O64407	PsCam010819_1_AA Beta-amylase OS=Vigna unguiculata GN=BMY1 PE=2 SV=1 (sp	major CHO metabolism.degradation.starch.starch cleavage.beta amylase	2	1	nan	nan	6.42277	0.12331	0.18076	19.3695	0.0792865	0.120623	0.923801	0.00139604	0.00966289	2.75552	0.00292503	0.10054	1.03496	0.96922	0.720682	1.62117	0.373901	0.560593	4.19115	0.00429346	0.011817	X
>generic|frv2_111055|p.sativum_wa1_contig17978_5	frv2_111055;frv2_5671	p.sativum_wa1_contig17978_5 Sucrose synthase n=1 Tax=Pisum sativum RepID=Q9T0M9_PEA (UniRef100_Q9T0M9 icov:99% qcovs:100% e-val:0)	major CHO metabolism.degradation.sucrose.Susy	2	0.29223	0.0727072	0.058851	9.9874	0.272491	0.261138	0.42723	0.200751	0.208781	0.816826	3.99708e-05	0.00189712	13.2246	0.00191173	0.0859285	1.365	0.768616	0.668073	1.91001	0.391389	0.560593	2.31456	0.25002	0.0942201
>generic|frv2_46274|franssen_28389_2	frv2_46274	franssen_28389_2 Alpha-glucan phosphorylase, H isozyme n=1 Tax=Vicia faba RepID=PHSH_VICFA (UniRef100_P53537 icov:96% qcovs:97.51% e-val:0)	major CHO metabolism.degradation.starch.starch phosphorylase	2	2.54506	0.149171	0.0890302	6.66719	0.23608	0.247192	0.914231	0.215444	0.215307	1.33005	0.0592802	0.0615473	2.99088	0.0156136	0.203936	4.32656	0.317063	0.593758	0.899811	0.166943	0.491211	0.893854	0.313905	0.10954	X
>generic|frv2_82946|Pisum_sativum_v2_Contig5445_5	frv2_82946;frv2_50073;Q0WRX3	Pisum_sativum_v2_Contig5445_5 Putative serine carboxypeptidase (Fragment) n=1 Tax=Pisum sativum RepID=Q9FEU4_PEA (UniRef100_Q9FEU4 icov:96% qcovs:99.16% e-val:0)	protein.degradation.serine protease	2	1	nan	nan	1.00187	0.0290309	0.0758765	0.134521	0.0242072	0.0557137	0.441994	0.220212	0.126579	5.79063	0.0172948	0.217207	1.05811	0.955434	0.720682	3.34614	0.373901	0.560593	2.29715	0.0344497	0.0350742
>generic|carvalho22579|PsCam030760_1_AA	Q9C5Z1;frv2_102293	PsCam030760_1_AA Eukaryotic translation initiation factor 3 subunit B OS=Arabidopsis thaliana GN=TIF3B1 PE=1 SV=1 (sp	protein.synthesis.initiation	2	1.14357	0.454587	0.193067	1.59288	0.325424	0.278789	2.3643	0.289172	0.246753	0.62824	0.121442	0.0919084	1.2028	0.0446373	0.3073	2.09532	0.000744358	0.163904	1.59546	0.896731	0.685443	3.42651	0.000936145	0.00532622
>generic|frv2_101038|p.sativum_wa1_contig09102_5	frv2_101038;frv2_101036;frv2_73062;O22584;frv2_40398	p.sativum_wa1_contig09102_5 Ribosomal protein S11 n=2 Tax=Medicago truncatula RepID=G7IPY3_MEDTR (UniRef100_G7IPY3 icov:84% qcovs:99.34% e-val:3e-103)	protein.synthesis.ribosomal protein.eukaryotic.40S subunit.S14	2	0.811583	0.161176	0.0925924	1.3916	0.793094	0.372804	3.18128	0.323472	0.255224	0.972257	0.984074	0.352907	1.01039	0.94761	0.692627	3.05818	0.026962	0.593758	1.90908	0.223697	0.544114	2.10361	0.0425242	0.0390537
>generic|frv2_46644|franssen_28610_1	frv2_46644	franssen_28610_1 Uncharacterized protein n=1 Tax=Lotus japonicus RepID=I3SG74_LOTJA (UniRef100_I3SG74 icov:95% qcovs:89% e-val:6e-134)	protein.synthesis.ribosomal protein.eukaryotic.40S subunit.S5	2	1.31254	0.0797503	0.0622159	0.644763	0.951632	0.411638	2.11041	0.119629	0.155621	0.908352	0.942101	0.34358	1.16106	0.061312	0.343571	2.95496	0.00817587	0.541925	1.27247	0.0638458	0.379772	1.78706	0.0257831	0.0300722	X
>generic|frv2_77736|Pisum_sativum_v2_Contig2654_5	frv2_77736;frv2_35789;frv2_34069	Pisum_sativum_v2_Contig2654_5 Uncharacterized protein n=1 Tax=Glycine max RepID=C6T670_SOYBN (UniRef100_C6T670 icov:93% qcovs:93.24% e-val:3e-94)	protein.synthesis.ribosomal protein.eukaryotic.60S subunit.L27A	2	1.26344	0.0580087	0.0502696	1.00895	0.713658	0.350013	1.3734	0.400331	0.27318	0.968004	0.668828	0.276725	1.20309	0.320579	0.50134	2.52226	0.028528	0.593758	1.05625	0.604379	0.595558	0.794747	0.0242435	0.0293021
>generic|frv2_74137|Pisum_sativum_v2_Contig222_5	frv2_74137	Pisum_sativum_v2_Contig222_5 Nodule-enhanced malate dehydrogenase n=1 Tax=Pisum sativum RepID=O81609_PEA (UniRef100_O81609 icov:88% qcovs:100% e-val:0)	TCA / org transformation.other organic acid transformatons.cyt MDH	2	1.30492	0.152011	0.0900454	0.00254925	0.813943	0.376643	0.645094	0.981377	0.41222	0.861979	0.0534095	0.0574261	1.21933	0.264246	0.490688	2.02259	0.00309422	0.340665	0.878138	0.225407	0.546244	0.761282	0.00112481	0.00596992	X
>generic|frv2_75360|Pisum_sativum_v2_Contig1047_4	frv2_75360	Pisum_sativum_v2_Contig1047_4 Legumin (Minor small) n=1 Tax=Pisum sativum RepID=O24294_PEA (UniRef100_O24294 icov:99% qcovs:92.97% e-val:0)	development.storage proteins	2	1.26666	0.139583	0.0859119	0.774049	0.225059	0.238173	1.36872	0.698003	0.343123	0.851906	0.0195321	0.0311986	0.679239	0.248652	0.483783	0.387582	0.0280082	0.593758	1.66294	0.211209	0.533575	1.43417	0.567711	0.167846	X
>generic|frv2_79176|Pisum_sativum_v2_Contig3512_3	frv2_79176	Pisum_sativum_v2_Contig3512_3 Late embryogenesis abundant protein, putative n=1 Tax=Medicago truncatula RepID=G7I9D0_MEDTR (UniRef100_G7I9D0 icov:99% qcovs:64.43% e-val:1e-140)	not assigned.unknown	3	0.572657	0.00283676	0.0106127	0.0355327	0.00326211	0.0222606	2.00365	5.09793e-05	0.0011664	0.919827	0.019411	0.0311549	0.739038	0.00183197	0.0859285	0.00938566	0.284811	0.593758	1.417	0.353996	0.560593	1.37378	3.18966e-05	0.000621712	X
>generic|frv2_76498|Pisum_sativum_v2_Contig1886_6	frv2_76498	Pisum_sativum_v2_Contig1886_6 PREDICTED: cysteine proteinase inhibitor 12-like n=1 Tax=Cicer arietinum RepID=UPI00032AC6D0 (UniRef100_UPI00032AC6D0 icov:99% qcovs:85.43% e-val:8e-151)	protein.degradation.cysteine protease	3	0.776879	0.0279758	0.0320231	0.178689	0.00205173	0.0166001	1.91748	0.000476255	0.00500659	1.05038	0.236256	0.133948	0.854697	0.0286929	0.25256	0.245454	0.370331	0.593758	0.95157	0.41907	0.560593	0.898602	0.0037292	0.0114462	X
>generic|frv2_110573|p.sativum_wa1_contig17032_6	frv2_110573	p.sativum_wa1_contig17032_6 Pathogenesis-related protein bet V I family protein n=1 Tax=Medicago truncatula RepID=G7L7T5_MEDTR (UniRef100_G7L7T5 icov:94% qcovs:77.27% e-val:1e-83)	stress.biotic	3	0.181426	0.00790298	0.0148737	0.798893	0.0339948	0.0820419	1.13038	0.373901	0.262513	0.719197	0.139061	0.0992807	3.70232	0.172585	0.442001	1	nan	nan	0.747239	0	0	0.642522	0.172585	0.0756299	X
>generic|frv2_54377|franssen_33785_2	frv2_54377;O95677;frv2_130651	franssen_33785_2 Uncharacterized protein n=1 Tax=Medicago truncatula RepID=I3S9D7_MEDTR (UniRef100_I3S9D7 icov:99% qcovs:86.16% e-val:0)	misc.acid and other phosphatases	3	0.328931	0.00514134	0.0125176	0.844991	0.0280576	0.0758765	0.55544	0.854462	0.382893	0.625228	0.0254983	0.0354456	0.750329	0.0864204	0.369659	0.664285	0.636588	0.627871	1.46379	0.200137	0.521719	2.44086	0.166615	0.0740284
>generic|carvalho6216|PsCam000847_1_AA	Q39846	PsCam000847_1_AA Seed biotin-containing protein SBP65 OS=Glycine max GN=SBP65 PE=2 SV=1	not assigned.unknown	3	0.594605	0.00405566	0.01155	0.340623	0.0286276	0.0758765	2.4246	0.0110582	0.0348213	1.01877	0.0238051	0.0342379	0.811991	0.0619195	0.343571	0.00967887	0.237537	0.593758	0.611501	0.631757	0.606723	0.68119	0.000320191	0.00268953	X
>generic|frv2_132767|p.sativum_wa1_contig33445_5	frv2_132767	p.sativum_wa1_contig33445_5 PREDICTED: late embryogenesis abundant protein B19.3-like n=1 Tax=Cicer arietinum RepID=UPI00032A9B5C (UniRef100_UPI00032A9B5C icov:94% qcovs:92.92% e-val:1e-63)	not assigned.unknown	3	0.557671	0.000575306	0.0071567	0.144253	0.0255925	0.0734007	1.36162	0.000368684	0.00409723	0.743997	0.082663	0.0722731	0.699875	0.0563097	0.334312	0.0188638	0.302785	0.593758	0.742637	0.313068	0.560593	0.920104	0.00280945	0.009498	X
>generic|carvalho36118|PsCam051486_1_AA	P13934	PsCam051486_1_AA Late embryogenesis abundant protein 76 OS=Brassica napus PE=2 SV=2 (sp	not assigned.unknown	3	0.683316	0.0150539	0.0218868	0.0282648	0.0189618	0.0615157	46.5131	0.000910824	0.00703186	1.12065	0.0830707	0.072439	0.698909	0.0799152	0.369659	0.0788629	0.227173	0.593758	1.05143	0.301169	0.560593	29.1541	0.000675944	0.00414942	X
>generic|carvalho10354|PsCam007366_1_AA	P28639;frv2_88170	PsCam007366_1_AA Dehydrin DHN1 OS=Pisum sativum GN=DHN1 PE=2 SV=1 (sp	not assigned.unknown	3	0.723892	0.0126637	0.0196205	0.304514	0.0109245	0.0445756	0.399066	0.000322052	0.00404081	1.26767	0.0361834	0.0440349	0.713276	0.0987866	0.378925	0.143087	0.329112	0.593758	1.13486	0.0772519	0.395802	1.58025	0.00200938	0.00768545
>generic|carvalho14795|PsCam015441_1_AA	P94533;frv2_129015	PsCam015441_1_AA Uncharacterized protein YsfE OS=Bacillus subtilis (strain 168) GN=ysfE PE=4 SV=1 (sp	Biodegradation of Xenobiotics.lactoylglutathione lyase	3	0.635869	0.00796262	0.0148946	0.420268	0.000205936	0.00509424	0.425188	0.0148184	0.0411697	1.42638	0.0165336	0.028168	1.05651	0.750571	0.638239	0.185712	0.346566	0.593758	2.23672	0.384367	0.560593	3.32655	0.000904499	0.00527483
>generic|carvalho23652|PsCam033673_1_AA	Q91XE8	PsCam033673_1_AA Transmembrane protein 205 OS=Mus musculus GN=Tmem205 PE=1 SV=1 (sp	not assigned.no ontology.late embryogenesis abundant domain-containing protein	3	0.628121	0.000780345	0.00772219	0.412789	0.0234439	0.0698044	1.40761	0.00156535	0.009598	0.886164	0.369692	0.186666	0.844499	0.293831	0.496739	0.24028	0.402971	0.597213	0.826473	0.515283	0.575265	1.52555	0.0214747	0.0278661	X
>generic|frv2_107701|p.sativum_wa1_contig14983_4	frv2_107701	p.sativum_wa1_contig14983_4 Pisum sativum 17.9 kDa heat shock protein (hsp17.9) (Fragment) n=1 Tax=Pisum sativum RepID=Q41028_PEA (UniRef100_Q41028 icov:97% qcovs:99.35% e-val:4e-107)	stress.abiotic.heat	3	0.618762	0.0495788	0.0462291	0.386237	0.0362078	0.085813	1.55728	0.0123849	0.0373429	0.809701	0.155683	0.104704	1.7381	0.171389	0.442001	0.319385	0.22741	0.593758	1.01745	0.785054	0.652691	1.6472	0.031118	0.0331457	X
>generic|frv2_75798|Pisum_sativum_v2_Contig1408_3	frv2_75798;Q9FGT8	Pisum_sativum_v2_Contig1408_3 Temperature-induced lipocalin n=1 Tax=Medicago truncatula RepID=Q38JC8_MEDTR (UniRef100_Q38JC8 icov:98% qcovs:90.22% e-val:9e-123)	transport.misc	3	0.724429	0.00200778	0.00933228	0.252002	0.0201561	0.0633147	1.51738	0.438568	0.278689	1.21973	0.793833	0.308174	0.941579	0.48648	0.563493	0.429379	0.264022	0.593758	1.97877	0.207192	0.529562	2.46936	0.0133855	0.0232192
>generic|frv2_22975|franssen_13586_2	frv2_22975;P27484	franssen_13586_2 Uncharacterized protein n=1 Tax=Glycine max RepID=I1LJ01_SOYBN (UniRef100_I1LJ01 icov:97% qcovs:68.79% e-val:1e-48)	RNA.regulation of transcription.GRP	3	0.715396	0.0261633	0.0306482	0.0780417	5.59684e-05	0.00276898	1.87414	0.000169859	0.00254109	1.03571	0.522326	0.235463	1.0185	0.872815	0.674918	0.465599	0.395055	0.594506	1.38272	0.762144	0.643607	2.09978	0.0400204	0.0380798
>generic|frv2_120944|p.sativum_wa1_contig26054_2	frv2_120944;frv2_88673;Q949U7	p.sativum_wa1_contig26054_2 PREDICTED: peroxiredoxin-2E, chloroplastic-like n=1 Tax=Cicer arietinum RepID=UPI00032A9F79 (UniRef100_UPI00032A9F79 icov:88% qcovs:93.09% e-val:4e-143)	redox.peroxiredoxin	3	0.554585	0.00453831	0.0121952	0.250969	0.00120425	0.0146722	0.758016	0.0145981	0.0410301	0.848177	0.481563	0.222214	0.949365	0.772183	0.646528	0.551051	0.208821	0.593758	1.70405	0.644956	0.606723	2.37226	0.0270393	0.0310534
>generic|frv2_79090|Pisum_sativum_v2_Contig3465_1	frv2_79090;frv2_42540	Pisum_sativum_v2_Contig3465_1 Actin-related protein 4A n=5 Tax=Papilionoideae RepID=G7IL85_MEDTR (UniRef100_G7IL85 icov:99% qcovs:99.73% e-val:0)	cell.organisation	3	0.825865	0.0128902	0.0197718	0.351025	0.00162813	0.016423	2.40337	0.00329092	0.0160004	0.648652	0.681496	0.278437	0.972262	0.813549	0.658372	0.634475	0.390804	0.594506	1.32407	0.189786	0.508929	2.28504	0.0805083	0.0530515
>generic|carvalho29660|PsCam042218_1_AA	P53492	PsCam042218_1_AA Actin-7 OS=Arabidopsis thaliana GN=ACT7 PE=1 SV=1 (sp	cell.organisation.cytoskeleton.actin.Actin	3	0.769558	0.00377959	0.01155	0.346922	0.0010624	0.0137821	1.25272	0.00292698	0.0150527	0.776219	0.333205	0.171367	0.965786	0.842442	0.666991	0.715128	0.60901	0.621285	0.833702	0.234806	0.549017	0.585184	0.186392	0.0782763	X
>generic|frv2_75353|Pisum_sativum_v2_Contig1036_1	frv2_75353;frv2_95727;frv2_75351;frv2_43528;frv2_71793;frv2_5251;frv2_33510;frv2_33739	Pisum_sativum_v2_Contig1036_1 PREDICTED: 60S ribosomal protein L21-1-like n=1 Tax=Cicer arietinum RepID=UPI00032ABC50 (UniRef100_UPI00032ABC50 icov:94% qcovs:98.17% e-val:4e-113)	protein.synthesis.ribosomal protein.eukaryotic.60S subunit.L21	3	0.772978	0.0174191	0.0242895	0.297585	0.0124757	0.0493779	0.592268	0.00665573	0.025134	1.16231	0.0619886	0.0627839	1.10196	0.193238	0.442581	0.815286	0.790742	0.674149	0.40235	0.0938457	0.416022	0.688312	0.084755	0.0545452
>generic|carvalho8695|PsCam004846_1_AA	P08927;frv2_47649;frv2_111513	PsCam004846_1_AA RuBisCO large subunit-binding protein subunit beta, chloroplastic OS=Pisum sativum PE=1 SV=2 (sp	PS.calvin cycle.rubisco interacting	3	0.734724	0.00531514	0.0126398	0.101363	0.00134174	0.0147514	0.526488	0.0042735	0.0188888	0.603121	0.476165	0.220691	1.0902	0.124896	0.407256	0.852428	0.638511	0.627871	0.357386	0.398653	0.560593	0.570895	0.87281	0.227332
>generic|frv2_81699|Pisum_sativum_v2_Contig4826_2	frv2_81699;frv2_47916;P52417;frv2_47918	Pisum_sativum_v2_Contig4826_2 Glucose-1-phosphate adenylyltransferase n=1 Tax=Pisum sativum RepID=Q43815_PEA (UniRef100_Q43815 icov:98% qcovs:99.81% e-val:0)	major CHO metabolism.synthesis.starch.AGPase	3	0.827066	0.0169531	0.0240774	0.349871	0.000761031	0.0126948	2.34725	0.000510858	0.00522902	1.08199	0.00189334	0.0110358	0.768376	0.0521946	0.316337	1.01392	0.941284	0.718841	1.67483	0.0262833	0.277377	1.45771	0.394532	0.128179
>generic|frv2_48939|franssen_30075_1	frv2_48939;frv2_83328	franssen_30075_1 PREDICTED: quinone oxidoreductase PIG3-like n=1 Tax=Cicer arietinum RepID=UPI00032A4F24 (UniRef100_UPI00032A4F24 icov:97% qcovs:89.23% e-val:0)	misc.misc2	3	0.850339	0.0103582	0.0174593	0.404625	0.0103544	0.0426897	0.776362	0.00618539	0.0240587	1.07934	0.362427	0.183835	0.864405	0.315643	0.50134	1.06003	0.85334	0.69679	0.756345	0.0431825	0.317468	0.903285	0.0421883	0.0389816
>generic|frv2_113344|p.sativum_wa1_contig20145_4	frv2_113344	p.sativum_wa1_contig20145_4 Translation elongation factor EF1B, gamma chain n=3 Tax=Medicago truncatula RepID=A0A072USZ0_MEDTR (UniRef100_A0A072USZ0 icov:99% qcovs:84.52% e-val:0)	protein.synthesis.elongation	3	0.822493	0.0471469	0.0444986	0.492449	0.0251313	0.0732351	0.918663	0.242845	0.229822	1.35305	0.0639175	0.0632956	1.03617	0.530729	0.578654	1.22912	0.503678	0.606728	1.17218	0.0190817	0.23121	1.73827	0.116646	0.0618412	X
>generic|frv2_46469|franssen_28503_3	frv2_46469	franssen_28503_3 Translation elongation factor EF-2 subunit n=1 Tax=Medicago truncatula RepID=G7IH33_MEDTR (UniRef100_G7IH33 icov:100% qcovs:97.46% e-val:0)	protein.synthesis.elongation	3	0.43208	0.0051065	0.0125176	1.57929	0.817699	0.376763	0.730876	0.0019094	0.0109217	0.588463	0.0561822	0.0600189	1.35348	0.02914	0.25256	0.41318	0.284126	0.593758	0.972696	0.672165	0.615149	1.96915	0.00759823	0.0167212	X
>generic|frv2_43452|franssen_26643_2	frv2_43452;frv2_38071	franssen_26643_2 Nascent polypeptide-associated complex subunit beta n=2 Tax=Medicago truncatula RepID=B7FMW7_MEDTR (UniRef100_B7FMW7 icov:83% qcovs:94.87% e-val:2e-100)	RNA.regulation of transcription.General Transcription	3	1.49352	0.0137053	0.0205093	0.534303	0.796622	0.373132	1.61251	0.375431	0.262587	1.57658	0.789334	0.307441	0.744151	0.378374	0.527761	0.178358	0.044278	0.593758	0.535752	0.637535	0.606723	0.711751	0.0146636	0.0242595
>generic|frv2_75529|Pisum_sativum_v2_Contig1198_4	frv2_75529;frv2_75531;frv2_36893;Q02610	Pisum_sativum_v2_Contig1198_4 Superoxide dismutase [Cu-Zn], chloroplastic n=1 Tax=Pisum sativum RepID=SODCP_PEA (UniRef100_P11964 icov:86% qcovs:85.43% e-val:5e-106)	redox.dismutases and catalases	3	0.599674	0.037873	0.0383975	1.13374	0.25424	0.253129	0.640445	0.991263	0.413436	2.41948	0.699736	0.283857	0.972039	0.744654	0.638239	0.191079	0.0144961	0.593758	0.818932	0.15156	0.48784	0.61189	0.00832401	0.0176522
>generic|frv2_52936|franssen_32834_3	frv2_52936;frv2_80434	franssen_32834_3 Superoxide dismutase [Mn], mitochondrial n=1 Tax=Pisum sativum RepID=SODM_PEA (UniRef100_P27084 icov:94% qcovs:97.08% e-val:1e-165)	redox.dismutases and catalases	3	0.740517	0.00205707	0.00941868	0.190862	0.662858	0.34243	0.826471	0.998971	0.415127	0.935479	0.216161	0.125117	0.904975	0.192834	0.442581	0.324851	0.0326621	0.593758	0.64577	0.546516	0.584602	0.527721	0.0159225	0.0250963
>generic|carvalho26091|PsCam036921_1_AA	Q42971;frv2_120712	PsCam036921_1_AA Enolase OS=Oryza sativa subsp. japonica GN=ENO1 PE=1 SV=2 (sp	glycolysis.cytosolic branch.enolase	3	0.352201	0.00870741	0.0157129	1.54464	0.995744	0.421506	0.167689	0.00385157	0.0177083	0.411909	0.826321	0.315896	0.990969	0.941314	0.692282	0.447616	0.130298	0.593758	1.68675	0.456591	0.563553	2.5185	0.00362234	0.0114187
>generic|frv2_59763|franssen_37111_4	frv2_59763;frv2_123524;Q8L8T2	franssen_37111_4 Glutaredoxin C1 n=1 Tax=Medicago truncatula RepID=G7J5D7_MEDTR (UniRef100_G7J5D7 icov:75% qcovs:85.04% e-val:5e-74)	redox.glutaredoxins	3	0.379232	0.000481343	0.00671194	1.35141	0.667387	0.34247	0.94488	0.769665	0.359818	1.01418	0.00213816	0.0111345	0.900805	0.551002	0.582012	0.169743	0.308765	0.593758	1.62485	0.594987	0.59255	3.45111	0.00192888	0.00768545
>generic|frv2_130435|p.sativum_wa1_contig32094_6	frv2_130435	p.sativum_wa1_contig32094_6 Convicilin (Fragment) n=1 Tax=Pisum sativum var. pumilio RepID=B0BCJ4_PEA (UniRef100_B0BCJ4 icov:95% qcovs:98.63% e-val:2e-149)	development.storage proteins	3	0.0775959	0.0113504	0.0186202	1.25447	0.86819	0.390481	0.956374	0.301378	0.251223	0.897592	0.0919985	0.0775772	1.57084	0.190438	0.442581	0.151855	0.373901	0.593758	0.723156	0.919661	0.691797	0.736897	0.0161161	0.025231	X
>generic|frv2_75800|Pisum_sativum_v2_Contig1409_1	frv2_75800;frv2_49397	Pisum_sativum_v2_Contig1409_1 Temperature induced lipocalin n=1 Tax=Medicago sativa subsp. falcata RepID=W0G592_MEDSF (UniRef100_W0G592 icov:94% qcovs:85.88% e-val:2e-102)	transport.misc	3	0.48363	2.68224e-05	0.00117548	1.24179	0.308669	0.272853	0.569215	0.36975	0.262513	1.19104	0.77172	0.302709	0.929631	0.639779	0.613214	0.444	0.427753	0.600818	1.01245	0.149573	0.48784	1.97794	0.0206005	0.0276177
>generic|frv2_135870|p.sativum_wa1_contig35162_3	frv2_135870	p.sativum_wa1_contig35162_3 Seed maturation protein PM39, putative n=1 Tax=Medicago truncatula RepID=A0A072U9M9_MEDTR (UniRef100_A0A072U9M9 icov:91% qcovs:65.52% e-val:1e-22)	not assigned.unknown	3	0.494779	0.00644615	0.0139714	0.847077	0.570298	0.327239	0.633772	0.954026	0.403784	0.72638	0.193664	0.1172	1.20556	0.638074	0.613214	0.360512	0.373901	0.593758	0.657867	0.529504	0.577495	1.47708	0.0476189	0.0417597	X
>generic|carvalho41048|PsCam058802_1_AA	Q96P47	PsCam058802_1_AA Arf-GAP with GTPase, ANK repeat and PH domain-containing protein 3 OS=Homo sapiens GN=AGAP3 PE=1 SV=2 (sp	not assigned.unknown	3	0.499873	0.0124849	0.0196205	0.47765	0.0997635	0.157943	1.12796	0.0582924	0.100771	1.00789	0.0285641	0.0381129	0.639459	0.111754	0.391612	0.169352	0.351663	0.593758	0.715315	0.192066	0.510574	0.989891	0.0162578	0.0252832	X
>generic|frv2_71098|franssen_43949_1	frv2_71098;P42654;frv2_85298	franssen_43949_1 14-3-3-like protein B n=1 Tax=Vicia faba RepID=1433B_VICFA (UniRef100_P42654 icov:98% qcovs:100% e-val:0)	signalling.14-3-3 proteins	3	0.481079	0.00386509	0.01155	2.02055	0.619146	0.33776	1.25714	0.136768	0.168879	1.64144	0.309457	0.163352	1.2255	0.228387	0.476528	0.615912	0.487511	0.606728	0.650599	0.845383	0.672875	0.774006	0.185792	0.0782307
>generic|frv2_76491|Pisum_sativum_v2_Contig1882_6	frv2_76491;frv2_46842;frv2_2673;P60039	Pisum_sativum_v2_Contig1882_6 60S ribosomal protein L7 n=2 Tax=Medicago truncatula RepID=A0A072VPV6_MEDTR (UniRef100_A0A072VPV6 icov:99% qcovs:97.54% e-val:4e-173)	protein.synthesis.ribosomal protein.eukaryotic.60S subunit.L7	3	0.309633	0.00273044	0.0106127	1.61445	0.895178	0.396758	0.237335	0.00157927	0.009598	0.524142	0.616177	0.263034	1.19705	0.319646	0.50134	1.02718	0.972264	0.720682	1.361	0.0344314	0.30986	2.14801	0.0913679	0.0557782
>generic|frv2_78293|Pisum_sativum_v2_Contig2999_5	frv2_78293;frv2_58620	Pisum_sativum_v2_Contig2999_5 Pyruvate kinase n=1 Tax=Medicago truncatula RepID=A0A072U4Q0_MEDTR (UniRef100_A0A072U4Q0 icov:98% qcovs:96.08% e-val:0)	glycolysis.cytosolic branch.pyruvate kinase (PK)	3	0.494776	0.00117858	0.00796634	0.710866	0.16408	0.210849	0.6644	0.36626	0.262513	1.36983	0.00629763	0.0167385	1.02071	0.858519	0.670665	1.57006	0.496375	0.606728	1.23417	0.00824947	0.158756	1.79107	0.155787	0.071589
>generic|frv2_94810|CD859631_1	frv2_94810	CD859631_1 LegA class n=1 Tax=Pisum sativum RepID=Q9T0P5_PEA (UniRef100_Q9T0P5 icov:95% qcovs:95.69% e-val:2e-134)	not assigned.unknown	3	0.0719003	0.00399099	0.01155	0.0805201	0.191178	0.227228	1.77839	0.595393	0.313575	1.27372	0.00262448	0.0113362	1.34504	0.436561	0.553218	1.70958	0.295858	0.593758	1.1643	0.108133	0.442202	0.716574	0.0458372	0.0410404	X
>generic|carvalho28686|PsCam040483_1_AA	C6T0L2	PsCam040483_1_AA Protein SLE3 OS=Glycine max GN=SLE3 PE=2 SV=1 (sp	hormone metabolism.abscisic acid.induced-regulated-responsive-activated	3	0.803365	0.0512915	0.0469142	0.098179	0.0153814	0.0555532	1.00356	6.95226e-05	0.0015023	0.927515	0.06416	0.0632956	0.595255	0.0578985	0.340648	0.00329758	0.32384	0.593758	0.872206	0.79037	0.653281	0.51516	0.00205556	0.00768545	X
>generic|frv2_123996|p.sativum_wa1_contig28123_5	frv2_123996;Q9LDA7	p.sativum_wa1_contig28123_5 Phosphatase 2C family protein n=2 Tax=Medicago truncatula RepID=A0A072TQN5_MEDTR (UniRef100_A0A072TQN5 icov:100% qcovs:93.38% e-val:0)	protein.postranslational modification	3	0.822212	0.2174	0.113809	0.377022	0.0267126	0.0739347	0.485406	0.0412375	0.0801985	1.20416	0.270656	0.146453	0.866698	0.212292	0.468386	0.19823	0.40693	0.597213	0.825295	0.655476	0.60921	1.81689	0.00515677	0.013516
>generic|frv2_128555|p.sativum_wa1_contig31008_6	frv2_128555	p.sativum_wa1_contig31008_6 Late embryogenesis abundant D-like protein n=2 Tax=Medicago truncatula RepID=G7IDP3_MEDTR (UniRef100_G7IDP3 icov:89% qcovs:89.29% e-val:2e-71)	development.late embryogenesis abundant	3	0.957029	0.451972	0.192573	0.238222	6.93336e-05	0.00282192	1.52083	8.48199e-05	0.00164227	1.05166	0.836043	0.317432	0.720656	0.023298	0.243399	0.280447	0.273817	0.593758	0.749108	0.317018	0.560593	0.971134	0.000194519	0.00226878	X
>generic|carvalho29484|PsCam041842_1_AA	B0S2A3	PsCam041842_1_AA V-type ATP synthase subunit F OS=Finegoldia magna (strain ATCC 29328) GN=atpF PE=3 SV=1 (sp	not assigned.unknown	3	0.888319	0.319673	0.151255	0.445226	0.0287702	0.0758765	0.394773	4.24372e-06	0.000412658	0.863959	0.0326162	0.0405855	0.764151	0.231745	0.479661	0.284204	0.273111	0.593758	0.47829	0.373795	0.560593	0.31971	0.00210857	0.00768545	X
>generic|carvalho27903|PsCam039249_1_AA	Q42980;frv2_74053	PsCam039249_1_AA Oleosin 16 kDa OS=Oryza sativa subsp. japonica GN=OLE16 PE=2 SV=2 (sp	lipid metabolism.TAG synthesis	3	0.893772	0.148189	0.0886163	0.0515291	0.00082849	0.0127487	0.925399	1.81779e-05	0.000876693	1.02064	0.244153	0.13656	0.899301	0.529218	0.578654	0.298886	0.354913	0.593758	0.845937	0.219726	0.543696	1.82321	0.00359588	0.0114187
>generic|carvalho30423|PsCam043435_1_AA	Q84V25	PsCam043435_1_AA 2-methylene-furan-3-one reductase OS=Fragaria ananassa GN=EO PE=1 SV=1 (sp	misc.oxidases - copper, flavone etc	3	0.827586	0.0936265	0.0675811	0.176669	0.00151658	0.0162229	0.94509	0.00725819	0.0266334	0.938421	0.0128691	0.0244321	1.0656	0.659441	0.613885	0.428037	0.355068	0.593758	0.890353	0.974046	0.698824	1.1366	0.0104413	0.0199642	X
>generic|frv2_72295|franssen_44751_6	frv2_72295;frv2_43532;frv2_77443;frv2_34610;frv2_39057;frv2_34425;frv2_36940;frv2_36907;frv2_34602	franssen_44751_6 Non-specific lipid-transfer protein 2 n=1 Tax=Lens culinaris RepID=NLTP2_LENCU (UniRef100_A0AT29 icov:100% qcovs:78.99% e-val:8e-58)	lipid metabolism.lipid transfer proteins etc	3	0.894294	0.333322	0.156113	0.308449	0.000769786	0.0126948	1.40628	0.000933301	0.00703186	2.00436	0.0778642	0.0698357	0.746598	0.257964	0.486906	0.428167	0.345478	0.593758	1.39172	0.0244632	0.271758	1.58863	0.0175462	0.0259051
>generic|carvalho28110|PsCam039563_1_AA	O26373;frv2_137001	PsCam039563_1_AA UPF0098 protein MTH_273 OS=Methanothermobacter thermautotrophicus (strain ATCC 29096 / DSM 1053 / JCM 10044 / NBRC 100330 / Delta H) GN=MTH_273 PE=3 SV=1 (sp	not assigned.no ontology	3	0.827103	0.0878891	0.0648122	0.258755	0.000115497	0.00351637	0.609657	0.00078095	0.00660343	1.287	0.0450493	0.0516107	0.950819	0.421659	0.547231	0.447525	0.475821	0.604579	0.478257	0.460247	0.563553	0.537296	0.00573737	0.0137975
>generic|frv2_97876|p.sativum_wa1_contig06022_4	frv2_97876	p.sativum_wa1_contig06022_4 PREDICTED: 1-Cys peroxiredoxin-like isoform X1 n=1 Tax=Cicer arietinum RepID=UPI00032A966C (UniRef100_UPI00032A966C icov:95% qcovs:93.58% e-val:2e-149)	redox.peroxiredoxin.PER1	3	0.92547	0.200615	0.10797	0.135179	0.000144655	0.00408953	1.17401	0.000255086	0.00330727	0.770481	0.098249	0.0807477	0.902337	0.473015	0.563493	0.452206	0.412995	0.599086	0.918001	0.417344	0.560593	1.25201	0.00430593	0.011817	X
>generic|frv2_107371|p.sativum_wa1_contig14727_6	frv2_107371	p.sativum_wa1_contig14727_6 Heat shock protein n=1 Tax=Pisum sativum RepID=Q8H1A6_PEA (UniRef100_Q8H1A6 icov:98% qcovs:97.47% e-val:6e-105)	stress.abiotic.heat	3	0.861325	0.230369	0.117784	0.370906	0.0017999	0.0165672	0.901473	0.00306572	0.0150942	1.142	0.0428633	0.0497931	1.08924	0.538598	0.578654	0.527213	0.332512	0.593758	0.69555	0.681679	0.617974	1.0886	0.0508845	0.0427161	X
>generic|frv2_64041|franssen_39635_1	frv2_64041;frv2_77906;frv2_102084	franssen_39635_1 PREDICTED: glycine-rich RNA-binding, abscisic acid-inducible protein-like n=1 Tax=Cicer arietinum RepID=UPI00032ACB1E (UniRef100_UPI00032ACB1E icov:54% qcovs:93.26% e-val:1e-51)	RNA.RNA binding	3	0.842864	0.240788	0.120109	0.302354	0.0266409	0.0739347	23.4242	0.121199	0.1557	0.82109	0.191308	0.116275	0.742915	0.0886328	0.371049	0.550243	0.507109	0.606728	1.45818	0.218299	0.543696	2.89119	0.268451	0.0989285
>generic|carvalho30427|PsCam043442_1_AA	Q9XHS0;frv2_75096;frv2_75102;frv2_75094;frv2_47597;frv2_95463;frv2_75097;frv2_75100;frv2_107979	PsCam043442_1_AA 40S ribosomal protein S12 OS=Hordeum vulgare GN=RPS12 PE=2 SV=1 (sp	protein.synthesis.ribosomal protein.eukaryotic.40S subunit.S12	3	1.01935	0.800479	0.289535	0.178349	0.000363731	0.00757694	0.395314	0.00168966	0.0101109	0.850876	0.125829	0.0945807	0.971487	0.854791	0.670071	0.576814	0.452087	0.602515	0.667414	0.288601	0.560593	0.784337	0.0225439	0.0284131
>generic|frv2_86483|Pisum_sativum_v2_Contig7218_2	frv2_86483	Pisum_sativum_v2_Contig7218_2 NAD(P)-binding rossmann-fold protein n=2 Tax=Medicago truncatula RepID=Q2HTL8_MEDTR (UniRef100_Q2HTL8 icov:98% qcovs:89.08% e-val:0)	misc.short chain dehydrogenase/reductase (SDR)	3	0.836148	0.084662	0.0641282	0.0419129	7.72608e-05	0.00282192	1.29868	9.28886e-05	0.00164227	1.19631	0.0468077	0.052725	0.876403	0.365318	0.52509	0.612885	0.4875	0.606728	1.19623	0.0531549	0.337934	0.943893	0.00728661	0.0163438	X
>generic|frv2_88007|Pisum_sativum_v2_Contig7976_2	frv2_88007	Pisum_sativum_v2_Contig7976_2 Putative oleosin n=1 Tax=Trifolium repens RepID=F6J041_TRIRP (UniRef100_F6J041 icov:89% qcovs:69.12% e-val:2e-89)	lipid metabolism.TAG synthesis	3	1.01716	0.695789	0.263843	0.463918	0.00957547	0.04211	2.83483	0.000976247	0.00703186	0.885689	0.257335	0.141316	0.935531	0.699556	0.622802	0.651014	0.645371	0.627871	1.19472	0.140331	0.482694	1.5062	0.111872	0.0608461	X
>generic|frv2_71010|franssen_43875_3	frv2_71010;frv2_88998;frv2_39187;frv2_41543;frv2_40065;frv2_31399;frv2_31442;frv2_35320	franssen_43875_3 RNA-binding (RRM/RBD/RNP motif) family protein n=1 Tax=Medicago truncatula RepID=G7JHA8_MEDTR (UniRef100_G7JHA8 icov:46% qcovs:94.19% e-val:2e-51)	RNA.RNA binding	3	0.909229	0.62738	0.244242	0.12609	0.00165718	0.016423	0.932665	0.0198044	0.049379	0.742962	0.141657	0.0994181	0.911075	0.627356	0.611957	0.684114	0.510703	0.60777	0.949986	0.302645	0.560593	1.29005	0.057348	0.0447417
>generic|frv2_75278|Pisum_sativum_v2_Contig988_6	frv2_75278;frv2_48124;frv2_75282	Pisum_sativum_v2_Contig988_6 Ribosomal L22e family protein n=1 Tax=Medicago truncatula RepID=G7KXJ9_MEDTR (UniRef100_G7KXJ9 icov:93% qcovs:96.77% e-val:5e-81)	protein.synthesis.ribosomal protein.eukaryotic.60S subunit.L22	3	0.917245	0.192235	0.104561	0.45391	0.0154395	0.0555532	0.40322	0.205339	0.211651	0.757411	0.0233921	0.0341764	0.781306	0.279856	0.494969	0.697005	0.57946	0.62084	0.317204	0.263596	0.560593	0.427157	0.274374	0.100162
>generic|frv2_79037|Pisum_sativum_v2_Contig3434_2	frv2_79037;frv2_105004	Pisum_sativum_v2_Contig3434_2 Short-chain dehydrogenase/reductase n=1 Tax=Medicago truncatula RepID=G7JI03_MEDTR (UniRef100_G7JI03 icov:94% qcovs:87.07% e-val:0)	misc.short chain dehydrogenase/reductase (SDR)	3	0.954297	0.601313	0.238328	0.12514	2.0935e-05	0.00204807	1.78821	0.000227355	0.00315828	1.12589	0.313792	0.164958	0.977517	0.683963	0.6185	0.704108	0.610297	0.621285	0.609761	0.144479	0.485331	0.633129	0.0167203	0.0256602
>generic|carvalho13058|PsCam012218_1_AA	Q9XEX2	PsCam012218_1_AA Peroxiredoxin-2B OS=Arabidopsis thaliana GN=PRXIIB PE=1 SV=1 (sp	redox.peroxiredoxin	3	0.8409	0.0740539	0.0596264	0.322318	0.00100707	0.0137464	0.762248	0.000357099	0.00408778	1.02393	0.178196	0.111285	0.864216	0.362096	0.524335	0.706144	0.46478	0.602515	1.07131	0.104168	0.432987	0.534061	0.0478613	0.0418151	X
>generic|frv2_110898|p.sativum_wa1_contig17824_6	frv2_110898;frv2_12060	p.sativum_wa1_contig17824_6 Pyruvate kinase n=1 Tax=Medicago truncatula RepID=A0A072VP40_MEDTR (UniRef100_A0A072VP40 icov:97% qcovs:93.92% e-val:0)	glycolysis.cytosolic branch.pyruvate kinase (PK)	3	0.968637	0.614022	0.241258	0.448538	0.031957	0.0800528	1.29026	0.00895969	0.0308403	1.10608	0.00067236	0.00677551	0.935652	0.25222	0.484464	1.10185	0.860101	0.698499	1.2365	0.0943989	0.416022	1.32149	0.115955	0.0618412
>generic|carvalho6874|PsCam001957_1_AA	P46519;frv2_98572;frv2_46382;frv2_94765;frv2_98574	PsCam001957_1_AA Desiccation protectant protein Lea14 homolog OS=Glycine max PE=2 SV=1 (sp	development.late embryogenesis abundant	3	0.851502	0.0799065	0.0622159	0.335342	0.000326255	0.00717385	0.462244	0.000254338	0.00330727	0.62022	0.00462184	0.0144864	0.841751	0.094656	0.378925	0.873689	0.829736	0.685036	1.38214	0.122927	0.462256	0.917132	0.0825024	0.0534594
>generic|carvalho35078|PsCam050134_1_AA	Q9SJ66	PsCam050134_1_AA Probable sucrose-phosphatase 2 OS=Arabidopsis thaliana GN=SPP2 PE=2 SV=2 (sp	major CHO metabolism.synthesis.sucrose.SPP	3	1.02538	0.649134	0.24861	0.0969814	0.000645534	0.0116135	0.788508	0.000547167	0.00532064	1.25867	0.149274	0.101628	0.882298	0.0856149	0.369659	0.990798	0.97438	0.720682	0.776872	0.0626871	0.3763	0.731123	0.0272557	0.0310534	X
>generic|frv2_98984|p.sativum_wa1_contig07187_4	frv2_98984;frv2_98986;frv2_115584;frv2_76807	p.sativum_wa1_contig07187_4 Alcohol dehydrogenase 1 n=1 Tax=Pisum sativum RepID=ADH1_PEA (UniRef100_P12886 icov:93% qcovs:98.95% e-val:0)	fermentation.ADH	3	1.08566	0.348626	0.161067	0.419874	0.00295653	0.0205293	0.720939	0.00245727	0.0132747	0.696175	0.963128	0.348503	0.841905	0.0784638	0.369659	1.65522	0.272508	0.593758	0.770569	0.00218131	0.0892032	1.78801	0.308542	0.108722
>generic|frv2_119153|p.sativum_wa1_contig24755_6	frv2_119153;A0L2D7;frv2_16334	p.sativum_wa1_contig24755_6 Calcium-binding EF-hand protein n=1 Tax=Medicago truncatula RepID=A0A072UNG4_MEDTR (UniRef100_A0A072UNG4 icov:96% qcovs:87.04% e-val:0)	signalling.calcium	3	0.887058	0.229566	0.11757	0.468176	7.87839e-05	0.00282192	0.755767	0.000428738	0.00463227	0.942308	0.169128	0.108686	0.893176	0.00582615	0.146787	0.716222	0.594582	0.62084	1.05597	0.686385	0.617974	1.20373	0.0347328	0.0350742
>generic|frv2_48720|franssen_29928_6	frv2_48720;Q94AP0;frv2_102567	franssen_29928_6 Allantoinase n=1 Tax=Medicago truncatula RepID=UPI0002360F6D (UniRef100_UPI0002360F6D icov:99% qcovs:90.32% e-val:0)	nucleotide metabolism.degradation	3	1.22958	0.146347	0.0878572	1.69409	0.464964	0.302738	0.75486	0.821108	0.373541	1.13304	0.748226	0.296377	0.65897	0.0279658	0.25256	0.293463	0.0153561	0.593758	0.692375	0.158947	0.48784	0.953041	0.0039412	0.0116447
>generic|frv2_109970|p.sativum_wa1_contig16621_6	frv2_109970;frv2_109968;Q9LXM8	p.sativum_wa1_contig16621_6 PREDICTED: 60S acidic ribosomal protein P2-4-like n=1 Tax=Cicer arietinum RepID=UPI00032A71E1 (UniRef100_UPI00032A71E1 icov:42% qcovs:84.06% e-val:1e-30)	not assigned.unknown	3	0.590757	0.0646253	0.0540197	4.62871	0.294176	0.27021	0.735339	0.123422	0.157397	1.01362	0.00602137	0.0163978	0.478311	0.00280797	0.10054	0.209527	0.178049	0.593758	0.672214	0.761645	0.643607	2.59058	0.0312613	0.033147
>generic|carvalho36659|PsCam052261_1_AA	Q00747	PsCam052261_1_AA Protein LE25 OS=Solanum lycopersicum GN=LE25 PE=2 SV=1 (sp	not assigned.unknown	3	1.14787	0.805444	0.289535	1.96885	0.728227	0.354355	63.1008	0.494048	0.292915	0.958353	0.286812	0.153446	0.441404	0.0133284	0.197828	0.333124	0.373901	0.593758	1.72135	0.492478	0.567228	125.013	0.0274022	0.0310534	X
>generic|frv2_50474|franssen_31140_6	frv2_50474;frv2_113962;Q6DBP4	franssen_31140_6 Notum-like protein n=1 Tax=Medicago truncatula RepID=UPI00023680D8 (UniRef100_UPI00023680D8 icov:99% qcovs:93.36% e-val:0)	cell wall.pectin*esterases.acetyl esterase	4	1.14776	0.0413675	0.0409368	0.114931	0.000837472	0.0127487	1.21968	0.0012511	0.00853735	0.761821	0.00988243	0.0212704	1.25125	0.188805	0.442581	0.710382	0.375817	0.593758	0.741108	0.877368	0.682485	0.811379	0.0296971	0.0319237
>generic|frv2_129622|p.sativum_wa1_contig31643_5	frv2_129622	p.sativum_wa1_contig31643_5 Late embryogenesis abundant D-like protein n=1 Tax=Medicago truncatula RepID=A0A072VPF7_MEDTR (UniRef100_A0A072VPF7 icov:98% qcovs:87.72% e-val:7e-137)	development.late embryogenesis abundant	4	0.719875	0.00128452	0.00820945	0.0201269	0.000157149	0.00414655	0.6818	2.02855e-05	0.000876693	0.859158	0.599501	0.259008	0.823135	0.138369	0.426098	0.011325	0.215492	0.593758	0.736047	0.351022	0.560593	1.02278	0.000268592	0.00250618	X
>generic|carvalho17808|PsCam023391_1_AA	P20075;frv2_118084	PsCam023391_1_AA Embryonic protein DC-8 OS=Daucus carota PE=3 SV=1 (sp	development.late embryogenesis abundant	4	0.76014	8.13574e-05	0.00207985	0.0307804	0.00400181	0.025141	0.571739	5.7266e-09	2.22741e-06	1.06082	0.328344	0.169848	0.92829	0.293925	0.496739	0.0121373	0.245097	0.593758	1.17813	0.43489	0.560593	1.8012	2.21862e-05	0.000612191
>generic|carvalho17830|PsCam023421_1_AA	P09444	PsCam023421_1_AA Late embryogenesis abundant protein D-34 OS=Gossypium hirsutum PE=4 SV=1 (sp	development.late embryogenesis abundant	4	0.734585	0.325207	0.153409	0.0110799	0.00416062	0.0257303	3.75091	0.0144839	0.0410301	0.818943	0.682185	0.278437	0.80808	0.180305	0.442581	0.00424052	0.189081	0.593758	1.32551	0.0249329	0.271758	0.96275	0.000438441	0.00340918	X
>generic|frv2_124668|p.sativum_wa1_contig28546_5	frv2_124668	p.sativum_wa1_contig28546_5 Dehydrin 2 n=1 Tax=Pisum sativum RepID=O04117_PEA (UniRef100_O04117 icov:98% qcovs:98.82% e-val:8e-169)	development.late embryogenesis abundant	4	0.496717	0.00248856	0.0101789	0.0276199	0.00187805	0.0166001	0.809425	3.14145e-07	6.10948e-05	0.922786	0.0278209	0.0375739	0.971377	0.829884	0.665712	0.0170436	0.303914	0.593758	0.953974	0.436071	0.560593	1.07968	0.00129486	0.00656637	X
>generic|frv2_125937|p.sativum_wa1_contig29360_6	frv2_125937	p.sativum_wa1_contig29360_6 Dehydrin-1 n=1 Tax=Macrotyloma uniflorum RepID=M4Q8Z7_9FABA (UniRef100_M4Q8Z7 icov:90% qcovs:71.73% e-val:5e-62)	development.late embryogenesis abundant	4	0.783171	0.0446689	0.0430917	0.0300225	8.03164e-08	3.17886e-05	0.598311	9.74203e-07	0.000126308	0.776178	0.219875	0.126579	0.847062	0.445368	0.554755	0.0333322	0.213015	0.593758	0.77792	0.834497	0.672402	0.487608	0.0069174	0.0158199	X
>generic|carvalho17775|PsCam023347_1_AA	P13940	PsCam023347_1_AA Late embryogenesis abundant protein D-29 OS=Gossypium hirsutum PE=3 SV=1 (sp	development.late embryogenesis abundant	4	0.77222	0.0232773	0.02963	0.137359	0.0276975	0.0758765	1.93227	3.21968e-05	0.000934533	1.64692	0.23925	0.134689	0.887681	0.177632	0.442581	0.168751	0.332465	0.593758	2.14222	0.324225	0.560593	3.43669	0.000635327	0.00414942	X
>generic|carvalho31031|PsCam044579_1_AA	P28641	PsCam044579_1_AA Dehydrin DHN3 OS=Pisum sativum GN=DHN3 PE=2 SV=1 (sp	development.late embryogenesis abundant	4	0.853257	0.242155	0.120579	0.0692613	0.00954972	0.04211	2.2748	8.07989e-05	0.00164227	1.11925	0.179764	0.111634	0.605099	0.0999459	0.379488	0.0578341	0.326562	0.593758	2.94894	0.203062	0.523091	2.37078	0.0215025	0.0278661	X
>generic|frv2_74601|Pisum_sativum_v2_Contig482_5	frv2_74601	Pisum_sativum_v2_Contig482_5 Vicilin n=1 Tax=Pisum sativum RepID=VCLC_PEA (UniRef100_P13918 icov:94% qcovs:91.58% e-val:5e-119)	development.storage proteins	4	0.0224772	0.00406621	0.01155	0.033956	0.122417	0.18076	0.410557	0.493403	0.292915	0.892903	0.572658	0.251999	1.32166	0.347708	0.515593	0.0108554	0.373901	0.593758	0.246318	0.592152	0.59255	0.324212	0.000207783	0.00230808	X
>generic|frv2_116323|p.sativum_wa1_contig22568_3	frv2_116323	p.sativum_wa1_contig22568_3 Alcohol dehydrogenase 1 n=1 Tax=Pisum sativum RepID=ADH1_PEA (UniRef100_P12886 icov:98% qcovs:93.93% e-val:0)	fermentation.ADH	4	0.716355	0.0208347	0.0279106	0.258093	0.0139524	0.0534794	0.93915	0.0011449	0.00795216	0.820009	0.355918	0.18081	0.733869	0.0200201	0.23317	2.39231	0.0738108	0.593758	1.10055	0.0124	0.189371	1.00933	0.633134	0.180332	X
>generic|frv2_118615|p.sativum_wa1_contig24344_4	frv2_118615;frv2_45178;P24095	p.sativum_wa1_contig24344_4 Lipoxygenase n=1 Tax=Pisum sativum RepID=O24295_PEA (UniRef100_O24295 icov:99% qcovs:98.73% e-val:0)	hormone metabolism.jasmonate.synthesis-degradation.lipoxygenase	4	1.36812	0.395718	0.17568	0.334164	0.00996049	0.0423902	0.153614	0.00211822	0.0119406	1.04248	0.168546	0.108522	2.94147	0.102889	0.384488	1	nan	nan	1.30789	0	0	0.647988	0.102889	0.0585373
>generic|frv2_123019|p.sativum_wa1_contig27473_5	frv2_123019	p.sativum_wa1_contig27473_5 PREDICTED: P24 oleosin isoform A-like n=1 Tax=Cicer arietinum RepID=UPI00032A538E (UniRef100_UPI00032A538E icov:88% qcovs:78.79% e-val:5e-99)	lipid metabolism.TAG synthesis	4	0.869918	0.389844	0.17408	0.0745625	0.0151028	0.0555532	1.23536	6.72774e-06	0.000436136	0.962148	0.787851	0.307223	0.716549	0.137599	0.425888	0.309153	0.407735	0.597213	0.691711	0.343928	0.560593	0.888927	0.0191038	0.0266848	X
>generic|frv2_123532|p.sativum_wa1_contig27828_4	frv2_123532	p.sativum_wa1_contig27828_4 Uncharacterized protein n=1 Tax=Medicago truncatula RepID=I3TAJ1_MEDTR (UniRef100_I3TAJ1 icov:94% qcovs:85.39% e-val:1e-140)	misc.glutathione S transferases	4	1.60065	0.0010715	0.00796634	0.065292	0.00125527	0.0146722	0.986809	0.000332642	0.00404326	0.74322	0.0260982	0.0359785	0.835741	0.300117	0.497458	1.20234	0.688425	0.633374	0.99559	0.47443	0.564505	1.36734	0.756701	0.206452	X
>generic|carvalho27654|PsCam038912_1_AA	Q5KTS5	PsCam038912_1_AA Glucose and ribitol dehydrogenase OS=Daucus carota GN=CAISE5 PE=2 SV=1 (sp	misc.short chain dehydrogenase/reductase (SDR)	4	1.61771	8.92328e-05	0.0021057	0.335983	0.0306751	0.0776035	1.74803	2.47245e-05	0.000888424	0.765045	0.194977	0.117566	0.621068	0.0933307	0.376245	0.920674	0.893663	0.710397	0.846155	0.369804	0.560593	1.29697	0.576268	0.168799	X
>generic|carvalho26825|PsCam037823_1_AA	Q9XI37;frv2_88420	PsCam037823_1_AA SNF1-related protein kinase regulatory subunit gamma-like PV42a OS=Arabidopsis thaliana GN=PV42A PE=2 SV=1 (sp	not assigned.no ontology	4	0.843601	0.0928995	0.0675331	0.191057	0.000429747	0.00809956	1.40738	0.00012113	0.00188458	1.16852	0.00956146	0.0210128	0.911011	0.268896	0.490887	0.775174	0.712846	0.650407	2.09237	0.715887	0.631282	3.25702	0.0519648	0.0427162
>generic|frv2_112093|p.sativum_wa1_contig18999_5	frv2_112093	p.sativum_wa1_contig18999_5 Seed biotin-containing protein SBP65 n=1 Tax=Pisum sativum RepID=SBP65_PEA (UniRef100_Q41060 icov:94% qcovs:43.06% e-val:3e-108)	not assigned.unknown	4	0.868067	0.0108411	0.0179771	0.0152122	9.5414e-07	0.000188821	0.90552	6.37018e-06	0.000436136	1.43861	0.131898	0.0963109	0.859964	0.243129	0.482083	0.0265583	0.227733	0.593758	0.839889	0.384888	0.560593	0.815392	0.000218116	0.00231273	X
>generic|frv2_42493|franssen_25990_6	frv2_42493	franssen_25990_6 ABA-responsive protein ABR18 n=1 Tax=Pisum sativum RepID=ABR18_PEA (UniRef100_Q06930 icov:85% qcovs:100% e-val:3e-106)	not assigned.unknown	4	1.21245	0.0834963	0.0634018	0.428378	0.00441494	0.0259626	1.16419	0.020072	0.0494365	0.818549	0.00291566	0.0113964	0.990889	0.964191	0.694655	0.461367	0.486623	0.606728	1.02257	0.43781	0.560593	0.974826	0.0276576	0.0310534	X
>generic|frv2_76029|Pisum_sativum_v2_Contig1573_2	frv2_76029;frv2_49064;frv2_5840	Pisum_sativum_v2_Contig1573_2 Kunitz type trypsin inhibitor n=1 Tax=Medicago truncatula RepID=A0A072VCP7_MEDTR (UniRef100_A0A072VCP7 icov:92% qcovs:82.08% e-val:5e-120)	not assigned.unknown	4	1.12104	0.0861548	0.0641618	0.235829	4.60521e-05	0.00260387	0.444553	0.000963162	0.00703186	0.851666	0.000680426	0.00677551	0.69329	0.014156	0.198137	0.956551	0.908818	0.714859	0.472017	0.536553	0.580284	0.339383	0.15884	0.0719468
>generic|frv2_83788|Pisum_sativum_v2_Contig5865_5	frv2_83788;frv2_25771	Pisum_sativum_v2_Contig5865_5 PREDICTED: gamma-glutamyl hydrolase-like n=1 Tax=Cicer arietinum RepID=UPI00032A87AC (UniRef100_UPI00032A87AC icov:97% qcovs:79.3% e-val:0)	protein.degradation	4	0.966863	0.509696	0.210292	0.460768	0.00206597	0.0166001	1.00639	0.000357324	0.00408778	0.726526	0.0485551	0.0541338	1.19827	0.0862675	0.369659	0.823048	0.348133	0.593758	0.711019	0.536515	0.580284	0.46424	0.0497514	0.0425111
>generic|mut07|p.sativum_wa1_contig02961_m	mut07;frv2_95869;frv2_95871;frv2_69121;frv2_78294;frv2_102986;O24534	p.sativum_wa1_contig02961_m no BLAST information available	protein.synthesis.elongation	4	1.12641	0.0799028	0.0622159	0.123932	4.11347e-05	0.00260387	2.48356	2.51252e-05	0.000888424	0.864947	0.882271	0.329408	1.0609	0.622697	0.611529	0.833149	0.720336	0.654038	1.87616	0.63468	0.606723	2.52865	0.00120855	0.00626486
>generic|carvalho6215|PsCam000846_1_AA	Q06652;frv2_49842;frv2_49471;O48646	PsCam000846_1_AA Probable phospholipid hydroperoxide glutathione peroxidase OS=Citrus sinensis GN=CSA PE=1 SV=1 (sp	redox.ascorbate and glutathione.glutathione	4	1.09136	0.500949	0.208234	0.0746121	2.5873e-05	0.00204807	0.481784	0.000997502	0.00705433	0.832471	0.0206695	0.0322404	0.918921	0.612337	0.610148	0.520462	0.520163	0.608161	0.795698	0.389664	0.560593	2.06127	0.0278224	0.0310534
>generic|frv2_75478|Pisum_sativum_v2_Contig1149_5	frv2_75478;P38548	Pisum_sativum_v2_Contig1149_5 Ran1 n=1 Tax=Pisum sativum RepID=A2ICP9_PEA (UniRef100_A2ICP9 icov:91% qcovs:98.64% e-val:2e-163)	signalling.G-proteins	4	0.990463	0.896878	0.310889	0.171341	0.000423653	0.00809956	16.0088	0.000756171	0.00653599	1.00854	0.253346	0.139819	1.15537	0.346673	0.515593	0.763863	0.123723	0.593758	1.31758	0.446778	0.560593	1.56944	0.00404675	0.0116447
>generic|frv2_96466|p.sativum_wa1_contig04084_1	frv2_96466	p.sativum_wa1_contig04084_1 Temperature-induced lipocalin n=2 Tax=Populus RepID=B6V700_POPCN (UniRef100_B6V700 icov:92% qcovs:86.19% e-val:8e-113)	transport.misc	4	1.01023	0.845523	0.298828	0.372946	0.0358423	0.0854586	0.503312	0.0564017	0.0983766	0.712343	0.0731505	0.0684602	0.994507	0.872152	0.674918	1.08233	0.833761	0.685036	1.12262	0.444242	0.560593	1.16642	0.259816	0.0965087	X
>generic|frv2_113296|p.sativum_wa1_contig20102_6	frv2_113296;frv2_49892	p.sativum_wa1_contig20102_6 Transaldolase family protein n=1 Tax=Medicago truncatula RepID=G7KXR2_MEDTR (UniRef100_G7KXR2 icov:98% qcovs:91.67% e-val:0)	OPP.non-reductive PP.transaldolase		0.688574	0.00567551	0.0130909	0.418206	0.0589372	0.117221	1.48319	0.0497971	0.0888488	0.914956	0.00180967	0.0107365	1.07611	0.0269783	0.25256	0.993691	0.967671	0.720682	1.04734	0.326277	0.560593	0.711105	0.443627	0.139468
>generic|frv2_74188|Pisum_sativum_v2_Contig251_6	frv2_74188;frv2_98253;frv2_47120;P34091	Pisum_sativum_v2_Contig251_6 Putative uncharacterized protein n=1 Tax=Medicago truncatula RepID=B7FH81_MEDTR (UniRef100_B7FH81 icov:97% qcovs:93.59% e-val:3e-151)	protein.synthesis.ribosomal protein.eukaryotic.60S subunit.L6		1.40924	0.0634896	0.0534813	0.215506	0.0617078	0.119723	2.15191	0.631076	0.322818	1.40715	0.678353	0.27773	1.13386	0.0397292	0.301699	2.00466	0.416608	0.599086	1.0761	0.437663	0.560593	1.18371	0.0969205	0.0574017
>generic|frv2_75359|Pisum_sativum_v2_Contig1046_3	frv2_75359	Pisum_sativum_v2_Contig1046_3 Legumin (Minor small) n=1 Tax=Pisum sativum RepID=O24294_PEA (UniRef100_O24294 icov:98% qcovs:98.94% e-val:0)	development.storage proteins		1.25409	0.00166449	0.00895714	2.37693	0.735135	0.355263	0.665149	0.521109	0.297636	0.740598	0.00215432	0.0111345	0.719214	0.00747388	0.162328	1.00737	0.953587	0.720682	0.876448	0.0981631	0.422559	0.932273	0.210297	0.0840262	X
>generic|frv2_1391|franssen_828_1	frv2_1391;frv2_76886;frv2_99206	franssen_828_1 40S ribosomal protein S6 n=1 Tax=Medicago truncatula RepID=Q2HTS1_MEDTR (UniRef100_Q2HTS1 icov:90% qcovs:97.19% e-val:6e-171)	protein.synthesis.ribosomal protein.eukaryotic.40S subunit.S6		0.710516	0.0200737	0.027128	0.689256	0.0278092	0.0758765	0.659791	0.0123383	0.0373429	1.00814	0.0888424	0.0756842	1.24193	0.226485	0.474074	0.36818	0.155661	0.593758	1.95322	0.0765934	0.395802	1.38964	0.0018658	0.00768545
>generic|carvalho24083|PsCam034398_1_AA	Q67YU0	PsCam034398_1_AA Cytokinin dehydrogenase 5 OS=Arabidopsis thaliana GN=CKX5 PE=2 SV=1 (sp	hormone metabolism.cytokinin.synthesis-degradation		0.690833	0.0149348	0.0218171	1.56526	0.499321	0.306875	0.93602	0.323413	0.255224	0.962078	0.00944503	0.0210128	0.506059	0.0403183	0.302653	0.390102	0.211842	0.593758	1.12104	0.262955	0.560593	1.12224	0.155074	0.0714907	X
>generic|frv2_79740|Pisum_sativum_v2_Contig3821_5	frv2_79740;frv2_59518	Pisum_sativum_v2_Contig3821_5 Ricin-type beta-trefoil lectin domain protein n=1 Tax=Medicago truncatula RepID=G7KZD5_MEDTR (UniRef100_G7KZD5 icov:91% qcovs:70.26% e-val:2e-140)	not assigned.no ontology.hydroxyproline rich proteins		0.540031	0.00139921	0.00831458	1.53953	0.299114	0.270908	1.64583	0.00352482	0.0169261	0.886441	0.966652	0.348707	1.23958	0.0467956	0.3073	0.426249	0.215368	0.593758	1.46471	0.686628	0.617974	1.28621	0.00936969	0.0190508
>generic|frv2_77640|Pisum_sativum_v2_Contig2600_6	frv2_77640	Pisum_sativum_v2_Contig2600_6 Secreted protein n=1 Tax=Medicago truncatula RepID=G7ILJ6_MEDTR (UniRef100_G7ILJ6 icov:93% qcovs:91.46% e-val:1e-169)	not assigned.unknown		0.566784	0.000422307	0.00616914	0.688474	0.0154383	0.0555532	1.71058	0.0312232	0.0654966	1.07922	0.000146873	0.00348548	0.855471	0.270335	0.490887	0.289666	0.353379	0.593758	1.80673	0.219702	0.543696	1.0571	0.00104099	0.00578174	X
>generic|frv2_74110|Pisum_sativum_v2_Contig208_6	frv2_74110;P93732	Pisum_sativum_v2_Contig208_6 PREDICTED: proline iminopeptidase-like n=1 Tax=Cicer arietinum RepID=UPI00032AA6A8 (UniRef100_UPI00032AA6A8 icov:99% qcovs:84.83% e-val:0)	protein.degradation		0.690388	0.000580156	0.0071567	0.512938	0.00530035	0.029547	0.926382	0.00605399	0.0239062	1.0568	0.0112925	0.0228768	0.736103	0.00707653	0.162328	0.517827	0.304359	0.593758	0.582703	0.0120836	0.189371	0.860225	0.14215	0.0690919
>generic|frv2_80293|Pisum_sativum_v2_Contig4113_4	frv2_80293	Pisum_sativum_v2_Contig4113_4 Monodehydroascorbate reductase n=1 Tax=Pisum sativum RepID=MDAR_PEA (UniRef100_Q40977 icov:99% qcovs:99.77% e-val:0)	redox.ascorbate and glutathione		0.76966	0.0261727	0.0306482	1.1461	0.00633556	0.0326772	1.72699	0.00746506	0.0268852	0.997411	0.00289533	0.0113964	1.32521	0.0456095	0.3073	0.787521	0.485791	0.606728	1.13596	0.284448	0.560593	1.04544	0.313877	0.10954	X
>generic|frv2_78078|Pisum_sativum_v2_Contig2853_5	frv2_78078;frv2_52723	Pisum_sativum_v2_Contig2853_5 PREDICTED: annexin D5-like n=1 Tax=Cicer arietinum RepID=UPI00032ACA03 (UniRef100_UPI00032ACA03 icov:92% qcovs:86.98% e-val:0)	cell.organisation		0.500785	0.00674173	0.0141549	4.08298	0.304911	0.272049	0.0471551	0.250572	0.234285	0.842674	0.575528	0.252915	1.32904	0.141682	0.42723	0.643055	0.444312	0.602515	0.24944	0.76835	0.645111	1.19242	0.113948	0.0613875
>generic|frv2_96980|p.sativum_wa1_contig04807_6	frv2_96980;frv2_46407;Q9C514;frv2_76012	p.sativum_wa1_contig04807_6 40S ribosomal S7-like protein n=1 Tax=Medicago truncatula RepID=G7KN51_MEDTR (UniRef100_G7KN51 icov:88% qcovs:98.43% e-val:9e-132)	protein.synthesis.ribosomal protein.eukaryotic.40S subunit.S7		0.637128	0.0136144	0.020505	2.02961	0.171523	0.217588	0.669292	0.0257519	0.0581503	0.501568	0.226827	0.129709	1.07007	0.586815	0.599739	1.39959	0.0680117	0.593758	1.3309	0.332362	0.560593	1.42085	0.375166	0.123347
>generic|carvalho8572|PsCam004692_1_AA	P34422;frv2_48043	PsCam004692_1_AA Dipeptidyl peptidase family member 6 OS=Caenorhabditis elegans GN=dpf-6 PE=3 SV=2 (sp	protein.degradation		0.772695	0.0270941	0.0312222	2.01172	0.176285	0.220351	0.836303	0.145826	0.173989	1.37152	0.184467	0.113643	0.962637	0.673834	0.617429	1.21138	0.134839	0.593758	2.37668	0.501246	0.569392	3.07017	0.184158	0.0779647
>generic|frv2_52063|franssen_32237_6	frv2_52063;frv2_84696;Q8H107	franssen_32237_6 PREDICTED: dihydrolipoyllysine-residue succinyltransferase component of 2-oxoglutarate dehydrogenase complex 1, mitochondrial-like n=1 Tax=Cicer arietinum RepID=UPI00032A68C1 (UniRef100_UPI00032A68C1 icov:93% qcovs:87.3	TCA / org transformation.TCA.2-oxoglutarate dehydrogenase		1.45514	0.000653214	0.0071567	2.21875	0.255578	0.25351	1.2766	0.630111	0.322818	0.93552	0.99977	0.357163	1.20634	0.234122	0.479687	0.854146	0.734096	0.659356	1.21182	0.480168	0.566087	1.76117	0.834844	0.22105
>generic|frv2_51204|franssen_31653_1	frv2_51204;frv2_114281	franssen_31653_1 PREDICTED: dnaJ protein homolog isoform X2 n=1 Tax=Solanum tuberosum RepID=UPI0003D27B8E (UniRef100_UPI0003D27B8E icov:99% qcovs:85.37% e-val:0)	stress.abiotic.heat		0.848817	0.0294804	0.032649	2.4773	0.471896	0.302738	0.522553	0.511913	0.29638	0.838648	0.0071811	0.0183461	1.35742	0.386118	0.529754	0.820959	0.720787	0.654038	1.14945	0.374063	0.560593	0.842119	0.139122	0.0689967
>generic|frv2_80818|Pisum_sativum_v2_Contig4388_2	frv2_80818;O81983	Pisum_sativum_v2_Contig4388_2 PREDICTED: serine--tRNA ligase-like n=1 Tax=Cicer arietinum RepID=UPI00032AC2D1 (UniRef100_UPI00032AC2D1 icov:97% qcovs:89.49% e-val:0)	protein.aa activation.serine-tRNA ligase		1.2436	0.0271743	0.0312222	2.43472	0.0920295	0.151655	32.9557	0.549199	0.304731	1.39799	0.0744685	0.0685354	1.08085	0.566089	0.587484	0.779471	0.463552	0.602515	2.13223	0.886311	0.685037	24.3425	0.327279	0.112603
>generic|carvalho8728|PsCam004886_1_AA	C0HJB3;frv2_52374	PsCam004886_1_AA Alpha-mannosidase OS=Canavalia ensiformis PE=1 SV=1 (sp	misc.gluco-, galacto- and mannosidases.alpha-mannosidase		0.836651	0.0044648	0.0121952	2.35122	0.10915	0.168096	0.554552	0.0331829	0.0682899	0.739754	0.448289	0.211324	0.955541	0.726642	0.631891	0.711667	0.471553	0.602515	1.21965	0.254958	0.560593	2.10062	0.0644849	0.0668854
>generic|frv2_109914|p.sativum_wa1_contig16581_4	frv2_109914	p.sativum_wa1_contig16581_4 Glutathione S-transferase, amino-terminal domain protein n=1 Tax=Medicago truncatula RepID=B7FN12_MEDTR (UniRef100_B7FN12 icov:98% qcovs:74.89% e-val:1e-119)	misc.glutathione S transferases		1.47748	0.0116547	0.0189227	2.05255	0.616205	0.33776	0.295085	0.726484	0.348855	1.29964	0.0493778	0.054684	1.0674	0.64991	0.613885	0.71089	0.600641	0.621285	1.49511	0.302766	0.560593	3.34657	0.0594087	0.0578308	X
>generic|frv2_83016|Pisum_sativum_v2_Contig5480_4	frv2_83016;frv2_25322	Pisum_sativum_v2_Contig5480_4 Flavonoid glucosyltransferase n=1 Tax=Medicago truncatula RepID=A0A072UML8_MEDTR (UniRef100_A0A072UML8 icov:97% qcovs:93.33% e-val:0)	secondary metabolism.flavonoids.flavonols.flavonol 3-O-glycosyltransferase		1.45674	0.0136356	0.020505	2.89344	0.534947	0.316958	0.374013	0.591172	0.312846	1.70538	0.211782	0.124333	0.75904	0.319881	0.50134	0.707588	0.631906	0.627871	1.9728	0.333289	0.560593	1.5932	0.121126	0.0630694
>generic|frv2_111189|p.sativum_wa1_contig18126_5	frv2_111189;frv2_57597;Q3LRV4	p.sativum_wa1_contig18126_5 Nitrilase/nitrile hydratase NIT4A-like protein n=1 Tax=Medicago truncatula RepID=A0A072UKA3_MEDTR (UniRef100_A0A072UKA3 icov:98% qcovs:92.57% e-val:0)	secondary metabolism.sulfur-containing.glucosinolates.degradation.nitrilase		1.64413	0.0358681	0.0371734	5.8869	0.25454	0.253129	0.507701	0.268446	0.238611	0.0499352	0.120108	0.0916963	0.828308	0.71748	0.628803	0.672666	0.576718	0.62084	0.543624	0.343635	0.560593	1.91611	0.557273	0.165595
>generic|carvalho29956|PsCam042619_1_AA	Q43848;frv2_111145;frv2_64237	PsCam042619_1_AA Transketolase, chloroplastic OS=Solanum tuberosum PE=2 SV=1 (sp	PS.calvin cycle.transketolase		1.95407	0.0221757	0.0290722	2.80382	0.140336	0.194002	0.552214	0.453919	0.281549	0.816965	0.530867	0.237062	0.846699	0.251815	0.484464	0.574621	0.366049	0.593758	1.3652	0.158791	0.48784	2.31205	0.506443	0.154429
>generic|frv2_101333|p.sativum_wa1_contig09501_6	frv2_101333;frv2_51951	p.sativum_wa1_contig09501_6 PREDICTED: translocon-associated protein subunit alpha-like n=1 Tax=Cicer arietinum RepID=UPI00032A6B5E (UniRef100_UPI00032A6B5E icov:91% qcovs:83.06% e-val:3e-146)	not assigned.no ontology		0.583302	0.0230037	0.0295129	5.98006	0.0502898	0.108176	0.272829	0.0543035	0.0697808	1.13974	0.800901	0.309758	1.40379	0.156828	0.436039	0.173935	0.361338	0.593758	3.18554	0.399432	0.560593	2.9987	0.227713	0.0885313
>generic|frv2_27909|franssen_16426_2	frv2_27909;Q9ZPI1;frv2_78036;frv2_102342	franssen_16426_2 Lysine--tRNA ligase n=1 Tax=Glycine max RepID=I1LZI3_SOYBN (UniRef100_I1LZI3 icov:99% qcovs:91.52% e-val:0)	protein.aa activation.lysine-tRNA ligase		1.65567	0.0240146	0.0299472	2.39451	0.37531	0.287321	0.396362	0.420779	0.276463	0.157181	0.0755726	0.0687774	0.924543	0.63814	0.613214	0.480063	0.0991154	0.593758	0.193632	0.4126	0.560593	0.219125	0.2089	0.083873
>generic|frv2_111520|p.sativum_wa1_contig18451_1	frv2_111520	p.sativum_wa1_contig18451_1 PREDICTED: vacuolar protein sorting-associated protein 27-like n=1 Tax=Cicer arietinum RepID=UPI00032AA3AD (UniRef100_UPI00032AA3AD icov:90% qcovs:79.51% e-val:0)	RNA.regulation of transcription.Trihelix, Triple-Helix transcription factor family		0.800196	0.028407	0.0322758	2.30291	0.486329	0.304627	0.282649	0.515946	0.296638	0.720195	0.31978	0.166713	0.754953	0.379553	0.527761	0.437598	0.373901	0.593758	0.724788	0.250418	0.558227	1.18937	0.0174077	0.0259051	X
>generic|frv2_98818|p.sativum_wa1_contig07012_6	frv2_98818;frv2_48171	p.sativum_wa1_contig07012_6 Uncharacterized protein n=2 Tax=Soja RepID=I1K670_SOYBN (UniRef100_I1K670 icov:95% qcovs:94.74% e-val:0)	stress.abiotic.heat		0.808972	0.0367519	0.0377644	2.35301	0.624111	0.338541	1.13261	0.375262	0.262587	1.21459	0.0145658	0.0258786	1.06002	0.2238	0.474074	0.433865	0.312799	0.593758	0.601233	0.646951	0.607326	0.654273	0.117986	0.0622684
>generic|frv2_76283|Pisum_sativum_v2_Contig1745_5	frv2_76283;frv2_76285;Q39817;frv2_53436	Pisum_sativum_v2_Contig1745_5 Calnexin 2 n=1 Tax=Medicago truncatula RepID=G7LGJ8_MEDTR (UniRef100_G7LGJ8 icov:98% qcovs:90.87% e-val:0)	signalling.calcium		0.731409	0.0353408	0.0367764	2.26772	0.309498	0.272853	1.06049	0.088482	0.128898	0.878767	0.0973276	0.0803179	1.03881	0.691474	0.6185	0.424949	0.152381	0.593758	0.814425	0.431266	0.560593	0.731306	0.0542392	0.0437799
>generic|carvalho21033|PsCam028081_1_AA	Q41649;frv2_51935;frv2_102157	PsCam028081_1_AA FK506-binding protein 2 OS=Vicia faba GN=FKBP15 PE=1 SV=1 (sp	cell.cycle.peptidylprolyl isomerase		0.665995	0.02919	0.0324445	2.10641	0.459945	0.302738	1.36153	0.223455	0.219483	0.771677	0.106969	0.0856367	1.01893	0.864054	0.674182	0.356617	0.304137	0.593758	1.24154	0.672207	0.615149	2.72016	0.106246	0.0595901
>generic|frv2_52498|franssen_32529_1	frv2_52498;frv2_78762	franssen_32529_1 Annexin n=1 Tax=Medicago truncatula RepID=B7FJY0_MEDTR (UniRef100_B7FJY0 icov:96% qcovs:90.48% e-val:0)	cell.organisation		0.704621	0.00121971	0.00796634	2.77568	0.464265	0.302738	0.399283	0.285444	0.245887	0.678087	0.467368	0.218393	1.10776	0.412329	0.544356	0.334808	0.347532	0.593758	0.36847	0.505587	0.569931	0.594478	0.248802	0.0942178
>generic|frv2_121399|p.sativum_wa1_contig26366_5	frv2_121399;Q9VK68	p.sativum_wa1_contig26366_5 Thioredoxin family Trp26 protein n=2 Tax=Medicago truncatula RepID=G7ILW3_MEDTR (UniRef100_G7ILW3 icov:99% qcovs:96.55% e-val:1e-145)	not assigned.unknown		0.564415	0.04929	0.0461497	2.5638	0.146221	0.195896	0.353712	0.086315	0.127171	0.914294	0.432488	0.206153	1.18484	0.265979	0.490688	0.326178	0.182701	0.593758	1.42002	0.322382	0.560593	1.86798	0.0765823	0.0510411
>generic|frv2_49464|franssen_30432_1	frv2_49464;frv2_116283;Q9ES53	franssen_30432_1 Ubiquitin fusion degradation 1 protein n=1 Tax=Medicago truncatula RepID=G7LAK8_MEDTR (UniRef100_G7LAK8 icov:93% qcovs:92.83% e-val:0)	protein.degradation.ubiquitin		1.34216	0.00551525	0.0129432	2.042	0.673354	0.34309	0.626599	0.958896	0.405404	0.619275	0.143847	0.0999822	0.947851	0.676988	0.617429	0.166388	0.171006	0.593758	1.17657	0.565635	0.589252	1.78553	1.18143e-06	5.51186e-05
>generic|frv2_81021|Pisum_sativum_v2_Contig4488_6	frv2_81021;P28723;frv2_48710	Pisum_sativum_v2_Contig4488_6 PREDICTED: formate--tetrahydrofolate ligase-like n=1 Tax=Cicer arietinum RepID=UPI00032AC239 (UniRef100_UPI00032AC239 icov:99% qcovs:88.11% e-val:0)	C1-metabolism.formate-tetrahydrofolate ligase		1.22249	0.00366788	0.0113657	0.865171	0.00107947	0.0137821	0.753181	0.000118474	0.00188458	0.82218	0.00308185	0.011769	0.975001	0.752489	0.638239	1.71369	0.0550446	0.593758	1.48607	0.135815	0.48015	1.05219	0.118481	0.0623885
>generic|frv2_117558|p.sativum_wa1_contig23529_4	frv2_117558;Q9SAH9	p.sativum_wa1_contig23529_4 PREDICTED: cinnamoyl-CoA reductase 2-like isoform X1 n=1 Tax=Cicer arietinum RepID=UPI00032A54F6 (UniRef100_UPI00032A54F6 icov:96% qcovs:83.02% e-val:0)	secondary metabolism.phenylpropanoids		0.556444	0.00438885	0.0121295	0.952519	0.0019672	0.0166001	0.364091	0.175183	0.190865	1.96771	0.00526749	0.0147795	1.15291	0.2782	0.494969	0.757435	0.656281	0.627901	0.603613	0.0245914	0.271758	1.67444	0.0152797	0.024413
>generic|carvalho33977|PsCam048884_1_AA	Q863B3	PsCam048884_1_AA Staphylococcal nuclease domain-containing protein 1 OS=Bos taurus GN=SND1 PE=1 SV=1 (sp	RNA.regulation of transcription.Zn-finger(CCHC)		0.824571	0.00199816	0.00933228	0.735531	0.00213209	0.0166001	1.87177	0.00582414	0.0233542	0.933641	0.031066	0.0390958	1.02506	0.805066	0.654754	1.45013	0.311839	0.593758	1.30471	0.00634038	0.143846	3.24348	0.380668	0.124717	X
>generic|frv2_79620|Pisum_sativum_v2_Contig3756_2	frv2_79620;frv2_47177	Pisum_sativum_v2_Contig3756_2 Cinnamyl-alcohol dehydrogenase-like protein n=2 Tax=Medicago truncatula RepID=G7IYC1_MEDTR (UniRef100_G7IYC1 icov:96% qcovs:87.65% e-val:0)	misc.alcohol dehydrogenases.cinnamyl alcohol dehydrogenase		0.835927	0.00114334	0.00796634	0.653197	0.00218095	0.0166001	0.692116	0.00172745	0.0101804	1.45194	0.0903823	0.0766463	0.950989	0.539673	0.578654	0.835706	0.681768	0.632535	0.807457	0.0467297	0.335707	1.09621	0.0298371	0.0319272
>generic|frv2_59932|franssen_37226_1	frv2_59932;A1L2I9;frv2_77617	franssen_37226_1 PREDICTED: uncharacterized protein LOC101509424 n=1 Tax=Cicer arietinum RepID=UPI00032A54DC (UniRef100_UPI00032A54DC icov:91% qcovs:85.5% e-val:0)	not assigned.unknown		1.35936	0.00715191	0.0141549	1.99361	0.0027073	0.019791	0.92295	0.0018571	0.0107811	0.862076	0.491307	0.22498	1.17232	0.128774	0.41225	1.82169	0.276161	0.593758	0.735906	0.291078	0.560593	0.749481	0.0704342	0.0486978
>generic|carvalho6576|PsCam001423_1_AA	Q96520	PsCam001423_1_AA Peroxidase 12 OS=Arabidopsis thaliana GN=PER12 PE=1 SV=1 (sp	misc.peroxidases		1.49566	0.0297306	0.0328076	0.98461	0.00452136	0.0259626	0.72371	0.00359202	0.0170384	1.20989	0.167826	0.108479	0.693361	0.138972	0.426098	0.51878	0.318289	0.593758	0.713394	0.400596	0.560593	0.809774	0.0695622	0.0486132	X
>generic|carvalho28486|PsCam040182_1_AA	Q0WMZ5	PsCam040182_1_AA Outer envelope pore protein 16-2, chloroplastic OS=Arabidopsis thaliana GN=OEP162 PE=2 SV=1 (sp	protein.targeting.mitochondria		1.61401	4.46597e-05	0.00160368	0.846548	0.00690748	0.0346067	0.621941	0.00096623	0.00703186	1.24854	0.0213494	0.0329181	0.781932	0.479897	0.563493	0.576915	0.3328	0.593758	1.22012	0.394558	0.560593	6.68404	0.341133	0.115663	X
>generic|carvalho36600|PsCam052175_1_AA	Q9SQ57	PsCam052175_1_AA Peroxygenase OS=Sesamum indicum GN=SOP1 PE=1 SV=1 (sp	signalling.calcium		0.789916	0.0197986	0.0268745	0.530232	0.00705069	0.0348826	0.425229	0.00399274	0.0178507	0.937474	0.00352444	0.0127278	1.07727	0.446836	0.554755	0.89592	0.843918	0.690804	0.805176	0.187673	0.508929	1.12879	0.00198832	0.00768545	X
>generic|frv2_49395|franssen_30382_2	frv2_49395	franssen_30382_2 Nascent proteinassociated complex alpha chain n=1 Tax=Medicago truncatula RepID=G7L4T7_MEDTR (UniRef100_G7L4T7 icov:87% qcovs:92.57% e-val:2e-116)	protein.synthesis.elongation		0.768273	0.0327263	0.0352264	0.77148	0.00833853	0.0388274	0.997908	0.0972062	0.13799	0.760395	0.28987	0.154833	1.0106	0.867878	0.674918	1.54955	0.396874	0.594506	0.796427	0.780349	0.650433	0.967296	0.420095	0.133566	X
>generic|frv2_75734|Pisum_sativum_v2_Contig1363_5	frv2_75734;frv2_15713	Pisum_sativum_v2_Contig1363_5 Kunitz type trypsin inhibitor / miraculin n=1 Tax=Medicago truncatula RepID=G7KKP4_MEDTR (UniRef100_G7KKP4 icov:92% qcovs:86.83% e-val:4e-119)	stress.biotic.PR-proteins.proteinase inhibitors.trypsin inhibitor		1.78777	0.00693521	0.0141549	0.619916	0.008749	0.0398022	1.50608	0.00131846	0.00884188	1.49058	0.355775	0.18081	0.681011	0.125967	0.407256	0.986297	0.975117	0.720682	0.996857	0.235802	0.549017	1.68427	0.725718	0.200105
>generic|frv2_136643|p.sativum_wa1_contig35593_4	frv2_136643	p.sativum_wa1_contig35593_4 Heat shock protein hsp70 n=1 Tax=Pisum sativum RepID=Q40980_PEA (UniRef100_Q40980 icov:87% qcovs:99.31% e-val:2e-94)	stress.abiotic.heat		0.727723	0.00191772	0.00919221	0.71193	0.014929	0.0555532	1.58121	0.00943449	0.0319099	1.18174	0.0412938	0.0484784	0.914374	0.270409	0.490887	0.73732	0.59568	0.62084	0.505164	0.0664146	0.38153	0.694008	0.0151018	0.024413	X
>generic|carvalho7412|PsCam002883_1_AA	Q06930	PsCam002883_1_AA ABA-responsive protein ABR18 OS=Pisum sativum PE=2 SV=1 (sp	not assigned.unknown		1.47311	0.0118598	0.0190484	0.762015	0.0205697	0.0641049	1.07656	0.0283972	0.0624032	0.997162	0.00418436	0.0136295	0.898192	0.230146	0.478669	0.540781	0.464008	0.602515	0.993172	0.532209	0.577495	0.587121	0.015404	0.0244442	X
>generic|frv2_118282|p.sativum_wa1_contig24084_4	frv2_118282;P34913;frv2_8050	p.sativum_wa1_contig24084_4 Epoxide hydrolase n=2 Tax=Medicago truncatula RepID=A2Q324_MEDTR (UniRef100_A2Q324 icov:94% qcovs:92.48% e-val:0)	misc.misc2		0.746802	0.0227433	0.0293151	1.07683	0.0251853	0.0732351	0.458098	0.376378	0.262587	0.879126	0.29681	0.157779	0.668084	0.157281	0.436039	1	nan	nan	1.07134	0.157281	0.48784	1.82085	0	0
>generic|frv2_47021|franssen_28824_1	frv2_47021;frv2_111109;F4IW47	franssen_28824_1 Plastid transketolase n=1 Tax=Medicago truncatula RepID=G7IF28_MEDTR (UniRef100_G7IF28 icov:95% qcovs:94.98% e-val:0)	PS.calvin cycle.transketolase		1.18616	0.0453275	0.0433707	1.44509	0.0258424	0.0735844	0.728756	0.31148	0.251914	1.34918	0.236245	0.133948	0.756307	0.131242	0.416071	0.940356	0.832304	0.685036	0.756326	0.268227	0.560593	1.11627	0.071625	0.0491733
>generic|frv2_79617|Pisum_sativum_v2_Contig3754_5	frv2_79617;Q8W108	Pisum_sativum_v2_Contig3754_5 1,2-dihydroxy-3-keto-5-methylthiopentene dioxygenase n=1 Tax=Medicago truncatula RepID=A0A072VQU1_MEDTR (UniRef100_A0A072VQU1 icov:92% qcovs:90.5% e-val:7e-132)	metal handling.regulation		1.49191	0.0419608	0.0413903	1.2048	0.0263197	0.0739347	0.705864	0.0779802	0.120623	0.845942	0.626569	0.265509	1.11777	0.640021	0.613214	0.610425	0.00820373	0.541925	0.953599	0.00285845	0.103906	1.29257	0.0532086	0.0434095
>generic|frv2_57764|franssen_35862_4	frv2_57764;frv2_104019;frv2_104017	franssen_35862_4 Cinnamoyl-CoA reductase-like protein n=1 Tax=Medicago truncatula RepID=G7KEC3_MEDTR (UniRef100_G7KEC3 icov:94% qcovs:90.94% e-val:0)	secondary metabolism.phenylpropanoids.lignin biosynthesis.CCR1		0.735135	0.00301503	0.0107414	1.29266	0.0288143	0.0758765	0.807175	0.268696	0.238611	1.05629	0.0131592	0.024574	1.01179	0.906555	0.685356	0.857986	0.674419	0.631034	1.00099	0.00402609	0.119741	1.69651	0.0373605	0.036746
>generic|carvalho18675|PsCam024843_1_AA	Q6ZLK0;frv2_83060;frv2_50072	PsCam024843_1_AA Dolichyl-diphosphooligosaccharide--protein glycosyltransferase 48 kDa subunit OS=Oryza sativa subsp. japonica GN=OST48 PE=2 SV=1 (sp	protein.glycosylation		1.16894	0.0226603	0.0293151	1.60739	0.032263	0.0802833	0.878392	0.0233617	0.0547394	0.572134	0.0159946	0.0280345	1.06909	0.254072	0.485168	1.26322	0.646326	0.627871	0.914932	0.735556	0.637487	1.54766	0.0652675	0.0470734
>generic|frv2_103346|p.sativum_wa1_contig11514_4	frv2_103346;frv2_103348	p.sativum_wa1_contig11514_4 Flavonoid glucosyltransferase n=1 Tax=Medicago truncatula RepID=G7LH03_MEDTR (UniRef100_G7LH03 icov:99% qcovs:67.12% e-val:0)	secondary metabolism.flavonoids.flavonols.flavonol 3-O-glycosyltransferase		0.711659	0.0313538	0.034108	0.514437	0.0324547	0.0802833	0.629923	0.0399919	0.0785617	0.635287	0.55915	0.247695	0.989356	0.950462	0.692627	0.680058	0.621238	0.624557	1.12719	0.0882491	0.415986	0.752413	0.0579187	0.0447564
>generic|frv2_101812|p.sativum_wa1_contig10028_4	frv2_101812;P36181	p.sativum_wa1_contig10028_4 PREDICTED: heat shock cognate protein 80-like n=1 Tax=Cicer arietinum RepID=UPI00032A9675 (UniRef100_UPI00032A9675 icov:97% qcovs:96.42% e-val:0)	stress.abiotic.heat		0.792537	0.0260251	0.0306482	0.735237	0.032895	0.0808671	2.62247	0.242216	0.229786	1.13055	0.101551	0.0825098	1.09712	0.245101	0.482134	0.676292	0.396674	0.594506	0.850769	0.958881	0.698101	1.17186	0.102954	0.0585373
>generic|frv2_74996|Pisum_sativum_v2_Contig776_1	frv2_74996;O04834	Pisum_sativum_v2_Contig776_1 Ras-related small GTP-binding family protein n=1 Tax=Medicago truncatula RepID=A0A072UFB5_MEDTR (UniRef100_A0A072UFB5 icov:99% qcovs:97.93% e-val:2e-136)	signalling.G-proteins		1.31793	0.0119888	0.0191554	0.63902	0.0421583	0.0958961	0.967548	0.00381264	0.0177083	1.05001	0.335273	0.172165	1.00633	0.957474	0.692627	1.06084	0.804652	0.676259	0.952619	0.86008	0.678043	1.66421	0.523617	0.158424
>generic|frv2_51039|franssen_31533_5	frv2_51039;frv2_113122;Q94F09	franssen_31533_5 Protein disulfide isomerase-like protein, putative n=1 Tax=Medicago truncatula RepID=A0A072VPJ1_MEDTR (UniRef100_A0A072VPJ1 icov:98% qcovs:87.67% e-val:0)	redox.thioredoxin.PDIL		1.41327	0.0305572	0.033519	1.41472	0.049327	0.107271	0.510046	0.0441637	0.085039	1.25036	0.146757	0.10074	1.20195	0.159492	0.437584	0.509605	0.0500731	0.593758	0.671408	0.0333114	0.30986	2.29973	0.626286	0.179104
>generic|frv2_49049|franssen_30149_4	frv2_49049	franssen_30149_4 PREDICTED: 60S ribosomal protein L4-like n=1 Tax=Cicer arietinum RepID=UPI00032ABA0C (UniRef100_UPI00032ABA0C icov:96% qcovs:91.83% e-val:0)	protein.synthesis.ribosomal protein.eukaryotic.60S subunit.L4/L1		0.607521	0.00169053	0.00895714	0.702295	0.049813	0.107736	3.02949	0.251783	0.23429	1.15819	0.00573856	0.0158508	1.2385	0.223156	0.474074	1.8405	0.0890337	0.593758	0.740169	0.41345	0.560593	0.938086	0.456242	0.142093	X
>generic|frv2_81212|Pisum_sativum_v2_Contig4584_1	frv2_81212;frv2_49581;O80585	Pisum_sativum_v2_Contig4584_1 Methylenetetrahydrofolate reductase n=1 Tax=Medicago truncatula RepID=A0A072VS77_MEDTR (UniRef100_A0A072VS77 icov:99% qcovs:93.72% e-val:0)	C1-metabolism.methylenetetrahydrofolate reductase		1.20235	0.0380205	0.0383975	1.92133	0.286129	0.26836	0.461105	0.410375	0.275337	1.11652	0.567999	0.250458	1.33714	0.00359986	0.111951	0.957806	0.897008	0.71049	1.39748	0.416505	0.560593	2.14519	0.516623	0.156918
>generic|frv2_47759|franssen_29292_2	frv2_47759;frv2_80216;Q8S528	franssen_29292_2 NAD-dependent aldehyde dehydrogenase family protein n=2 Tax=Medicago truncatula RepID=A0A072U2G7_MEDTR (UniRef100_A0A072U2G7 icov:100% qcovs:88.82% e-val:0)	fermentation.aldehyde dehydrogenase		1.59121	0.00132227	0.00827828	1.51314	0.0960294	0.153504	0.869278	0.210889	0.214731	0.803968	0.0347904	0.0426521	1.25738	0.00748371	0.162328	1.346	0.465162	0.602515	0.635822	0.237332	0.549017	0.565636	0.0383396	0.0371099
>generic|frv2_83247|Pisum_sativum_v2_Contig5598_2	frv2_83247	Pisum_sativum_v2_Contig5598_2 Argininosuccinate synthase n=1 Tax=Medicago truncatula RepID=G7J524_MEDTR (UniRef100_G7J524 icov:99% qcovs:87.08% e-val:0)	amino acid metabolism.synthesis.glutamate family.arginine.arginosuccinate synthase		0.829299	0.0465975	0.0441197	1.13032	0.220278	0.23756	0.494731	0.525467	0.299017	1.1541	0.328717	0.169848	0.872435	0.0105646	0.186364	0.872121	0.669858	0.629304	1.26032	0.537741	0.580608	0.764021	0.116264	0.0618412	X
>generic|frv2_49586|franssen_30513_1	frv2_49586	franssen_30513_1 60S ribosomal protein L6 n=1 Tax=Medicago truncatula RepID=G7K669_MEDTR (UniRef100_G7K669 icov:88% qcovs:93.23% e-val:4e-129)	protein.synthesis.ribosomal protein.eukaryotic.60S subunit.L9		1.83076	0.000774909	0.00772219	1.28302	0.144439	0.195896	0.383262	0.249995	0.234285	1.07573	0.0467208	0.052725	1.41767	0.0106282	0.186364	1.02112	0.963235	0.720682	1.2533	0.643909	0.606723	1.4859	0.156706	0.071817	X
>generic|frv2_75243|Pisum_sativum_v2_Contig961_2	frv2_75243;frv2_75240;frv2_137096	Pisum_sativum_v2_Contig961_2 Translational elongation factor 1 subunit Bbeta n=1 Tax=Pisum sativum RepID=Q6SZ89_PEA (UniRef100_Q6SZ89 icov:90% qcovs:95.67% e-val:3e-133)	protein.synthesis.elongation		0.631725	0.00190119	0.00919221	0.893568	0.755149	0.360969	0.388152	0.43993	0.278689	1.09794	0.159189	0.106202	0.767236	0.0185235	0.226348	0.699143	0.45339	0.602515	0.305485	0.57391	0.589252	0.38034	0.388707	0.126994
>generic|frv2_74731|Pisum_sativum_v2_Contig588_5	frv2_74731;frv2_95161;frv2_95150;frv2_95153;frv2_74737;frv2_95147;frv2_45845	Pisum_sativum_v2_Contig588_5 Histone H2A n=1 Tax=Zea mays RepID=B6SI29_MAIZE (UniRef100_B6SI29 icov:96% qcovs:77.62% e-val:2e-70)	DNA.synthesis/chromatin structure.histone.core.H2A		1.80495	0.0011766	0.00796634	0.781483	0.0923434	0.151655	2.17024	0.144897	0.173856	0.912228	0.213887	0.124451	1.90562	0.0214221	0.23317	1.58213	0.200561	0.593758	1.24634	0.0407608	0.315244	1.18218	0.0417807	0.0389816
>generic|frv2_117426|p.sativum_wa1_contig23429_5	frv2_117426;frv2_49283	p.sativum_wa1_contig23429_5 PREDICTED: 31 kDa ribonucleoprotein, chloroplastic-like n=1 Tax=Cicer arietinum RepID=UPI00032AD106 (UniRef100_UPI00032AD106 icov:90% qcovs:79.8% e-val:5e-169)	RNA.RNA binding		0.809765	0.0390226	0.0391211	1.78321	0.177302	0.220351	2.47249	0.0741761	0.118009	1.06787	0.0224883	0.0337031	1.17168	0.0255714	0.249253	0.524123	0.384566	0.593758	1.34361	0.388334	0.560593	1.8228	0.515294	0.156718
>generic|mut34|Pisum_sativum_v2_Contig2209_m2	mut34;mut27	Pisum_sativum_v2_Contig2209_m2 no BLAST information available	protein.synthesis.elongation		0.740033	0.000632315	0.0071567	0.91813	0.430895	0.298912	0.831493	0.28391	0.245887	1.48964	0.00245884	0.0113362	1.12739	0.0321907	0.266112	0.653253	0.160883	0.593758	0.808103	0.892678	0.685443	1.49592	0.0198707	0.0274276
>generic|carvalho16792|PsCam021669_1_AA	P34788;frv2_75109	PsCam021669_1_AA 40S ribosomal protein S18 OS=Arabidopsis thaliana GN=RPS18A PE=1 SV=1 (sp	protein.synthesis.ribosomal protein.eukaryotic.40S subunit.S18		0.745422	0.0266313	0.030946	1.04569	0.905629	0.397385	0.772574	0.968599	0.407734	1.94764	0.0627706	0.0628156	1.40806	0.0432022	0.3073	1.50092	0.166356	0.593758	0.539003	0.014358	0.20423	1.81941	0.259512	0.0965087
>generic|frv2_82443|Pisum_sativum_v2_Contig5196_2	frv2_82443;frv2_59363	Pisum_sativum_v2_Contig5196_2 Aminoacylase-1 n=1 Tax=Glycine max RepID=I1LW56_SOYBN (UniRef100_I1LW56 icov:92% qcovs:78.75% e-val:0)	misc.nitrilases, *nitrile lyases, berberine bridge enzymes, reticuline oxidases, troponine reductases		1.32577	0.0224611	0.0291967	0.101825	0.789385	0.371501	0.440377	0.894086	0.38896	0.979373	0.017455	0.0291418	0.879231	0.0929644	0.376245	0.641264	0.00153871	0.254111	0.62079	0.00121162	0.0660645	1.08308	0.569929	0.168026
>generic|frv2_110910|p.sativum_wa1_contig17838_6	frv2_110910	p.sativum_wa1_contig17838_6 Probable sucrose-phosphate synthase n=1 Tax=Vicia faba RepID=SPSA_VICFA (UniRef100_Q43876 icov:99% qcovs:98.03% e-val:0)	major CHO metabolism.synthesis.sucrose.SPS		1.64581	0.00552708	0.0129432	0.842878	0.195148	0.227841	1.63551	0.912299	0.393774	0.933937	3.77527e-05	0.00189712	0.87519	0.0959022	0.378925	1.72574	0.00566755	0.534842	0.984278	0.134685	0.48015	0.947284	0.00138158	0.00658253	X
>generic|carvalho13607|PsCam013138_1_AA	Q05091;frv2_75910;frv2_96732	PsCam013138_1_AA Polygalacturonase inhibitor OS=Pyrus communis GN=PGIP PE=1 SV=1 (sp	cell wall.degradation.pectate lyases and polygalacturonases		1.60985	0.00646717	0.0139714	1.01377	0.201475	0.229805	3.187	0.260511	0.237859	1.06487	0.0134784	0.0247405	1.21304	0.123689	0.405919	0.841455	0.0307089	0.593758	1.22882	0.113597	0.445075	1.9938	0.06508	0.0470734
>generic|frv2_48552|franssen_29817_3	frv2_48552;Q9SA73;frv2_80294	franssen_29817_3 Obg-like ATPase 1 n=1 Tax=Medicago truncatula RepID=G7IKV9_MEDTR (UniRef100_G7IKV9 icov:93% qcovs:97.97% e-val:0)	not assigned.unknown		1.51912	0.0290519	0.0324445	0.276927	0.498752	0.306875	0.917585	0.265337	0.238611	0.670709	0.00478624	0.0145439	1.02281	0.782958	0.648078	1.43865	0.369978	0.593758	0.35445	0.529149	0.577495	0.537518	0.0176929	0.0259051
>generic|frv2_81040|Pisum_sativum_v2_Contig4498_3	frv2_81040;O23627;frv2_57154	Pisum_sativum_v2_Contig4498_3 Glycyl-tRNA synthetase/glycine-tRNA ligase n=1 Tax=Medicago truncatula RepID=A0A072U6L4_MEDTR (UniRef100_A0A072U6L4 icov:95% qcovs:94.9% e-val:0)	protein.aa activation.glycine-tRNA ligase		1.50869	0.00393554	0.01155	0.398113	0.692087	0.344163	0.556659	0.763208	0.358091	1.74866	0.251198	0.138865	0.986575	0.925713	0.689219	1.43831	0.484195	0.606728	0.426919	0.414607	0.560593	0.281435	0.08078	0.0530806
>generic|carvalho9887|PsCam006651_1_AA	Q39PS9;frv2_111235	PsCam006651_1_AA Protein TolB OS=Geobacter metallireducens (strain GS-15 / ATCC 53774 / DSM 7210) GN=tolB PE=3 SV=1 (sp	not assigned.no ontology		1.78986	0.00704611	0.0141549	0.0134833	0.676137	0.34309	0.677024	0.722455	0.347349	1.67074	0.0740145	0.0685354	1.05346	0.581502	0.598053	1.35106	0.617938	0.622916	0.582742	0.347011	0.560593	0.678481	0.0833308	0.0538466
>generic|carvalho31827|PsCam045610_1_AA	Q8L733;frv2_112596;frv2_62746	PsCam045610_1_AA Putative transferase At4g12130, mitochondrial OS=Arabidopsis thaliana GN=At4g12130 PE=1 SV=1 (sp	not assigned.no ontology		1.59109	0.043897	0.0424806	0.26739	0.331978	0.27944	1.2533	0.0389746	0.0773312	1.25465	0.072864	0.0683848	0.771527	0.260249	0.488395	1.09009	0.85597	0.697213	0.920761	0.920978	0.691797	2.74522	0.207682	0.083873
>generic|carvalho38222|PsCam055019_1_AA	Q9SSN0	PsCam055019_1_AA Protein ROOT HAIR DEFECTIVE 3 homolog 1 OS=Arabidopsis thaliana GN=At1g72960 PE=2 SV=2 (sp	development.unspecified		1.74954	0.00340178	0.0110539	0.255288	0.379092	0.287988	0.479282	0.422621	0.277205	1.24053	0.00992161	0.0212704	0.937225	0.684479	0.6185	1.07357	0.887817	0.709344	1.74358	0.594942	0.59255	3.42449	0.062832	0.0465297	X
>generic|frv2_52473|franssen_32514_6	frv2_52473;Q9SGA6;frv2_74185;frv2_110796	franssen_32514_6 PREDICTED: 40S ribosomal protein S19-1-like n=1 Tax=Cicer arietinum RepID=UPI00032A4F62 (UniRef100_UPI00032A4F62 icov:90% qcovs:95.1% e-val:1e-97)	protein.synthesis.ribosomal protein.eukaryotic.40S subunit.S19		0.872404	0.00320535	0.0108056	0.0449599	0.477409	0.302738	1.31016	0.526702	0.299074	0.964649	0.0673781	0.0653854	1.03258	0.753405	0.638239	0.993242	0.969791	0.720682	0.825994	0.0280619	0.286533	0.819838	0.088576	0.0549526
>generic|carvalho34406|PsCam049357_1_AA	Q06801	PsCam049357_1_AA 4-alpha-glucanotransferase, chloroplastic/amyloplastic OS=Solanum tuberosum GN=DPEP PE=1 SV=1 (sp	major CHO metabolism.degradation.starch.D enzyme		1.279	0.0403457	0.0400547	0.172636	0.424035	0.298912	1.80728	0.0381234	0.0760434	1.13398	0.370343	0.18671	1.0455	0.704423	0.624206	0.976528	0.971515	0.720682	1.95855	0.518818	0.575368	2.95433	0.189831	0.0790749	X
>generic|frv2_76158|Pisum_sativum_v2_Contig1660_4	frv2_76158;frv2_46532	Pisum_sativum_v2_Contig1660_4 Uncharacterized protein n=1 Tax=Medicago truncatula RepID=I3TAJ1_MEDTR (UniRef100_I3TAJ1 icov:92% qcovs:86.76% e-val:1e-141)	misc.glutathione S transferases		1.47936	0.00451361	0.0121952	0.105317	0.101864	0.159988	1.44528	0.00656467	0.0250333	0.715232	0.164893	0.107848	1.00072	0.996686	0.702925	0.890484	0.75057	0.663667	0.558033	0.59882	0.593857	0.591414	0.576724	0.168799
>generic|frv2_110926|p.sativum_wa1_contig17855_5	frv2_110926	p.sativum_wa1_contig17855_5 Coatomer subunit beta n=57 Tax=Trifolieae RepID=A0A072UGQ1_MEDTR (UniRef100_A0A072UGQ1 icov:99% qcovs:97.58% e-val:0)	cell.vesicle transport		0.84687	0.0290293	0.0324445	0.357038	0.249772	0.249641	2.25196	0.55516	0.305245	0.842713	0.000130101	0.00348548	0.896143	0.603934	0.606789	0.871015	0.798806	0.676259	1.28866	0.0529019	0.337934	4.08341	0.160991	0.0723591	X
>generic|carvalho16333|PsCam020963_1_AA	M1CZC0;frv2_82685	PsCam020963_1_AA ERBB-3 BINDING PROTEIN 1 OS=Solanum tuberosum GN=EBP1 PE=2 SV=1 (sp	protein.degradation		1.40449	0.0144411	0.0212986	0.426251	0.649125	0.339839	0.375057	0.721855	0.347349	1.25679	0.060462	0.0621913	0.964601	0.830796	0.665712	0.859693	0.668759	0.629304	1.80604	0.478274	0.564873	1.57522	0.323733	0.112044
>generic|carvalho17724|PsCam023279_1_AA	P02858;frv2_74048	PsCam023279_1_AA Glycinin G4 OS=Glycine max GN=GY4 PE=1 SV=1 (sp	development.storage proteins		0.839434	0.00342312	0.0110539	0.0696346	0.136962	0.192496	0.607416	0.239875	0.228681	0.730593	0.401817	0.19546	0.815491	0.122969	0.405919	0.858966	0.80673	0.676896	0.74615	0.0544027	0.342271	0.947112	0.0267644	0.0310534
>generic|carvalho16243|PsCam020846_1_AA	P49298;frv2_58644;frv2_81780	PsCam020846_1_AA Citrate synthase, mitochondrial OS=Citrus maxima GN=CIT PE=2 SV=1 (sp	TCA / org transformation.TCA.CS		0.713113	0.0342988	0.0363451	0.0373743	0.116143	0.17449	0.6606	0.0935038	0.133824	1.24687	0.124073	0.0936859	1.21475	0.691684	0.6185	0.854839	0.808344	0.676896	1.08859	0.624027	0.60631	1.63604	0.147667	0.0701214
>generic|frv2_75308|Pisum_sativum_v2_Contig1011_3	frv2_75308	Pisum_sativum_v2_Contig1011_3 Lactoylglutathione lyase-like protein n=3 Tax=Medicago truncatula RepID=G7JJ87_MEDTR (UniRef100_G7JJ87 icov:94% qcovs:84.78% e-val:5e-173)	Biodegradation of Xenobiotics.lactoylglutathione lyase		0.840358	0.0175854	0.0244105	0.0608066	0.967761	0.415436	6.99246	0.41754	0.275732	0.89428	0.00861244	0.0197337	1.01156	0.839721	0.666991	0.820155	0.489585	0.606728	1.54968	0.563543	0.589252	3.0927	0.202599	0.0823351	X
>generic|frv2_85371|Pisum_sativum_v2_Contig6662_2	frv2_85371	Pisum_sativum_v2_Contig6662_2 PREDICTED: aldo-keto reductase family 4 member C9-like isoform X1 n=1 Tax=Cicer arietinum RepID=UPI00032AAD5E (UniRef100_UPI00032AAD5E icov:99% qcovs:91.69% e-val:0)	minor CHO metabolism.others		1.97081	0.0339349	0.0361467	0.176783	0.976305	0.417294	3.38218	0.372601	0.262513	1.47557	0.00279811	0.0113362	0.927099	0.630617	0.612395	0.794648	0.618438	0.622916	0.698747	0.323761	0.560593	4.65827	0.0981424	0.0574017	X
>generic|frv2_95545|p.sativum_wa1_contig02214_4	frv2_95545;frv2_48121;Q8W171	p.sativum_wa1_contig02214_4 PREDICTED: peptidyl-prolyl cis-trans isomerase 1-like n=1 Tax=Glycine max RepID=UPI000189D78D (UniRef100_UPI000189D78D icov:99% qcovs:93.02% e-val:1e-115)	cell.cycle.peptidylprolyl isomerase		1.19977	0.0230891	0.0295129	0.0273489	0.0894744	0.149423	0.572111	0.0296818	0.0644972	1.05931	0.523332	0.235597	0.908432	0.271778	0.490887	0.740553	0.220117	0.593758	1.04334	0.765102	0.643607	2.40251	0.279243	0.101305
>generic|carvalho29815|PsCam042446_1_AA	O48844;frv2_74575	PsCam042446_1_AA 26S proteasome non-ATPase regulatory subunit 1 homolog A OS=Arabidopsis thaliana GN=RPN2A PE=1 SV=1 (sp	protein.degradation.ubiquitin.proteasom		1.61482	0.0170814	0.0240836	0.00567911	0.332158	0.27944	0.272973	0.289306	0.246753	0.581872	0.472727	0.220278	1.10577	0.359606	0.521886	0.68054	0.564601	0.618661	0.549913	0.389016	0.560593	1.04315	0.260754	0.0967031
>generic|carvalho30352|PsCam043278_1_AA	O64416;frv2_95386	PsCam043278_1_AA Ribulose bisphosphate carboxylase small chain, chloroplastic OS=Marchantia paleacea GN=RBCS PE=2 SV=1 (sp	PS.calvin cycle.rubisco small subunit		0.671002	0.00181268	0.00914431	0.0545434	0.201164	0.229805	0.666936	0.0116533	0.0356904	0.959604	0.471244	0.219895	0.837228	0.295211	0.496739	0.680266	0.532977	0.613588	1.31394	0.0777552	0.395802	0.98791	0.106958	0.0595901
>generic|frv2_78865|Pisum_sativum_v2_Contig3337_2	frv2_78865	Pisum_sativum_v2_Contig3337_2 Fructose-bisphosphate aldolase, cytoplasmic isozyme 2 n=1 Tax=Pisum sativum RepID=ALF2_PEA (UniRef100_P46257 icov:96% qcovs:98.33% e-val:0)	glycolysis.cytosolic branch.aldolase		0.788664	0.00492418	0.0123958	0.260171	0.221534	0.238173	1.45425	0.74937	0.35405	0.580104	0.062709	0.0628156	1.00338	0.975764	0.697188	0.631241	0.342345	0.593758	0.835155	0.159036	0.48784	1.23713	0.0440332	0.0401237	X
>generic|frv2_127204|p.sativum_wa1_contig30155_4	frv2_127204	p.sativum_wa1_contig30155_4 Seed linoleate 9S-lipoxygenase-2 n=1 Tax=Pisum sativum RepID=LOX2_PEA (UniRef100_P14856 icov:92% qcovs:100% e-val:9e-173)	hormone metabolism.jasmonate.synthesis-degradation.lipoxygenase		0.632476	0.00310579	0.0107414	0.409771	0.151194	0.19866	0.618365	0.114254	0.151767	0.90519	0.00577282	0.0158508	0.99712	0.979368	0.697188	0.629622	0.514767	0.60777	0.474359	0.0186269	0.229958	0.56098	0.0323761	0.0335876	X
>generic|frv2_54052|franssen_33574_2	frv2_54052;frv2_107220;frv2_79557	franssen_33574_2 Divalent cation tolerance protein, CutA1 family protein n=2 Tax=Medicago truncatula RepID=G7J568_MEDTR (UniRef100_G7J568 icov:98% qcovs:91.91% e-val:3e-110)	metal handling.binding, chelation and storage		0.71681	0.0058485	0.01329	0.433292	0.688596	0.344163	1.70833	0.507665	0.294718	0.949051	0.0164106	0.028168	0.934654	0.609778	0.609839	0.625649	0.273157	0.593758	0.952578	0.571414	0.589252	1.14316	0.0698134	0.0486132
>generic|carvalho41008|PsCam058749_1_AA	C5E0G6	PsCam058749_1_AA Vacuolar membrane protease OS=Zygosaccharomyces rouxii (strain ATCC 2623 / CBS 732 / NBRC 1130 / NCYC 568 / NRRL Y-229) GN=ZYRO0G12540g PE=3 SV=1 (sp	not assigned.unknown		1.47859	0.0161506	0.0231522	0.101663	0.476964	0.302738	0.424174	0.680187	0.337893	0.859059	0.302134	0.159841	1.00294	0.991507	0.702925	0.576218	0.373901	0.593758	0.593478	0.0531968	0.337934	1.27107	0.0181355	0.026114	X
>generic|carvalho39477|PsCam056807_1_AA	Q1SGF1	PsCam056807_1_AA Putative poly [ADP-ribose] polymerase 3 OS=Medicago truncatula GN=PARP3 PE=3 SV=1 (sp	protein.postranslational modification		0.586625	0.0013667	0.00831458	0.455168	0.429588	0.298912	0.331168	0.727928	0.349118	1.05368	0.0249607	0.0352122	1.16622	0.440838	0.554755	0.569434	0.428479	0.600818	3.6551	0.0780341	0.395802	1.3431	0.0173238	0.0259051	X
>generic|frv2_82528|Pisum_sativum_v2_Contig5239_3	frv2_82528	Pisum_sativum_v2_Contig5239_3 Phosphopyruvate hydratase n=1 Tax=Medicago truncatula RepID=A0A072U338_MEDTR (UniRef100_A0A072U338 icov:93% qcovs:98.2% e-val:0)	glycolysis.cytosolic branch.enolase		0.837181	0.0220476	0.0290282	0.0372501	0.139668	0.194002	1.7175	0.214715	0.215307	1.15364	0.115446	0.0900053	0.951977	0.44241	0.554755	0.564877	0.0551538	0.593758	1.36659	0.886777	0.685037	1.08492	0.0294272	0.0319237	X
>generic|frv2_118765|p.sativum_wa1_contig24454_5	frv2_118765;O04202;frv2_118133	p.sativum_wa1_contig24454_5 PREDICTED: eukaryotic translation initiation factor 3 subunit F-like isoform X1 n=1 Tax=Cicer arietinum RepID=UPI00032AABEA (UniRef100_UPI00032AABEA icov:98% qcovs:96.18% e-val:0)	protein.degradation.ubiquitin.proteasom		1.78275	0.0344917	0.0363611	0.491595	0.884734	0.394781	0.194856	0.803518	0.369689	0.58874	0.0234537	0.0341764	0.951043	0.828594	0.665599	0.533123	0.531495	0.613588	0.517548	0.312466	0.560593	0.367968	0.119021	0.0623912
>generic|frv2_47502|franssen_29127_2	frv2_47502;frv2_97164;Q9FRL8	franssen_29127_2 PREDICTED: glutathione S-transferase DHAR2-like isoform X2 n=1 Tax=Cicer arietinum RepID=UPI00032A97E1 (UniRef100_UPI00032A97E1 icov:96% qcovs:85% e-val:9e-96)	redox.ascorbate and glutathione.ascorbate		1.18848	0.0288306	0.0324445	0.440711	0.213906	0.235173	1.28513	0.114444	0.151767	1.0865	0.000814949	0.00694249	1.01437	0.834929	0.665712	0.494411	0.152028	0.593758	0.527206	0.18492	0.504145	0.732447	0.463794	0.14406
>generic|frv2_84614|Pisum_sativum_v2_Contig6283_3	frv2_84614;Q5B998	Pisum_sativum_v2_Contig6283_3 Homoserine dehydrogenase n=2 Tax=Medicago truncatula RepID=B7FM35_MEDTR (UniRef100_B7FM35 icov:99% qcovs:90.16% e-val:0)	amino acid metabolism.synthesis.aspartate family.misc.homoserine.homoserine dehydrogenase		0.566749	0.0023131	0.0099869	0.4842	0.477696	0.302738	2.68106	0.0831113	0.123965	1.05702	0.164242	0.107848	0.937228	0.515241	0.572128	0.461365	0.224218	0.593758	2.66204	0.934298	0.692726	4.24559	0.134031	0.0670932
>generic|frv2_123280|p.sativum_wa1_contig27653_4	frv2_123280	p.sativum_wa1_contig27653_4 PREDICTED: stem-specific protein TSJT1-like n=1 Tax=Cicer arietinum RepID=UPI00032AC295 (UniRef100_UPI00032AC295 icov:99% qcovs:94.49% e-val:6e-163)	metal handling		0.743032	0.001627	0.00895714	0.200814	0.0613587	0.119632	1.03313	0.418784	0.27592	0.878479	0.620556	0.264324	0.94261	0.781609	0.648078	0.458001	0.265122	0.593758	0.555396	0.763345	0.643607	0.909355	0.251652	0.0944281	X
>generic|frv2_52957|franssen_32850_1	frv2_52957;Q9ZVH7;frv2_75057;frv2_95418	franssen_32850_1 Non-green plastid inner envelope membrane protein n=1 Tax=Medicago truncatula RepID=G7KY60_MEDTR (UniRef100_G7KY60 icov:100% qcovs:84.25% e-val:4e-168)	not assigned.unknown		0.668917	0.00488612	0.0123958	0.451878	0.645592	0.338887	1.05736	0.883953	0.386496	1.13607	0.817392	0.313228	1.36724	0.0847713	0.369659	0.376134	0.373901	0.593758	1.13165	0.517845	0.575265	1.84242	4.75077e-05	0.000852474
>generic|frv2_88821|Pisum_sativum_v2_Contig8384_4	frv2_88821	Pisum_sativum_v2_Contig8384_4 Oleosin n=1 Tax=Medicago truncatula RepID=G7I2Z9_MEDTR (UniRef100_G7I2Z9 icov:88% qcovs:83.22% e-val:2e-75)	lipid metabolism.TAG synthesis		0.508131	0.0183289	0.0252143	0.198891	0.265558	0.256356	0.921503	0.0862502	0.127171	0.740763	0.23959	0.134689	0.69619	0.123011	0.405919	0.329094	0.482669	0.606728	0.974637	0.193417	0.510574	1.83862	0.0390935	0.0376833	X
>generic|frv2_135689|p.sativum_wa1_contig35061_6	frv2_135689;A7TH64	p.sativum_wa1_contig35061_6 Plant/T22K18-16 protein, putative n=1 Tax=Medicago truncatula RepID=A0A072U4P3_MEDTR (UniRef100_A0A072U4P3 icov:82% qcovs:74.07% e-val:3e-48)	not assigned.unknown		0.611905	0.0360337	0.0372193	0.120366	0.179313	0.220351	0.405649	0.0154871	0.0418324	0.594391	0.0204351	0.0321362	0.600583	0.0536752	0.321594	0.0463919	0.323879	0.593758	0.636324	0.499079	0.569392	1.34543	0.00798954	0.0172567
>generic|frv2_80935|Pisum_sativum_v2_Contig4445_5	frv2_80935	Pisum_sativum_v2_Contig4445_5 Vicilin 47k n=1 Tax=Pisum sativum RepID=D3VND7_PEA (UniRef100_D3VND7 icov:71% qcovs:91.26% e-val:2e-127)	development.storage proteins		0.507459	0.0368077	0.0377644	0.827024	0.091306	0.151206	0.601514	0.696446	0.342898	1.38792	0.141059	0.0994181	1.65408	0.412596	0.544356	0.0838894	0.331432	0.593758	2.8255	0.579609	0.589252	4.57401	0.106179	0.0595901	X
>generic|carvalho36622|PsCam052207_1_AA	P38505;frv2_99475;frv2_76937;frv2_51905;frv2_100312	PsCam052207_1_AA Calcium-binding protein OS=Entamoeba histolytica PE=1 SV=2 (sp	signalling.calcium		0.586089	0.00176234	0.00914431	0.879963	0.0698123	0.128561	0.385859	0.309725	0.251914	1.0985	0.80181	0.309758	1.01601	0.809331	0.656586	0.264273	0.176068	0.593758	1.32713	0.997672	0.70742	1.78422	0.00300886	0.00998059
>generic|frv2_11113|franssen_6495_1	frv2_11113	franssen_6495_1 Late embryogenesis abundant protein n=1 Tax=Medicago truncatula RepID=G7KVD1_MEDTR (UniRef100_G7KVD1 icov:73% qcovs:78.95% e-val:1e-31)	not assigned.unknown		0.519605	0.00524543	0.0125715	0.882296	0.370814	0.286797	0.413363	0.00149998	0.00956447	0.506306	0.00113894	0.00887782	0.623537	0.0501263	0.313365	0.275945	0.283959	0.593758	1.24476	0.0706897	0.38153	1.3715	0.00347464	0.0112574	X
>generic|frv2_49570|franssen_30501_1	frv2_49570;Q55DP8	franssen_30501_1 Aminoacylase-1 n=1 Tax=Medicago truncatula RepID=G7IBI0_MEDTR (UniRef100_G7IBI0 icov:95% qcovs:82.06% e-val:0)	protein.degradation		0.769059	0.00462063	0.0122197	1.75687	0.33534	0.27944	0.996129	0.142022	0.172728	0.887452	0.0754944	0.0687774	0.959628	0.589027	0.600121	0.280906	0.10982	0.593758	1.08479	0.556671	0.588905	0.913173	0.0567992	0.0447011
>generic|frv2_85832|Pisum_sativum_v2_Contig6893_2	frv2_85832;frv2_49641;Q6INR1;frv2_6542	Pisum_sativum_v2_Contig6893_2 PREDICTED: eukaryotic translation initiation factor 3 subunit J-A-like n=1 Tax=Cicer arietinum RepID=UPI00032A6862 (UniRef100_UPI00032A6862 icov:81% qcovs:86.4% e-val:2e-110)	protein.synthesis.initiation		0.592218	0.00494462	0.0123958	1.81895	0.643935	0.338541	0.909321	0.138736	0.170768	0.843227	0.213496	0.124451	1.16379	0.253301	0.485115	0.306899	0.238017	0.593758	1.25472	0.847598	0.672875	1.22676	0.005454	0.0135471
>generic|frv2_129745|p.sativum_wa1_contig31710_2	frv2_129745	p.sativum_wa1_contig31710_2 PREDICTED: 10 kDa chaperonin-like n=1 Tax=Cicer arietinum RepID=UPI00032A5E8C (UniRef100_UPI00032A5E8C icov:94% qcovs:97.94% e-val:7e-61)	protein.postranslational modification		0.634748	0.00500329	0.0123958	0.554584	0.0624667	0.120604	1.92077	0.301226	0.251223	1.27423	0.670096	0.276905	1.05123	0.550092	0.582012	0.309192	0.366479	0.593758	0.889657	0.190598	0.509022	1.05855	0.0013827	0.00658253	X
>generic|frv2_80437|Pisum_sativum_v2_Contig4189_1	frv2_80437;frv2_46927;frv2_2843	Pisum_sativum_v2_Contig4189_1 Endochitinase A2 n=1 Tax=Pisum sativum RepID=CHI2_PEA (UniRef100_P21226 icov:98% qcovs:99.07% e-val:0)	stress.biotic		1.34585	0.000829738	0.00789628	0.643418	0.902876	0.397376	0.88006	0.435337	0.2785	0.663602	0.747913	0.296377	0.88111	0.556975	0.585163	0.321642	0.202902	0.593758	0.90349	0.838021	0.672402	1.98477	0.0113185	0.0207896
>generic|frv2_49925|franssen_30747_3	frv2_49925	franssen_30747_3 Uncharacterized protein n=1 Tax=Medicago truncatula RepID=A0A072V6Y2_MEDTR (UniRef100_A0A072V6Y2 icov:95% qcovs:76.47% e-val:3e-37)	not assigned.unknown		0.519105	0.0252593	0.0306482	1.7911	0.546367	0.318576	1.225	0.456939	0.281549	2.78786	0.0583163	0.0611196	0.768777	0.294684	0.496739	0.324854	0.373901	0.593758	0.855365	0.585834	0.591538	1.42412	0.0187145	0.0266296	X
>generic|frv2_108632|p.sativum_wa1_contig15660_4	frv2_108632;frv2_91750	p.sativum_wa1_contig15660_4 Ran-binding protein 2, Ran-binding domain protein n=1 Tax=Medicago truncatula RepID=I3T4L2_MEDTR (UniRef100_I3T4L2 icov:94% qcovs:89.09% e-val:3e-131)	signalling.G-proteins		0.669387	0.0128624	0.0197718	1.10771	0.686431	0.344163	0.435993	0.843463	0.380688	0.870873	0.828158	0.315896	0.736817	0.237919	0.479687	0.333794	0.423661	0.600818	1.11286	0.735787	0.637487	4.17022	0.0985068	0.0574017
>generic|frv2_104937|p.sativum_wa1_contig12891_4	frv2_104937;Q08480;frv2_79012	p.sativum_wa1_contig12891_4 Adenylate kinase n=1 Tax=Medicago truncatula RepID=B7FN18_MEDTR (UniRef100_B7FN18 icov:92% qcovs:93% e-val:3e-163)	nucleotide metabolism.phosphotransfer and pyrophosphatases.adenylate kinase		0.577669	0.00806789	0.0149553	1.03464	0.0551512	0.11369	6.8039	0.059093	0.063573	0.988584	0.190748	0.116275	1.13693	0.371771	0.525527	0.341183	0.208283	0.593758	1.58106	0.514596	0.575265	4.26721	0.0563134	0.0447011
>generic|frv2_101401|p.sativum_wa1_contig09581_5	frv2_101401;O49447;frv2_90769	p.sativum_wa1_contig09581_5 ADP/ATP carrier protein n=2 Tax=Medicago truncatula RepID=A0A072UXU6_MEDTR (UniRef100_A0A072UXU6 icov:97% qcovs:93.53% e-val:0)	transport.metabolite transporters at the envelope membrane		1.94943	0.000926637	0.00789628	1.06907	0.637604	0.338541	0.399913	0.161225	0.185744	0.601689	0.164785	0.107848	1.03483	0.700931	0.622802	0.364	0.229555	0.593758	0.605442	0.96973	0.698429	1.26118	0.0213391	0.0278661
>generic|carvalho17997|PsCam023665_1_AA	O64583	PsCam023665_1_AA Probable protein phosphatase 2C 28 OS=Arabidopsis thaliana GN=At2g34740 PE=2 SV=2 (sp	protein.postranslational modification		0.58716	0.0171144	0.0240836	0.581288	0.969538	0.415562	0.852153	0.787292	0.365278	0.972141	0.00811394	0.0188515	0.874045	0.181498	0.442581	0.364033	0.306399	0.593758	1.27339	0.661038	0.611772	1.79425	0.0093331	0.0190508	X
>generic|frv2_16747|franssen_9857_4	frv2_16747;frv2_97100;P52855	franssen_9857_4 PREDICTED: 60S acidic ribosomal protein P1-like n=1 Tax=Populus euphratica RepID=UPI00057B021A (UniRef100_UPI00057B021A icov:84% qcovs:59.52% e-val:1e-15)	not assigned.unknown		0.569024	0.00818215	0.0150039	0.694139	0.0721846	0.131056	1.26199	0.459833	0.281549	1.13733	0.0852837	0.0739745	1.17227	0.286418	0.496739	0.367438	0.148	0.593758	1.04915	0.708548	0.630488	1.70964	0.00939183	0.0190508
>generic|frv2_45967|franssen_28212_1	frv2_45967	franssen_28212_1 Translational elongation factor 1 subunit Bbeta n=1 Tax=Pisum sativum RepID=Q6SZ89_PEA (UniRef100_Q6SZ89 icov:94% qcovs:100% e-val:7e-163)	protein.synthesis.elongation		1.18403	0.00154181	0.0087873	1.58441	0.632392	0.338541	0.21117	0.578403	0.309032	0.637549	0.0782679	0.0698357	1.75644	0.292356	0.496739	0.386671	0.196819	0.593758	1.66275	0.228947	0.549017	2.02	0.191132	0.0791926	X
>generic|frv2_83218|Pisum_sativum_v2_Contig5583_6	frv2_83218;frv2_48266;Q6K9N6	Pisum_sativum_v2_Contig5583_6 Succinyl-CoA ligase subunit beta n=1 Tax=Medicago truncatula RepID=A0A072VL01_MEDTR (UniRef100_A0A072VL01 icov:93% qcovs:96.2% e-val:0)	TCA / org transformation.TCA.succinyl-CoA ligase		0.70964	0.00646593	0.0139714	1.71687	0.903601	0.397376	0.277844	0.144328	0.173856	0.726833	0.904375	0.33392	1.36535	0.125864	0.407256	0.388365	0.125308	0.593758	0.436235	0.384308	0.560593	1.41306	0.0462213	0.041153
>generic|frv2_49468|franssen_30434_3	frv2_49468;frv2_120811;frv2_105360;O80575	franssen_30434_3 PREDICTED: 6,7-dimethyl-8-ribityllumazine synthase, chloroplastic-like isoform X1 n=1 Tax=Cicer arietinum RepID=UPI00032A6FD1 (UniRef100_UPI00032A6FD1 icov:90% qcovs:84.91% e-val:1e-137)	Co-factor and vitamine metabolism.riboflavin.riboflavin synthase		1.43791	0.035065	0.0367132	1.5875	0.667994	0.34247	0.206311	0.544825	0.303168	0.879249	0.077908	0.0698357	1.01336	0.952889	0.692627	0.40101	0.460815	0.602515	2.02849	0.614282	0.601692	2.22122	0.329547	0.112909
>generic|frv2_108911|p.sativum_wa1_contig15864_6	frv2_108911;Q9SVM8	p.sativum_wa1_contig15864_6 Glycine-rich RNA-binding protein n=1 Tax=Pisum sativum RepID=P93486_PEA (UniRef100_P93486 icov:89% qcovs:100% e-val:4e-98)	RNA.RNA binding		0.726658	0.0148285	0.0217655	0.872568	0.420657	0.298912	11.0448	0.652868	0.329258	1.60884	0.175245	0.11048	1.0881	0.41358	0.544356	0.40365	0.214814	0.593758	1.9376	0.846916	0.672875	72.7835	0.0523799	0.0220449
>generic|frv2_131258|p.sativum_wa1_contig32572_5	frv2_131258;frv2_133501	p.sativum_wa1_contig32572_5 PREDICTED: protein transport protein Sec61 subunit beta-like n=1 Tax=Cicer arietinum RepID=UPI00032A7E06 (UniRef100_UPI00032A7E06 icov:76% qcovs:88.79% e-val:2e-52)	protein.targeting.secretory pathway.unspecified		0.624312	0.00706443	0.0141549	1.00355	0.516393	0.309045	0.20756	0.997057	0.414775	0.828064	0.00198685	0.0111345	0.803052	0.47444	0.563493	0.40445	0.117811	0.593758	0.266952	0.179243	0.499043	0.622098	0.0510828	0.0627161
>generic|frv2_101335|p.sativum_wa1_contig09503_4	frv2_101335	p.sativum_wa1_contig09503_4 Uncharacterized protein n=1 Tax=Medicago truncatula RepID=I3SL27_MEDTR (UniRef100_I3SL27 icov:87% qcovs:89.15% e-val:5e-155)	not assigned.no ontology		0.568431	0.0305938	0.033519	1.04643	0.813219	0.376643	0.114401	0.488779	0.292036	0.516703	0.63577	0.267715	1.05282	0.788742	0.651209	0.40743	0.179721	0.593758	0.582984	0.790756	0.653281	1.21406	0.000259601	0.00250618	X
>generic|frv2_113075|p.sativum_wa1_contig19890_5	frv2_113075;Q9SDS7	p.sativum_wa1_contig19890_5 Uncharacterized protein n=1 Tax=Medicago truncatula RepID=G7KW90_MEDTR (UniRef100_G7KW90 icov:95% qcovs:96.3% e-val:0)	transport.p- and v-ATPases		0.763941	0.0138819	0.0206727	1.49513	0.496664	0.306346	0.576817	0.182527	0.19558	0.721432	0.0857222	0.0739745	1.23896	0.35048	0.515593	0.428957	0.330091	0.593758	1.20095	0.587916	0.591814	3.586	0.124083	0.0635288
>generic|frv2_54699|franssen_33990_2	frv2_54699;frv2_111661	franssen_33990_2 PREDICTED: probable mitochondrial-processing peptidase subunit beta-like n=1 Tax=Cicer arietinum RepID=UPI00032A9288 (UniRef100_UPI00032A9288 icov:95% qcovs:94.92% e-val:0)	protein.targeting.mitochondria		1.29032	0.0251259	0.0306482	1.54901	0.3738	0.286797	1.0078	0.322991	0.255224	0.914393	0.00259324	0.0113362	0.975452	0.793938	0.65176	0.43015	0.268142	0.593758	1.01978	0.431938	0.560593	1.69755	0.365182	0.121869
>generic|frv2_76893|Pisum_sativum_v2_Contig2140_5	frv2_76893;Q9LF46	Pisum_sativum_v2_Contig2140_5 PREDICTED: 2-hydroxyacyl-CoA lyase-like n=1 Tax=Cicer arietinum RepID=UPI00032AA8E7 (UniRef100_UPI00032AA8E7 icov:99% qcovs:87.63% e-val:0)	fermentation.PDC		1.31164	0.00457164	0.0121952	0.709277	0.822912	0.377034	1.24209	0.929957	0.396183	0.939768	0.727066	0.292343	0.999023	0.995443	0.702925	0.438708	0.44385	0.602515	1.53692	0.80418	0.659376	2.48642	0.185269	0.0781516
>generic|frv2_48374|franssen_29693_2	frv2_48374	franssen_29693_2 Inosine-5-monophosphate dehydrogenase n=1 Tax=Medicago truncatula RepID=G7KZG9_MEDTR (UniRef100_G7KZG9 icov:96% qcovs:91.43% e-val:0)	nucleotide metabolism.synthesis.purine.IMP dehydrogenase		1.76007	2.78955e-06	0.000285251	1.10197	0.869289	0.390531	1.05454	0.326926	0.256485	1.11573	0.030417	0.0388657	1.01046	0.894286	0.682585	0.440802	0.28543	0.593758	1.55307	0.896379	0.685443	2.14786	0.0656741	0.047138	X
>generic|frv2_89622|Pisum_sativum_v2_Contig8795_3	frv2_89622;frv2_4904;frv2_112839;Q9SEI4	Pisum_sativum_v2_Contig8795_3 PREDICTED: 26S protease regulatory subunit 6B homolog isoform X2 n=1 Tax=Cicer arietinum RepID=UPI00032A9112 (UniRef100_UPI00032A9112 icov:94% qcovs:98.33% e-val:0)	protein.degradation.ubiquitin.proteasom		0.85031	0.0421212	0.0414154	0.818837	0.594949	0.333536	0.901495	0.535623	0.301936	0.850895	0.393028	0.192879	1.0775	0.420178	0.547231	0.444266	0.055688	0.593758	1.06821	0.915122	0.691797	1.74019	0.0406876	0.038171
>generic|frv2_95050|p.sativum_wa1_contig00209_4	frv2_95050	p.sativum_wa1_contig00209_4 7S storage protein alpha subunit n=1 Tax=Glycine max RepID=Q39816_SOYBN (UniRef100_Q39816 icov:100% qcovs:75.61% e-val:3e-12)	not assigned.unknown		0.712755	0.0269532	0.0312018	1.06206	0.194244	0.227841	0.506195	0.630608	0.322818	0.751188	0.748117	0.296377	0.740322	0.31087	0.501286	0.448963	0.53894	0.613819	2.19549	0.576948	0.589252	4.93796	0.0865183	0.0546943	X
>generic|frv2_81501|Pisum_sativum_v2_Contig4728_1	frv2_81501;Q8VYG9	Pisum_sativum_v2_Contig4728_1 PREDICTED: C2 and GRAM domain-containing protein At5g50170-like n=1 Tax=Cicer arietinum RepID=UPI00032A81BA (UniRef100_UPI00032A81BA icov:93% qcovs:84.26% e-val:0)	signalling.unspecified		0.852616	0.0106948	0.0178308	1.64413	0.588769	0.331009	0.352115	0.561202	0.305547	0.91342	0.426475	0.203872	0.75801	0.185706	0.442581	0.455475	0.373901	0.593758	1.03808	0.327453	0.560593	1.69679	0.0177683	0.0259051
>generic|frv2_74966|Pisum_sativum_v2_Contig756_6	frv2_74966;P19976	Pisum_sativum_v2_Contig756_6 PREDICTED: LOW QUALITY PROTEIN: ferritin-3, chloroplastic-like n=1 Tax=Cicer arietinum RepID=UPI00032A8D9C (UniRef100_UPI00032A8D9C icov:98% qcovs:93.46% e-val:2e-98)	metal handling.binding, chelation and storage		0.753468	0.00421356	0.0118587	1.22169	0.894411	0.396758	0.722806	0.167749	0.186669	0.912297	0.0167537	0.0282549	0.833343	0.151769	0.434084	0.469705	0.187027	0.593758	0.48524	0.962433	0.698101	0.489029	0.085409	0.0545452
>generic|frv2_85184|Pisum_sativum_v2_Contig6568_2	frv2_85184	Pisum_sativum_v2_Contig6568_2 14-3-3-like protein n=1 Tax=Pisum sativum RepID=Q9T0N0_PEA (UniRef100_Q9T0N0 icov:99% qcovs:99.62% e-val:0)	signalling.14-3-3 proteins		0.688107	0.0259943	0.0306482	1.29478	0.619073	0.33776	0.829365	0.194549	0.204517	0.862453	0.529991	0.23699	0.847776	0.423156	0.547231	0.470298	0.329414	0.593758	1.03949	0.847346	0.672875	2.9057	0.28704	0.102696	X
>generic|carvalho30238|PsCam043048_1_AA	Q93YR3;frv2_79635;frv2_53772	PsCam043048_1_AA FAM10 family protein At4g22670 OS=Arabidopsis thaliana GN=At4g22670 PE=1 SV=1 (sp	not assigned.no ontology.pentatricopeptide (PPR) repeat-containing protein		0.787389	0.0263357	0.0307189	1.31973	0.518942	0.309794	1.16978	0.525833	0.299017	0.971256	0.941766	0.34358	1.00403	0.920426	0.687193	0.473141	0.280774	0.593758	1.42785	0.997041	0.70742	1	0.0980618	0.0574017
>generic|frv2_48237|franssen_29598_3	frv2_48237;frv2_95965;frv2_95967	franssen_29598_3 Superoxide dismutase [Cu-Zn], chloroplastic n=1 Tax=Pisum sativum RepID=SODCP_PEA (UniRef100_P11964 icov:89% qcovs:99.5% e-val:1e-139)	redox.dismutases and catalases		0.713932	0.0244218	0.0302094	1.40551	0.626014	0.338541	0.687284	0.631594	0.322818	0.472643	0.660554	0.274943	0.821056	0.182334	0.442581	0.483481	0.222789	0.593758	0.390695	0.387763	0.560593	3.53539	0.057678	0.0447564
>generic|frv2_48008|franssen_29453_3	frv2_48008;P04796;frv2_84868	franssen_29453_3 Glyceraldehyde-3-phosphate dehydrogenase n=2 Tax=Medicago truncatula RepID=G7J2H2_MEDTR (UniRef100_G7J2H2 icov:96% qcovs:96.18% e-val:0)	glycolysis.cytosolic branch.glyceraldehyde 3-phosphate dehydrogenase (GAP-DH)		0.750482	0.00275657	0.0106127	0.822267	0.0880035	0.148218	1.16346	0.0915753	0.131922	1.18179	0.00513353	0.0147795	0.962471	0.718974	0.628803	0.50343	0.267074	0.593758	1.35689	0.901607	0.687564	1.96289	0.0401578	0.0380798
>generic|frv2_51805|franssen_32056_5	frv2_51805;frv2_75186	franssen_32056_5 GTP-binding protein n=1 Tax=Pisum sativum RepID=Q08153_PEA (UniRef100_Q08153 icov:74% qcovs:100% e-val:3e-147)	signalling.G-proteins		0.656363	0.00628167	0.0139714	0.811705	0.22284	0.238173	0.262335	0.918815	0.394063	0.891756	0.0669145	0.0651951	1.15649	0.492326	0.563493	0.514534	0.373901	0.593758	2.42683	0.315604	0.560593	1.91468	0.00995146	0.0196727
>generic|frv2_83124|Pisum_sativum_v2_Contig5536_3	frv2_83124	Pisum_sativum_v2_Contig5536_3 P54 protein n=1 Tax=Pisum sativum RepID=O49927_PEA (UniRef100_O49927 icov:99% qcovs:99.79% e-val:0)	development.storage proteins		0.879246	0.0347807	0.0365402	1.20297	0.29214	0.27021	1.82318	0.350782	0.262513	0.743797	0.110711	0.0873693	1.00203	0.96475	0.694655	0.52055	0.3865	0.593758	0.966394	0.475375	0.564505	1.89079	0.0140415	0.0235891	X
>generic|frv2_101951|p.sativum_wa1_contig10185_6	frv2_101951	p.sativum_wa1_contig10185_6 B-cell receptor-associated-like protein n=1 Tax=Medicago truncatula RepID=G7JEQ0_MEDTR (UniRef100_G7JEQ0 icov:96% qcovs:92.96% e-val:3e-141)	not assigned.no ontology		1.70825	0.0353651	0.0367764	1.92071	0.674888	0.34309	0.137106	0.802501	0.369689	2.11634	0.254936	0.140273	0.577058	0.244563	0.482134	0.520746	0.446679	0.602515	2.30598	0.728139	0.637403	1.44775	0.915253	0.234875	X
>generic|frv2_50780|franssen_31353_6	frv2_50780;frv2_95854;frv2_95856	franssen_31353_6 Ribosomal protein n=2 Tax=Medicago truncatula RepID=G7ITT4_MEDTR (UniRef100_G7ITT4 icov:89% qcovs:97.69% e-val:2e-150)	protein.synthesis.ribosomal protein.prokaryotic.unknown organellar.50S subunit.L10A		1.2071	0.04575	0.0435863	1.88944	0.436599	0.299484	1.15866	0.212357	0.214924	0.8713	0.109461	0.0869525	1.05878	0.804036	0.654731	0.521416	0.258543	0.593758	1.74523	0.912122	0.690752	1	0.186571	0.0782763
>generic|frv2_47982|franssen_29435_1	frv2_47982;frv2_121266;frv2_4384;frv2_89584	franssen_29435_1 Aluminum induced protein with YGL and LRDR motif protein n=1 Tax=Medicago truncatula RepID=I3T590_MEDTR (UniRef100_I3T590 icov:99% qcovs:96.48% e-val:9e-161)	metal handling		0.756731	0.0282244	0.0321875	1.30906	0.206718	0.231123	1.31602	0.160439	0.185744	2.5051	0.217179	0.125487	0.865285	0.064108	0.343571	0.528639	0.24848	0.593758	1.97146	0.671832	0.615149	1.92868	0.154564	0.0713967
>generic|frv2_48244|franssen_29605_1	frv2_48244;frv2_80274	franssen_29605_1 UDP-D-apiose/UDP-D-xylose synthase n=1 Tax=Medicago truncatula RepID=A0A072ULI6_MEDTR (UniRef100_A0A072ULI6 icov:92% qcovs:97.44% e-val:0)	cell wall.precursor synthesis.AXS		0.665413	0.0164128	0.0234186	0.84518	0.447766	0.302599	0.797718	0.227447	0.221169	0.816107	0.642426	0.269842	1.20014	0.29588	0.496739	0.535165	0.507538	0.606728	1.35205	0.450152	0.563171	0.967689	0.816181	0.21886
>generic|carvalho35841|PsCam051097_1_AA	O23016;frv2_83731;frv2_49276	PsCam051097_1_AA Probable voltage-gated potassium channel subunit beta OS=Arabidopsis thaliana GN=KAB1 PE=1 SV=1 (sp	transport.potassium		0.751387	0.0130098	0.019856	0.713228	0.323717	0.278118	0.769916	0.363193	0.262513	0.859559	0.0300605	0.0387103	0.978799	0.835869	0.665712	0.54312	0.251255	0.593758	1.43898	0.138947	0.482694	1.84816	0.0365349	0.0362661
>generic|frv2_85599|Pisum_sativum_v2_Contig6776_2	frv2_85599;frv2_54672	Pisum_sativum_v2_Contig6776_2 Anamorsin homolog n=2 Tax=Medicago truncatula RepID=DRE2_MEDTR (UniRef100_B7FNA9 icov:90% qcovs:92.83% e-val:3e-172)	not assigned.unknown		1.48689	0.00518841	0.0125328	1.6391	0.688423	0.344163	2.81399	0.909569	0.393095	0.778914	0.48006	0.221828	1.56411	0.113333	0.391612	0.545537	0.384942	0.593758	1.23905	0.348636	0.560593	1.78162	0.141489	0.0690919
>generic|frv2_114003|p.sativum_wa1_contig20704_4	frv2_114003;frv2_23052	p.sativum_wa1_contig20704_4 Beta-galactosidase n=1 Tax=Glycine max RepID=I1LL69_SOYBN (UniRef100_I1LL69 icov:96% qcovs:83.86% e-val:0)	misc.gluco-, galacto- and mannosidases.beta-galactosidase		0.502552	0.00825778	0.0150039	1.7305	0.607782	0.336209	0.680796	0.129306	0.161357	0.934652	0.965055	0.348509	1.16019	0.27498	0.492005	0.566851	0.2945	0.593758	1.59433	0.935971	0.692776	2.52418	0.12096	0.0630694
>generic|frv2_117494|p.sativum_wa1_contig23484_5	frv2_117494;frv2_90121	p.sativum_wa1_contig23484_5 N-carbamoylputrescine amidohydrolase, putative n=1 Tax=Medicago truncatula RepID=G7ITU5_MEDTR (UniRef100_G7ITU5 icov:93% qcovs:95.3% e-val:0)	polyamine metabolism.synthesis.N-carbamoylputrescine amidohydrolase		0.571335	0.00694416	0.0141549	1.46285	0.576747	0.328922	1.41648	0.0342211	0.0697808	0.656127	0.349574	0.178132	1.04708	0.834933	0.665712	0.569635	0.117353	0.593758	1.04039	0.717056	0.631462	1.8969	0.187647	0.0784455
>generic|carvalho35953|PsCam051244_1_AA	P93798;frv2_55078;frv2_102312	PsCam051244_1_AA Alpha-soluble NSF attachment protein OS=Vitis vinifera PE=2 SV=1 (sp	protein.targeting.secretory pathway.unspecified		1.68973	0.0101361	0.0172748	0.868486	0.696072	0.344163	1.84166	0.563692	0.305625	1.20396	0.020506	0.0321362	1.04434	0.402348	0.544022	0.570889	0.375618	0.593758	0.89881	0.929179	0.692593	4.02147	0.0532219	0.0434095
>generic|frv2_43449|franssen_26640_3	frv2_43449	franssen_26640_3 14-3-3-like protein n=1 Tax=Pisum sativum RepID=Q9XG89_PEA (UniRef100_Q9XG89 icov:89% qcovs:100% e-val:0)	signalling.14-3-3 proteins		0.719346	0.0425668	0.0417075	1.18949	0.421431	0.298912	54.4718	0.869217	0.384356	1.69754	0.827507	0.315896	1.0317	0.753487	0.638239	0.580888	0.354633	0.593758	1.83443	0.970891	0.698429	144.965	0.204709	0.0830481	X
>generic|carvalho30715|PsCam044071_1_AA	Q9SF16;frv2_68928;frv2_77493	PsCam044071_1_AA T-complex protein 1 subunit eta OS=Arabidopsis thaliana GN=CCT7 PE=1 SV=1 (sp	protein.folding		0.628833	0.0070746	0.0141549	1.14953	0.128561	0.185706	0.325657	0.0528842	0.0680352	0.66522	0.00481531	0.0145439	1.34121	0.0957061	0.378925	0.582792	0.118389	0.593758	2.01477	0.384795	0.560593	2.73239	0.0515684	0.0427162
>generic|carvalho29750|PsCam042365_1_AA	Q8LPT9	PsCam042365_1_AA Alpha-glucan water dikinase, chloroplastic OS=Citrus reticulata GN=R1 PE=2 SV=1 (sp	major CHO metabolism.degradation.starch.glucan water dikinase		1.52071	0.0116581	0.0189227	0.946249	0.944342	0.408937	0.486258	0.414533	0.275358	0.512801	0.665302	0.275953	1.07056	0.484505	0.563493	0.583436	0.516148	0.60777	0.275988	0.503175	0.569931	0.923274	0.749214	0.204888	X
>generic|frv2_49948|franssen_30767_3	frv2_49948;frv2_113272	franssen_30767_3 PREDICTED: probable fructose-bisphosphate aldolase 3, chloroplastic-like n=1 Tax=Cicer arietinum RepID=UPI00032A5234 (UniRef100_UPI00032A5234 icov:94% qcovs:94.87% e-val:0)	PS.calvin cycle.aldolase		0.685073	0.0209854	0.0279902	1.62071	0.296068	0.27021	0.956341	0.0452107	0.0856398	1.0273	0.872363	0.326388	1.06473	0.63108	0.612395	0.589191	0.224419	0.593758	1.48084	0.473878	0.564505	1.54733	0.182686	0.0776233
>generic|frv2_83330|Pisum_sativum_v2_Contig5639_3	frv2_83330;frv2_50283;Q9MAH3	Pisum_sativum_v2_Contig5639_3 Class I glutamine amidotransferase superfamily protein n=2 Tax=Medicago truncatula RepID=A0A072V987_MEDTR (UniRef100_A0A072V987 icov:98% qcovs:90.23% e-val:0)	not assigned.no ontology		0.721811	0.00392231	0.01155	0.759742	0.970154	0.415562	0.660185	0.677904	0.337893	1.1121	0.421739	0.202482	1.05083	0.526389	0.577766	0.602844	0.349416	0.593758	1.58191	0.0428872	0.317468	1.9468	0.0466465	0.0413736
>generic|frv2_117125|p.sativum_wa1_contig23177_6	frv2_117125;frv2_49937;Q9SCL7	p.sativum_wa1_contig23177_6 N-acetylglutamate kinase n=2 Tax=Medicago truncatula RepID=G7JCA9_MEDTR (UniRef100_G7JCA9 icov:92% qcovs:86.59% e-val:0)	nucleotide metabolism.phosphotransfer and pyrophosphatases.misc		0.896435	0.0373935	0.0382376	1.27973	0.0586779	0.117221	0.363261	0.0567427	0.0861916	0.879459	0.841853	0.317836	0.945213	0.811831	0.657798	0.607792	0.495231	0.606728	1.08029	0.959042	0.698101	1.73075	0.372958	0.123347
>generic|frv2_74052|Pisum_sativum_v2_Contig176_4	frv2_74052	Pisum_sativum_v2_Contig176_4 LegA class n=1 Tax=Pisum sativum RepID=Q9T0P5_PEA (UniRef100_Q9T0P5 icov:91% qcovs:98.46% e-val:0)	development.storage proteins		0.826088	0.0236586	0.029745	1.70064	0.748744	0.359939	1.10767	0.60533	0.316463	0.992586	0.000629559	0.00677551	0.932377	0.437951	0.553218	0.616391	0.410301	0.599086	0.594749	0.178655	0.499043	1.0842	0.0282291	0.0312086	X
>generic|frv2_88467|Pisum_sativum_v2_Contig8208_3	frv2_88467	Pisum_sativum_v2_Contig8208_3 Plastid OEP16.2 n=1 Tax=Pisum sativum RepID=G9JKP3_PEA (UniRef100_G9JKP3 icov:84% qcovs:99.45% e-val:9e-128)	protein.targeting.mitochondria		1.59851	0.00365761	0.0113657	1.0443	0.159164	0.206544	0.868393	0.0102949	0.0330935	1.19083	0.486652	0.223939	0.837842	0.0652115	0.346243	0.630624	0.29631	0.593758	0.957511	0.31765	0.560593	1.34581	0.283831	0.102175	X
>generic|frv2_102683|p.sativum_wa1_contig10884_6	frv2_102683;frv2_102685	p.sativum_wa1_contig10884_6 Monodehydroascorbate reductase n=2 Tax=Medicago truncatula RepID=A0A072TUC0_MEDTR (UniRef100_A0A072TUC0 icov:99% qcovs:91.5% e-val:0)	redox.ascorbate and glutathione.ascorbate		1.78737	0.00361685	0.0113657	1.30909	0.401294	0.295706	0.46861	0.607838	0.317348	1.16575	0.0689097	0.0659782	1.04165	0.667549	0.617141	0.635125	0.426067	0.600818	1.11116	0.584806	0.591504	1.8251	0.237961	0.0914452
>generic|carvalho40781|PsCam058422_1_AA	P52780;frv2_77114	PsCam058422_1_AA Glutamine--tRNA ligase OS=Lupinus luteus PE=2 SV=2 (sp	protein.aa activation.glutamine-tRNA ligase		1.47038	0.00361842	0.0113657	0.563298	0.413295	0.298912	0.412887	0.363149	0.262513	1.49471	0.00270678	0.0113362	1.09032	0.679757	0.617429	0.6404	0.121587	0.593758	2.48296	0.26638	0.560593	1.72942	0.00025721	0.00250618
>generic|frv2_77045|Pisum_sativum_v2_Contig2240_6	frv2_77045	Pisum_sativum_v2_Contig2240_6 UDP-glucosyltransferase family protein n=1 Tax=Medicago truncatula RepID=G7KU63_MEDTR (UniRef100_G7KU63 icov:96% qcovs:80.08% e-val:0)	secondary metabolism.flavonoids.flavonols.flavonol 3-O-glycosyltransferase		0.524068	0.00169349	0.00895714	1.19087	0.46665	0.302738	0.861201	0.901713	0.391003	0.99446	0.00712943	0.0183461	0.936908	0.676349	0.617429	0.64051	0.59469	0.62084	1.53631	0.0304666	0.295844	1.82333	0.0050124	0.0132869	X
>generic|frv2_75305|Pisum_sativum_v2_Contig1009_6	frv2_75305;frv2_75310	Pisum_sativum_v2_Contig1009_6 PREDICTED: putative lactoylglutathione lyase-like isoform X1 n=1 Tax=Glycine max RepID=UPI00023388FE (UniRef100_UPI00023388FE icov:99% qcovs:80.82% e-val:1e-174)	Biodegradation of Xenobiotics.lactoylglutathione lyase		0.721313	0.0234622	0.0297066	1.20796	0.226714	0.238648	1.88883	0.548159	0.304588	0.851573	0.320015	0.166713	1.09952	0.218104	0.472112	0.650047	0.513403	0.60777	1.75616	0.242177	0.549017	3.57388	0.0601738	0.0455739
>generic|frv2_47087|franssen_28864_4	frv2_47087;frv2_86518	franssen_28864_4 Vf14-3-3c protein n=1 Tax=Vicia faba RepID=Q9FXL2_VICFA (UniRef100_Q9FXL2 icov:95% qcovs:95.83% e-val:0)	signalling.14-3-3 proteins		0.51367	0.000598075	0.0071567	1.37783	0.193127	0.227841	1.06105	0.0744753	0.118009	0.625239	0.166418	0.108068	1.15615	0.428224	0.549433	0.654608	0.587119	0.62084	0.602361	0.952371	0.698101	0.893041	0.286461	0.102696
>generic|frv2_82090|Pisum_sativum_v2_Contig5021_3	frv2_82090	Pisum_sativum_v2_Contig5021_3 PREDICTED: tubulin beta-3 chain-like n=1 Tax=Cicer arietinum RepID=UPI00032A4FA5 (UniRef100_UPI00032A4FA5 icov:96% qcovs:98.65% e-val:0)	cell.organisation.cytoskeleton.mikrotubuli		0.694526	0.000285264	0.00486172	1.30416	0.96178	0.414217	0.572663	0.46831	0.284171	0.649509	0.0403171	0.0474996	1.11026	0.601348	0.605821	0.656193	0.542858	0.617218	0.933739	0.924074	0.691797	1.96367	0.374944	0.123347	X
>generic|frv2_79240|Pisum_sativum_v2_Contig3550_2	frv2_79240	Pisum_sativum_v2_Contig3550_2 PREDICTED: xylose isomerase-like isoform X3 n=1 Tax=Cicer arietinum RepID=UPI00032AC7D5 (UniRef100_UPI00032AC7D5 icov:91% qcovs:93.53% e-val:0)	minor CHO metabolism.others.Xylose isomerase		0.737527	0.00105643	0.00796634	1.26974	0.432846	0.298983	1.14841	0.69301	0.342072	0.775676	0.00504286	0.0147795	0.939955	0.339352	0.514612	0.657569	0.259428	0.593758	0.466051	0.174558	0.499043	0.344067	0.013528	0.0232192	X
>generic|frv2_115257|p.sativum_wa1_contig21762_5	frv2_115257;Q9S9N9;frv2_1722;Q500U8	p.sativum_wa1_contig21762_5 Cinnamyl alcohol dehydrogenase n=1 Tax=Medicago truncatula RepID=G7LEN2_MEDTR (UniRef100_G7LEN2 icov:98% qcovs:84.92% e-val:0)	misc.alcohol dehydrogenases.cinnamyl alcohol dehydrogenase		0.751426	0.0426902	0.0417075	0.935239	0.415803	0.298912	0.562197	0.574977	0.308048	0.750922	0.134068	0.0972541	1.00324	0.978565	0.697188	0.659249	0.622115	0.624557	1.06314	0.0526009	0.337934	1.58356	0.0512731	0.0427161
>generic|frv2_88213|Pisum_sativum_v2_Contig8081_4	frv2_88213	Pisum_sativum_v2_Contig8081_4 Gossypium raimondii chromosome 8, whole genome shotgun sequence n=1 Tax=Gossypium raimondii RepID=A0A0D2R8B8_GOSRA (UniRef100_A0A0D2R8B8 icov:100% qcovs:82.64% e-val:1e-66)	protein.synthesis.ribosomal protein.eukaryotic.40S subunit.S25		1.19088	0.00764926	0.0146686	1.4072	0.46795	0.302738	0.771372	0.114398	0.151767	1.12461	0.0398303	0.0470931	1.08298	0.744219	0.638239	0.672094	0.51912	0.608018	0.536112	0.97242	0.698429	0.801304	0.403228	0.129578	X
>generic|frv2_80254|Pisum_sativum_v2_Contig4092_3	frv2_80254;frv2_42312	Pisum_sativum_v2_Contig4092_3 26S proteasome non-ATPase regulatory subunit-like protein n=3 Tax=Medicago truncatula RepID=G7J2W0_MEDTR (UniRef100_G7J2W0 icov:89% qcovs:96.46% e-val:0)	protein.degradation.ubiquitin.proteasom		0.663872	0.015673	0.0226794	1.49198	0.206609	0.231123	1.04803	0.165084	0.185744	1.54201	0.0687716	0.0659782	0.947791	0.58511	0.599739	0.680419	0.469519	0.602515	3.38163	0.0921256	0.415986	4.54797	0.165162	0.0738299
>generic|frv2_52527|franssen_32549_2	frv2_52527;frv2_74421	franssen_32549_2 Ferritin-1, chloroplastic n=1 Tax=Pisum sativum RepID=FRI1_PEA (UniRef100_P19975 icov:95% qcovs:98.02% e-val:0)	metal handling.binding, chelation and storage		0.713998	0.0261241	0.0306482	1.38534	0.982543	0.419114	0.610985	0.581886	0.309617	0.580203	0.950006	0.345236	0.867894	0.0723164	0.366727	0.68137	0.37103	0.593758	0.445278	0.920433	0.691797	0.718004	0.11343	0.0613875
>generic|carvalho35345|PsCam050471_1_AA	O50044	PsCam050471_1_AA 2-dehydro-3-deoxyphosphooctonate aldolase OS=Pisum sativum GN=KDSA PE=2 SV=1 (sp	cell wall.precursor synthesis.KDO pathway.KDO-8-Phosphate Synthase		0.784305	0.00406461	0.01155	1.35544	0.419035	0.298912	0.384587	0.378133	0.263026	0.967897	0.0516446	0.056073	0.990225	0.918045	0.687193	0.684932	0.590629	0.62084	1.82217	0.188426	0.508929	1.67531	0.0372937	0.036746	X
>generic|carvalho12193|PsCam010939_1_AA	Q0WNJ6	PsCam010939_1_AA Clathrin heavy chain 1 OS=Arabidopsis thaliana GN=CHC1 PE=1 SV=1 (sp	cell.vesicle transport		0.64829	0.0376026	0.0383236	1.30035	0.187706	0.223773	0.460914	0.267005	0.238611	1.39289	0.00401347	0.0133343	0.979824	0.834981	0.665712	0.686706	0.685688	0.633374	0.869874	0.642208	0.606723	3.49573	0.889262	0.229976	X
>generic|carvalho23917|PsCam034119_1_AA	A2Z3C4;frv2_101292;frv2_48755	PsCam034119_1_AA Probable 6-phosphogluconolactonase 4, chloroplastic OS=Oryza sativa subsp. indica GN=OsI_031067 PE=3 SV=2 (sp	OPP.oxidative PP.6-phosphogluconolactonase		1.30375	0.0381795	0.0384013	0.785743	0.41952	0.298912	0.658438	0.506098	0.294718	1.27321	0.022151	0.0334519	0.935961	0.650621	0.613885	0.688985	0.259089	0.593758	1.82616	0.742045	0.637738	3.5606	0.429285	0.13569
>generic|carvalho35434|PsCam050574_1_AA	O04331;frv2_84900;frv2_49644	PsCam050574_1_AA Prohibitin-3, mitochondrial OS=Arabidopsis thaliana GN=PHB3 PE=1 SV=1 (sp	cell.division		1.2522	0.00673322	0.0141549	1.21925	0.11119	0.170574	0.522232	0.111658	0.150527	0.960709	0.145899	0.100388	1.04321	0.456607	0.556725	0.697603	0.455421	0.602515	0.621007	0.245707	0.552469	1.01032	0.00404599	0.0116447
>generic|frv2_97451|p.sativum_wa1_contig05501_6	frv2_97451;frv2_76266;frv2_97455;frv2_97453;frv2_4551;frv2_34331;frv2_41423;frv2_48118	p.sativum_wa1_contig05501_6 PREDICTED: 26S proteasome non-ATPase regulatory subunit 14-like n=2 Tax=Cicer arietinum RepID=UPI00032A63CB (UniRef100_UPI00032A63CB icov:98% qcovs:99.68% e-val:0)	protein.degradation.ubiquitin.proteasom		0.837422	0.0096756	0.0168857	1.58214	0.538306	0.317522	0.599234	0.162774	0.185744	68.5574	0.410819	0.198675	1.27164	0.107282	0.384961	0.711007	0.52942	0.613588	3.71028	0.636199	0.606723	2.53957	0.0615288	0.0462995
>generic|frv2_111907|p.sativum_wa1_contig18819_6	frv2_111907;frv2_47611;frv2_47610;Q9SZN1	p.sativum_wa1_contig18819_6 Archaeal/vacuolar-type H+-ATPase subunit B n=2 Tax=Papilionoideae RepID=A0A072VSL4_MEDTR (UniRef100_A0A072VSL4 icov:98% qcovs:99.18% e-val:0)	transport.p- and v-ATPases.H+-transporting two-sector ATPase.subunit B		1.2276	0.0023765	0.0099869	0.669672	0.258794	0.253688	0.894534	0.18887	0.200171	0.89666	0.00282434	0.0113362	1.21652	0.0915111	0.373521	0.71201	0.440306	0.602515	0.81115	0.069473	0.38153	1.4345	0.0855068	0.0545452
>generic|frv2_121560|p.sativum_wa1_contig26483_6	frv2_121560	p.sativum_wa1_contig26483_6 ATP-dependent chaperone ClpB n=1 Tax=Medicago truncatula RepID=A0A072USG1_MEDTR (UniRef100_A0A072USG1 icov:100% qcovs:98.29% e-val:0)	stress.abiotic.heat		0.750734	0.00184811	0.00914431	0.611196	0.431666	0.298912	0.977418	0.818103	0.372648	0.941375	0.781581	0.305495	1.06157	0.610704	0.609839	0.720881	0.648679	0.627901	1.19355	0.401522	0.560593	1.57566	0.0875	0.0549526	X
>generic|frv2_126390|p.sativum_wa1_contig29645_3	frv2_126390	p.sativum_wa1_contig29645_3 Heat shock 70 kDa protein n=1 Tax=Medicago truncatula RepID=A0A072UGG8_MEDTR (UniRef100_A0A072UGG8 icov:99% qcovs:94.34% e-val:2e-139)	stress.abiotic.heat		1.94339	0.00946809	0.0167893	1.19219	0.496913	0.306346	0.705985	0.845538	0.380852	0.688707	0.829302	0.31597	1.04296	0.846962	0.668029	0.74577	0.74983	0.663667	1.68753	0.771772	0.646578	1.2976	0.815926	0.21886	X
>generic|frv2_82020|Pisum_sativum_v2_Contig4986_2	frv2_82020;frv2_47977;Q9LEU8	Pisum_sativum_v2_Contig4986_2 Argininosuccinate lyase n=2 Tax=Medicago truncatula RepID=G7J530_MEDTR (UniRef100_G7J530 icov:92% qcovs:88.84% e-val:0)	amino acid metabolism.synthesis.glutamate family.arginine.argininosuccinate lyase		0.845721	0.0126038	0.0196205	0.949481	0.427614	0.298912	3.30421	0.57014	0.306724	1.02247	0.000291697	0.00505252	0.925094	0.519842	0.574441	0.759143	0.173721	0.593758	1.47119	0.710381	0.630488	2.16337	0.401377	0.129501
>generic|frv2_77969|Pisum_sativum_v2_Contig2785_6	frv2_77969;frv2_49713;Q94JQ4	Pisum_sativum_v2_Contig2785_6 Perchloric acid soluble translation inhibitor-like protein n=1 Tax=Medicago truncatula RepID=I3SK73_MEDTR (UniRef100_I3SK73 icov:98% qcovs:86.17% e-val:2e-112)	RNA.processing.ribonucleases		1.17922	0.0099463	0.0171418	1.01141	0.247871	0.249357	1.12992	0.120061	0.155663	0.903742	0.237636	0.1345	0.74149	0.0902256	0.373433	0.76896	0.230777	0.593758	0.54995	0.76279	0.643607	0.409242	0.841503	0.222056
>generic|frv2_49202|franssen_30253_3	frv2_49202;Q9C7F5	franssen_30253_3 Nuclear transport factor 2 n=1 Tax=Medicago truncatula RepID=A0A072TT57_MEDTR (UniRef100_A0A072TT57 icov:93% qcovs:92.68% e-val:2e-79)	protein.targeting.nucleus		0.713497	0.00313411	0.0107414	1.18446	0.644079	0.338541	0.101205	0.364848	0.262513	1.98886	0.000382255	0.00552173	1.16567	0.381036	0.528331	0.775433	0.607986	0.621285	2.01647	0.48854	0.567228	4.7371	0.126447	0.0641227
>generic|frv2_120472|p.sativum_wa1_contig25727_6	frv2_120472;O82531	p.sativum_wa1_contig25727_6 Proteasome subunit beta type n=2 Tax=Medicago truncatula RepID=G7KBP9_MEDTR (UniRef100_G7KBP9 icov:94% qcovs:96.41% e-val:2e-161)	protein.degradation.ubiquitin.proteasom		1.37213	0.0247811	0.0305307	1.8681	0.14374	0.195896	1.02354	0.86624	0.383749	0.716983	0.16654	0.108068	1.07395	0.657283	0.613885	0.776494	0.533771	0.613588	2.9491	0.720958	0.633194	7.0407	0.210362	0.0840262
>generic|frv2_47374|franssen_29044_3	frv2_47374	franssen_29044_3 Phosphoglycerate kinase n=1 Tax=Pisum sativum RepID=Q9LKJ2_PEA (UniRef100_Q9LKJ2 icov:95% qcovs:100% e-val:0)	PS.calvin cycle.phosphoglycerate kinase		0.799238	0.00121657	0.00796634	0.916418	0.367675	0.286797	2.52106	0.554073	0.305245	1.58207	0.0748629	0.068708	0.905654	0.458628	0.556725	0.782118	0.204537	0.593758	2.21941	0.352524	0.560593	5.93398	0.14943	0.0705619	X
>generic|carvalho35603|PsCam050787_1_AA	O24305;frv2_48160;frv2_85081	PsCam050787_1_AA (+)-6a-hydroxymaackiain 3-O-methyltransferase 1 OS=Pisum sativum GN=HMM1 PE=1 SV=1 (sp	secondary metabolism.phenylpropanoids		1.69466	0.00666107	0.0141549	0.577146	0.399108	0.295081	0.683206	0.016052	0.0424734	0.98329	0.0160323	0.0280345	0.910286	0.499235	0.566036	0.782387	0.656337	0.627901	1.35627	0.0842884	0.408523	1.70734	0.00826074	0.0176522
>generic|frv2_50777|franssen_31352_2	frv2_50777;frv2_82233;Q9SH69	franssen_31352_2 6-phosphogluconate dehydrogenase, decarboxylating n=1 Tax=Medicago truncatula RepID=A0A072TUR1_MEDTR (UniRef100_A0A072TUR1 icov:97% qcovs:95.91% e-val:0)	OPP.oxidative PP.6-phosphogluconate dehydrogenase		0.777179	0.0461089	0.0437924	1.93162	0.11311	0.172185	0.915412	0.0465001	0.0861916	0.789113	0.415102	0.200433	1.22737	0.176238	0.442581	0.791862	0.734632	0.659356	1.27707	0.765275	0.643607	1.80406	0.283585	0.102175
>generic|frv2_81916|Pisum_sativum_v2_Contig4934_3	frv2_81916;frv2_50296	Pisum_sativum_v2_Contig4934_3 Purple acid phosphatase n=1 Tax=Medicago truncatula RepID=A0A072U2E8_MEDTR (UniRef100_A0A072U2E8 icov:99% qcovs:93.14% e-val:0)	misc.acid and other phosphatases		1.38848	0.017248	0.0241607	1.08208	0.707081	0.348081	0.337842	0.588248	0.311723	0.83295	0.0244432	0.034705	0.844602	0.339622	0.514612	0.801234	0.535202	0.613588	0.466633	0.903932	0.688353	1.15409	0.818366	0.218923
>generic|frv2_74833|Pisum_sativum_v2_Contig657_4	frv2_74833;frv2_47310;P49205	Pisum_sativum_v2_Contig657_4 Uncharacterized protein n=2 Tax=Soja RepID=I1L9G9_SOYBN (UniRef100_I1L9G9 icov:75% qcovs:92.65% e-val:1e-84)	protein.synthesis.ribosomal protein.eukaryotic.40S subunit.S17		1.42824	0.0216518	0.02863	0.817385	0.0851569	0.145844	0.68244	0.00745648	0.0268852	0.727143	0.599159	0.259008	0.902703	0.608786	0.609788	0.813411	0.693011	0.635822	0.649221	0.952124	0.698101	1.14321	0.145333	0.0700726
>generic|carvalho30253|PsCam043080_1_AA	Q9ZPH2;frv2_82176	PsCam043080_1_AA Monothiol glutaredoxin-S17 OS=Arabidopsis thaliana GN=GRXS17 PE=1 SV=1 (sp	redox.thioredoxin		1.36141	0.00283642	0.0106127	0.628312	0.18008	0.220351	1.3502	0.81669	0.372648	1.01435	0.00144348	0.0097873	1.0398	0.795369	0.65176	0.820678	0.608221	0.621285	1.40092	0.141641	0.482694	0.561501	0.393562	0.128151
>generic|frv2_111200|p.sativum_wa1_contig18134_5	frv2_111200	p.sativum_wa1_contig18134_5 Heat shock 70 kDa protein, mitochondrial n=1 Tax=Pisum sativum RepID=HSP7M_PEA (UniRef100_P37900 icov:97% qcovs:99.7% e-val:0)	stress.abiotic.heat		1.2	0.0493431	0.0461497	1.29073	0.587127	0.330555	2.00641	0.945426	0.401487	1.90448	0.00769916	0.0188515	1.10567	0.240757	0.482083	0.83608	0.435565	0.602515	1.11354	0.822269	0.665864	1.34388	0.107888	0.0596759	X
>generic|mut47|p.sativum_wa1_contig30154_m	mut47;frv2_127202;frv2_47096	p.sativum_wa1_contig30154_m SOUL heme-binding family protein [Medicago truncatula] (G7JRA5, ident:90.6%, e-val:10E-126)	not assigned.no ontology		1.8436	0.00184642	0.00914431	1.09058	0.215919	0.235424	1.42866	0.012645	0.0375691	0.843283	0.391302	0.192601	0.915668	0.199777	0.450884	0.864816	0.775861	0.670839	0.95522	0.848382	0.672875	0.765126	0.19019	0.0790834
>generic|frv2_80755|Pisum_sativum_v2_Contig4356_1	frv2_80755	Pisum_sativum_v2_Contig4356_1 Alpha-1,4 glucan phosphorylase L isozyme, chloroplastic/amyloplastic n=1 Tax=Vicia faba RepID=PHSL_VICFA (UniRef100_P53536 icov:99% qcovs:93.52% e-val:0)	major CHO metabolism.degradation.starch.starch phosphorylase		0.828603	0.00295391	0.0107414	1.20097	0.750305	0.359939	1.94741	0.593178	0.313263	1.06509	0.152358	0.102884	0.982356	0.842743	0.666991	0.870746	0.267362	0.593758	1.80687	0.130991	0.48015	1.26945	0.225974	0.0882967	X
>generic|frv2_97597|p.sativum_wa1_contig05713_2	frv2_97597;Q9ZT91	p.sativum_wa1_contig05713_2 Elongation factor Tu n=1 Tax=Medicago truncatula RepID=A0A072U201_MEDTR (UniRef100_A0A072U201 icov:97% qcovs:92.97% e-val:0)	protein.synthesis.elongation		0.872014	0.018463	0.0252854	1.21378	0.993279	0.421131	0.566317	0.865109	0.383686	0.677237	0.947054	0.344778	1.09711	0.442719	0.554755	0.888995	0.870058	0.701478	1.54114	0.376414	0.560593	0.360026	0.179707	0.0770535
>generic|carvalho34174|PsCam049095_1_AA	Q9SM59	PsCam049095_1_AA Phosphoglucomutase, chloroplastic OS=Pisum sativum GN=PGMP PE=2 SV=1 (sp	glycolysis.plastid branch.phosphoglucomutase (PGM)		0.534632	0.000919564	0.00789628	1.90914	0.610334	0.336442	0.273861	0.0913227	0.131922	0.906124	0.15175	0.102683	0.919522	0.433941	0.552428	0.896511	0.889133	0.709344	2.13122	0.223172	0.544114	2.58177	0.375429	0.123347	X
>generic|frv2_114638|p.sativum_wa1_contig21228_4	frv2_114638;Q55512	p.sativum_wa1_contig21228_4 PREDICTED: aspartate-semialdehyde dehydrogenase-like n=1 Tax=Cicer arietinum RepID=UPI00032A687A (UniRef100_UPI00032A687A icov:99% qcovs:92.04% e-val:0)	amino acid metabolism.synthesis.aspartate family.misc.homoserine.aspartate semialdehyde dehydrogenase		0.607593	0.00970775	0.0168857	0.847662	0.316197	0.274241	0.458032	0.85145	0.381983	1.3272	0.748439	0.296377	0.841046	0.174861	0.442581	0.910055	0.90429	0.712839	1.04509	0.0151357	0.206321	1.55708	0.0127397	0.0223444
>generic|frv2_81331|Pisum_sativum_v2_Contig4643_1	frv2_81331;Q9LIR4	Pisum_sativum_v2_Contig4643_1 PREDICTED: dihydroxy-acid dehydratase-like n=1 Tax=Cicer arietinum RepID=UPI00032ACC32 (UniRef100_UPI00032ACC32 icov:95% qcovs:92.68% e-val:0)	not assigned.no ontology		1.24325	0.0120814	0.0192034	1.83016	0.584665	0.329902	0.521948	0.602759	0.315717	1.0587	0.0418457	0.0489533	0.72253	0.157571	0.436039	0.920287	0.757791	0.663667	1.09765	0.404672	0.560593	1.75815	0.880823	0.229009
>generic|carvalho30248|PsCam043069_1_AA	Q67UF5	PsCam043069_1_AA Protein disulfide isomerase-like 2-3 OS=Oryza sativa subsp. japonica GN=PDIL2-3 PE=2 SV=1 (sp	redox.thioredoxin.PDIL		1.37375	0.0117527	0.0189757	0.98963	0.141663	0.194684	0.943308	0.710735	0.345559	1.70046	0.566507	0.250286	0.952572	0.545139	0.57983	0.920408	0.676563	0.631847	0.432952	0.11937	0.460388	1.48948	0.0226554	0.0284131	X
>generic|frv2_52365|franssen_32441_4	frv2_52365	franssen_32441_4 T-complex protein 1 subunit gamma n=5 Tax=Medicago truncatula RepID=G7IPS8_MEDTR (UniRef100_G7IPS8 icov:91% qcovs:96.22% e-val:0)	protein.folding		0.825641	0.0338006	0.0361292	0.697623	0.903527	0.397376	1.55474	0.328388	0.256485	1.08043	0.388637	0.191848	0.944098	0.679686	0.617429	0.931508	0.804387	0.676259	1.31282	0.47827	0.564873	2.61343	0.345954	0.116284	X
>generic|frv2_75632|Pisum_sativum_v2_Contig1288_5	frv2_75632;Q8GTE3;frv2_2055;frv2_46456	Pisum_sativum_v2_Contig1288_5 40S ribosomal protein S3a n=1 Tax=Medicago truncatula RepID=G7K3P1_MEDTR (UniRef100_G7K3P1 icov:92% qcovs:96.93% e-val:0)	protein.synthesis.ribosomal protein.eukaryotic.40S subunit.S3A		0.657535	0.0135621	0.020505	1.59576	0.152085	0.19866	0.375139	0.0557926	0.0533542	0.523236	0.104327	0.0841296	1.21593	0.179305	0.442581	0.932152	0.919298	0.714859	0.734016	0.0841731	0.408523	1.64007	0.102214	0.0585373
>generic|frv2_107490|p.sativum_wa1_contig14821_5	frv2_107490	p.sativum_wa1_contig14821_5 Emp24/gp25L/p24 family protein n=1 Tax=Medicago truncatula RepID=I3T547_MEDTR (UniRef100_I3T547 icov:83% qcovs:87.96% e-val:5e-132)	transport.misc		0.800513	0.0193209	0.0263427	1.38811	0.243218	0.249357	0.932492	0.16945	0.186711	0.742619	0.654272	0.273771	0.877357	0.37752	0.527761	0.93294	0.914276	0.714859	0.862419	0.119659	0.460388	3.14145	0.262824	0.0971619	X
>generic|frv2_77477|Pisum_sativum_v2_Contig2494_6	frv2_77477;frv2_77475;P15170	Pisum_sativum_v2_Contig2494_6 GTP-binding elongation factor Tu family protein n=1 Tax=Medicago truncatula RepID=G7LD89_MEDTR (UniRef100_G7LD89 icov:95% qcovs:93.4% e-val:0)	signalling.G-proteins		1.8332	0.00267117	0.0106127	1.5819	0.624884	0.338541	0.246653	0.742395	0.351722	1.34875	0.00194886	0.0111345	0.80786	0.214623	0.471934	0.937411	0.927322	0.715624	0.759698	0.386332	0.560593	1.53438	0.550018	0.164281
>generic|frv2_80352|Pisum_sativum_v2_Contig4144_4	frv2_80352	Pisum_sativum_v2_Contig4144_4 5,10-methylenetetrahydrofolate dehydrogenase-5,10-methenyltetrahydrofolate cyclohydrolase n=1 Tax=Pisum sativum RepID=Q9ZTV0_PEA (UniRef100_Q9ZTV0 icov:96% qcovs:100% e-val:0)	C1-metabolism.Methylenetetrahydrofolate dehydrogenase & Methenyltetrahydrofolate cyclohydrolase		1.49829	0.00704226	0.0141549	0.911626	0.82331	0.377034	2.00373	0.916497	0.393901	0.873692	0.0266021	0.0363713	1.23707	0.176188	0.442581	0.941341	0.945216	0.72061	1.36757	0.664826	0.612619	2.85085	0.8251	0.219533	X
>generic|frv2_120276|p.sativum_wa1_contig25598_4	frv2_120276	p.sativum_wa1_contig25598_4 4-hydroxy-tetrahydrodipicolinate synthase n=1 Tax=Medicago truncatula RepID=A0A072TQB4_MEDTR (UniRef100_A0A072TQB4 icov:88% qcovs:90.21% e-val:0)	amino acid metabolism.synthesis.aspartate family.lysine.dihydrodipicolinate synthase		1.7808	0.021584	0.02863	1.11049	0.666186	0.34243	0.524128	0.762379	0.358091	0.831369	0.0848874	0.0738294	0.621372	0.391425	0.534789	1	nan	nan	1.57811	0.159252	0.48784	2.6957	0.118871	0.0623912	X
>generic|frv2_87529|Pisum_sativum_v2_Contig7737_4	frv2_87529;frv2_47478	Pisum_sativum_v2_Contig7737_4 Thioredoxin n=1 Tax=Medicago truncatula RepID=B7FIZ6_MEDTR (UniRef100_B7FIZ6 icov:97% qcovs:84.92% e-val:3e-69)	redox.thioredoxin		0.68946	0.0073737	0.0144079	1.48568	0.513702	0.308887	0.265842	0.384828	0.265394	1.30449	0.794001	0.308174	0.780583	0.50476	0.568427	1	nan	nan	1.08448	0.00699426	0.143846	1.35194	0.188212	0.078541
>generic|frv2_83412|Pisum_sativum_v2_Contig5679_2	frv2_83412;frv2_48594	Pisum_sativum_v2_Contig5679_2 PREDICTED: 26S proteasome non-ATPase regulatory subunit 13-like n=1 Tax=Cicer arietinum RepID=UPI00032A7E86 (UniRef100_UPI00032A7E86 icov:96% qcovs:96.37% e-val:0)	protein.degradation.ubiquitin.proteasom		0.780386	0.0435738	0.0424356	1.14569	0.18769	0.223773	0.306714	0.23333	0.224643	0.981731	0.00324535	0.0119803	1.02459	0.907759	0.685356	1.03546	0.963046	0.720682	0.899647	0.155352	0.48784	1.97923	0.251786	0.0944281
>generic|frv2_49709|franssen_30594_1	frv2_49709;frv2_76099;frv2_103015	franssen_30594_1 PREDICTED: 60S acidic ribosomal protein P1-3-like n=1 Tax=Cicer arietinum RepID=UPI00032AAD44 (UniRef100_UPI00032AAD44 icov:81% qcovs:75.89% e-val:1e-35)	protein.synthesis.ribosomal protein.eukaryotic.60S subunit.P1		1.27794	0.0207905	0.0279106	1.0479	0.359932	0.286797	0.90963	0.871561	0.384356	1.01572	0.658336	0.274943	1.01425	0.930001	0.689397	1.0558	0.762446	0.664459	0.299038	0.0737022	0.385792	0.17437	0.0815809	0.0534562
>generic|frv2_110794|p.sativum_wa1_contig17528_6	frv2_110794;frv2_10918	p.sativum_wa1_contig17528_6 60S ribosomal protein L13 n=2 Tax=Medicago truncatula RepID=G7KWF6_MEDTR (UniRef100_G7KWF6 icov:99% qcovs:97.58% e-val:1e-144)	protein.synthesis.ribosomal protein.eukaryotic.60S subunit.L13		0.566041	0.000211383	0.0040529	1.61305	0.600485	0.334088	0.572381	0.0664746	0.109559	1.20188	0.941171	0.34358	1.35902	0.200907	0.450884	1.05976	0.932731	0.71756	1.7786	0.141624	0.482694	6.58532	0.0680163	0.0483726
>generic|frv2_49943|franssen_30763_1	frv2_49943;O23714;frv2_75870;frv2_75871;frv2_75873;frv2_59437	franssen_30763_1 Uncharacterized protein n=2 Tax=Soja RepID=C6SW24_SOYBN (UniRef100_C6SW24 icov:97% qcovs:97.06% e-val:7e-146)	protein.degradation.ubiquitin.proteasom		1.53616	0.00565567	0.0130909	0.761093	0.824003	0.377034	0.347945	0.205688	0.211651	0.707743	0.1265	0.0945807	1.21548	0.0586882	0.342211	1.11899	0.804196	0.676259	0.338538	0.599022	0.593857	0.886759	0.0859962	0.0545452
>generic|carvalho17572|PsCam023082_1_AA	F4JL11;frv2_120262	PsCam023082_1_AA Importin subunit alpha-2 OS=Arabidopsis thaliana GN=IMPA2 PE=1 SV=1 (sp	protein.targeting.nucleus		1.58887	0.00891919	0.0159079	0.78335	0.326914	0.27944	1.62779	0.626535	0.32235	0.842998	0.00117573	0.00887782	1.15005	0.421815	0.547231	1.12207	0.60303	0.621285	0.774991	0.695023	0.623814	0.915348	0.592004	0.171763
>generic|frv2_119638|p.sativum_wa1_contig25129_5	frv2_119638;frv2_119448	p.sativum_wa1_contig25129_5 PREDICTED: proteasome subunit alpha type-6-like isoform X2 n=1 Tax=Cicer arietinum RepID=UPI00032A947F (UniRef100_UPI00032A947F icov:99% qcovs:98.37% e-val:7e-180)	protein.degradation.ubiquitin.proteasom		1.57799	0.000724391	0.00766286	1.08637	0.119145	0.176617	0.641629	0.0258639	0.0581503	0.87508	0.0109171	0.0223894	1.00917	0.941292	0.692282	1.18309	0.588291	0.62084	0.677095	0.752704	0.641278	1.55896	0.309841	0.108722
>generic|frv2_51802|franssen_32053_3	frv2_51802;C4K126;frv2_96286;frv2_75700;frv2_96281	franssen_32053_3 Thioredoxin protein n=1 Tax=Medicago truncatula RepID=A0A072TFE0_MEDTR (UniRef100_A0A072TFE0 icov:97% qcovs:80.44% e-val:4e-126)	not assigned.unknown		1.59302	0.0102456	0.017365	1.7887	0.310222	0.272853	0.562027	0.217812	0.215572	0.880675	0.0426727	0.0497456	0.790037	0.114686	0.392139	1.19973	0.585626	0.62084	0.771793	0.239531	0.549017	1.35133	0.0187235	0.0266296
>generic|frv2_106111|p.sativum_wa1_contig13801_6	frv2_106111;Q9LUX9	p.sativum_wa1_contig13801_6 NAD(P)H:quinone oxidoreductase, type IV protein n=1 Tax=Medicago truncatula RepID=G7K6C8_MEDTR (UniRef100_G7K6C8 icov:98% qcovs:96.55% e-val:2e-141)	lipid metabolism.exotics(steroids, squalene etc)		0.747719	0.00579398	0.0132644	1.25501	0.474784	0.302738	0.360045	0.498005	0.292915	0.925624	0.255012	0.140273	0.815596	0.559113	0.585163	1.21243	0.833092	0.685036	3.16193	0.12032	0.460388	2.99894	0.381612	0.124851
>generic|carvalho12250|PsCam011009_1_AA	P54235	PsCam011009_1_AA Glucose-6-phosphate isomerase, cytosolic 1 OS=Clarkia concinna GN=PGIC1 PE=3 SV=1 (sp	glycolysis.cytosolic branch.glucose-6-phosphate isomerase		0.743162	0.0472877	0.0444986	0.797329	0.228237	0.239614	0.844655	0.18881	0.200171	0.520882	0.010388	0.0220992	0.925212	0.243598	0.482083	1.21427	0.64371	0.627871	0.242016	0.236043	0.549017	0.412586	0.715208	0.197831	X
>generic|frv2_75710|Pisum_sativum_v2_Contig1344_4	frv2_75710	Pisum_sativum_v2_Contig1344_4 60S ribosomal protein L26-1 n=1 Tax=Medicago truncatula RepID=G7ILF2_MEDTR (UniRef100_G7ILF2 icov:92% qcovs:97.95% e-val:2e-98)	protein.synthesis.ribosomal protein.eukaryotic.60S subunit.L26		0.709337	0.0064386	0.0139714	1.53337	0.812243	0.376643	0.504719	0.553205	0.305245	0.886132	0.86294	0.323957	1.6294	0.168456	0.442001	1.21936	0.749092	0.663667	1.4037	0.250298	0.558227	1.41464	0.0356119	0.0357933	X
>generic|frv2_55386|franssen_34438_6	frv2_55386	franssen_34438_6 PREDICTED: leucine--tRNA ligase, cytoplasmic-like isoform X1 n=2 Tax=Cicer arietinum RepID=UPI00032A6F60 (UniRef100_UPI00032A6F60 icov:95% qcovs:84.71% e-val:0)	protein.aa activation.leucine-tRNA ligase		0.825007	0.00809261	0.0149553	1.81312	0.448785	0.302599	0.0963634	0.448879	0.281152	0.949178	0.0699798	0.0666188	1.19624	0.306542	0.498824	1.2238	0.742676	0.662397	1.47439	0.381173	0.560593	6.32296	0.261673	0.0968899	X
>generic|carvalho31316|PsCam045006_1_AA	Q9SIB9	PsCam045006_1_AA Aconitate hydratase 2, mitochondrial OS=Arabidopsis thaliana GN=ACO2 PE=1 SV=2 (sp	TCA / org transformation.TCA.aconitase		1.35936	0.000912504	0.00789628	1.29777	0.833569	0.38097	1.13899	0.118733	0.154975	1.03718	0.632265	0.266587	0.905138	0.299961	0.497458	1.23487	0.562732	0.618661	3.68611	0.810519	0.661259	3.24952	0.263715	0.097337	X
>generic|frv2_111928|p.sativum_wa1_contig18840_3	frv2_111928;frv2_46849	p.sativum_wa1_contig18840_3 PREDICTED: 40S ribosomal protein SA-like n=1 Tax=Cicer arietinum RepID=UPI00032A6B11 (UniRef100_UPI00032A6B11 icov:97% qcovs:91.45% e-val:0)	protein.synthesis.ribosomal protein.eukaryotic.40S subunit.SA		1.24465	0.000133064	0.00291573	1.51451	0.711781	0.349525	0.621894	0.668065	0.335608	0.651834	0.0227231	0.0337031	1.12137	0.426647	0.548488	1.24446	0.100444	0.593758	0.555507	0.570553	0.589252	0.79527	0.825307	0.219533
>generic|frv2_54270|franssen_33718_4	frv2_54270;O82663;Q6ZDY8;frv2_78122	franssen_33718_4 Succinate dehydrogenase [ubiquinone] flavoprotein subunit n=3 Tax=Medicago truncatula RepID=G7KDJ3_MEDTR (UniRef100_G7KDJ3 icov:100% qcovs:98.04% e-val:0)	TCA / org transformation.TCA.succinate dehydrogenase		1.32897	0.00972055	0.0168857	1.25123	0.64023	0.338541	0.994376	0.894302	0.38896	1.02061	0.856158	0.321774	1.18277	0.257406	0.486906	1.26224	0.385684	0.593758	1.12266	0.39589	0.560593	1.26866	0.0226127	0.0284131
>generic|frv2_107216|p.sativum_wa1_contig14617_6	frv2_107216	p.sativum_wa1_contig14617_6 Alpha-1,4-glucan-protein synthase [UDP-forming] n=1 Tax=Pisum sativum RepID=UPTG_PEA (UniRef100_O04300 icov:97% qcovs:100% e-val:0)	cell wall.cell wall proteins.RGP		0.629667	0.00106217	0.00796634	1.55074	0.999292	0.422556	1.68243	0.814547	0.372648	1.10242	0.00529368	0.0147795	1.29084	0.141198	0.42723	1.27086	0.386253	0.593758	1.87649	0.506076	0.569931	2.07004	0.180023	0.0770535	X
>generic|frv2_99187|p.sativum_wa1_contig07415_4	frv2_99187;Q9LMU0	p.sativum_wa1_contig07415_4 GDP-4-keto-6-deoxymannose-3, 5-epimerase-4-reductase n=1 Tax=Medicago truncatula RepID=G7KRU3_MEDTR (UniRef100_G7KRU3 icov:93% qcovs:93.85% e-val:0)	cell wall.precursor synthesis.GER		1.51914	0.0291261	0.0324445	1.86147	0.461489	0.302738	0.212717	0.518852	0.296783	1.77988	0.816801	0.313228	0.72444	0.406303	0.544356	1.27367	0.749113	0.663667	3.6061	0.863538	0.678043	0.875279	0.551717	0.164577
>generic|frv2_104383|p.sativum_wa1_contig12414_4	frv2_104383;Q8LE52	p.sativum_wa1_contig12414_4 Dehydroascorbate reductase n=1 Tax=Medicago truncatula RepID=Q4JR85_MEDTR (UniRef100_Q4JR85 icov:99% qcovs:90.91% e-val:1e-175)	redox.ascorbate and glutathione.ascorbate		1.46317	0.0121549	0.0192206	0.572104	0.41238	0.298912	0.522969	0.0467566	0.0861916	0.401595	0.925643	0.339442	0.940452	0.384138	0.529568	1.33851	0.60795	0.621285	0.328212	0.340211	0.560593	0.312191	0.105978	0.0595901
>generic|frv2_76015|Pisum_sativum_v2_Contig1565_6	frv2_76015;frv2_1836	Pisum_sativum_v2_Contig1565_6 60S ribosomal protein L9 n=1 Tax=Pisum sativum RepID=RL9_PEA (UniRef100_P30707 icov:87% qcovs:98.96% e-val:5e-133)	protein.synthesis.ribosomal protein.eukaryotic.60S subunit.L9		0.828724	0.0243339	0.0302094	1.23162	0.53408	0.316958	0.543658	0.806923	0.370555	0.816549	0.316328	0.166029	1.23002	0.098455	0.378925	1.35018	0.237128	0.593758	0.491931	0.681266	0.617974	0.751464	0.842499	0.222068
>generic|frv2_47426|franssen_29078_3	frv2_47426;frv2_103098;frv2_78371	franssen_29078_3 Isocitrate dehydrogenase [NADP] n=1 Tax=Pisum sativum RepID=Q6R6M7_PEA (UniRef100_Q6R6M7 icov:93% qcovs:99.51% e-val:0)	TCA / org transformation.TCA.IDH		1.43598	0.000913578	0.00789628	1.42652	0.694122	0.344163	3.32884	0.583047	0.309811	1.13425	0.00716678	0.0183461	1.17302	0.219414	0.472915	1.39458	0.173668	0.593758	0.645573	0.378185	0.560593	1.1715	0.0054897	0.0135471
>generic|frv2_52145|franssen_32295_1	frv2_52145;frv2_81997	franssen_32295_1 Eukaryotic translation initiation factor 3 subunit M n=1 Tax=Medicago truncatula RepID=A0A072U6R5_MEDTR (UniRef100_A0A072U6R5 icov:94% qcovs:93.41% e-val:0)	protein.degradation.ubiquitin.proteasom		1.89639	0.0256872	0.0306482	0.892284	0.472001	0.302738	1.70749	0.731599	0.350304	1.08506	0.67878	0.27773	0.84212	0.425849	0.548488	1.45497	0.662822	0.628376	1.00597	0.531783	0.577495	1.65188	0.0949694	0.05695
>generic|frv2_55265|franssen_34353_4	frv2_55265;frv2_84798;P9WI79	franssen_34353_4 Calcium-dependent phosphotriesterase superfamily protein n=1 Tax=Medicago truncatula RepID=G7ICX7_MEDTR (UniRef100_G7ICX7 icov:97% qcovs:83.84% e-val:0)	not assigned.unknown		1.36233	0.00393033	0.01155	0.993933	0.0860754	0.146215	0.857044	0.157991	0.184488	0.807897	0.0473857	0.053187	0.926898	0.433273	0.552428	1.51494	0.382982	0.593758	0.656631	0.349462	0.560593	0.698104	0.064016	0.0468457
>generic|frv2_51868|franssen_32100_6	frv2_51868;frv2_121960;frv2_51866;Q8DI01	franssen_32100_6 Beta-hydroxyacyl-ACP dehydratase n=1 Tax=Medicago truncatula RepID=A0A072UPD2_MEDTR (UniRef100_A0A072UPD2 icov:99% qcovs:88.18% e-val:2e-138)	lipid metabolism.FA synthesis and FA elongation.beta hydroxyacyl ACP dehydratase		1.48647	0.045029	0.0433029	0.627643	0.352374	0.286797	0.343845	0.311799	0.251914	0.774837	0.0114232	0.0230014	1.03799	0.764544	0.641778	1.5234	0.360472	0.593758	1.74934	0.802178	0.65856	1.87588	0.342171	0.115679
>generic|carvalho16397|PsCam021037_1_AA	Q42896;frv2_117858	PsCam021037_1_AA Fructokinase-2 OS=Solanum lycopersicum GN=FRK2 PE=2 SV=2 (sp	major CHO metabolism.degradation.sucrose.fructokinase		1.23518	0.0223543	0.0291815	1.04399	0.425321	0.298912	0.569411	0.380338	0.263232	0.759954	0.0741131	0.0685354	1.22643	0.141124	0.42723	1.52676	0.210796	0.593758	0.734811	0.282348	0.560593	0.455835	0.0885748	0.0549526
>generic|frv2_111652|p.sativum_wa1_contig18578_2	frv2_111652;Q9SRT9	p.sativum_wa1_contig18578_2 Alpha-1,4-glucan-protein synthase [UDP-forming]-like protein n=1 Tax=Medicago truncatula RepID=A0A072TX38_MEDTR (UniRef100_A0A072TX38 icov:99% qcovs:95.53% e-val:0)	cell wall.cell wall proteins.RGP		1.33898	0.0499833	0.0464651	1.51413	0.125918	0.183226	0.42492	0.366706	0.262513	0.781171	0.804687	0.310508	1.18748	0.367048	0.525527	1.5685	0.193886	0.593758	0.489439	0.685242	0.617974	0.611257	0.0638169	0.0468457
>generic|frv2_86774|Pisum_sativum_v2_Contig7361_2	frv2_86774;frv2_51485;Q7DLR9;frv2_125801	Pisum_sativum_v2_Contig7361_2 PREDICTED: proteasome subunit beta type-4-like n=1 Tax=Cicer arietinum RepID=UPI00032AC454 (UniRef100_UPI00032AC454 icov:95% qcovs:96.55% e-val:4e-164)	protein.degradation.ubiquitin.proteasom		1.27469	0.032089	0.034662	0.589418	0.991804	0.421131	0.272429	0.517837	0.296638	1.14056	0.0743216	0.0685354	1.18646	0.249147	0.483783	1.57257	0.468616	0.602515	0.246246	0.456149	0.563553	0.37	0.107957	0.0596759
>generic|frv2_83949|Pisum_sativum_v2_Contig5946_3	frv2_83949;frv2_42004;O81155;frv2_35341	Pisum_sativum_v2_Contig5946_3 PREDICTED: cysteine synthase, mitochondrial-like n=1 Tax=Cicer arietinum RepID=UPI00032A8A60 (UniRef100_UPI00032A8A60 icov:96% qcovs:88.04% e-val:0)	amino acid metabolism.synthesis.serine-glycine-cysteine group.cysteine.OASTL		1.87757	0.0437911	0.0424806	1.66614	0.721707	0.353085	0.0750655	0.858627	0.383686	1.64533	0.0116881	0.0232529	1.10428	0.764542	0.641778	1.59334	0.361757	0.593758	1.13034	0.345148	0.560593	3.83854	0.10007	0.0579238
>generic|frv2_56385|franssen_35070_2	frv2_56385	franssen_35070_2 NAD(P)-binding rossmann-fold protein n=1 Tax=Medicago truncatula RepID=I3SNR4_MEDTR (UniRef100_I3SNR4 icov:99% qcovs:86.14% e-val:2e-167)	secondary metabolism.N misc.alkaloid-like		1.65655	0.0380506	0.0383975	0.647063	0.892523	0.396469	3.19837	0.541634	0.303079	0.887006	0.261759	0.143272	0.842528	0.382727	0.529552	1.65258	0.508834	0.606728	1.72279	0.56243	0.589252	1.39402	0.519052	0.157246	X
>generic|frv2_112647|p.sativum_wa1_contig19498_5	frv2_112647	p.sativum_wa1_contig19498_5 Arginine biosynthesis bifunctional protein ArgJ, chloroplastic n=1 Tax=Medicago truncatula RepID=A0A072VLB2_MEDTR (UniRef100_A0A072VLB2 icov:92% qcovs:91.7% e-val:0)	amino acid metabolism.synthesis.glutamate family.arginine.acetylglutamate kinase		1.47915	0.00765057	0.0146686	1.92344	0.371636	0.286797	2.09074	0.350691	0.262513	1.13386	0.00400668	0.0133343	1.04883	0.778627	0.647771	1.66533	0.180241	0.593758	1.50633	0.123693	0.462478	1.60842	0.0251067	0.0297292	X
>generic|frv2_80369|Pisum_sativum_v2_Contig4153_5	frv2_80369	Pisum_sativum_v2_Contig4153_5 PREDICTED: prohibitin-1, mitochondrial-like n=1 Tax=Cicer arietinum RepID=UPI00032AC4CA (UniRef100_UPI00032AC4CA icov:93% qcovs:97.58% e-val:0)	mitochondrial electron transport / ATP synthesis.NADH-DH.complex I		1.84627	0.00275988	0.0106127	1.13453	0.241825	0.249251	2.04321	0.6802	0.337893	1.23273	0.0276321	0.0374713	1.12015	0.317644	0.50134	1.73416	0.332246	0.593758	1.0558	0.116303	0.452966	2.44234	0.0875653	0.0549526	X
>generic|frv2_120997|p.sativum_wa1_contig26093_5	frv2_120997	p.sativum_wa1_contig26093_5 110 kDa 4SNc-Tudor domain protein n=3 Tax=Pisum sativum RepID=Q8L5C2_PEA (UniRef100_Q8L5C2 icov:99% qcovs:98.77% e-val:0)	RNA.regulation of transcription.Zn-finger(CCHC)		1.23682	0.0160803	0.0231522	1.67499	0.524111	0.312408	2.22694	0.698668	0.343123	0.906487	0.958856	0.347403	0.881068	0.178957	0.442581	1.7393	0.267247	0.593758	1.49788	0.933653	0.692726	2.69299	0.0804154	0.0530515	X
>generic|frv2_49121|franssen_30200_4	frv2_49121;frv2_114468;frv2_5922;Q9FT97	franssen_30200_4 Alpha-galactosidase n=1 Tax=Pisum sativum RepID=Q5ZP79_PEA (UniRef100_Q5ZP79 icov:99% qcovs:99.51% e-val:0)	minor CHO metabolism.galactose.alpha-galactosidases		0.827368	0.076576	0.0605448	0.70138	0.0182338	0.06014	1.3776	0.343934	0.262513	0.822964	3.18415e-05	0.00189712	1.99126	0.00265676	0.10054	0.851986	0.760913	0.663998	1.61645	0.746522	0.637738	2.35813	0.0718826	0.0491733
>generic|frv2_82229|Pisum_sativum_v2_Contig5090_3	frv2_82229;Q96558	Pisum_sativum_v2_Contig5090_3 UDP-glucose 6-dehydrogenase n=1 Tax=Galega orientalis RepID=E7D037_9FABA (UniRef100_E7D037 icov:99% qcovs:98.12% e-val:0)	cell wall.precursor synthesis.UDP-Glc dehydrogenase (UGD)		1.11616	0.239822	0.119822	0.603962	1.62064e-05	0.00204807	1.10481	1.22259e-05	0.00067934	0.849845	0.736352	0.295454	1.29535	0.0153412	0.203936	1.4938	0.145722	0.593758	0.750846	0.624557	0.60631	0.694128	0.815392	0.21886
>generic|frv2_54858|franssen_34094_6	frv2_54858	franssen_34094_6 Alpha-dioxygenase n=1 Tax=Pisum sativum RepID=Q5GQ66_PEA (UniRef100_Q5GQ66 icov:100% qcovs:99.34% e-val:0)	stress.abiotic		0.919765	0.235157	0.118456	0.648531	0.00100721	0.0137464	0.599059	5.00874e-05	0.0011664	1.05469	0.0508987	0.055995	0.765993	0.0192394	0.22845	0.655966	0.637747	0.627871	2.01356	0.681947	0.617974	2.22708	0.165548	0.0738384	X
>generic|frv2_46860|franssen_28731_4	frv2_46860;frv2_101162;frv2_46857	franssen_28731_4 Aldo/keto reductase n=1 Tax=Medicago truncatula RepID=A2Q5A8_MEDTR (UniRef100_A2Q5A8 icov:98% qcovs:89.12% e-val:0)	hormone metabolism.auxin.induced-regulated-responsive-activated		1.04479	0.547943	0.221836	0.569606	0.00793225	0.0373753	1.09027	0.00892424	0.0308403	1.06463	0.579483	0.253658	0.768384	0.0231682	0.243399	0.710982	0.553449	0.618661	1.13437	0.098866	0.422803	1.0158	0.00552012	0.0135471
>generic|frv2_95873|p.sativum_wa1_contig02965_4	frv2_95873;frv2_42546	p.sativum_wa1_contig02965_4 Elongation factor 1-alpha n=1 Tax=Medicago truncatula RepID=A0A072VPF0_MEDTR (UniRef100_A0A072VPF0 icov:99% qcovs:97.54% e-val:0)	protein.synthesis.elongation		1.04285	0.561068	0.225583	0.794494	0.0345392	0.0828505	0.437985	0.0609527	0.103079	0.603358	0.0870704	0.074557	1.38504	0.0427407	0.3073	0.469839	0.257645	0.593758	1.09214	0.934665	0.692726	1.09729	0.000393874	0.00316825
>generic|carvalho31462|PsCam045172_1_AA	Q43191	PsCam045172_1_AA Probable linoleate 9S-lipoxygenase 5 OS=Solanum tuberosum GN=LOX1.5 PE=2 SV=1 (sp	hormone metabolism.jasmonate.synthesis-degradation.lipoxygenase		1.00112	0.992921	0.33336	0.627324	0.0153791	0.0555532	0.86516	0.00294821	0.0150527	1.89811	0.0096134	0.0210128	0.854908	0.711644	0.627201	0.277395	0.342027	0.593758	1.5792	0.284574	0.560593	7.53821	0.0520723	0.0576854	X
>generic|frv2_47574|franssen_29172_1	frv2_47574;frv2_47573;Q9LEV3	franssen_29172_1 Cystathionine beta-synthase (CBS) family protein n=2 Tax=Medicago truncatula RepID=G7K5X3_MEDTR (UniRef100_G7K5X3 icov:100% qcovs:96.32% e-val:8e-131)	not assigned.no ontology		0.866523	0.11021	0.075467	0.711943	0.00643979	0.0326772	0.79136	0.1445	0.173856	0.664639	0.014816	0.0261832	0.799128	0.152211	0.434084	0.346311	0.261158	0.593758	0.491842	0.220364	0.543696	9.86734	0.0570018	0.055862
>generic|frv2_25618|franssen_15114_6	frv2_25618;frv2_78269	franssen_15114_6 Processing peptidase n=1 Tax=Medicago truncatula RepID=G7L7C9_MEDTR (UniRef100_G7L7C9 icov:96% qcovs:93.53% e-val:0)	protein.targeting.mitochondria		0.926869	0.617221	0.241513	1.23201	0.0265048	0.0739347	0.948485	0.0072126	0.0266334	1.26386	0.0699741	0.0666188	1.07429	0.700558	0.622802	0.37991	0.274881	0.593758	0.609627	0.525456	0.577495	1.22768	0.215495	0.0853459
>generic|frv2_74711|Pisum_sativum_v2_Contig578_5	frv2_74711;frv2_74714;frv2_95135;frv2_95137;frv2_47301;frv2_135889;frv2_74715;frv2_3390;frv2_74721	Pisum_sativum_v2_Contig578_5 Eukaryotic translation initiation factor 5A n=1 Tax=Medicago truncatula RepID=I3T5P6_MEDTR (UniRef100_I3T5P6 icov:99% qcovs:97.5% e-val:2e-111)	protein.synthesis.initiation		0.903158	0.502358	0.208256	0.562179	0.0376814	0.0887739	5.43936	0.0531444	0.038441	1.61576	0.230813	0.13131	0.812169	0.225166	0.474074	0.384551	0.435686	0.602515	1.50621	0.643595	0.606723	8.37806	0.0573487	0.0447417
>generic|frv2_49142|franssen_30215_1	frv2_49142;frv2_81788	franssen_30215_1 Long-chain acyl-CoA synthetase n=1 Tax=Medicago truncatula RepID=G7IZP1_MEDTR (UniRef100_G7IZP1 icov:97% qcovs:87.88% e-val:0)	lipid metabolism.FA synthesis and FA elongation.acyl coa ligase		0.999032	0.981734	0.332067	0.690191	0.0101907	0.0424569	0.511931	0.000930107	0.00703186	0.712211	0.197227	0.118493	0.877116	0.23798	0.479687	0.474309	0.286544	0.593758	0.807225	0.274398	0.560593	0.690026	0.0670936	0.0478623
>generic|frv2_88944|Pisum_sativum_v2_Contig8447_2	frv2_88944;O04287	Pisum_sativum_v2_Contig8447_2 Peptidyl-prolyl cis-trans isomerase FKBP12 n=1 Tax=Vicia faba RepID=FKB12_VICFA (UniRef100_O04287 icov:91% qcovs:93.75% e-val:9e-71)	protein.folding		0.893439	0.201543	0.108091	0.555813	0.0140525	0.0534794	0.730647	0.079635	0.120623	1.06481	0.00365843	0.0129361	0.97073	0.807596	0.655994	0.502365	0.498241	0.606728	1.302	0.234285	0.549017	2.89622	0.0208554	0.0277997
>generic|carvalho31050|PsCam044624_1_AA	F4JWS8;frv2_128365;frv2_49129	PsCam044624_1_AA Cytochrome b-c1 complex subunit 7-2 OS=Arabidopsis thaliana GN=QCR7-2 PE=1 SV=1 (sp	mitochondrial electron transport / ATP synthesis.cytochrome c reductase		1.23324	0.212231	0.112059	1.49686	0.00189616	0.0166001	0.583345	0.00489441	0.0203828	0.435044	0.814707	0.312921	0.919858	0.515996	0.572128	0.504877	0.22471	0.593758	0.599856	0.305435	0.560593	0.867508	0.55797	0.165595
>generic|frv2_75926|Pisum_sativum_v2_Contig1508_4	frv2_75926;frv2_50370;Q41050;frv2_75924	Pisum_sativum_v2_Contig1508_4 Outer envelope pore protein 16, chloroplastic n=1 Tax=Pisum sativum RepID=OEP16_PEA (UniRef100_Q41050 icov:99% qcovs:99.32% e-val:2e-99)	protein.targeting.chloroplast		0.762184	0.131665	0.0829388	1.10412	0.00727018	0.0355245	0.741267	0.611473	0.318391	1.0071	0.379358	0.188961	0.746043	0.149011	0.434084	0.513314	0.298993	0.593758	2.04302	0.468204	0.563553	2.84019	0.0621066	0.0464248
>generic|frv2_46374|franssen_28447_1	frv2_46374;frv2_46371;frv2_75346;frv2_75348;frv2_120488;frv2_46372;Q9FJA6;frv2_74292;frv2_1943	franssen_28447_1 40S ribosomal S3-like protein n=1 Tax=Medicago truncatula RepID=B7FH64_MEDTR (UniRef100_B7FH64 icov:94% qcovs:100% e-val:6e-171)	protein.synthesis.ribosomal protein.eukaryotic.40S subunit.S3		0.709664	0.0890197	0.0653319	0.552234	0.0198157	0.0632494	6.36738	0.0540323	0.0604295	0.667279	0.835901	0.317432	1.22439	0.291504	0.496739	0.539009	0.388631	0.594506	1.21028	0.317874	0.560593	1.31645	0.641041	0.181734
>generic|frv2_50171|franssen_30922_1	frv2_50171;frv2_85448	franssen_30922_1 Aldose 1-epimerase n=1 Tax=Medicago truncatula RepID=G7KPT9_MEDTR (UniRef100_G7KPT9 icov:94% qcovs:90.72% e-val:0)	minor CHO metabolism.others		0.887798	0.0742576	0.0596339	0.901659	0.00451614	0.0259626	1.52067	0.0469869	0.0862076	1.19275	0.0344186	0.0423525	0.838747	0.0983414	0.378925	0.554273	0.297072	0.593758	1.24909	0.18203	0.502549	1.35649	0.0138476	0.0235784
>generic|frv2_96002|p.sativum_wa1_contig03258_5	frv2_96002	p.sativum_wa1_contig03258_5 Albumin-2 n=2 Tax=Pisum sativum RepID=ALB2_PEA (UniRef100_P08688 icov:94% qcovs:96.97% e-val:5e-164)	not assigned.unknown		1.01493	0.790619	0.28771	0.654938	0.0169826	0.0569763	0.532568	0.0302124	0.0650786	0.509392	0.0603004	0.0621913	0.941685	0.505695	0.568427	0.561444	0.364691	0.593758	0.636456	0.14464	0.485331	0.572967	0.011214	0.0207896	X
>generic|frv2_47151|franssen_28904_1	frv2_47151;frv2_85903;P07694	franssen_28904_1 Glutamine synthetase root isozyme A n=1 Tax=Pisum sativum RepID=GLNA3_PEA (UniRef100_P07694 icov:92% qcovs:100% e-val:0)	N-metabolism.ammonia metabolism.glutamine synthetase		0.981044	0.54583	0.221564	0.545236	0.00448914	0.0259626	1.41228	0.00241651	0.0132383	1.19186	0.0220742	0.0334519	1.09333	0.191997	0.442581	0.571897	0.392225	0.594506	1.27089	0.434206	0.560593	2.2486	0.0985348	0.0574017
>generic|frv2_74133|Pisum_sativum_v2_Contig220_4	frv2_74133;frv2_47056;Q39173	Pisum_sativum_v2_Contig220_4 NADP-dependent alkenal double bond reductase n=1 Tax=Medicago truncatula RepID=A0A072TLD5_MEDTR (UniRef100_A0A072TLD5 icov:99% qcovs:85.47% e-val:0)	misc.oxidases - copper, flavone etc		1.03947	0.646483	0.248214	0.743428	0.00206224	0.0166001	0.691229	0.00149469	0.00956447	0.906229	0.148369	0.101219	0.873124	0.141958	0.42723	0.59518	0.570608	0.62084	0.730816	0.772981	0.646763	0.667611	0.334893	0.114379
>generic|frv2_111127|p.sativum_wa1_contig18062_4	frv2_111127	p.sativum_wa1_contig18062_4 Uncharacterized protein n=1 Tax=Medicago truncatula RepID=G7IEX3_MEDTR (UniRef100_G7IEX3 icov:95% qcovs:94.93% e-val:0)	protein.targeting.secretory pathway.vacuole		1.30342	0.0616082	0.052209	1.24269	0.00591109	0.0322486	0.875765	0.105719	0.145879	1.11053	0.0642765	0.0632956	0.865294	0.531953	0.578654	0.602178	0.164624	0.593758	1.19211	0.0109067	0.185468	2.48818	0.643237	0.182097	X
>generic|frv2_80085|Pisum_sativum_v2_Contig4003_6	frv2_80085	Pisum_sativum_v2_Contig4003_6 Lipoprotein n=1 Tax=Medicago truncatula RepID=G7JBD4_MEDTR (UniRef100_G7JBD4 icov:98% qcovs:84.1% e-val:2e-154)	not assigned.unknown		1.11227	0.0776701	0.0610949	0.794179	0.0291953	0.0758765	4.72371	0.0554725	0.0524062	1.69608	0.00128309	0.00926721	0.926368	0.624727	0.611683	0.655038	0.417335	0.599086	2.85198	0.894542	0.685443	7.0648	0.0520368	0.0589816	X
>generic|frv2_97393|p.sativum_wa1_contig05429_4	frv2_97393;frv2_75208;frv2_46495;frv2_2095;frv2_75210;frv2_51107;frv2_75214	p.sativum_wa1_contig05429_4 Thioredoxin h n=1 Tax=Pisum sativum RepID=Q8GUR9_PEA (UniRef100_Q8GUR9 icov:89% qcovs:97.65% e-val:4e-51)	redox.thioredoxin		0.829642	0.428527	0.186468	0.835598	0.012035	0.0481146	4.61963	0.190748	0.201065	0.877448	0.0383568	0.0460057	1.11158	0.642225	0.613214	0.656326	0.0872686	0.593758	1.37597	0.103624	0.432987	1.09533	0.603653	0.174491
>generic|frv2_105536|p.sativum_wa1_contig13367_5	frv2_105536;frv2_11487	p.sativum_wa1_contig13367_5 PREDICTED: uncharacterized oxidoreductase At4g09670-like n=1 Tax=Cicer arietinum RepID=UPI00032AC531 (UniRef100_UPI00032AC531 icov:96% qcovs:85.32% e-val:0)	not assigned.no ontology		1.09175	0.207958	0.110183	0.722704	0.00129746	0.0146722	0.612451	0.000116371	0.00188458	1.32796	0.716976	0.289086	0.924833	0.148382	0.434084	0.656957	0.465907	0.602515	2.83265	0.242494	0.549017	1.89493	0.00883806	0.0185735
>generic|frv2_47838|franssen_29343_1	frv2_47838;frv2_82703	franssen_29343_1 Putative uncharacterized protein n=1 Tax=Trifolium pratense RepID=Q2PEZ2_TRIPR (UniRef100_Q2PEZ2 icov:99% qcovs:89.47% e-val:0)	RNA.regulation of transcription.unclassified		1.36882	0.0640086	0.0536504	0.508315	0.0208577	0.0644948	12.9782	0.0582534	0.059184	0.936308	0.0112611	0.0228768	1.08104	0.113086	0.391612	0.658333	0.643108	0.627871	1.83196	0.379794	0.560593	2.56398	0.173131	0.0756299
>generic|frv2_112029|p.sativum_wa1_contig18952_5	frv2_112029	p.sativum_wa1_contig18952_5 PREDICTED: UTP--glucose-1-phosphate uridylyltransferase-like n=1 Tax=Cicer arietinum RepID=UPI00032A7EB9 (UniRef100_UPI00032A7EB9 icov:96% qcovs:95.1% e-val:0)	glycolysis.cytosolic branch.UGPase		0.903196	0.0826617	0.0634018	0.695081	0.0253497	0.0732351	1.3907	0.0732344	0.117223	1.06998	0.00734024	0.0183461	0.921003	0.411127	0.544356	0.67453	0.331521	0.593758	1.95257	0.183305	0.503943	1.5763	0.101323	0.0583905	X
>generic|frv2_86875|Pisum_sativum_v2_Contig7411_2	frv2_86875;Q8LD27	Pisum_sativum_v2_Contig7411_2 Proteasome subunit beta type n=1 Tax=Medicago truncatula RepID=B7FGZ8_MEDTR (UniRef100_B7FGZ8 icov:85% qcovs:96.98% e-val:4e-164)	protein.degradation.ubiquitin.proteasom		1.27726	0.109342	0.0752146	0.846947	0.0187246	0.0612485	0.745464	0.0878318	0.128432	1.87677	0.0214179	0.0329181	1.16396	0.484301	0.563493	0.682665	0.367216	0.593758	1.86412	0.571088	0.589252	1.96078	0.198185	0.0809646
>generic|frv2_80789|Pisum_sativum_v2_Contig4373_2	frv2_80789;Q42560	Pisum_sativum_v2_Contig4373_2 Aconitate hydratase n=2 Tax=Medicago truncatula RepID=G7JYQ8_MEDTR (UniRef100_G7JYQ8 icov:98% qcovs:95.67% e-val:0)	TCA / org transformation.TCA.aconitase		1.16551	0.0672024	0.0554189	0.71495	0.00173143	0.0165672	1.69146	0.000644153	0.00582673	1.20135	0.0375325	0.0451802	0.931552	0.157405	0.436039	0.715177	0.681448	0.632535	1.06024	0.684513	0.617974	0.675288	0.620658	0.178083
>generic|carvalho15295|PsCam017116_1_AA	Q43814;frv2_114822	PsCam017116_1_AA Ornithine carbamoyltransferase, chloroplastic OS=Pisum sativum GN=ARGF PE=2 SV=1 (sp	amino acid metabolism.synthesis.glutamate family.arginine.ornithine carbamoyltransferase		0.750656	0.363034	0.16647	0.768004	0.0101276	0.0424569	0.361947	0.056819	0.055503	1.18916	0.20509	0.121894	1.10001	0.619751	0.61066	0.715427	0.659664	0.627901	2.26709	0.920598	0.691797	2.13826	0.491117	0.150741
>generic|carvalho33957|PsCam048864_1_AA	Q9M0S5	PsCam048864_1_AA Isoamylase 3, chloroplastic OS=Arabidopsis thaliana GN=ISA3 PE=2 SV=2 (sp	major CHO metabolism.degradation.starch.ISA3		0.808905	0.0654461	0.0544093	0.957194	0.00275019	0.019791	1.43965	0.0228491	0.0538629	0.881173	0.0127909	0.0244231	0.888389	0.0685236	0.358007	0.740541	0.598441	0.621285	1.36382	0.0137546	0.199995	1.35929	0.0489378	0.0422638	X
>generic|frv2_120993|p.sativum_wa1_contig26090_5	frv2_120993	p.sativum_wa1_contig26090_5 PREDICTED: heat shock 70 kDa protein 8-like isoform X1 n=1 Tax=Cicer arietinum RepID=UPI00032A91E3 (UniRef100_UPI00032A91E3 icov:100% qcovs:82.35% e-val:0)	stress.abiotic.heat		0.936912	0.595744	0.236426	0.778113	0.0459531	0.10334	0.444592	0.0576701	0.0866435	0.620006	0.207769	0.122651	1.08402	0.493311	0.563493	0.774473	0.673884	0.631034	1.04299	0.0388602	0.315244	1.74663	0.0210712	0.0278661	X
>generic|frv2_113392|p.sativum_wa1_contig20179_5	frv2_113392	p.sativum_wa1_contig20179_5 Aldehyde dehydrogenase n=1 Tax=Medicago truncatula RepID=G7J4Y0_MEDTR (UniRef100_G7J4Y0 icov:96% qcovs:91.91% e-val:0)	fermentation.aldehyde dehydrogenase		1.14251	0.0852487	0.0641618	0.74695	0.00285581	0.0201841	0.57654	0.00290395	0.0150527	0.776906	0.0751311	0.0687642	1.00824	0.920449	0.687193	0.792942	0.731625	0.659345	0.930959	0.113572	0.445075	1.04064	0.018836	0.0266296	X
>generic|frv2_81144|Pisum_sativum_v2_Contig4550_2	frv2_81144	Pisum_sativum_v2_Contig4550_2 Polyadenylate-binding protein n=1 Tax=Medicago truncatula RepID=G7JK09_MEDTR (UniRef100_G7JK09 icov:98% qcovs:95.36% e-val:0)	RNA.processing		1.17983	0.156037	0.0913155	0.55085	0.00872235	0.0398022	0.516831	0.0133187	0.03866	0.931259	0.0480969	0.0538034	0.953941	0.715478	0.628803	0.804227	0.452754	0.602515	1.35603	0.755973	0.642947	1.44451	0.289535	0.10343	X
>generic|frv2_101412|p.sativum_wa1_contig09595_4	frv2_101412	p.sativum_wa1_contig09595_4 PREDICTED: annexin D1-like isoform X3 n=1 Tax=Cicer arietinum RepID=UPI00032AB729 (UniRef100_UPI00032AB729 icov:99% qcovs:88.29% e-val:0)	cell.organisation		1.18465	0.092438	0.0675176	0.734843	0.00349485	0.0234447	0.909064	0.00140468	0.00926039	0.948961	0.59458	0.258225	0.798605	0.0871686	0.369659	0.809282	0.349609	0.593758	1.36563	0.110464	0.445075	2.31777	0.526212	0.159002	X
>generic|frv2_82126|Pisum_sativum_v2_Contig5039_1	frv2_82126	Pisum_sativum_v2_Contig5039_1 Aspartic proteinase n=1 Tax=Cicer arietinum RepID=A0A060A425_CICAR (UniRef100_A0A060A425 icov:93% qcovs:85.83% e-val:0)	protein.degradation.aspartate protease		1.03176	0.947103	0.322827	1.07511	0.0169867	0.0569763	0.924446	0.0202203	0.0494646	1.33849	0.798494	0.309196	1.21752	0.395166	0.538773	0.817627	0.663968	0.628376	0.61299	0.0909782	0.415986	0.724392	0.0614698	0.0462995	X
>generic|frv2_51508|franssen_31850_3	frv2_51508;frv2_77481	franssen_31850_3 RuBisCO large subunit-binding protein subunit alpha, chloroplastic n=1 Tax=Pisum sativum RepID=RUBA_PEA (UniRef100_P08926 icov:95% qcovs:100% e-val:0)	PS.calvin cycle.rubisco interacting		1.08453	0.543328	0.221352	0.655882	0.00769956	0.036716	1.80272	0.0235857	0.0549334	1.03089	0.0551242	0.0590786	1.01708	0.87249	0.674918	0.840067	0.506611	0.606728	1.08305	0.067325	0.38153	0.970757	0.286884	0.102696
>generic|carvalho15312|PsCam017148_1_AA	Q9FF55;frv2_55191	PsCam017148_1_AA Protein disulfide isomerase-like 1-4 OS=Arabidopsis thaliana GN=PDIL1-4 PE=1 SV=1 (sp	redox.thioredoxin.PDIL		1.6708	0.0968833	0.0691188	0.910655	0.040547	0.0944011	1.08156	0.0831829	0.123965	1.03796	0.134048	0.0972541	1.10573	0.671396	0.617429	0.850342	0.658164	0.627901	0.943383	0.0398954	0.315244	1.79514	0.037491	0.036746
>generic|frv2_46551|franssen_28548_5	frv2_46551	franssen_28548_5 Short-chain alcohol dehydrogenase A (Fragment) n=3 Tax=Pisum sativum RepID=Q76KV8_PEA (UniRef100_Q76KV8 icov:96% qcovs:99.63% e-val:0)	misc.short chain dehydrogenase/reductase (SDR)		0.959827	0.826525	0.294147	0.736397	0.0110622	0.0446769	0.552159	0.0344758	0.0697808	1.55103	0.979784	0.352016	0.840061	0.337065	0.514318	0.858781	0.814875	0.677343	0.509153	0.046329	0.335707	0.532135	0.00555516	0.0135471	X
>generic|frv2_75219|Pisum_sativum_v2_Contig942_6	frv2_75219;Q38867	Pisum_sativum_v2_Contig942_6 Peptidyl-prolyl cis-trans isomerase n=1 Tax=Medicago truncatula RepID=B7FN74_MEDTR (UniRef100_B7FN74 icov:93% qcovs:90.53% e-val:1e-110)	cell.cycle.peptidylprolyl isomerase		1.11859	0.689069	0.261942	1.45469	0.0456719	0.103295	1.30412	0.0475391	0.0866435	1.14175	0.584209	0.25539	0.737037	0.307052	0.498824	0.861134	0.535731	0.613588	0.723433	0.978761	0.700644	1.53295	0.635155	0.180687
>generic|frv2_77608|Pisum_sativum_v2_Contig2580_6	frv2_77608;frv2_45187	Pisum_sativum_v2_Contig2580_6 Glyceraldehyde-3-phosphate dehydrogenase, cytosolic n=2 Tax=cellular organisms RepID=G3PC_PEA (UniRef100_P34922 icov:91% qcovs:100% e-val:0)	glycolysis.cytosolic branch.glyceraldehyde 3-phosphate dehydrogenase (GAP-DH)		0.946742	0.430636	0.186856	0.505209	0.0476885	0.105651	0.986636	0.0151025	0.0416614	1.27173	0.00477328	0.0145439	0.891341	0.432051	0.552428	0.876081	0.625081	0.626584	1.35134	0.971443	0.698429	1.29876	0.852866	0.224294
>generic|carvalho34166|PsCam049087_1_AA	Q9FN05;frv2_81319	PsCam049087_1_AA Probable glucan 1,3-alpha-glucosidase OS=Arabidopsis thaliana GN=PSL5 PE=1 SV=1 (sp	misc.gluco-, galacto- and mannosidases.alpha-galactosidase		1.3298	0.0907775	0.066463	1.56568	0.0334684	0.0817688	0.958695	0.0589386	0.101221	1.34142	0.485914	0.22391	1.11309	0.504944	0.568427	0.889284	0.884038	0.709344	1.17012	0.620353	0.604475	4.99243	0.403652	0.129578
>generic|frv2_111635|p.sativum_wa1_contig18563_5	frv2_111635;frv2_10396	p.sativum_wa1_contig18563_5 Stress-inducible protein, putative n=2 Tax=Medicago truncatula RepID=G7KG90_MEDTR (UniRef100_G7KG90 icov:94% qcovs:88.68% e-val:0)	stress		0.973961	0.788738	0.287367	0.528667	0.00165975	0.016423	1.25916	0.0645219	0.107755	0.769232	0.00763225	0.0188515	1.09963	0.416233	0.544356	0.961079	0.864467	0.698963	1.48616	0.426994	0.560593	1.71884	0.312387	0.109415
>generic|frv2_114219|p.sativum_wa1_contig20891_5	frv2_114219;Q9S7T8	p.sativum_wa1_contig20891_5 Serpin-ZX-like protein n=1 Tax=Medicago truncatula RepID=G7J5Q8_MEDTR (UniRef100_G7J5Q8 icov:98% qcovs:83.03% e-val:0)	protein.degradation.serine protease		0.958195	0.623399	0.243036	0.607058	0.0411239	0.0951843	0.588799	0.0797004	0.120623	0.751128	0.323796	0.16809	1.00686	0.948936	0.692627	1.01388	0.971265	0.720682	0.53388	0.329062	0.560593	0.965306	0.0995234	0.057751
>generic|frv2_115459|p.sativum_wa1_contig21919_6	frv2_115459;frv2_22566	p.sativum_wa1_contig21919_6 1-aminocyclopropane-1-carboxylate oxidase-like protein n=1 Tax=Medicago truncatula RepID=G8A030_MEDTR (UniRef100_G8A030 icov:88% qcovs:81.62% e-val:0)	hormone metabolism.ethylene.synthesis-degradation		1.00173	0.986945	0.33336	0.515114	0.0130919	0.0508009	0.906857	0.0172349	0.0449911	0.818065	0.974923	0.35122	0.96928	0.591542	0.601123	1.03692	0.920043	0.714859	0.896502	0.738863	0.637738	2.01072	0.701576	0.194598
>generic|frv2_100707|p.sativum_wa1_contig08794_4	frv2_100707	p.sativum_wa1_contig08794_4 Cupin family protein n=1 Tax=Medicago truncatula RepID=G7JT65_MEDTR (UniRef100_G7JT65 icov:95% qcovs:87.89% e-val:2e-119)	not assigned.unknown		0.892518	0.4393	0.189242	0.769591	0.049083	0.107271	1.0487	0.0746357	0.118009	1.05275	0.184708	0.113643	0.890803	0.105414	0.384541	1.13021	0.772312	0.669524	0.595906	0.394583	0.560593	1.34879	0.583493	0.17014	X
>generic|frv2_78131|Pisum_sativum_v2_Contig2890_6	frv2_78131;Q9SAK4;frv2_51385	Pisum_sativum_v2_Contig2890_6 PREDICTED: succinate-semialdehyde dehydrogenase, mitochondrial-like n=1 Tax=Cicer arietinum RepID=UPI00032A85F0 (UniRef100_UPI00032A85F0 icov:92% qcovs:92.64% e-val:0)	TCA / org transformation.other organic acid transformatons.misc		0.958186	0.100799	0.0710855	0.627432	0.0063996	0.0326772	0.681913	0.00433598	0.0189497	0.909871	0.00342369	0.0124998	0.871942	0.0641822	0.343571	1.30042	0.393742	0.594506	0.642662	0.0833755	0.408523	0.597389	0.155901	0.071589
>generic|frv2_85494|Pisum_sativum_v2_Contig6724_3	frv2_85494	Pisum_sativum_v2_Contig6724_3 Phenylcoumaran benzylic ether reductase-like protein Fi1 n=1 Tax=Medicago truncatula RepID=B7FHV0_MEDTR (UniRef100_B7FHV0 icov:99% qcovs:84.79% e-val:0)	secondary metabolism.flavonoids.isoflavones.isoflavone reductase		1.06456	0.362323	0.166393	0.524773	0.00255193	0.0190572	1.8348	0.000540174	0.00532064	1.20339	0.321137	0.16697	0.987323	0.915984	0.687193	1.30258	0.554056	0.618661	1.52921	0.110741	0.445075	5.47975	0.169826	0.0747459	X
>generic|frv2_81840|Pisum_sativum_v2_Contig4895_3	frv2_81840;frv2_46072	Pisum_sativum_v2_Contig4895_3 Glyceraldehyde-3-phosphate dehydrogenase A, chloroplastic n=1 Tax=Pisum sativum RepID=G3PA_PEA (UniRef100_P12858 icov:93% qcovs:99.75% e-val:0)	PS.calvin cycle.GAP		1.22205	0.121581	0.0796961	0.985556	0.00464498	0.0262636	0.800248	0.0309164	0.0654966	2.00145	0.0675033	0.0653854	0.999707	0.997946	0.703055	1.47471	0.0830562	0.593758	0.793712	0.663436	0.612619	1.2255	0.0149944	0.024413
>generic|frv2_80917|Pisum_sativum_v2_Contig4436_2	frv2_80917	Pisum_sativum_v2_Contig4436_2 PREDICTED: phosphoglycerate kinase, chloroplastic-like n=1 Tax=Cicer arietinum RepID=UPI00032AC101 (UniRef100_UPI00032AC101 icov:97% qcovs:94.58% e-val:0)	PS.calvin cycle.phosphoglycerate kinase		1.05362	0.588439	0.235354	0.940314	0.0172144	0.0572547	1.8297	0.01302	0.0383655	1.46837	0.0866954	0.0744277	1.16732	0.221819	0.474074	1.56196	0.183452	0.593758	2.1878	0.0688324	0.38153	1.80947	0.0202213	0.0276177	X
>generic|carvalho10429|PsCam007520_1_AA	Q9LUV2;frv2_45989;frv2_45992;frv2_75864;frv2_45994	PsCam007520_1_AA Probable protein Pop3 OS=Arabidopsis thaliana GN=At3g17210 PE=1 SV=1 (sp	stress.biotic.PR-proteins		1.20135	0.487421	0.202886	0.749402	0.0292935	0.0758765	4.96369	0.148588	0.176203	1.45448	0.0137526	0.0250669	1.06772	0.762729	0.641778	1.59419	0.36139	0.593758	1.89031	0.0724853	0.382482	1.84428	0.0978602	0.0574017
>generic|frv2_47909|franssen_29392_4	frv2_47909;frv2_112971;Q93WN0;frv2_47910	franssen_29392_4 Selenium-binding-like protein n=1 Tax=Medicago truncatula RepID=A0A072V0B0_MEDTR (UniRef100_A0A072V0B0 icov:98% qcovs:89.75% e-val:0)	metal handling		1.2006	0.141947	0.086744	1.97575	0.00893828	0.0402012	0.680705	0.000951439	0.00703186	0.940253	0.000492682	0.00639222	1.18764	0.241788	0.482083	2.85636	0.125131	0.593758	1.98136	0.112229	0.445075	4.22799	0.0938013	0.0565403
>generic|frv2_78767|Pisum_sativum_v2_Contig3279_6	frv2_78767;frv2_104191	Pisum_sativum_v2_Contig3279_6 Annexin n=1 Tax=Medicago truncatula RepID=O65848_MEDTR (UniRef100_O65848 icov:93% qcovs:88.18% e-val:0)	cell.organisation		1.14287	0.181261	0.100372	0.0699267	0.660325	0.34243	1.20168	0.319705	0.255224	1.23646	0.0460302	0.0525533	0.837215	0.0111408	0.186364	1.41669	0.517771	0.608018	0.891949	0.309621	0.560593	0.788757	0.139818	0.0690161
>generic|frv2_47354|franssen_29030_5	frv2_47354;frv2_82275;frv2_112671;O23254	franssen_29030_5 PREDICTED: serine hydroxymethyltransferase 1-like n=1 Tax=Cicer arietinum RepID=UPI00032A84CA (UniRef100_UPI00032A84CA icov:95% qcovs:97.66% e-val:0)	C1-metabolism.glycine hydroxymethyltransferase		0.975162	0.751989	0.278274	0.137599	0.296302	0.27021	3.03358	0.109058	0.147802	1.35692	0.0134046	0.0247405	1.316	0.0206589	0.23317	1.63651	0.165587	0.593758	1.1107	0.55355	0.587976	1.02665	0.141279	0.0690919
>generic|frv2_74591|Pisum_sativum_v2_Contig477_6	frv2_74591	Pisum_sativum_v2_Contig477_6 Vicilin n=1 Tax=Vicia narbonensis RepID=Q41677_VICNA (UniRef100_Q41677 icov:100% qcovs:78.85% e-val:1e-72)	not assigned.unknown		0.925357	0.15727	0.0913748	0.17467	0.277225	0.263759	1.68162	0.818186	0.372648	0.905883	0.0786139	0.0698357	0.712766	0.00210385	0.0859285	0.682699	0.348175	0.593758	1.16441	0.838563	0.672402	2.16573	0.737727	0.202936	X
>generic|frv2_69711|franssen_43033_4	frv2_69711;frv2_38129;frv2_42476;frv2_38476	franssen_43033_4 ABA-responsive protein ABR17 n=1 Tax=Pisum sativum RepID=ABR17_PEA (UniRef100_Q06931 icov:92% qcovs:100% e-val:1e-79)	not assigned.unknown		0.825973	0.234202	0.118456	0.175989	0.0961841	0.153504	5.39042	0.9189	0.394063	0.615232	0.177568	0.111285	0.663485	0.0412729	0.306298	0.306179	0.328901	0.593758	1.4993	0.0292703	0.290179	1.08886	0.00209168	0.00768545
>generic|frv2_77033|Pisum_sativum_v2_Contig2233_2	frv2_77033	Pisum_sativum_v2_Contig2233_2 Import receptor subunit TOM40-like protein n=1 Tax=Medicago truncatula RepID=G7LBI9_MEDTR (UniRef100_G7LBI9 icov:94% qcovs:89.32% e-val:0)	protein.targeting.mitochondria		1.16142	0.593735	0.23624	0.310971	0.681249	0.344163	2.92915	0.51519	0.296638	1.43341	0.165552	0.107848	1.39671	0.0150977	0.203936	0.869058	0.744336	0.662397	1.10678	0.434555	0.560593	1.02351	0.539211	0.161882	X
>generic|frv2_78060|Pisum_sativum_v2_Contig2841_1	frv2_78060;frv2_46008	Pisum_sativum_v2_Contig2841_1 PsHSC71.0 n=1 Tax=Pisum sativum RepID=Q41027_PEA (UniRef100_Q41027 icov:99% qcovs:99.38% e-val:0)	stress.abiotic.heat		0.903338	0.476242	0.200134	0.326854	0.0804958	0.141598	1.21036	0.0304512	0.0650786	0.824265	0.00220641	0.0111345	1.88879	0.000861999	0.0521075	0.949007	0.917422	0.714859	1.06214	0.289207	0.560593	0.762967	0.861315	0.226261
>generic|frv2_48833|franssen_30008_1	frv2_48833	franssen_30008_1 PREDICTED: GTP-binding protein SAR1A-like n=1 Tax=Cicer arietinum RepID=UPI00032A86C1 (UniRef100_UPI00032A86C1 icov:87% qcovs:94.27% e-val:9e-132)	signalling.G-proteins		0.961669	0.286559	0.139096	0.363066	0.582249	0.329902	0.799445	0.876203	0.385529	0.874936	0.00222705	0.0111345	1.12126	0.0315107	0.26383	0.767633	0.617602	0.622916	1.00541	0.351327	0.560593	2.02538	0.74091	0.203094	X
>generic|frv2_96605|p.sativum_wa1_contig04311_5	frv2_96605;frv2_68909	p.sativum_wa1_contig04311_5 Tubulin beta-1 chain n=1 Tax=Medicago truncatula RepID=A0A072USS0_MEDTR (UniRef100_A0A072USS0 icov:92% qcovs:99.03% e-val:0)	cell.organisation.cytoskeleton.mikrotubuli		1.19103	0.0871081	0.0645698	0.397212	0.602686	0.334088	1.59878	0.0711757	0.114873	0.772722	0.0291567	0.0381376	1.3889	0.0119853	0.186364	0.966414	0.924377	0.715624	0.897845	0.176636	0.499043	1.67307	0.05881	0.0450874
>generic|frv2_104986|p.sativum_wa1_contig12925_6	frv2_104986;frv2_79019	p.sativum_wa1_contig12925_6 hypothetical protein MTR_3g096890 n=1 Tax=Medicago truncatula RepID=UPI0002362F8D (UniRef100_UPI0002362F8D icov:92% qcovs:79.24% e-val:1e-157)	not assigned.unknown		0.924301	0.544473	0.221524	0.501489	0.146023	0.195896	10.1303	0.107264	0.145879	2.54285	0.814042	0.312921	0.525985	0.0375141	0.288229	0.384659	0.257068	0.593758	1.93883	0.0276362	0.286533	18.633	0.0572732	0.0563438
>generic|frv2_60371|franssen_37520_1	frv2_60371;frv2_85500	franssen_37520_1 Putative cysteine protease (Fragment) n=1 Tax=Pisum sativum RepID=Q9SC34_PEA (UniRef100_Q9SC34 icov:93% qcovs:99.27% e-val:0)	signalling.calcium		1.38949	0.287014	0.139096	1.14578	0.0690395	0.128561	0.457892	0.170481	0.187019	0.929811	0.893468	0.332785	1.75766	0.0295871	0.25256	0.399948	0.249202	0.593758	1.40235	0.152071	0.48784	0.814941	0.992602	0.250319
>generic|frv2_112184|p.sativum_wa1_contig19088_6	frv2_112184	p.sativum_wa1_contig19088_6 PREDICTED: cell division cycle protein 48 homolog n=1 Tax=Cicer arietinum RepID=UPI00032A6594 (UniRef100_UPI00032A6594 icov:100% qcovs:97.16% e-val:0)	cell.division		0.956823	0.842235	0.298476	1.39195	0.659627	0.34243	0.519197	0.459134	0.281549	0.809759	0.147817	0.10105	1.54903	0.0474859	0.3073	0.418924	0.373901	0.593758	1.67897	0.865288	0.678043	1.78404	0.00112606	0.00596992	X
>generic|frv2_86433|Pisum_sativum_v2_Contig7193_1	frv2_86433;frv2_46565	Pisum_sativum_v2_Contig7193_1 PREDICTED: uncharacterized protein At2g37660, chloroplastic-like n=1 Tax=Cicer arietinum RepID=UPI00032A9700 (UniRef100_UPI00032A9700 icov:80% qcovs:90.68% e-val:1e-155)	protein.degradation		0.987825	0.981787	0.332067	1.7485	0.266714	0.256845	0.503215	0.0730186	0.117223	0.765955	0.0124306	0.0239402	1.31586	0.0254341	0.249253	0.439225	0.273958	0.593758	1.82277	0.33974	0.560593	1.37224	0.157149	0.071879
>generic|frv2_74604|Pisum_sativum_v2_Contig484_5	frv2_74604	Pisum_sativum_v2_Contig484_5 Vicilin n=1 Tax=Pisum sativum RepID=VCLC_PEA (UniRef100_P13918 icov:100% qcovs:97.41% e-val:4e-70)	not assigned.unknown		0.804476	0.0540312	0.0480442	1.59077	0.674042	0.34309	2.67716	0.91519	0.393774	0.874981	0.215852	0.125117	0.776178	0.0371478	0.288229	0.56103	0.289148	0.593758	1.728	0.955018	0.698101	2.84652	0.195172	0.080456	X
>generic|frv2_96771|p.sativum_wa1_contig04560_5	frv2_96771	p.sativum_wa1_contig04560_5 Heat shock cognate 70 kDa protein n=1 Tax=Medicago truncatula RepID=G7KWU8_MEDTR (UniRef100_G7KWU8 icov:98% qcovs:96.91% e-val:0)	stress.abiotic.heat		0.914927	0.329226	0.154667	1.85589	0.988641	0.420749	0.474779	0.949079	0.402566	0.718278	0.241523	0.135546	1.25721	0.0187158	0.226348	0.736604	0.501435	0.606728	0.453355	0.922337	0.691797	1.0709	0.146354	0.0701214	X
>generic|frv2_87009|Pisum_sativum_v2_Contig7478_1	frv2_87009;frv2_47024	Pisum_sativum_v2_Contig7478_1 Flavoprotein wrbA n=1 Tax=Glycine soja RepID=A0A0B2SG96_GLYSO (UniRef100_A0A0B2SG96 icov:90% qcovs:95.57% e-val:9e-137)	lipid metabolism.exotics(steroids, squalene etc)		0.96035	0.592659	0.23624	1.86818	0.123223	0.18076	1.53524	0.00871334	0.0305328	1.61758	0.00799662	0.0188515	1.26526	0.0237944	0.243399	0.751799	0.664969	0.628423	2.79626	0.712095	0.630488	1.816	0.392801	0.128151
>generic|frv2_80251|Pisum_sativum_v2_Contig4090_4	frv2_80251	Pisum_sativum_v2_Contig4090_4 Multi-copper oxidase-like protein n=1 Tax=Medicago truncatula RepID=A0A072VDP0_MEDTR (UniRef100_A0A072VDP0 icov:98% qcovs:92.65% e-val:0)	cell wall.pectin*esterases.PME		0.952084	0.705834	0.265356	0.690176	0.224143	0.238173	1.02303	0.101135	0.141433	0.709668	0.238212	0.134597	1.32634	0.048321	0.3073	0.930994	0.68055	0.632535	0.901658	0.0717218	0.38153	1.66559	0.0738251	0.0496289	X
>generic|frv2_99006|p.sativum_wa1_contig07214_4	frv2_99006;frv2_99005;frv2_99003;frv2_53258;Q07353;Q05965	p.sativum_wa1_contig07214_4 Flavanone-3-hydroxylase n=1 Tax=Medicago truncatula RepID=D2DFB1_MEDTR (UniRef100_D2DFB1 icov:96% qcovs:93.15% e-val:0)	secondary metabolism.flavonoids.dihydroflavonols.flavanone 3-hydroxylase		0.630103	0.122167	0.0799094	1.671	0.449779	0.302738	0.90424	0.415068	0.275358	0.920925	0.660183	0.274943	1.4882	0.0109965	0.186364	1	nan	nan	0.788817	0.00323011	0.111236	0.551853	6.6996e-07	3.90705e-05
>generic|frv2_111135|p.sativum_wa1_contig18072_5	frv2_111135	p.sativum_wa1_contig18072_5 Archaeal/vacuolar-type H+-ATPase subunit A n=1 Tax=Medicago truncatula RepID=A0A072URM9_MEDTR (UniRef100_A0A072URM9 icov:97% qcovs:98.88% e-val:0)	transport.p- and v-ATPases		0.889737	0.125921	0.0808136	0.781876	0.0841614	0.144828	2.30821	0.286256	0.245887	1.09731	0.5547	0.246052	1.30169	0.0238527	0.243399	1.08944	0.706164	0.645201	1.16276	0.292356	0.560593	1.16756	0.24998	0.0942201	X
>generic|frv2_46046|franssen_28258_4	frv2_46046;frv2_114568	franssen_28258_4 Pyridoxal biosynthesis protein PDX1, putative n=1 Tax=Medicago truncatula RepID=Q45FF2_MEDTR (UniRef100_Q45FF2 icov:94% qcovs:96.18% e-val:0)	Co-factor and vitamine metabolism		0.751793	0.168021	0.0954523	1.00992	0.410232	0.298468	1.04229	0.150945	0.178454	1.0703	0.0217369	0.0331276	1.47796	0.00584387	0.146787	1.09834	0.926429	0.715624	0.415346	0.140208	0.482694	0.381119	0.0882141	0.0549526
>generic|frv2_83550|Pisum_sativum_v2_Contig5748_6	frv2_83550;Q9LZG0	Pisum_sativum_v2_Contig5748_6 PfkB family carbohydrate kinase n=2 Tax=Medicago truncatula RepID=G7IAA1_MEDTR (UniRef100_G7IAA1 icov:91% qcovs:92.08% e-val:0)	nucleotide metabolism.salvage.nucleoside kinases.adenosine kinase		1.07939	0.422663	0.184702	1.56506	0.144812	0.195896	1.12957	0.0752935	0.118567	1.26816	0.00498858	0.0147795	1.92221	0.0104635	0.186364	1.11753	0.781626	0.673028	1.84104	0.0602897	0.372152	2.22911	0.222329	0.0873111
>generic|frv2_48686|franssen_29907_2	frv2_48686;P50246;frv2_79191	franssen_29907_2 Adenosylhomocysteinase n=1 Tax=Medicago truncatula RepID=Q84RD9_MEDTR (UniRef100_Q84RD9 icov:99% qcovs:97.11% e-val:0)	amino acid metabolism.degradation.aspartate family.methionine		0.904804	0.304617	0.145548	1.60635	0.858681	0.387967	1.06366	0.677723	0.337893	0.999814	0.487793	0.223978	1.22935	0.0117877	0.186364	1.14829	0.766783	0.667358	0.859289	0.515217	0.575265	0.506606	0.537414	0.161785
>generic|carvalho34143|PsCam049063_1_AA	Q8GVE8	PsCam049063_1_AA Phosphoenolpyruvate carboxylase 4 OS=Arabidopsis thaliana GN=PPC4 PE=2 SV=1 (sp	glycolysis.cytosolic branch.phospho-enol-pyruvate carboxylase (PEPC)		1.00194	0.990759	0.33336	0.854534	0.773606	0.366768	0.479483	0.716776	0.346332	0.770193	0.796176	0.308658	0.821529	0.00814526	0.162328	1.17696	0.783129	0.673028	0.829629	0.881989	0.68376	1.07346	0.569955	0.168026	X
>generic|frv2_113077|p.sativum_wa1_contig19891_6	frv2_113077	p.sativum_wa1_contig19891_6 PREDICTED: ATP-citrate synthase alpha chain protein 2-like n=1 Tax=Cicer arietinum RepID=UPI00032A6291 (UniRef100_UPI00032A6291 icov:99% qcovs:97.64% e-val:0)	TCA / org transformation.other organic acid transformatons.atp-citrate lyase		1.21467	0.44368	0.18983	0.708732	0.140327	0.194002	1.42998	0.163858	0.185744	0.822937	0.424122	0.20304	1.54036	0.0463146	0.3073	1.25579	0.716042	0.652421	1.28353	0.296306	0.560593	1.35388	0.022837	0.0284877	X
>generic|frv2_75362|Pisum_sativum_v2_Contig1049_4	frv2_75362	Pisum_sativum_v2_Contig1049_4 Legumin J n=1 Tax=Pisum sativum RepID=LEGJ_PEA (UniRef100_P05692 icov:97% qcovs:92.05% e-val:0)	development.storage proteins		0.987683	0.79313	0.288282	1.08527	0.634284	0.338541	4.62494	0.447224	0.281055	0.996543	6.08263e-05	0.00234893	0.825362	0.0142594	0.198137	1.26249	0.0976474	0.593758	1.57622	0.000586022	0.061254	1.34648	0.446511	0.139809	X
>generic|frv2_41380|franssen_25244_4	frv2_41380;frv2_41200;frv2_33430	franssen_25244_4 40S ribosomal protein S8 n=1 Tax=Lotus japonicus RepID=I3SIQ8_LOTJA (UniRef100_I3SIQ8 icov:83% qcovs:91.67% e-val:1e-132)	protein.synthesis.ribosomal protein.eukaryotic.40S subunit.S8		0.994109	0.941217	0.321536	0.716785	0.611386	0.336553	0.935469	0.669561	0.335608	0.925368	0.0187769	0.0307311	1.43832	0.0434063	0.3073	1.32008	0.46946	0.602515	1.06154	0.323188	0.560593	1.41137	0.403836	0.129578
>generic|frv2_96465|p.sativum_wa1_contig04081_5	frv2_96465;P46293;frv2_95597;P62931;frv2_7	p.sativum_wa1_contig04081_5 PREDICTED: 40S ribosomal protein S16-like n=1 Tax=Cicer arietinum RepID=UPI00032A7694 (UniRef100_UPI00032A7694 icov:78% qcovs:98.59% e-val:7e-42)	protein.synthesis.ribosomal protein.eukaryotic.40S subunit.S16		0.841321	0.397993	0.175927	0.682941	0.205771	0.231123	1.13687	0.106593	0.145879	1.41602	0.0874653	0.0747026	1.60116	0.0119324	0.186364	1.51721	0.634051	0.627871	1.45144	0.0415606	0.316203	2.35886	0.254903	0.0952905
>generic|frv2_86272|Pisum_sativum_v2_Contig7113_5	frv2_86272;frv2_55534	Pisum_sativum_v2_Contig7113_5 PREDICTED: REF/SRPP-like protein At1g67360-like n=1 Tax=Cicer arietinum RepID=UPI00032ACB59 (UniRef100_UPI00032ACB59 icov:96% qcovs:82.86% e-val:1e-121)	not assigned.no ontology		1.05205	0.904849	0.312593	2.00874	0.468838	0.302738	0.251948	0.517413	0.296638	0.918122	0.064087	0.0632956	0.556196	0.048276	0.3073	0.653672	0.373901	0.593758	3.53248	0.0541676	0.30986	1.91654	0.0275578	0.0310534
>generic|frv2_75363|Pisum_sativum_v2_Contig1050_6	frv2_75363	Pisum_sativum_v2_Contig1050_6 Legumin (Minor small) n=1 Tax=Pisum sativum RepID=O24294_PEA (UniRef100_O24294 icov:98% qcovs:88.95% e-val:0)	development.storage proteins		0.918649	0.21778	0.113814	2.26862	0.729561	0.354355	0.351037	0.812182	0.37253	0.552241	0.200585	0.120076	0.696642	0.000584182	0.0485791	0.457116	0.325262	0.593758	0.57979	0.876804	0.682485	0.747577	0.221574	0.0871614	X
>generic|frv2_82010|Pisum_sativum_v2_Contig4981_1	frv2_82010;Q9FNN5	Pisum_sativum_v2_Contig4981_1 NADH-ubiquinone oxidoreductase 51 kDa subunit n=2 Tax=Medicago truncatula RepID=G7I3R9_MEDTR (UniRef100_G7I3R9 icov:96% qcovs:96.48% e-val:0)	mitochondrial electron transport / ATP synthesis.NADH-DH.localisation not clear		0.956348	0.90374	0.312562	2.28012	0.181171	0.220634	0.461243	0.218738	0.21594	1.08736	0.183339	0.11322	1.29767	0.0456303	0.3073	1.4067	0.528682	0.613588	0.820251	0.2745	0.560593	2.17522	0.0700848	0.0486569
>generic|frv2_50443|franssen_31118_1	frv2_50443;frv2_81728	franssen_31118_1 Adenylosuccinate synthetase, chloroplastic n=1 Tax=Medicago truncatula RepID=G7KTL4_MEDTR (UniRef100_G7KTL4 icov:96% qcovs:94.46% e-val:0)	nucleotide metabolism.synthesis.purine.adenylosuccinate synthase		1.22937	0.361153	0.166104	2.30196	0.142971	0.195802	0.0594282	0.146813	0.17463	0.378519	0.266805	0.145316	1.67975	0.0130326	0.197828	1.31643	0.695617	0.637328	0.0746825	0.558025	0.588905	1.14414	0.680063	0.190672
>generic|carvalho31460|PsCam045169_1_AA	P93263;frv2_80305	PsCam045169_1_AA 5-methyltetrahydropteroyltriglutamate--homocysteine methyltransferase OS=Mesembryanthemum crystallinum GN=METE PE=2 SV=1 (sp	amino acid metabolism.synthesis.aspartate family.methionine		0.962817	0.568083	0.227806	2.33627	0.679764	0.344048	1.01823	0.555619	0.305245	0.881478	0.387933	0.191848	1.34792	0.0426224	0.3073	1.38226	0.304168	0.593758	1.19433	0.288117	0.560593	1.51734	0.00552014	0.0135471
>generic|frv2_81858|Pisum_sativum_v2_Contig4904_3	frv2_81858;frv2_55723	Pisum_sativum_v2_Contig4904_3 PREDICTED: pheophorbide a oxygenase, chloroplastic-like n=1 Tax=Cicer arietinum RepID=UPI00032AB1D4 (UniRef100_UPI00032AB1D4 icov:96% qcovs:88.81% e-val:0)	cell.cell death.plants		1.11875	0.453782	0.193067	3.17712	0.323938	0.278118	0.637958	0.367392	0.262513	0.745365	0.510917	0.23104	0.840269	0.0350471	0.282572	0.71138	0.488076	0.606728	1.56565	0.420337	0.560593	1.61905	0.24539	0.0935332
>generic|frv2_85107|Pisum_sativum_v2_Contig6529_3	frv2_85107;frv2_2377	Pisum_sativum_v2_Contig6529_3 PREDICTED: 4-hydroxy-tetrahydrodipicolinate reductase 2, chloroplastic-like isoform X2 n=1 Tax=Cicer arietinum RepID=UPI00032A5174 (UniRef100_UPI00032A5174 icov:97% qcovs:87.21% e-val:0)	amino acid metabolism.synthesis.aspartate family.lysine.dihydrodipicolinate reductase		1.31923	0.0833427	0.0634018	6.15052	0.358298	0.286797	0.189522	0.51651	0.296638	1.93394	0.00781698	0.0188515	0.550274	0.0213195	0.23317	1.9328	0.373901	0.593758	0.961452	1.86745e-05	0.00610945	2.36245	0.8669	0.227031
>generic|frv2_82295|Pisum_sativum_v2_Contig5123_1	frv2_82295;frv2_59184	Pisum_sativum_v2_Contig5123_1 26S proteasome non-ATPase regulatory subunit 5 n=2 Tax=Medicago truncatula RepID=G7LDS0_MEDTR (UniRef100_G7LDS0 icov:98% qcovs:89.16% e-val:0)	protein.degradation.ubiquitin.proteasom		1.09074	0.51001	0.210292	0.538646	0.314481	0.274241	2.21269	0.183755		1.1083	0.33236		0.917002	0.236931		1.8137	0.0539191		1.96304	0.0362035		2.95323	0.695231
>generic|frv2_113361|p.sativum_wa1_contig20158_6	frv2_113361;Q9LVI9	p.sativum_wa1_contig20158_6 PREDICTED: NAD-dependent dihydropyrimidine dehydrogenase subunit PreA-like n=1 Tax=Cicer arietinum RepID=UPI00032A6214 (UniRef100_UPI00032A6214 icov:97% qcovs:91.55% e-val:0)	nucleotide metabolism.degradation.pyrimidine.dihydrouracil dehydrogenase		1.24378	0.0615417	0.052209	1.44252	0.617943	0.33776	0.466768	0.419244		0.892932	0.00933914		0.893264	0.0805619		0.388708	0.0587418		0.829356	0.273235		2.75323	0.12526
>generic|frv2_86901|Pisum_sativum_v2_Contig7424_3	frv2_86901;Q9M2Z4;frv2_33404;frv2_40948	Pisum_sativum_v2_Contig7424_3 Cytochrome b5-like heme/steroid-binding domain protein n=1 Tax=Medicago truncatula RepID=A0A072VQL5_MEDTR (UniRef100_A0A072VQL5 icov:99% qcovs:80.18% e-val:3e-117)	redox.ascorbate and glutathione		0.970589	0.890505	0.30918	0.138149	0.116828	0.17449	0.00442748	0.259702		0.0877377	0.922385		1.0124	0.953547		0.318404	0.0622965		0.0418599	0.761951		0.413374	0.00771655
>generic|frv2_86680|Pisum_sativum_v2_Contig7315_6	frv2_86680	Pisum_sativum_v2_Contig7315_6 Lectin n=2 Tax=Pisum sativum RepID=LEC_PEA (UniRef100_P02867 icov:92% qcovs:99.64% e-val:0)	signalling.receptor kinases.legume-lectin		1.05394	0.50211	0.208256	1.00806	0.130258	0.187075	0.541928	0.307208		0.993539	0.00610282		0.886552	0.185191		0.492995	0.0733377		0.378298	0.51758		0.553294	0.167636		X
>generic|frv2_118375|p.sativum_wa1_contig24158_4	frv2_118375;frv2_53517	p.sativum_wa1_contig24158_4 Uncharacterized protein n=1 Tax=Glycine max RepID=K7MVK8_SOYBN (UniRef100_K7MVK8 icov:91% qcovs:79.58% e-val:1e-171)	not assigned.unknown		1.02233	0.76828	0.281922	0.569227	0.816488	0.376643	0.682775	0.297359		1.14192	0.0822726		1.03319	0.606853		1.29572	0.0757627		0.451177	0.00191043		0.249733	0.632062
>generic|frv2_77904|Pisum_sativum_v2_Contig2752_3	frv2_77904	Pisum_sativum_v2_Contig2752_3 PREDICTED: 60S ribosomal protein L18-like n=1 Tax=Cicer arietinum RepID=UPI00032AB746 (UniRef100_UPI00032AB746 icov:97% qcovs:96.26% e-val:8e-125)	protein.synthesis.ribosomal protein.eukaryotic.60S subunit.L18		0.95459	0.817587	0.292213	1.02235	0.915027	0.399736	2.04278	0.33399		0.930959	0.167576		1.42792	0.155045		2.56463	0.0790806		1.46603	0.396013		2.00199	0.444312		X
>generic|frv2_51012|franssen_31514_5	frv2_51012;frv2_117424	franssen_31514_5 Epoxide hydrolase n=2 Tax=Medicago truncatula RepID=A2Q324_MEDTR (UniRef100_A2Q324 icov:100% qcovs:93.31% e-val:0)	misc.misc2		1.48557	0.433322	0.186963	3.28398	0.377631	0.287731	0.113723	0.350675		0.326298	0.120334		0.561065	0.350279		0.500807	0.079582		0.659985	0.96244		0.55189	0.825353
>generic|frv2_48143|franssen_29532_5	frv2_48143;frv2_78353	franssen_29532_5 2,3-bisphosphoglycerate-independent phosphoglycerate mutase n=2 Tax=Medicago truncatula RepID=B7FLD9_MEDTR (UniRef100_B7FLD9 icov:99% qcovs:93.88% e-val:0)	glycolysis.cytosolic branch.phosphoglycerate mutase		0.901297	0.209991	0.111068	0.382325	0.508036	0.307869	3.49936	0.980499		1.27562	0.346162		1.04849	0.768141		0.568796	0.0895244		1.18104	0.636828		1.49292	0.0955304
>generic|frv2_73952|Pisum_sativum_v2_Contig115_6	frv2_73952;frv2_42678	Pisum_sativum_v2_Contig115_6 Triosephosphate isomerase n=1 Tax=Medicago truncatula RepID=I3S3S0_MEDTR (UniRef100_I3S3S0 icov:97% qcovs:97.21% e-val:3e-177)	glycolysis.cytosolic branch.triosephosphate isomerase (TPI)		0.936323	0.221413	0.11493	0.015164	0.305366	0.272049	1.1244	0.873803		0.739255	0.00273184		1.03875	0.656592		0.520188	0.0916217		1.83933	0.505175		2.00906	0.0550298
>generic|frv2_80970|Pisum_sativum_v2_Contig4463_1	frv2_80970	Pisum_sativum_v2_Contig4463_1 Uncharacterized protein n=2 Tax=Medicago truncatula RepID=G7KGF6_MEDTR (UniRef100_G7KGF6 icov:99% qcovs:89.45% e-val:0)	protein.degradation		0.848105	0.125613	0.0807849	0.903638	0.391955	0.293257	0.422814	0.0685477		0.783059	0.160249		0.98885	0.957691		0.645538	0.0917413		0.999804	0.32012		0.581536	0.314711		X
>generic|frv2_113609|p.sativum_wa1_contig20362_4	frv2_113609	p.sativum_wa1_contig20362_4 Translation elongation factor EF1B, gamma chain n=1 Tax=Medicago truncatula RepID=A0A072UXB1_MEDTR (UniRef100_A0A072UXB1 icov:95% qcovs:84.96% e-val:0)	protein.synthesis.elongation		0.796222	0.185048	0.101734	0.670243	0.0523352	0.11018	1.53966	0.129431		0.953808	0.576262		1.00697	0.919044		1.70598	0.0994096		1.06156	0.0284646		1.02277	0.725434		X
>generic|frv2_49864|franssen_30707_1	frv2_49864;frv2_75716	franssen_30707_1 Peptidyl-prolyl cis-trans isomerase n=1 Tax=Phaseolus vulgaris RepID=V7BP04_PHAVU (UniRef100_V7BP04 icov:93% qcovs:92% e-val:4e-131)	cell.cycle.peptidylprolyl isomerase		0.783744	0.159955	0.0922363	0.947541	0.210651	0.234197	4.83073	0.2517		1.16983	0.232528		0.996334	0.980011		0.312602	0.101676		1.73929	0.574975		2.77934	0.0474356
>generic|frv2_94803|CD859877_6	frv2_94803	CD859877_6 Convicilin n=1 Tax=Pisum sativum RepID=CVCA_PEA (UniRef100_P13915 icov:97% qcovs:98% e-val:9e-134)	development.storage proteins		1.0464	0.345279	0.159762	0.925553	0.197868	0.228319	0.42705	0.242165		0.635439	0.164937		0.921921	0.473527		0.498452	0.103906		0.461752	0.48376		0.312269	0.0164795		X
>generic|frv2_82402|Pisum_sativum_v2_Contig5175_6	frv2_82402;frv2_54765	Pisum_sativum_v2_Contig5175_6 Carboxypeptidase n=1 Tax=Medicago truncatula RepID=A0A072VPZ7_MEDTR (UniRef100_A0A072VPZ7 icov:94% qcovs:86.4% e-val:0)	protein.degradation		0.87633	0.13511	0.0844501	1.03874	0.095113	0.153504	0.648075	0.02244		1.55061	0.171061		1.06648	0.512161		0.59105	0.104463		0.177375	0.177769		0.284708	0.209669
>generic|frv2_137453|p.sativum_wa1_contig36084_6	frv2_137453	p.sativum_wa1_contig36084_6 PREDICTED: embryonic protein DC-8-like n=1 Tax=Cicer arietinum RepID=UPI00032A5449 (UniRef100_UPI00032A5449 icov:98% qcovs:52.94% e-val:2e-36)	not assigned.unknown		1.05953	0.764693	0.281391	0.986304	0.853116	0.387154	0.328576	0.0556518		1.09828	0.0526023		1.09055	0.527346		0.0552219	0.109867		0.362291	0.941844		0.431768	0.000644281		X
>generic|frv2_81978|Pisum_sativum_v2_Contig4965_3	frv2_81978	Pisum_sativum_v2_Contig4965_3 Glutamine synthetase n=1 Tax=Pisum sativum RepID=A1IVX1_PEA (UniRef100_A1IVX1 icov:93% qcovs:99.72% e-val:0)	N-metabolism.ammonia metabolism.glutamine synthetase		0.948634	0.522386	0.214529	1.29502	0.542415	0.317689	0.711581	0.395085		0.774909	0.947458		0.777898	0.190211		0.35878	0.111257		1.0936	0.429874		1.82631	0.220633		X
>generic|frv2_98541|p.sativum_wa1_contig06712_5	frv2_98541;frv2_47281;frv2_76636;Q9UJF2	p.sativum_wa1_contig06712_5 Plant/T7N9-9 protein n=1 Tax=Medicago truncatula RepID=G7K9S8_MEDTR (UniRef100_G7K9S8 icov:99% qcovs:85.2% e-val:0)	not assigned.unknown		0.946363	0.878076	0.307059	2.35598	0.320964	0.276765	0.553668	0.265854		1	0.415662		0.87557	0.489575		0.336491	0.116118		1.64049	0.999351		1.2529	0.024039
>generic|frv2_47468|franssen_29106_3	frv2_47468;Q9ZSK3;frv2_3708;frv2_47473	franssen_29106_3 PREDICTED: actin-depolymerizing factor 2-like n=1 Tax=Cicer arietinum RepID=UPI00032AC77E (UniRef100_UPI00032AC77E icov:99% qcovs:92.09% e-val:1e-92)	cell.organisation.cytoskeleton.actin.actin depolymerizing factors		0.933587	0.525086	0.21535	1.39379	0.632166	0.338541	1.16422	0.748302		0.960535	0.568402		1.24177	0.0708059		0.537494	0.11704		0.379638	0.0886879		2.76512	0.280795
>generic|frv2_83932|Pisum_sativum_v2_Contig5937_2	frv2_83932;frv2_64746	Pisum_sativum_v2_Contig5937_2 PREDICTED: chaperone protein dnaJ 10-like isoform X1 n=1 Tax=Cicer arietinum RepID=UPI00032A6363 (UniRef100_UPI00032A6363 icov:99% qcovs:89.09% e-val:0)	stress.abiotic.heat		1.43951	0.305545	0.145548	3.00317	0.509185	0.307869	0.076707	0.56007		0.811824	0.547505		1.51869	0.349857		0.464935	0.117541		0.888309	0.371011		1.82941	0.135079
>generic|frv2_100427|p.sativum_wa1_contig08553_4	frv2_100427;frv2_48743	p.sativum_wa1_contig08553_4 PREDICTED: ankyrin repeat domain-containing protein 2-like n=1 Tax=Cicer arietinum RepID=UPI00032A7E1B (UniRef100_UPI00032A7E1B icov:99% qcovs:91.07% e-val:0)	RNA.regulation of transcription.AtSR Transcription Factor family		0.890691	0.101961	0.0717402	1.6949	0.798145	0.373404	0.260027	0.603091		0.594326	0.406073		1.15913	0.287834		0.225162	0.118993		0.614838	0.445573		0.773434	0.00203987
>generic|frv2_89921|Pisum_sativum_v1_Contig692_2	frv2_89921;frv2_47833;frv2_95970;frv2_4172;frv2_30622	Pisum_sativum_v1_Contig692_2 60S ribosomal protein L27a-3 n=2 Tax=Medicago truncatula RepID=G7JYX5_MEDTR (UniRef100_G7JYX5 icov:100% qcovs:93.01% e-val:5e-90)	protein.synthesis.ribosomal protein.eukaryotic.60S subunit.L27A		1.08234	0.418965	0.18361	1.53916	0.069351	0.128561	1.16374	0.181246		0.868563	0.809601		1.2128	0.271029		2.0216	0.11947		1.39526	0.375159		2.27696	0.425629
>generic|frv2_55445|franssen_34476_5	frv2_55445;frv2_119487;O64700	franssen_34476_5 Uncharacterized protein n=1 Tax=Medicago truncatula RepID=G7JDZ5_MEDTR (UniRef100_G7JDZ5 icov:89% qcovs:98.38% e-val:3e-177)	amino acid metabolism.degradation.glutamate family.arginine		1	nan	nan	3.46399	0.373901	0.286797	0.383818	0.373901		0.75	0		1.5328	0.263152		0.108722	0.119608		1.89641	0.435822		1.56743	1.78013e-06
>generic|frv2_80221|Pisum_sativum_v2_Contig4074_4	frv2_80221	Pisum_sativum_v2_Contig4074_4 Heat shock 70 kDa protein n=1 Tax=Medicago truncatula RepID=G7II48_MEDTR (UniRef100_G7II48 icov:99% qcovs:87.63% e-val:0)	stress.abiotic.heat		1.18653	0.151513	0.0900454	0.887094	0.860991	0.388125	0.537484	0.636943		0.94643	0.900235		0.930985	0.493195		0.398532	0.120139		1.19811	0.401139		1.94867	0.00902996		X
>generic|frv2_111040|p.sativum_wa1_contig17963_6	frv2_111040;Q8L6Y1;frv2_27645	p.sativum_wa1_contig17963_6 Ubiquitin carboxyl-terminal hydrolase n=2 Tax=Medicago truncatula RepID=G7IR70_MEDTR (UniRef100_G7IR70 icov:97% qcovs:94.03% e-val:0)	protein.degradation.ubiquitin.ubiquitin protease		0.80509	0.555157	0.224383	1.89721	0.551257	0.320386	0.722104	0.523026		0.742062	0.377172		1.06308	0.79963		0.309235	0.121705		0.917492	0.826976		0.764074	0.000114315
>generic|frv2_48598|franssen_29847_3	frv2_48598;frv2_119614;Q9ZW85	franssen_29847_3 PREDICTED: 3-isopropylmalate dehydratase small subunit 2-like n=1 Tax=Cicer arietinum RepID=UPI00032ABD22 (UniRef100_UPI00032ABD22 icov:95% qcovs:81.89% e-val:5e-137)	secondary metabolism.sulfur-containing.glucosinolates.synthesis.aliphatic.methylthioalkylmalate isomerase small subunit (MAM-IS)		1.68896	0.218819	0.113969	2.67657	0.678107	0.343649	0.0341102	0.571012		1	0.0942942		1.24025	0.310504		2.19493	0.122168		0.788506	0.00921541		7.922	0.905061
>generic|frv2_127031|p.sativum_wa1_contig30042_1	frv2_127031	p.sativum_wa1_contig30042_1 PREDICTED: vicilin-like antimicrobial peptides 2-2-like n=1 Tax=Cicer arietinum RepID=UPI00032A7EDC (UniRef100_UPI00032A7EDC icov:95% qcovs:75.1% e-val:8e-126)	development.storage proteins		1.09185	0.298891	0.143492	1.30538	0.116019	0.17449	0.457173	0.830643		1.23038	0.00324264		0.82957	0.370851		0.210228	0.125435		0.353525	0.204965		2.32781	0.0645183		X
>generic|frv2_47164|franssen_28912_2	frv2_47164;frv2_86671;frv2_94652	franssen_28912_2 60S ribosomal L8-like protein n=1 Tax=Medicago truncatula RepID=G7L3L0_MEDTR (UniRef100_G7L3L0 icov:94% qcovs:99.23% e-val:0)	protein.synthesis.ribosomal protein.eukaryotic.60S subunit.L8		0.877404	0.0771784	0.0608642	0.694162	0.0561163	0.114851	1.03889	0.86509		0.773149	0.0165941		1.13819	0.576118		1.67269	0.127137		1.04771	0.122674		1.67263	0.918724
>generic|carvalho21942|PsCam029336_1_AA	Q2N5X0;frv2_86555;frv2_49447	PsCam029336_1_AA Kynurenine formamidase OS=Erythrobacter litoralis (strain HTCC2594) GN=kynB PE=3 SV=1 (sp	DNA.unspecified		1.03378	0.813453	0.291524	2.67047	0.140677	0.194002	0.905597	0.217384		0.928702	0.0468155		0.953092	0.718216		0.294377	0.127481		1.29149	0.467877		1.72907	0.0248845
>generic|frv2_119383|p.sativum_wa1_contig24935_4	frv2_119383	p.sativum_wa1_contig24935_4 PREDICTED: protein usf-like n=1 Tax=Cicer arietinum RepID=UPI00032A54A3 (UniRef100_UPI00032A54A3 icov:99% qcovs:90.94% e-val:0)	misc.misc2		0.957916	0.480619	0.201421	0.991835	0.246667	0.249357	1.00057	0.706435		1.1267	0.0193677		1.02386	0.855707		0.738771	0.127806		0.918596	0.548587		2.45093	0.123361		X
>generic|carvalho6720|PsCam001676_1_AA	P24805;frv2_80390	PsCam001676_1_AA Stem-specific protein TSJT1 OS=Nicotiana tabacum GN=TSJT1 PE=2 SV=1 (sp	hormone metabolism.auxin.induced-regulated-responsive-activated		0.967201	0.711737	0.267247	0.961139	0.782849	0.369304	114.098	0.512051		0.902537	0.062172		0.949423	0.778244		0.434772	0.130721		3.15878	0.415673		660.19	0.0190275
>generic|frv2_47636|franssen_29214_6	frv2_47636;frv2_84564	franssen_29214_6 Aldo/keto reductase family oxidoreductase n=1 Tax=Medicago truncatula RepID=G7JTZ5_MEDTR (UniRef100_G7JTZ5 icov:97% qcovs:93.95% e-val:0)	redox.ascorbate and glutathione.ascorbate.L-galactose dehydrogenase		0.903964	0.160545	0.0924025	0.699302	0.194557	0.227841	0.911318	0.167972		1.26913	0.101678		1.05639	0.801186		0.312698	0.134347		1.40718	0.888703		0.870951	0.0359053
>generic|frv2_55823|franssen_34720_5	frv2_55823;frv2_113363	franssen_34720_5 UDP-glucosyltransferase family protein n=1 Tax=Medicago truncatula RepID=G7ILA7_MEDTR (UniRef100_G7ILA7 icov:96% qcovs:89.35% e-val:0)	secondary metabolism.flavonoids.anthocyanins		1.17376	0.144648	0.0871786	0.186972	0.881001	0.394032	2.67441	0.71844		1.48568	0.128473		0.793265	0.445854		0.299206	0.137071		1.48266	0.958239		3.30218	0.0245811
>generic|frv2_80154|Pisum_sativum_v2_Contig4039_6	frv2_80154	Pisum_sativum_v2_Contig4039_6 Uncharacterized protein n=1 Tax=Medicago truncatula RepID=I3S6I7_MEDTR (UniRef100_I3S6I7 icov:92% qcovs:93.52% e-val:5e-63)	transport.p- and v-ATPases		0.578384	0.0834719	0.0634018	2.62345	0.553691	0.321087	0.453238	0.516326		0.671449	0.28178		1.22941	0.480465		0.211267	0.138212		0.899152	0.539459		0.918737	0.00012421		X
>generic|frv2_84193|Pisum_sativum_v2_Contig6069_3	frv2_84193	Pisum_sativum_v2_Contig6069_3 Glutathione S-transferase-like protein n=3 Tax=Medicago truncatula RepID=G7JIT9_MEDTR (UniRef100_G7JIT9 icov:99% qcovs:91.16% e-val:0)	misc.glutathione S transferases		1.17193	0.152583	0.0901084	1.07612	0.619354	0.33776	0.297779	0.564955		1.20643	0.208371		1.02083	0.849735		0.515618	0.140311		0.768996	0.370722		2.34329	0.201407		X
>generic|frv2_48299|franssen_29642_4	frv2_48299	franssen_29642_4 Proteasome subunit alpha type n=1 Tax=Medicago truncatula RepID=I3SSX1_MEDTR (UniRef100_I3SSX1 icov:97% qcovs:98.73% e-val:3e-172)	protein.degradation.ubiquitin.proteasom		0.966224	0.639756	0.247489	0.779175	0.891125	0.396469	0.683026	0.633724		0.893997	0.377434		0.971537	0.764012		0.556055	0.141442		0.625081	0.483767		0.862066	0.0762106		X
>generic|frv2_80525|Pisum_sativum_v2_Contig4235_1	frv2_80525;Q93Z70	Pisum_sativum_v2_Contig4235_1 PREDICTED: probable N-acetyl-gamma-glutamyl-phosphate reductase, chloroplastic-like n=1 Tax=Cicer arietinum RepID=UPI00032A5CCE (UniRef100_UPI00032A5CCE icov:94% qcovs:93.3% e-val:0)	amino acid metabolism.synthesis.glutamate family.arginine.N-Acetylglutamate-5-P reductase		0.991801	0.890939	0.30918	0.633155	0.659564	0.34243	1.08063	0.704927		0.823662	0.997031		0.915606	0.298039		1.55429	0.143853		0.893571	0.102565		1.18721	0.0653824
>generic|frv2_117298|p.sativum_wa1_contig23330_5	frv2_117298	p.sativum_wa1_contig23330_5 PREDICTED: putative quinone-oxidoreductase homolog, chloroplastic-like n=1 Tax=Cicer arietinum RepID=UPI00032A9F67 (UniRef100_UPI00032A9F67 icov:98% qcovs:90.91% e-val:0)	misc.oxidases - copper, flavone etc		1.20293	0.17751	0.0995525	0.756835	0.571228	0.327239	0.884831	0.507439		0.951819	0.0251632		0.760769	0.340862		0.451967	0.144125		1.26773	0.45638		5.33815	0.147896		X
>generic|frv2_84258|Pisum_sativum_v2_Contig6101_4	frv2_84258;frv2_48035	Pisum_sativum_v2_Contig6101_4 Uncharacterized protein n=1 Tax=Glycine max RepID=I1MBY3_SOYBN (UniRef100_I1MBY3 icov:97% qcovs:78.42% e-val:0)	hormone metabolism.jasmonate.synthesis-degradation.12-Oxo-PDA-reductase		0.679476	0.394349	0.175326	1.71453	0.664348	0.34243	0.229103	0.370904		1.5909	0.0503106		1.0451	0.910216		0.569863	0.144489		1.52733	0.438323		2.19302	0.160483
>generic|frv2_121252|p.sativum_wa1_contig26272_4	frv2_121252	p.sativum_wa1_contig26272_4 PREDICTED: uncharacterized protein LOC101514340 n=1 Tax=Cicer arietinum RepID=UPI00032A739D (UniRef100_UPI00032A739D icov:100% qcovs:81.39% e-val:2e-142)	RNA.regulation of transcription.unclassified		0.532834	0.0861704	0.0641618	3.78842	0.484659	0.304483	0.462265	0.372164		1.01944	0.844115		1.02518	0.937051		0.504515	0.145313		1.73246	0.807943		1.65022	0.177838		X
>generic|frv2_82930|Pisum_sativum_v2_Contig5438_3	frv2_82930;frv2_50325	Pisum_sativum_v2_Contig5438_3 PREDICTED: putative DNA repair protein RAD23-3-like n=1 Tax=Cicer arietinum RepID=UPI00032A93B5 (UniRef100_UPI00032A93B5 icov:90% qcovs:90.2% e-val:0)	DNA.repair		0.918464	0.372346	0.168928	1.40234	0.965155	0.414767	0.870908	0.134914		1.15544	0.17922		0.917065	0.558971		0.477658	0.146254		1.31186	0.798799		2.00577	0.121557
>generic|frv2_77957|Pisum_sativum_v2_Contig2780_1	frv2_77957	Pisum_sativum_v2_Contig2780_1 Uncharacterized protein n=1 Tax=Lotus japonicus RepID=I3SAS6_LOTJA (UniRef100_I3SAS6 icov:79% qcovs:94.78% e-val:9e-73)	not assigned.no ontology		0.9692	0.818929	0.292213	1.20917	0.641163	0.338541	11.914	0.915133		1.51789	0.111513		1.08939	0.541375		0.592905	0.152441		1.28647	0.218845		1.43328	0.236044		X
>generic|frv2_117981|p.sativum_wa1_contig23852_2	frv2_117981;O23939	p.sativum_wa1_contig23852_2 Uncharacterized protein n=1 Tax=Medicago truncatula RepID=A0A072TZA9_MEDTR (UniRef100_A0A072TZA9 icov:97% qcovs:90.22% e-val:0)	misc.oxidases - copper, flavone etc		1.06044	0.742506	0.275763	1.0508	0.304705	0.272049	0.58281	0.253268		0.970293	0.186195		0.680195	0.161255		2.42296	0.156118		0.244651	0.794705		0.997582	0.0916383
>generic|frv2_50390|franssen_31079_2	frv2_50390;frv2_111505	franssen_31079_2 PREDICTED: peptidyl-prolyl cis-trans isomerase FKBP62-like n=1 Tax=Cicer arietinum RepID=UPI00032A8EA9 (UniRef100_UPI00032A8EA9 icov:96% qcovs:89.43% e-val:0)	protein.folding		1.02932	0.818853	0.292213	0.752875	0.0799081	0.141192	0.853445	0.0109183		1.02543	0.141838		0.96522	0.776596		1.52628	0.158133		1.16058	0.052997		0.8029	0.0622923
>generic|carvalho8975|PsCam005230_1_AA	Q9M5L0;frv2_75388;frv2_75392;frv2_75390;frv2_48700;frv2_48546;frv2_75389;frv2_95783	PsCam005230_1_AA 60S ribosomal protein L35 OS=Euphorbia esula GN=RPL35 PE=2 SV=1 (sp	protein.synthesis.ribosomal protein.eukaryotic.60S subunit.L35		0.700543	0.373901	0.168928	0.321873	0.500966	0.306933	0.0898698	0.373901		0.418275	0.245441		1.83224	0.0979848		2.65463	0.160715		0.664739	0.551025		1.59325	0.0510297
>generic|frv2_80246|Pisum_sativum_v2_Contig4088_1	frv2_80246	Pisum_sativum_v2_Contig4088_1 PREDICTED: phospholipase D alpha 1-like isoform X1 n=1 Tax=Cicer arietinum RepID=UPI00032A6859 (UniRef100_UPI00032A6859 icov:99% qcovs:92.06% e-val:0)	lipid metabolism.lipid degradation.lysophospholipases.phospholipase D		0.710547	0.0676754	0.0556593	0.879709	0.131631	0.187825	0.913902	0.106991		1.09431	0.0524377		1.08478	0.328382		0.608353	0.164355		1.15749	0.202484		1.92245	0.0231433		X
>generic|frv2_53245|franssen_33039_6	frv2_53245;frv2_110169	franssen_33039_6 Prefoldin subunit 5 n=1 Tax=Medicago truncatula RepID=G7IE99_MEDTR (UniRef100_G7IE99 icov:93% qcovs:96.71% e-val:3e-101)	RNA.regulation of transcription.unclassified		0.93564	0.740427	0.27543	1.51139	0.844186	0.384266	0.510689	0.59658		1.06901	0.157273		0.947823	0.614458		0.464346	0.166265		1.10712	0.617447		0.692235	0.000565236
>generic|carvalho23959|PsCam034205_1_AA	Q99070	PsCam034205_1_AA Glycine-rich RNA-binding protein 2 OS=Sorghum bicolor GN=GRP2 PE=2 SV=1 (sp	RNA.regulation of transcription.GRP		1.0597	0.629252	0.244303	0.971816	0.309559	0.272853	0.224293	0.500621		2.51986	0.163568		0.944563	0.781256		0.369328	0.168188		0.888821	0.353276		9.39778	0.0271706		X
>generic|carvalho10176|PsCam007049_1_AA	Q54JE4	PsCam007049_1_AA 2-oxoglutarate dehydrogenase, mitochondrial OS=Dictyostelium discoideum GN=ogdh PE=3 SV=1 (sp	TCA / org transformation.TCA.2-oxoglutarate dehydrogenase		0.97026	0.641892	0.247691	0.216319	0.116649	0.17449	0.430291	0.694994		0.674705	0.0599233		1.00384	0.976364		1.61809	0.169633		0.660934	0.466042		2.08678	0.234922		X
>generic|frv2_50714|franssen_31308_5	frv2_50714;frv2_85186;Q9XEE2	franssen_31308_5 Annexin (Fragment) n=1 Tax=Medicago sativa RepID=Q42922_MEDSA (UniRef100_Q42922 icov:92% qcovs:91.88% e-val:0)	cell.organisation		0.996444	0.991563	0.33336	1.59437	0.224926	0.238173	0.215393	0.195734		0.82286	0.22857		1.09786	0.465645		0.470169	0.169737		0.794785	0.11346		1.46504	0.739449
>generic|frv2_46352|franssen_28435_2	frv2_46352	franssen_28435_2 40S ribosomal protein S13 n=1 Tax=Pisum sativum RepID=RS13_PEA (UniRef100_P46298 icov:88% qcovs:99.34% e-val:5e-101)	protein.synthesis.ribosomal protein.eukaryotic.40S subunit.S13		0.91811	0.439836	0.189242	0.629547	0.238136	0.248298	1.42639	0.16064		1.94928	0.811769		1.13792	0.281184		2.27946	0.170077		1.65048	0.885		1.08268	0.166376		X
>generic|frv2_85682|Pisum_sativum_v2_Contig6818_2	frv2_85682;P22778;frv2_71946	Pisum_sativum_v2_Contig6818_2 PREDICTED: ATP synthase subunit O, mitochondrial-like n=1 Tax=Cicer arietinum RepID=UPI00032AD0ED (UniRef100_UPI00032AD0ED icov:98% qcovs:88.52% e-val:7e-156)	mitochondrial electron transport / ATP synthesis.F1-ATPase		1.07127	0.443622	0.18983	0.864334	0.0789231	0.140077	0.673862	0.128766		0.924311	0.197876		1.09937	0.306267		0.461416	0.172073		0.545969	0.178409		1.40205	0.329621
>generic|frv2_53662|franssen_33322_4	frv2_53662;frv2_82147	franssen_33322_4 Protein disulfide-isomerase n=1 Tax=Medicago truncatula RepID=B7FM01_MEDTR (UniRef100_B7FM01 icov:98% qcovs:84.41% e-val:0)	redox.thioredoxin.PDIL		0.895395	0.206744	0.109919	2.37803	0.751176	0.359939	1.22981	0.538514		0.621287	0.0945495		0.960141	0.316679		0.414306	0.177095		0.566987	0.377865		0.679792	0.172839
>generic|frv2_124150|p.sativum_wa1_contig28225_3	frv2_124150;frv2_103380;frv2_3680	p.sativum_wa1_contig28225_3 Uncharacterized protein n=1 Tax=Lotus japonicus RepID=I3S617_LOTJA (UniRef100_I3S617 icov:92% qcovs:88.69% e-val:6e-105)	mitochondrial electron transport / ATP synthesis.F1-ATPase		0.940277	0.420801	0.184151	0.0701343	0.444565	0.30181	6.90128	0.207682		0.821462	0.0528006		0.97113	0.843238		0.301778	0.177704		1.62702	0.436409		5.75901	0.106569
>tr|Q5DJ04|Q5DJ04_RHILE	Q5DJ04;O33528	Q5DJ04_RHILE Chaperone protein DnaK OS=Rhizobium leguminosarum GN=dnaK PE=2 SV=1	stress.abiotic.heat		1.02806	0.432846	0.186963	1.28122	0.431988	0.298912	57.1994	0.961302		1.6086	0.0572265		1.02711	0.891695		0.531813	0.18031		1.6587	0.681237		98.2035	0.0341749
>generic|frv2_2186|franssen_1291_4	frv2_2186;frv2_88831;frv2_2187;frv2_46563	franssen_1291_4 Cytochrome b5-like heme/steroid-binding domain protein n=1 Tax=Medicago truncatula RepID=G7J9T0_MEDTR (UniRef100_G7J9T0 icov:95% qcovs:92% e-val:3e-61)	redox.ascorbate and glutathione		0.516511	0.179616	0.100184	1.14528	0.95951	0.414036	0.165317	0.465212		0.807653	0.0526917		0.729699	0.416765		0.561611	0.180488		1.54627	0.153461		1.00963	0.891189
>generic|frv2_81435|Pisum_sativum_v2_Contig4695_3	frv2_81435	Pisum_sativum_v2_Contig4695_3 Protein disulfide-isomerase n=1 Tax=Medicago truncatula RepID=G7JPD1_MEDTR (UniRef100_G7JPD1 icov:94% qcovs:86.3% e-val:0)	redox.thioredoxin.PDIL		1.24717	0.281347	0.136999	1.22674	0.127032	0.184169	0.402322	0.117548		1.06335	0.0144935		1.18328	0.535384		0.368917	0.183429		1.37809	0.163243		1.28692	0.570504		X
>generic|frv2_98680|p.sativum_wa1_contig06858_6	frv2_98680;frv2_76685;frv2_43093;frv2_98682	p.sativum_wa1_contig06858_6 PREDICTED: dihydropyrimidinase-like isoform X1 n=1 Tax=Cicer arietinum RepID=UPI00032A5007 (UniRef100_UPI00032A5007 icov:96% qcovs:88.62% e-val:0)	nucleotide metabolism.degradation.pyrimidine.dihydropyrimidinase		1.09229	0.0945411	0.0679217	0.301493	0.0521438	0.11018	1.70172	0.00993899		1.03889	0.0322659		0.943562	0.723942		0.471546	0.185688		2.34379	0.7466		2.21922	0.00408677
>generic|frv2_47102|franssen_28872_2	frv2_47102;E1U332;frv2_73789	franssen_28872_2 Allergenic isoflavone reductase-like protein Bet protein n=1 Tax=Medicago truncatula RepID=I3SC37_MEDTR (UniRef100_I3SC37 icov:98% qcovs:90.97% e-val:0)	secondary metabolism.flavonoids.isoflavones.isoflavone reductase		0.828651	0.0669633	0.0553705	1.39826	0.399612	0.295081	0.707302	0.027269		0.743934	0.00729549		0.875449	0.334837		0.566486	0.186004		0.774214	0.170548		1.36184	0.469707
>generic|carvalho16467|PsCam021139_1_AA	Q9LHP1;frv2_86018	PsCam021139_1_AA 60S ribosomal protein L7-4 OS=Arabidopsis thaliana GN=RPL7D PE=2 SV=1 (sp	protein.synthesis.ribosomal protein.eukaryotic.60S subunit.L7		0.783438	0.0606151	0.0519414	1.58422	0.571315	0.327239	0.623116	0.404317		1.14859	0.128485		1.26399	0.173355		1.86407	0.187671		1.84783	0.0506037		2.5004	0.87137
>generic|frv2_81447|Pisum_sativum_v2_Contig4701_1	frv2_81447;Q0AW31;A7GKI2	Pisum_sativum_v2_Contig4701_1 Aicarft/IMPCHase bienzyme family protein n=1 Tax=Medicago truncatula RepID=G7KEF8_MEDTR (UniRef100_G7KEF8 icov:97% qcovs:91.64% e-val:0)	nucleotide metabolism.synthesis.purine.AICAR transformylase		2.28164	0.0561575	0.049135	0.911176	0.493604	0.305258	0.331039	0.634791		1.7421	0.28338		1.29541	0.422875		5.57729	0.188278		2.18747	0.371622		1.83337	0.283361
>generic|carvalho12453|PsCam011280_1_AA	O65282;frv2_76075;frv2_76076	PsCam011280_1_AA 20 kDa chaperonin, chloroplastic OS=Arabidopsis thaliana GN=CPN21 PE=1 SV=2 (sp	protein.folding		0.988941	0.925475	0.317928	0.0138493	0.0821151	0.14286	0.688402	0.170691		0.847112	0.0733955		0.789757	0.160902		0.385003	0.189957		1.65051	0.380464		2.31184	0.0103144
>generic|frv2_49589|franssen_30515_1	frv2_49589;A6BM60;frv2_76227	franssen_30515_1 Adenine nucleotide alpha hydrolase superfamily protein n=1 Tax=Medicago truncatula RepID=B7FGP5_MEDTR (UniRef100_B7FGP5 icov:85% qcovs:92.73% e-val:3e-107)	stress.abiotic.cold		0.901105	0.203588	0.108617	0.741865	0.0907958	0.150993	1.32368	0.0190676		0.718143	0.0105257		0.880469	0.379816		0.376147	0.191194		1.00453	0.361682		1.83101	0.00641284
>generic|frv2_74593|Pisum_sativum_v2_Contig478_5	frv2_74593	Pisum_sativum_v2_Contig478_5 Vicilin 47k n=2 Tax=Pisum sativum RepID=Q43626_PEA (UniRef100_Q43626 icov:96% qcovs:99.77% e-val:0)	development.storage proteins		0.99664	0.955953	0.324762	1.0182	0.507676	0.307869	2.53294	0.741284		1.03917	0.0680952		0.834704	0.086393		0.374468	0.19474		0.980499	0.951539		1.16177	0.0718824		X
>generic|frv2_113573|p.sativum_wa1_contig20335_6	frv2_113573	p.sativum_wa1_contig20335_6 UDP-glucose flavonoid 3-O-glucosyltransferase n=1 Tax=Medicago truncatula RepID=G7K391_MEDTR (UniRef100_G7K391 icov:99% qcovs:74.59% e-val:0)	hormone metabolism.abscisic acid.synthesis-degradation		1.19368	0.258164	0.126716	0.932861	0.269393	0.258795	0.599621	0.70819		1.34122	0.0578774		1.03322	0.899215		0.299765	0.200151		0.850497	0.577513		2.61651	0.0690768		X
>generic|carvalho32337|PsCam046309_1_AA	Q9SWE7;frv2_109379	PsCam046309_1_AA V-type proton ATPase subunit E OS=Citrus limon GN=VATE PE=2 SV=1 (sp	transport.p- and v-ATPases.H+-transporting two-sector ATPase		0.906069	0.232829	0.11845	0.229042	0.281117	0.265624	0.485734	0.0494672		1.05	0.36866		1.16782	0.332235		0.346862	0.200317		0.502624	0.320746		1.05608	0.227643
>generic|frv2_80019|Pisum_sativum_v2_Contig3969_6	frv2_80019;frv2_47376	Pisum_sativum_v2_Contig3969_6 PREDICTED: mitochondria fission 1 protein-like isoform X2 n=1 Tax=Cicer arietinum RepID=UPI00032A9426 (UniRef100_UPI00032A9426 icov:85% qcovs:89.14% e-val:3e-107)	cell.division		1.26226	0.341	0.15802	1.92965	0.729674	0.354355	0.14509	0.772181		1.16844	0.497569		1.01345	0.974098		0.330785	0.20086		1.74877	0.498074		2.06056	0.122304
>generic|frv2_82174|Pisum_sativum_v2_Contig5063_2	frv2_82174;frv2_47080;Q9SZD4;frv2_113632	Pisum_sativum_v2_Contig5063_2 PREDICTED: 26S proteasome regulatory subunit 4 homolog A-like n=1 Tax=Cicer arietinum RepID=UPI00032ABC3F (UniRef100_UPI00032ABC3F icov:98% qcovs:99.76% e-val:0)	protein.degradation.ubiquitin.proteasom		1.06009	0.722047	0.269798	1.43502	0.684269	0.344163	0.848208	0.640314		0.936372	0.249441		0.870678	0.533445		0.494876	0.201114		1.56811	0.756629		1.93547	0.139312
>generic|frv2_86506|Pisum_sativum_v2_Contig7229_6	frv2_86506;frv2_47765	Pisum_sativum_v2_Contig7229_6 Proteasome subunit alpha type-7 n=1 Tax=Cicer arietinum RepID=PSA7_CICAR (UniRef100_Q9SXU1 icov:88% qcovs:98.8% e-val:3e-179)	protein.degradation		1.07741	0.0979081	0.0695265	0.774581	0.0518973	0.11018	3.04645	0.040232		0.808519	0.675319		1.12949	0.46258		0.625662	0.201633		1.07988	0.790365		1.26571	0.0881693
>generic|frv2_79889|Pisum_sativum_v2_Contig3900_2	frv2_79889;Q9M7T0	Pisum_sativum_v2_Contig3900_2 Mitochondrial peroxiredoxin n=1 Tax=Pisum sativum RepID=Q6KBB1_PEA (UniRef100_Q6KBB1 icov:93% qcovs:100% e-val:2e-141)	redox.peroxiredoxin		1.07492	0.648868	0.24861	0.67803	0.898512	0.397346	0.352428	0.843669		1.09197	0.840036		0.928652	0.641394		0.354371	0.20232		1.62461	0.584897		2.48289	0.0906867
>generic|frv2_110960|p.sativum_wa1_contig17884_5	frv2_110960;Q43314	p.sativum_wa1_contig17884_5 Glutamate dehydrogenase n=2 Tax=Medicago truncatula RepID=A0A072U1I8_MEDTR (UniRef100_A0A072U1I8 icov:100% qcovs:96.88% e-val:0)	N-metabolism.N-degradation.glutamate dehydrogenase		0.974756	0.801471	0.289535	0.50148	0.295759	0.27021	0.769453	0.903413		0.709439	0.139498		0.96529	0.736227		0.611819	0.205766		1.71254	0.367508		1.32945	0.309471
>generic|frv2_50670|franssen_31277_1	frv2_50670;frv2_113745;Q8VXY9	franssen_31277_1 N-carbamyl-L-amino acid amidohydrolase n=1 Tax=Medicago truncatula RepID=G7I3Z0_MEDTR (UniRef100_G7I3Z0 icov:96% qcovs:93.36% e-val:0)	protein.degradation		0.858097	0.168731	0.0955015	1.44985	0.194927	0.227841	0.776639	0.113609		1.05492	0.625157		0.995755	0.954914		0.650628	0.206385		1.46638	0.0357838		2.6467	0.975993
>generic|frv2_116067|p.sativum_wa1_contig22376_6	frv2_116067;frv2_47707;frv2_78982;frv2_104859;Q9SMM9	p.sativum_wa1_contig22376_6 PREDICTED: probable carboxylesterase 12-like n=1 Tax=Cicer arietinum RepID=UPI00032AAD02 (UniRef100_UPI00032AAD02 icov:99% qcovs:80.98% e-val:0)	lipid metabolism.lipid degradation.lysophospholipases.carboxylesterase		0.351577	0.118581	0.0789144	6.92682	0.0669469	0.12739	0.143097	0.0483794		1	0.746722		1.33251	0.343137		2.72707	0.209555		0.14185	0.496214		0.262724	0.14539
>generic|frv2_81717|Pisum_sativum_v2_Contig4835_1	frv2_81717	Pisum_sativum_v2_Contig4835_1 TCP-1/cpn60 chaperonin family protein n=1 Tax=Medicago truncatula RepID=G7J2L7_MEDTR (UniRef100_G7J2L7 icov:99% qcovs:97.76% e-val:0)	protein.postranslational modification		1.00952	0.923947	0.317759	2.46024	0.200663	0.229805	0.375707	0.415256		1.41829	0.179023		0.946859	0.668101		0.512521	0.210104		0.861339	0.457565		1.54424	0.0909849		X
>generic|frv2_65564|franssen_40513_3	frv2_65564;frv2_74355;frv2_98163	franssen_40513_3 Uncharacterized protein n=1 Tax=Medicago truncatula RepID=I3SQ55_MEDTR (UniRef100_I3SQ55 icov:94% qcovs:82.54% e-val:7e-106)	stress.biotic		1.04854	0.594889	0.236393	2.03023	0.570536	0.327239	0.381177	0.502253		1.08027	0.0765294		0.932221	0.706269		0.491795	0.211561		1.2645	0.332997		2.75648	0.0068678
>generic|frv2_50739|franssen_31328_4	frv2_50739;frv2_82748;A5PKH3	franssen_31328_4 Fumarylacetoacetase n=1 Tax=Medicago truncatula RepID=Q2HT34_MEDTR (UniRef100_Q2HT34 icov:97% qcovs:92.64% e-val:0)	amino acid metabolism.degradation.aromatic aa.tyrosine		1.23854	0.121374	0.0796961	0.766706	0.844402	0.384266	1.75886	0.86183		1.26372	0.129159		1.02589	0.688971		0.455079	0.216324		0.913304	0.775624		0.716624	0.0205693
>generic|frv2_85403|Pisum_sativum_v2_Contig6678_3	frv2_85403	Pisum_sativum_v2_Contig6678_3 Outer plastidial membrane protein porin n=1 Tax=Pisum sativum RepID=VDAC_PEA (UniRef100_P42054 icov:91% qcovs:100% e-val:0)	transport.porins		0.965657	0.645316	0.248076	2.06696	0.847249	0.385	0.610516	0.721243		0.85778	0.508902		0.903869	0.103868		0.598713	0.218716		0.639618	0.626982		1.97417	0.152456		X
>generic|frv2_81614|Pisum_sativum_v2_Contig4784_3	frv2_81614	Pisum_sativum_v2_Contig4784_3 Uncharacterized protein n=3 Tax=Soja RepID=I1NI06_SOYBN (UniRef100_I1NI06 icov:99% qcovs:84.52% e-val:0)	RNA.RNA binding		0.933455	0.430249	0.186856	1.10548	0.932204	0.405004	1.31352	0.776755		1.04963	0.44507		1.01343	0.920715		0.48176	0.219395		1.04273	0.986553		3.83934	0.032057		X
>generic|frv2_85327|Pisum_sativum_v2_Contig6640_3	frv2_85327;frv2_59493	Pisum_sativum_v2_Contig6640_3 RNA recognition motif n=1 Tax=Medicago truncatula RepID=G7LGY9_MEDTR (UniRef100_G7LGY9 icov:89% qcovs:95.34% e-val:0)	RNA.RNA binding		1.40924	0.050465	0.0466302	0.690057	0.775622	0.366768	0.418574	0.924012		0.927996	0.866976		0.901604	0.551211		0.231009	0.219431		1.07126	0.872765		2.24105	0.0127073
>generic|frv2_48670|franssen_29897_6	frv2_48670;frv2_130408;frv2_48672	franssen_29897_6 Peptidase inhibitor I9 n=1 Tax=Medicago truncatula RepID=G7I7U9_MEDTR (UniRef100_G7I7U9 icov:99% qcovs:80.6% e-val:2e-56)	not assigned.no ontology		0.9134	0.159514	0.0921551	0.835243	0.334095	0.27944	0.833624	0.884364		0.728661	0.0712721		0.722706	0.192016		0.419509	0.222152		0.393319	0.713708		0.216877	0.214456
>generic|frv2_82718|Pisum_sativum_v2_Contig5334_2	frv2_82718;frv2_55080;O24496	Pisum_sativum_v2_Contig5334_2 Hydroxyacylglutathione hydrolase n=1 Tax=Medicago truncatula RepID=G7KDB9_MEDTR (UniRef100_G7KDB9 icov:89% qcovs:89.15% e-val:3e-171)	Biodegradation of Xenobiotics.hydroxyacylglutathione hydrolase		1.16984	0.222378	0.115041	2.3599	0.621422	0.337849	57.7304	0.772672		1.18494	0.896302		0.738477	0.0733865		0.120989	0.225485		1.57997	0.426574		124.832	0.0583228
>generic|frv2_112013|p.sativum_wa1_contig18939_6	frv2_112013	p.sativum_wa1_contig18939_6 PREDICTED: globulin-1 S allele-like n=1 Tax=Cicer arietinum RepID=UPI00032A7E20 (UniRef100_UPI00032A7E20 icov:66% qcovs:79.02% e-val:0)	not assigned.no ontology		0.871065	0.0794188	0.0622159	0.981934	0.441519	0.300774	0.788781	0.618958		0.957086	6.36303e-05		1.06242	0.634137		0.557302	0.225561		1.11789	0.90767		1.24267	0.0545325		X
>generic|frv2_47702|franssen_29254_3	frv2_47702;frv2_112077;O48905	franssen_29254_3 Malate dehydrogenase n=1 Tax=Medicago truncatula RepID=B7FJQ4_MEDTR (UniRef100_B7FJQ4 icov:91% qcovs:96.39% e-val:0)	TCA / org transformation.other organic acid transformatons.cyt MDH		1.00558	0.916042	0.315748	0.0225399	0.198442	0.228319	0.688686	0.428384		0.671759	0.000755637		1.0323	0.639841		0.507818	0.226543		1.21545	0.874526		0.871012	0.0569134
>generic|frv2_83735|Pisum_sativum_v2_Contig5841_2	frv2_83735;Q47N80	Pisum_sativum_v2_Contig5841_2 Plant/T7N9-9 protein n=3 Tax=Medicago truncatula RepID=G7K9S9_MEDTR (UniRef100_G7K9S9 icov:92% qcovs:81.82% e-val:0)	not assigned.unknown		0.627462	0.0860102	0.0641618	2.8131	0.282435	0.266147	0.913421	0.163032		2.29106	0.905551		1.01542	0.884642		0.46836	0.226682		1.33243	0.816378		5.62015	0.0407449
>generic|frv2_113491|p.sativum_wa1_contig20255_6	frv2_113491;frv2_90638	p.sativum_wa1_contig20255_6 Uncharacterized protein n=2 Tax=Soja RepID=I1JCF9_SOYBN (UniRef100_I1JCF9 icov:93% qcovs:85.93% e-val:0)	protein.degradation.ubiquitin		1.22026	0.0722066	0.0587274	1.16092	0.617268	0.33776	0.743427	0.634466		0.897597	0.113112		0.991168	0.959517		0.431601	0.226936		1.26694	0.668977		1.93439	0.153528
>generic|frv2_81576|Pisum_sativum_v2_Contig4765_2	frv2_81576;frv2_49144;Q8L7N0	Pisum_sativum_v2_Contig4765_2 TCP-1/cpn60 chaperonin family protein n=2 Tax=Medicago truncatula RepID=A0A072TVM3_MEDTR (UniRef100_A0A072TVM3 icov:99% qcovs:96.45% e-val:0)	protein.folding		0.920415	0.215575	0.11324	0.516251	0.114833	0.174138	1.09626	0.311662		0.861703	0.00790834		0.965948	0.775416		0.6293	0.229374		0.809449	0.344862		1.6124	0.150411
>generic|carvalho8904|PsCam005116_1_AA	Q94AZ4;frv2_86145;frv2_48083	PsCam005116_1_AA Probable calcium-binding protein CML13 OS=Arabidopsis thaliana GN=CML13 PE=2 SV=1 (sp	protein.postranslational modification		0.827249	0.124494	0.0807426	0.923319	0.0689302	0.128561	0.847191	0.0048552		0.963519	0.0052216		1.42057	0.190028		0.499656	0.23269		0.713567	0.178103		1.08869	0.452827
>generic|carvalho24522|PsCam035085_1_AA	A8LDR3	PsCam035085_1_AA Adenylosuccinate synthetase OS=Frankia sp. (strain EAN1pec) GN=purA PE=3 SV=1 (sp	not assigned.unknown		2.14468	0.0573219	0.0498152	2.09326	0.516907	0.309045	0.920595	0.764377		1.04972	0.904984		0.584838	0.495892		0.1706	0.234652		1	0.604077		1	0.242804		X
>generic|frv2_52400|franssen_32465_2	frv2_52400;frv2_100626	franssen_32465_2 PREDICTED: aldo-keto reductase family 4 member C9-like n=1 Tax=Cicer arietinum RepID=UPI00032AA0BB (UniRef100_UPI00032AA0BB icov:97% qcovs:91.43% e-val:0)	minor CHO metabolism.others		1.45746	0.0527589	0.0470493	2.53395	0.316494	0.274241	0.788302	0.457026		0.897868	0.399468		0.827086	0.272998		0.459595	0.235115		4.72521	0.953877		3.30883	0.103137
>generic|frv2_3672|franssen_2147_4	frv2_3672;O50003;frv2_95470;frv2_95472;frv2_129352;frv2_89611;Q9FF52;frv2_47439	franssen_2147_4 60S ribosomal L12-like protein n=1 Tax=Medicago truncatula RepID=B7FH91_MEDTR (UniRef100_B7FH91 icov:96% qcovs:99.35% e-val:6e-103)	protein.synthesis.ribosomal protein.eukaryotic.60S subunit.L12		1.21509	0.119809	0.0791163	0.102487	0.388735	0.292507	0.40201	0.463802		0.774958	0.164047		1.08034	0.218318		1.53698	0.236304		0.571651	0.587581		1.02172	0.0736143
>generic|frv2_74504|Pisum_sativum_v2_Contig430_4	frv2_74504	Pisum_sativum_v2_Contig430_4 Vicilin n=1 Tax=Pisum sativum RepID=VCLC_PEA (UniRef100_P13918 icov:96% qcovs:100% e-val:0)	development.storage proteins		0.950879	0.39715	0.17581	1.03437	0.391788	0.293257	1.06867	0.674236		0.71437	0.025196		0.822912	0.103068		0.495592	0.236691		0.8625	0.881647		1.84941	0.0579432		X
>generic|frv2_41594|franssen_25393_3	frv2_41594;frv2_77734;frv2_72906;frv2_31387;frv2_89132	franssen_25393_3 ABA-responsive protein ABR17 n=1 Tax=Pisum sativum RepID=ABR17_PEA (UniRef100_Q06931 icov:98% qcovs:100% e-val:7e-59)	not assigned.unknown		0.929645	0.169606	0.09582	0.789594	0.131926	0.187825	0.476832	0.320747		0.751073	0.190277		0.925415	0.304337		0.509571	0.238587		0.354357	0.649219		0.404298	0.146778
>generic|frv2_83837|Pisum_sativum_v2_Contig5889_4	frv2_83837;Q8L831	Pisum_sativum_v2_Contig5889_4 PREDICTED: nudix hydrolase 3-like n=1 Tax=Cicer arietinum RepID=UPI00032A61F9 (UniRef100_UPI00032A61F9 icov:98% qcovs:92.34% e-val:0)	nucleotide metabolism.salvage.NUDIX hydrolases		0.748821	0.290711	0.140265	0.875043	0.427194	0.298912	0.850353	0.229454		1.09309	0.0798977		0.932832	0.504298		0.538343	0.245295		1.64447	0.90016		2.41469	0.158212
>generic|frv2_115661|p.sativum_wa1_contig22072_4	frv2_115661;frv2_49613;frv2_111657;Q2RAK2	p.sativum_wa1_contig22072_4 Pyruvate kinase n=1 Tax=Medicago truncatula RepID=Q1SN32_MEDTR (UniRef100_Q1SN32 icov:100% qcovs:96.88% e-val:0)	glycolysis.cytosolic branch.pyruvate kinase (PK)		0.945361	0.614793	0.241258	0.208566	0.734767	0.355263	1.07676	0.835894		0.843761	0.746986		1.21988	0.21638		1.46619	0.245616		0.569006	0.0947369		0.406345	0.665321
>generic|frv2_87463|Pisum_sativum_v2_Contig7705_1	frv2_87463	Pisum_sativum_v2_Contig7705_1 Arabinogalactan protein n=1 Tax=Medicago truncatula RepID=A0A072TSU7_MEDTR (UniRef100_A0A072TSU7 icov:95% qcovs:90.87% e-val:1e-135)	not assigned.unknown		1.04665	0.722003	0.269798	1.40781	0.960315	0.414036	0.605271	0.880962		0.865956	0.273563		0.821889	0.456855		0.50111	0.247568		1.03407	0.298086		0.851685	0.166926		X
>generic|frv2_114062|p.sativum_wa1_contig20749_5	frv2_114062	p.sativum_wa1_contig20749_5 PREDICTED: 26S protease regulatory subunit 8 homolog A-like n=1 Tax=Cicer arietinum RepID=UPI00032A5C10 (UniRef100_UPI00032A5C10 icov:98% qcovs:99.04% e-val:0)	protein.degradation.ubiquitin.proteasom		1.00143	0.990557	0.33336	0.79	0.803131	0.374851	0.953571	0.614751		0.916436	0.133824		0.749678	0.456822		1.61726	0.247918		0.635214	0.243339		0.642728	0.609444		X
>generic|frv2_119198|p.sativum_wa1_contig24787_4	frv2_119198;frv2_119875;Q9SCM3;Q93VB8;frv2_92397	p.sativum_wa1_contig24787_4 PREDICTED: 40S ribosomal protein S2-3-like n=1 Tax=Cicer arietinum RepID=UPI00032AB105 (UniRef100_UPI00032AB105 icov:95% qcovs:98.55% e-val:0)	protein.synthesis.ribosomal protein.eukaryotic.40S subunit.S2		1.06678	0.316872	0.150709	0.387427	0.344185	0.285231	0.386871	0.0592212		0.92223	0.00433949		1.09821	0.225645		1.68411	0.249063		0.552056	0.848719		1.88361	0.0444132
>generic|carvalho17814|PsCam023398_1_AA	Q9FIK0	PsCam023398_1_AA ATP-dependent 6-phosphofructokinase 2 OS=Arabidopsis thaliana GN=PFK2 PE=1 SV=1 (sp	glycolysis.cytosolic branch.phosphofructokinase (PFK)		0.743975	0.131047	0.082755	2.48448	0.508552	0.307869	0.997143	0.497901		3.34603	0.16819		1.15726	0.614751		0.513019	0.254438		1.62718	0.0795678		3.2264	0.00151442		X
>generic|frv2_80946|Pisum_sativum_v2_Contig4451_2	frv2_80946	Pisum_sativum_v2_Contig4451_2 Bacterial long-chain fatty acid CoA synthetase n=1 Tax=Medicago truncatula RepID=G7JI82_MEDTR (UniRef100_G7JI82 icov:100% qcovs:92.43% e-val:0)	lipid metabolism.FA synthesis and FA elongation.long chain fatty acid CoA ligase		1.16469	0.21364	0.11261	0.723321	0.191838	0.22733	25.9231	0.742401		1.63644	0.0587599		0.88125	0.341582		1.39502	0.254847		1.09545	0.221032		226.751	0.435092		X
>generic|frv2_80430|Pisum_sativum_v2_Contig4185_5	frv2_80430;P46254	Pisum_sativum_v2_Contig4185_5 Heat shock 22 kDa protein, mitochondrial n=1 Tax=Pisum sativum RepID=HS22M_PEA (UniRef100_P46254 icov:91% qcovs:100% e-val:2e-142)	stress.abiotic.heat		0.99468	0.931004	0.31942	0.613234	0.758184	0.361546	0.335402	0.816431		0.856024	0.536458		1.09339	0.636089		0.13149	0.254926		1.61361	0.364639		1.16099	0.0284438
>generic|frv2_85870|Pisum_sativum_v2_Contig6911_5	frv2_85870;frv2_53550;Q9SX77	Pisum_sativum_v2_Contig6911_5 Succinate dehydrogenase n=2 Tax=Medicago truncatula RepID=G7I4F8_MEDTR (UniRef100_G7I4F8 icov:95% qcovs:83.47% e-val:1e-129)	not assigned.unknown		1.07739	0.608913	0.240263	1.69257	0.844484	0.384266	0.0876357	0.734388		0.444059	0.497247		1.75067	0.216291		0.345862	0.255245		0.105175	0.544843		0.249221	0.0489498
>generic|frv2_76719|Pisum_sativum_v2_Contig2028_3	frv2_76719;frv2_98784;frv2_128669	Pisum_sativum_v2_Contig2028_3 PREDICTED: uncharacterized GPI-anchored protein At5g19250-like n=1 Tax=Cicer arietinum RepID=UPI00032AB2AE (UniRef100_UPI00032AB2AE icov:94% qcovs:75.9% e-val:4e-101)	not assigned.unknown		0.982653	0.877762	0.307059	0.826576	0.514803	0.308887	1.53094	0.941864		0.780497	0.129269		0.811439	0.224337		0.516578	0.257774		0.993078	0.837817		1.43259	0.247233
>generic|frv2_1548|franssen_921_5	frv2_1548	franssen_921_5 D-glycerate dehydrogenase/hydroxypyruvate reductase n=1 Tax=Medicago truncatula RepID=A0A072UGE8_MEDTR (UniRef100_A0A072UGE8 icov:80% qcovs:88.89% e-val:3e-105)	C1-metabolism.formate dehydrogenase		0.971827	0.843555	0.298476	0.544748	0.108929	0.168096	0.859636	0.0281778		0.904435	0.628133		0.941716	0.869507		0.42972	0.258395		1.46109	0.262326		2.47141	0.0223037		X
>generic|carvalho34773|PsCam049778_1_AA	P08438;frv2_74598	PsCam049778_1_AA Vicilin OS=Vicia faba PE=2 SV=1 (sp	development.storage proteins		1.12308	0.139488	0.0859119	1.14435	0.215268	0.235363	1.33417	0.355056		1.26027	0.0119592		0.853599	0.0806385		0.595371	0.258949		2.03904	0.997921		3.42477	0.115662
>generic|frv2_69316|franssen_42759_2	frv2_69316;frv2_81613	franssen_42759_2 Ketol-acid reductoisomerase, chloroplastic n=1 Tax=Pisum sativum RepID=ILV5_PEA (UniRef100_O82043 icov:99% qcovs:99.48% e-val:0)	amino acid metabolism.synthesis.branched chain group.common.ketol-acid reductoisomerase		0.818464	0.0636325	0.0534813	1.54384	0.0822957	0.14286	0.825536	0.034625		1.05447	0.0122696		1.21827	0.28917		1.88802	0.260622		1.23509	0.547057		1.02578	0.00446061
>generic|frv2_58830|franssen_36485_5	frv2_58830	franssen_36485_5 Phosphoglucan, water dikinase n=1 Tax=Medicago truncatula RepID=A0A072UCX7_MEDTR (UniRef100_A0A072UCX7 icov:99% qcovs:96.75% e-val:3e-73)	major CHO metabolism.degradation.starch.glucan water dikinase		0.967327	0.806015	0.289535	1.61749	0.25959	0.253688	0.901117	0.373381		1.03203	0.01432		0.842021	0.491533		0.15826	0.263501		1.19673	0.486143		1.5415	0.0516786		X
>generic|carvalho12137|PsCam010869_1_AA	Q1W376;frv2_84162	PsCam010869_1_AA Phosphomannomutase OS=Glycine max PE=2 SV=1 (sp	cell wall.precursor synthesis.phosphomannomutase		1.09829	0.252158	0.124365	1.30929	0.0831855	0.143774	0.733075	0.0437179		0.835818	0.00322532		0.909104	0.455304		0.544722	0.264439		0.874862	0.283604		1.92026	0.935426
>generic|frv2_65982|franssen_40762_3	frv2_65982;frv2_120890	franssen_40762_3 Methylesterase n=1 Tax=Medicago truncatula RepID=A0A072TUI1_MEDTR (UniRef100_A0A072TUI1 icov:98% qcovs:79.77% e-val:2e-154)	hormone metabolism		1.01505	0.795646	0.288854	1.01844	0.21861	0.236404	1.08251	0.154518		1.01968	0.902409		0.740078	0.416749		0.381687	0.264822		0.898169	0.691585		3.55068	2.36771e-05
>generic|frv2_86230|Pisum_sativum_v2_Contig7092_3	frv2_86230;Q9LSV0	Pisum_sativum_v2_Contig7092_3 Uncharacterized protein n=2 Tax=Soja RepID=I1MKN2_SOYBN (UniRef100_I1MKN2 icov:99% qcovs:90.49% e-val:0)	OPP.oxidative PP.6-phosphogluconate dehydrogenase		0.739326	0.0759586	0.0602118	1.28917	0.0610477	0.119632	1.53	0.0197898		1.15506	0.444294		1.20505	0.21705		0.527675	0.270403		1.65868	0.958485		1.80538	0.0328292
>generic|carvalho17606|PsCam023124_1_AA	B9RAJ0;frv2_82038	PsCam023124_1_AA Probable aspartyl aminopeptidase OS=Ricinus communis GN=RCOM_1506700 PE=2 SV=2 (sp	protein.degradation.aspartate protease		1.22662	0.109396	0.0752146	0.95737	0.638323	0.338541	0.935957	0.989006		0.808383	0.311199		1.05845	0.540506		1.87178	0.270533		1.48153	0.835986		1.52709	0.178327
>generic|frv2_52817|franssen_32750_2	frv2_52817;frv2_101914	franssen_32750_2 Uncharacterized protein n=1 Tax=Medicago truncatula RepID=A0A072TCT6_MEDTR (UniRef100_A0A072TCT6 icov:90% qcovs:91.2% e-val:5e-148)	stress.abiotic.unspecified		0.948253	0.593493	0.23624	1.0761	0.478057	0.302738	0.684249	0.499211		0.596003	0.99414		1.06781	0.630235		0.508846	0.270753		2.04123	0.964504		2.7905	0.0277012
>generic|carvalho9852|PsCam006606_1_AA	P54774;frv2_113559;frv2_49324	PsCam006606_1_AA Cell division cycle protein 48 homolog OS=Glycine max GN=CDC48 PE=2 SV=1 (sp	cell.division		1.14812	0.305359	0.145548	0.263429	0.245636	0.249357	0.0190373	0.426321		0.272428	0.0169414		0.995884	0.952939		1.35607	0.271796		0.0575948	0.895527		0.428592	0.0118827
>generic|frv2_74018|Pisum_sativum_v2_Contig152_3	frv2_74018	Pisum_sativum_v2_Contig152_3 PREDICTED: 40S ribosomal protein S16-like isoform X1 n=3 Tax=Cicer arietinum RepID=UPI00032A4DDF (UniRef100_UPI00032A4DDF icov:99% qcovs:93.66% e-val:4e-92)	protein.synthesis.ribosomal protein.eukaryotic.40S subunit.S16		0.751436	0.119391	0.0791057	0.894207	0.212175	0.234851	0.472274	0.162539		0.821118	0.229888		1.43418	0.191897		2.42458	0.27704		0.943305	0.0486383		1.1979	0.817772		X
>generic|frv2_54007|franssen_33544_3	frv2_54007	franssen_33544_3 PREDICTED: proliferation-associated protein 2G4-like isoform X2 n=1 Tax=Cicer arietinum RepID=UPI00032A78C2 (UniRef100_UPI00032A78C2 icov:99% qcovs:93.83% e-val:0)	protein.degradation		0.98849	0.78171	0.285484	1.42371	0.773501	0.366768	0.823614	0.898023		0.942448	0.104651		0.946887	0.688403		0.711465	0.277296		0.869866	0.303021		1.30481	0.140131		X
>generic|frv2_43363|franssen_26581_3	frv2_43363	franssen_26581_3 Cytochrome b5-like heme/steroid-binding domain protein n=3 Tax=Medicago truncatula RepID=I3SGW0_MEDTR (UniRef100_I3SGW0 icov:99% qcovs:92.48% e-val:8e-88)	redox.misc		0.790071	0.192233	0.104561	0.10718	0.542602	0.317689	2.12432	0.168804		0.843557	0.0607579		1.18855	0.165588		0.475226	0.278712		0.902676	0.465456		0.910405	0.098299		X
>generic|frv2_84444|Pisum_sativum_v2_Contig6197_3	frv2_84444	Pisum_sativum_v2_Contig6197_3 2-nitropropane dioxygenase-like protein n=1 Tax=Medicago truncatula RepID=G7J9Z8_MEDTR (UniRef100_G7J9Z8 icov:97% qcovs:91.29% e-val:0)	misc.misc2		0.870722	0.280219	0.136667	0.302871	0.198194	0.228319	1.14467	0.162414		1.16935	0.17382		1.21048	0.450312		0.272672	0.281591		1.31904	0.875686		2.12962	0.0399		X
>generic|frv2_110775|p.sativum_wa1_contig17349_5	frv2_110775;frv2_80367;frv2_55530	p.sativum_wa1_contig17349_5 PREDICTED: caffeic acid 3-O-methyltransferase-like n=1 Tax=Cicer arietinum RepID=UPI00032AA95F (UniRef100_UPI00032AA95F icov:96% qcovs:91.78% e-val:0)	misc.O-methyl transferases		1.15882	0.176919	0.0994026	1.17597	0.0566064	0.114894	0.451191	0.0796579		1.48255	0.447055		0.966542	0.790079		0.370499	0.282474		0.941762	0.400723		1.88394	0.339539
>generic|frv2_75164|Pisum_sativum_v2_Contig901_4	frv2_75164;frv2_49904;frv2_90540;frv2_47577;frv2_127997;frv2_52735;P93087;Q7DMP0	Pisum_sativum_v2_Contig901_4 Putative uncharacterized protein (Fragment) n=1 Tax=Amblyomma maculatum RepID=G3MHB1_9ACAR (UniRef100_G3MHB1 icov:100% qcovs:98.68% e-val:1e-102)	signalling.calcium		0.930826	0.693881	0.263445	3.78683	0.391906	0.293257	0.174126	0.265972		1.21924	0.141051		1.06478	0.785934		0.315946	0.283429		0.522301	0.490719		3.72803	0.300894
>generic|frv2_47755|franssen_29289_5	frv2_47755;frv2_114180;P93836;frv2_47757	franssen_29289_5 PREDICTED: 4-hydroxyphenylpyruvate dioxygenase-like n=1 Tax=Cicer arietinum RepID=UPI00032A9592 (UniRef100_UPI00032A9592 icov:85% qcovs:86.32% e-val:0)	secondary metabolism.isoprenoids.tocopherol biosynthesis.hydroxyphenylpyruvate dioxygenase		1.16833	0.242517	0.120579	0.974115	0.358789	0.286797	0.155405	0.331848		0.967335	0.204264		0.912711	0.509935		0.503572	0.286789		0.423747	0.469599		2.92493	0.0323021
>generic|frv2_77672|Pisum_sativum_v2_Contig2618_3	frv2_77672;frv2_54371;Q9P305;A8MB38;frv2_83145	Pisum_sativum_v2_Contig2618_3 PREDICTED: uncharacterized protein LOC101505833 n=1 Tax=Cicer arietinum RepID=UPI00032AA532 (UniRef100_UPI00032AA532 icov:99% qcovs:72.12% e-val:3e-72)	not assigned.unknown		0.716433	0.178362	0.0996658	0.605776	0.632028	0.338541	0.110028	0.922424		1.62922	0.0702086		1.06938	0.754565		0.267171	0.287645		1.96196	0.561205		3.12971	0.00266647
>generic|frv2_90337|Pisum_sativum_v1_Contig1743_2	frv2_90337	Pisum_sativum_v1_Contig1743_2 Nucleoside diphosphate kinase 1 n=1 Tax=Pisum sativum RepID=NDK1_PEA (UniRef100_P47922 icov:95% qcovs:100% e-val:1e-103)	nucleotide metabolism.phosphotransfer and pyrophosphatases.nucleoside diphosphate kinase		0.932261	0.22474	0.115758	0.117349	0.283098	0.266147	0.668756	0.895001		0.877349	0.000791864		0.954963	0.745661		0.481465	0.290901		0.910673	0.85122		1.06716	0.227219		X
>generic|frv2_74036|Pisum_sativum_v2_Contig165_4	frv2_74036;frv2_106889;frv2_30930;frv2_79480;frv2_32791;frv2_32832	Pisum_sativum_v2_Contig165_4 Dehydrin-cognate n=1 Tax=Pisum sativum RepID=Q43430_PEA (UniRef100_Q43430 icov:95% qcovs:99.08% e-val:9e-142)	not assigned.unknown		0.711192	0.0975015	0.0693984	0.458932	0.0639453	0.122266	2.79461	0.0607487		1.71701	0.262318		0.98089	0.917674		0.315726	0.290906		2.17012	0.979611		4.88668	0.0100851
>generic|frv2_83904|Pisum_sativum_v2_Contig5923_1	frv2_83904;P83373;frv2_49081;frv2_49080	Pisum_sativum_v2_Contig5923_1 PREDICTED: malate dehydrogenase, mitochondrial-like n=1 Tax=Cicer arietinum RepID=UPI00032A60C9 (UniRef100_UPI00032A60C9 icov:89% qcovs:93.04% e-val:0)	TCA / org transformation.TCA.malate DH		1.00149	0.981779	0.332067	1.871	0.773934	0.366768	0.780124	0.674387		1.06596	0.317997		1.15052	0.249643		1.36775	0.291474		0.893532	0.0712206		0.763017	0.0755571
>generic|frv2_83017|Pisum_sativum_v2_Contig5481_1	frv2_83017;frv2_46496	Pisum_sativum_v2_Contig5481_1 Eukaryotic translation initiation factor n=1 Tax=Medicago truncatula RepID=G7KRJ1_MEDTR (UniRef100_G7KRJ1 icov:99% qcovs:98.3% e-val:0)	protein.synthesis.initiation		0.573589	0.129222	0.0819041	0.901133	0.291558	0.27021	0.382573	0.262336		0.678668	0.135387		1.0287	0.907253		0.411845	0.294144		1.04826	0.4763		1.71574	0.341079
>generic|frv2_98842|p.sativum_wa1_contig07041_2	frv2_98842;frv2_98840	p.sativum_wa1_contig07041_2 Eukaryotic translation initiation factor 3 subunit D n=1 Tax=Medicago truncatula RepID=A0A072U5R5_MEDTR (UniRef100_A0A072U5R5 icov:99% qcovs:93.94% e-val:0)	protein.synthesis.initiation		0.91979	0.5563	0.224549	1.54049	0.463668	0.302738	1.47607	0.361802		1.00167	0.0736879		0.894103	0.328018		0.580826	0.295656		1.01241	0.969325		2.06146	0.342762
>generic|frv2_48705|franssen_29919_4	frv2_48705;frv2_84403	franssen_29919_4 PREDICTED: succinate dehydrogenase [ubiquinone] iron-sulfur subunit 2, mitochondrial-like n=1 Tax=Cicer arietinum RepID=UPI00032A6176 (UniRef100_UPI00032A6176 icov:89% qcovs:94.27% e-val:0)	TCA / org transformation.TCA.succinate dehydrogenase		0.897579	0.477293	0.200301	0.998224	0.534942	0.316958	0.775641	0.427122		0.989242	0.69656		1.01129	0.943366		0.52101	0.296676		0.78515	0.818066		1.60558	0.232188
>generic|frv2_71564|franssen_44249_1	frv2_71564;frv2_95903;O82179;frv2_89392	franssen_44249_1 2-oxo acid dehydrogenase, lipoyl-binding site n=1 Tax=Medicago truncatula RepID=Q2MGQ2_MEDTR (UniRef100_Q2MGQ2 icov:98% qcovs:88.71% e-val:1e-74)	PS.photorespiration.glycine cleavage.H protein		0.720776	0.0825559	0.0634018	1.96459	0.111737	0.170751	6.91083	0.0757105		1.60126	0.665172		0.880042	0.482517		0.385099	0.298721		2.76687	0.643024		14.6795	0.358943
>generic|frv2_112301|p.sativum_wa1_contig19188_6	frv2_112301;Q71VM4	p.sativum_wa1_contig19188_6 PREDICTED: importin subunit alpha-like n=1 Tax=Cicer arietinum RepID=UPI00032AC19F (UniRef100_UPI00032AC19F icov:99% qcovs:92.09% e-val:0)	protein.targeting.nucleus		1.67405	0.0525217	0.0469743	0.58162	0.365357	0.286797	1.81288	0.715733		0.824263	0.79129		1.01655	0.93416		1.90923	0.301434		1.29998	0.665698		0.902914	0.0540081
>generic|frv2_84675|Pisum_sativum_v2_Contig6313_2	frv2_84675;frv2_67513	Pisum_sativum_v2_Contig6313_2 Indole-3-acetate O-methyltransferase-like protein n=1 Tax=Medicago truncatula RepID=A0A072UXX4_MEDTR (UniRef100_A0A072UXX4 icov:95% qcovs:92.67% e-val:0)	hormone metabolism.auxin.synthesis-degradation		0.580843	0.365151	0.166984	1.15317	0.125226	0.182892	0.182681	0.0988225		0.395806	0.627072		0.998947	0.996362		0.447477	0.301741		1.52388	0.93043		2.82894	0.15331
>generic|frv2_50034|franssen_30824_5	frv2_50034;frv2_111885;Q56ZZ7	franssen_30824_5 Sugar porter (SP) family MFS transporter n=1 Tax=Medicago truncatula RepID=A0A072U7Q1_MEDTR (UniRef100_A0A072U7Q1 icov:96% qcovs:91.89% e-val:1e-162)	major CHO metabolism.degradation.starch.transporter		0.240794	0.051384	0.0469142	1.6495	0.634375	0.338541	0.156706	0.291186		0.994547	0.0647454		0.706049	0.285345		0.470921	0.302177		0.748448	0.645382		1.81641	0.370992
>generic|frv2_105441|p.sativum_wa1_contig13285_6	frv2_105441	p.sativum_wa1_contig13285_6 Subtilisin-like serine protease n=1 Tax=Medicago truncatula RepID=G7IU18_MEDTR (UniRef100_G7IU18 icov:99% qcovs:79.38% e-val:0)	protein.degradation.subtilases		0.555732	0.441941	0.18983	1.91432	0.536191	0.31722	0.70696	0.0197807		0.685244	0.039076		1.10889	0.651479		0.366965	0.307728		1.88899	0.632774		1.73271	0.219786		X
>generic|frv2_91939|FG538867_4	frv2_91939	FG538867_4 PREDICTED: cytochrome P450 71A1-like n=1 Tax=Cicer arietinum RepID=UPI00032AC44B (UniRef100_UPI00032AC44B icov:66% qcovs:72.94% e-val:3e-79)	misc.cytochrome P450		1.14242	0.354012	0.16331	1.01103	0.439678	0.300168	0.681644	0.291911		1.14255	0.770704		1.09426	0.416447		0.387248	0.316565		0.441154	0.565167		0.655137	0.0230958		X
>generic|frv2_129189|p.sativum_wa1_contig31389_4	frv2_129189	p.sativum_wa1_contig31389_4 Late embryogenesis abundant protein group 3 protein n=1 Tax=Medicago truncatula RepID=A0A072UH01_MEDTR (UniRef100_A0A072UH01 icov:92% qcovs:75.33% e-val:1e-63)	not assigned.unknown		0.915885	0.533875	0.21808	0.308296	0.0956404	0.153504	0.509306	3.36371e-05		1.1665	0.0290101		0.762975	0.310848		0.0868095	0.317797		1.91676	0.237912		1.12249	0.0219012		X
>generic|frv2_58916|franssen_36544_5	frv2_58916	franssen_36544_5 Caffeic acid O-methyltransferase n=1 Tax=Medicago truncatula RepID=A0A072VA70_MEDTR (UniRef100_A0A072VA70 icov:92% qcovs:90.55% e-val:1e-170)	misc.O-methyl transferases		1.00397	0.949215	0.323186	1.93585	0.408901	0.298048	0.0669324	0.357374		1.19915	0.145942		1.14844	0.677768		0.333239	0.318313		0.885658	0.86456		1.01434	0.0538487		X
>generic|frv2_88856|Pisum_sativum_v2_Contig8402_5	frv2_88856;Q8CXD9;C7Z274	Pisum_sativum_v2_Contig8402_5 PREDICTED: uncharacterized protein LOC101513321 n=1 Tax=Cicer arietinum RepID=UPI00032A8C91 (UniRef100_UPI00032A8C91 icov:80% qcovs:76.09% e-val:1e-37)	not assigned.unknown		0.666588	0.0521639	0.0469743	0.340025	0.0727451	0.131309	2.9187	0.00153464		1.99155	0.169743		0.708605	0.236418		0.14848	0.329597		1.52449	0.406093		13.0384	0.0114746
>generic|frv2_117225|p.sativum_wa1_contig23263_6	frv2_117225;frv2_53456	p.sativum_wa1_contig23263_6 Uncharacterized protein n=1 Tax=Medicago truncatula RepID=I3SE47_MEDTR (UniRef100_I3SE47 icov:93% qcovs:81.94% e-val:3e-157)	RNA.RNA binding		0.868634	0.152827	0.0901084	0.810228	0.296977	0.27021	0.831828	0.227042		1.00002	0.093452		0.829508	0.312498		0.559241	0.332427		0.674465	0.166567		0.973062	0.0238944
>generic|frv2_111762|p.sativum_wa1_contig18684_6	frv2_111762	p.sativum_wa1_contig18684_6 ADP-glucose pyrophosphorylase n=1 Tax=Pisum sativum RepID=Q43819_PEA (UniRef100_Q43819 icov:99% qcovs:100% e-val:0)	major CHO metabolism.synthesis.starch.AGPase		0.930572	0.192647	0.1046	1.03778	0.514337	0.308887	0.497278	0.0935833		0.838619	0.0304409		1.11441	0.293107		1.5675	0.334073		0.750015	0.174446		1.89867	0.0507551		X
>generic|carvalho38222|PsCam055019_1_AA	frv2_1190;frv2_1174;frv2_1178;frv2_1170;frv2_74008;P93354;frv2_93175;frv2_98603;frv2_1180;frv2_74010;frv2_45884;Q1S9I9;frv2_129697;frv2_74845;frv2_74364;frv2_45864;frv2_95252;frv2_97473;frv2_97471;frv2_45894;frv2_45873;frv2_131077;frv2_47892;frv2_45871;frv2_131401;frv2_45868;frv2_132413;frv2_1158;frv2_76270;frv2_50199;frv2_4266;frv2_74441;frv2_47890;frv2_90477;frv2_129031;frv2_1176;frv2_74847;frv…	franssen_701_2 Histone H2B n=1 Tax=Cucumis sativus RepID=A0A0A0KHC9_CUCSA (UniRef100_A0A0A0KHC9 icov:92% qcovs:96.33% e-val:3e-63)	DNA.synthesis/chromatin structure.histone.core.H2A		0.954831	0.705348	0.265356	1.14158	nan	nan	1.92696	0.30035		0.70337	0.750131		1	nan		0.602646	0.334697		0.593252	0.138655		0.751657	0.480468
>generic|frv2_55047|franssen_34214_5	frv2_55047;frv2_84596	franssen_34214_5 PREDICTED: NADH-cytochrome b5 reductase-like protein-like n=1 Tax=Cicer arietinum RepID=UPI00032A64F2 (UniRef100_UPI00032A64F2 icov:99% qcovs:92% e-val:0)	redox.misc		0.981502	0.85778	0.302463	2.62221	0.138151	0.193212	0.162959	0.10145		1.60781	0.0134729		1.31124	0.104207		0.428586	0.335911		1.08126	0.523384		2.21808	0.13036
>generic|carvalho16839|PsCam021768_1_AA	Q9FKE9	PsCam021768_1_AA Protein ROOT HAIR DEFECTIVE 3 homolog 2 OS=Arabidopsis thaliana GN=At5g45160 PE=2 SV=1 (sp	development.unspecified		0.675776	0.45502	0.193067	1.24044	0.478023	0.302738	0.0125534	0.461093		0.111077	0.39724		0.627178	0.190089		0.472063	0.336306		0.0188214	0.972428		0.118019	0.545471		X
>generic|frv2_114080|p.sativum_wa1_contig20767_4	frv2_114080	p.sativum_wa1_contig20767_4 Anthocyanin 5-aromatic acyltransferase n=1 Tax=Medicago truncatula RepID=A0A072VAG9_MEDTR (UniRef100_A0A072VAG9 icov:99% qcovs:74.9% e-val:0)	secondary metabolism.flavonoids.anthocyanins.anthocyanin 5-aromatic acyltransferase		0.918444	0.299723	0.143667	0.614869	0.642368	0.338541	0.69782	0.437592		0.779839	0.0107647		0.924665	0.351815		0.576374	0.339888		1.31053	0.0588364		1.58587	0.00133838		X
>generic|carvalho34081|PsCam048997_1_AA	Q8TB22;frv2_102721	PsCam048997_1_AA Spermatogenesis-associated protein 20 OS=Homo sapiens GN=SPATA20 PE=2 SV=3 (sp	not assigned.unknown		0.835635	0.151107	0.0900104	0.166294	0.821354	0.377034	1.06058	0.849353		0.997705	0.142869		0.898578	0.34717		0.540255	0.34072		1.52141	0.490723		3.6125	0.0659574
>generic|frv2_50098|franssen_30871_1	frv2_50098;frv2_81335	franssen_30871_1 PREDICTED: pyrophosphate--fructose 6-phosphate 1-phosphotransferase subunit alpha-like isoform X1 n=1 Tax=Cicer arietinum RepID=UPI00032A70F5 (UniRef100_UPI00032A70F5 icov:97% qcovs:95.78% e-val:0)	glycolysis.cytosolic branch.pyrophosphate-fructose-6-P phosphotransferase		1.41108	0.239301	0.119822	1.73919	0.333034	0.27944	0.507926	0.284276		0.452498	0.0309466		1.28869	0.273525		0.452773	0.34232		0.379428	0.223551		1.42935	0.893614
>generic|frv2_110994|p.sativum_wa1_contig17920_6	frv2_110994	p.sativum_wa1_contig17920_6 Starch branching protein I n=1 Tax=Lens culinaris RepID=X5CRZ1_LENCU (UniRef100_X5CRZ1 icov:98% qcovs:95.05% e-val:0)	major CHO metabolism.synthesis.starch.starch branching		0.94092	0.787348	0.287201	1.43606	0.637839	0.338541	1.10996	0.459588		0.626951	0.195471		0.991529	0.984831		0.547669	0.346288		2.38785	0.715329		1.76408	0.0695824		X
>generic|frv2_51764|franssen_32028_5	frv2_51764;frv2_111517	franssen_32028_5 PREDICTED: T-complex protein 1 subunit beta-like isoform X2 n=1 Tax=Cicer arietinum RepID=UPI00032AACF7 (UniRef100_UPI00032AACF7 icov:95% qcovs:97.34% e-val:0)	protein.folding		0.961042	0.546017	0.221564	1.71437	0.0947525	0.153504	1.041	0.333035		0.967558	0.00669818		1.0464	0.737962		0.676665	0.348803		1.34405	0.676855		3.01124	0.190729
>generic|frv2_101814|p.sativum_wa1_contig10029_6	frv2_101814	p.sativum_wa1_contig10029_6 Heat shock protein 81-2 n=1 Tax=Medicago truncatula RepID=G7K4R2_MEDTR (UniRef100_G7K4R2 icov:97% qcovs:96.88% e-val:0)	stress.abiotic.heat		0.746461	0.380535	0.171169	1.92495	0.493538	0.305258	0.755774	0.158421		0.846014	0.0569501		0.917866	0.65557		0.510202	0.349285		0.475565	0.732569		1.9769	0.39594		X
>generic|frv2_49115|franssen_30197_4	frv2_49115;frv2_5917;frv2_80426;Q28CY2	franssen_30197_4 Eukaryotic translation initiation factor 3 subunit G n=1 Tax=Medicago truncatula RepID=G7LE61_MEDTR (UniRef100_G7LE61 icov:94% qcovs:92.04% e-val:0)	protein.synthesis.initiation		2.20679	0.0802539	0.0623282	2.29571	0.66965	0.342516	0.622688	0.795162		1.47448	0.388578		0.421605	0.0617857		0.478279	0.350235		1	0.166758		3.70232	0.299549
>generic|frv2_77860|Pisum_sativum_v2_Contig2726_6	frv2_77860;P52427;frv2_104988	Pisum_sativum_v2_Contig2726_6 Proteasome subunit alpha type n=1 Tax=Medicago truncatula RepID=G7K595_MEDTR (UniRef100_G7K595 icov:93% qcovs:99.2% e-val:0)	protein.degradation.ubiquitin.proteasom		1.09041	0.13576	0.0846492	1.33718	0.90989	0.398709	0.6796	0.120494		0.603108	0.16443		1.01154	0.851087		0.630323	0.352322		0.671208	0.80864		0.633179	0.150682
>generic|frv2_76509|Pisum_sativum_v2_Contig1892_5	frv2_76509;frv2_33050;frv2_32609;mut40	Pisum_sativum_v2_Contig1892_5 60S ribosomal protein L27 n=1 Tax=Medicago truncatula RepID=B7FH51_MEDTR (UniRef100_B7FH51 icov:91% qcovs:96.3% e-val:3e-86)	protein.synthesis.ribosomal protein.eukaryotic.60S subunit.L27		1.28028	0.113688	0.0771599	0.214133	0.462894	0.302738	5.16597	0.562453		0.82271	0.666271		1.23827	0.356104		1.51995	0.352333		1.57402	0.731511		3.30661	0.0626417
>generic|frv2_48293|franssen_29638_2	frv2_48293;frv2_102298	franssen_29638_2 PREDICTED: probable 26S proteasome non-ATPase regulatory subunit 6-like isoform X2 n=1 Tax=Cicer arietinum RepID=UPI00032A7188 (UniRef100_UPI00032A7188 icov:98% qcovs:97.14% e-val:0)	protein.degradation.ubiquitin.proteasom		1.01402	0.878823	0.307059	1.34383	0.313256	0.274241	1.31578	0.415558		2.89087	0.0915281		0.867554	0.287724		0.450101	0.355363		2.66702	0.962987		2.62567	0.230736
>generic|frv2_111133|p.sativum_wa1_contig18070_6	frv2_111133;frv2_54636	p.sativum_wa1_contig18070_6 Dihydrolipoyl dehydrogenase, mitochondrial n=1 Tax=Pisum sativum RepID=DLDH_PEA (UniRef100_P31023 icov:95% qcovs:100% e-val:0)	TCA / org transformation.TCA.pyruvate DH.E3		0.986626	0.819185	0.292213	1.74145	0.180363	0.220351	1.56834	0.00305701		0.817571	0.120894		1.12692	0.172409		0.837798	0.356359		0.955996	0.620818		2.16142	0.182342
>generic|carvalho29152|PsCam041224_1_AA	Q9QYJ4	PsCam041224_1_AA ATP-binding cassette sub-family B member 9 OS=Rattus norvegicus GN=Abcb9 PE=1 SV=1 (sp	not assigned.unknown		0.871295	0.325549	0.153409	0.414124	0.462218	0.302738	0.140364	0.0648211		1.2127	0.0339207		0.947083	0.647704		0.117681	0.359431		0.752156	0.51513		1.60739	5.63982e-06		X
>generic|frv2_116057|p.sativum_wa1_contig22370_5	frv2_116057	p.sativum_wa1_contig22370_5 Auxin-binding protein ABP19b n=1 Tax=Medicago truncatula RepID=G7IPZ2_MEDTR (UniRef100_G7IPZ2 icov:98% qcovs:60.47% e-val:1e-79)	stress.abiotic.unspecified		0.785606	0.413786	0.181599	1.50053	0.0605565	0.119632	3.18823	0.00993151		1.26003	0.0322069		1.28159	0.0903457		0.661052	0.369516		1.33987	0.174791		1.50378	0.89158		X
>generic|carvalho12222|PsCam010973_1_AA	Q9FJD4	PsCam010973_1_AA Importin subunit beta-1 OS=Arabidopsis thaliana GN=KPNB1 PE=1 SV=1 (sp	protein.targeting.nucleus		1.07161	0.740713	0.27543	0.474188	0.357065	0.286797	1.60756	0.567743		1.29521	0.0213793		1.2757	0.0866308		0.219365	0.369901		1.9058	0.462703		3.22096	0.132138		X
>generic|frv2_53557|franssen_33257_6	frv2_53557;frv2_105245;frv2_105247;frv2_10445;O49818	franssen_33257_6 Lactoylglutathione lyase n=2 Tax=Medicago truncatula RepID=A0A072UKQ3_MEDTR (UniRef100_A0A072UKQ3 icov:99% qcovs:85.78% e-val:3e-135)	amino acid metabolism.degradation.aspartate family.threonine		1.26218	0.106721	0.0740704	0.420892	0.690778	0.344163	1.88403	0.645878		0.935018	0.0107685		0.835508	0.312051		0.590328	0.370714		2.05809	0.234027		6.92142	0.105253
>generic|frv2_117229|p.sativum_wa1_contig23267_6	frv2_117229;frv2_4817;P80299	p.sativum_wa1_contig23267_6 Epoxide hydrolase n=2 Tax=Medicago truncatula RepID=G7KXL9_MEDTR (UniRef100_G7KXL9 icov:94% qcovs:86.56% e-val:0)	misc.misc2		1.05817	0.456674	0.193501	0.885498	0.117691	0.175117	0.595224	0.880737		0.563387	0.142465		1.0165	0.891457		0.510872	0.373058		0.581984	0.381989		0.398026	0.763453
>generic|carvalho28923|PsCam040871_1_AA	Q28IG6	PsCam040871_1_AA Serine/threonine-protein phosphatase 4 regulatory subunit 2 OS=Xenopus tropicalis GN=ppp4r2 PE=2 SV=1 (sp	not assigned.unknown		0.59144	0.106537	0.0740704	3.85605	0.459774	0.302738	0.39314	0.451623		0.79187	0.15994		0.624989	0.110473		0.413242	0.373901		0.905943	0.519979		1.0929	0.00417212		X
>generic|frv2_113808|p.sativum_wa1_contig20538_5	frv2_113808;Q6AXS5	p.sativum_wa1_contig20538_5 Transcription factor n=1 Tax=Vicia faba var. minor RepID=O04237_VICFA (UniRef100_O04237 icov:96% qcovs:89.19% e-val:0)	RNA.RNA binding		0.972359	0.622562	0.243036	1.43519	0.883016	0.39446	1.58659	0.711693		0.705214	0.524246		0.676023	0.114115		0.198297	0.373901		1.12422	0.971385		1.8061	0.00743137
>generic|carvalho5890|PsCam000386_1_AA	Q8N0X7;frv2_106845	PsCam000386_1_AA Spartin OS=Homo sapiens GN=SPG20 PE=1 SV=1 (sp	development.unspecified		1	nan	nan	3.78276	0.507882	0.307869	0.124085	0.373901		1.10799	0.00626779		1.17904	0.122713		0.439738	0.373901		1.02771	0.170592		2.53394	0.000302025
>generic|frv2_85703|Pisum_sativum_v2_Contig6828_5	frv2_85703	Pisum_sativum_v2_Contig6828_5 PREDICTED: eukaryotic translation initiation factor 6-2-like n=1 Tax=Cicer arietinum RepID=UPI00032ABDDD (UniRef100_UPI00032ABDDD icov:86% qcovs:97.14% e-val:8e-173)	protein.synthesis.ribosome biogenesis.Pre-rRNA processing and modifications.misc		0.873826	0.196666	0.106593	1.64978	0.183703	0.222349	0.878318	0.297706		0.996439	0.0974244		0.871656	0.126897		0.436755	0.373901		1.02606	0.131566		2.11916	0.000453597		X
>generic|frv2_46471|franssen_28504_1	frv2_46471	franssen_28504_1 Translation elongation factor EF-2 subunit n=1 Tax=Medicago truncatula RepID=A0A072VT43_MEDTR (UniRef100_A0A072VT43 icov:99% qcovs:97.24% e-val:0)	protein.synthesis.elongation		0.700056	0.144432	0.0871786	1.26135	0.483851	0.304459	0.127237	0.349055		0.213012	0.597037		0.846857	0.160665		2.49006	0.373901		0.368866	2.96032e-05		1.13394	0.0459189		X
>generic|frv2_78754|Pisum_sativum_v2_Contig3272_4	frv2_78754;frv2_51985;carvalho19111	Pisum_sativum_v2_Contig3272_4 PREDICTED: papilin-like n=1 Tax=Cicer arietinum RepID=UPI00032AB089 (UniRef100_UPI00032AB089 icov:68% qcovs:58.7% e-val:1e-56)	not assigned.unknown		0.775594	0.472986	0.199586	1.13313	0.925753	0.403976	0.628882	0.551123		0.931033	0.223864		0.726719	0.164219		0.289867	0.373901		1.06459	0.652586		1.26062	0.0179904
>generic|frv2_110543|p.sativum_wa1_contig17013_6	frv2_110543;D4GYE3	p.sativum_wa1_contig17013_6 Transmembrane protein, putative n=1 Tax=Medicago truncatula RepID=A0A072U544_MEDTR (UniRef100_A0A072U544 icov:90% qcovs:79.65% e-val:1e-92)	not assigned.unknown		0.538721	0.0593821	0.0513149	1.97889	0.65698	0.34243	0.502813	0.47956		0.740877	0.980064		0.569646	0.164473		0.346345	0.373901		0.405864	0.275071		1.8134	0.162507
>generic|frv2_109459|p.sativum_wa1_contig16266_6	frv2_109459	p.sativum_wa1_contig16266_6 Phosphopantetheine adenylyltransferase n=1 Tax=Medicago truncatula RepID=G7KEY2_MEDTR (UniRef100_G7KEY2 icov:97% qcovs:90.29% e-val:1e-112)	Co-factor and vitamine metabolism.pantothenate.pantetheine-phosphate adenylyltransferase (PPAT)		0.777418	0.318809	0.151162	2.36398	0.569106	0.327239	0.342539	0.471863		0.730577	0.506833		1.21084	0.192102		0.527314	0.373901		1.50301	0.743071		0.730333	3.19823e-05		X
>generic|carvalho6431|PsCam001179_1_AA	P36428;frv2_83719	PsCam001179_1_AA Alanine--tRNA ligase OS=Arabidopsis thaliana GN=ALATS PE=1 SV=3 (sp	protein.aa activation.alanine-tRNA ligase		0.660588	0.224897	0.115758	2.51599	0.296489	0.27021	0.910885	0.289928		0.939896	0.191436		1.53443	0.303248		0.455285	0.373901		0.189618	0.745116		0.697828	0.0295646
>generic|frv2_116433|p.sativum_wa1_contig22647_5	frv2_116433;Q5R4J9	p.sativum_wa1_contig22647_5 Amino-terminal acetyltransferase, putative n=1 Tax=Medicago truncatula RepID=A0A072VDQ9_MEDTR (UniRef100_A0A072VDQ9 icov:95% qcovs:89.68% e-val:2e-178)	misc.acyl transferases		0.821603	0.217313	0.113809	2.31471	0.486977	0.304627	0.719153	0.498929		0.801241	0.126681		1.18288	0.307038		1.47665	0.373901		0.506994	0.0178048		3.3126	0.0358437
>generic|frv2_81068|Pisum_sativum_v2_Contig4512_3	frv2_81068;frv2_53990;Q9FXA2	Pisum_sativum_v2_Contig4512_3 Polyadenylate-binding protein n=2 Tax=Medicago truncatula RepID=G7J6Y1_MEDTR (UniRef100_G7J6Y1 icov:99% qcovs:92.46% e-val:0)	RNA.processing		1	nan	nan	1.99613	0.546531	0.318576	0.202864	0.373901		0.973487	0.00283203		1.14993	0.347754		0.571128	0.373901		0.977036	0.429036		1.88487	0.000560468
>generic|frv2_9053|franssen_5282_3	frv2_9053;carvalho12121;carvalho10385;carvalho30222;frv2_113818	franssen_5282_3 PREDICTED: DNA ligase 1-like n=1 Tax=Cicer arietinum RepID=UPI00032AAB94 (UniRef100_UPI00032AAB94 icov:98% qcovs:83.33% e-val:2e-107)	not assigned.unknown		0.60274	0.157817	0.0915195	1.69319	0.431826	0.298912	0.543963	0.459837		1	0.00804869		0.865472	0.348526		0.244407	0.373901		0.252569	0.69999		0.833886	0.000322831
>generic|frv2_105137|p.sativum_wa1_contig13053_5	frv2_105137;frv2_79070;frv2_59352;frv2_114339	p.sativum_wa1_contig13053_5 Uncharacterized protein n=1 Tax=Lotus japonicus RepID=I3SPI3_LOTJA (UniRef100_I3SPI3 icov:94% qcovs:78.2% e-val:9e-63)	RNA.RNA binding		0.648418	0.183797	0.101227	0.551888	0.461603	0.302738	0.463797	0.316588		1.02895	0.140375		1.23389	0.365833		1.57872	0.373901		1	0.0409527		1	0.251602
>generic|frv2_114679|p.sativum_wa1_contig21264_4	frv2_114679	p.sativum_wa1_contig21264_4 Phosphoenolpyruvate carboxylase n=1 Tax=Pisum sativum RepID=CAPP_PEA (UniRef100_P51062 icov:100% qcovs:99.39% e-val:0)	glycolysis.cytosolic branch.phospho-enol-pyruvate carboxylase (PEPC)		0.667482	0.116964	0.078515	4.06685	0.436401	0.299484	0.650855	0.373901		0.361246	0.525791		0.86785	0.476398		2.15187	0.373901		1	0.0008367		1	0.589254		X
>generic|frv2_126025|p.sativum_wa1_contig29416_5	frv2_126025	p.sativum_wa1_contig29416_5 Dehydrin 3 n=1 Tax=Pisum sativum RepID=O04118_PEA (UniRef100_O04118 icov:98% qcovs:98.48% e-val:7e-131)	not assigned.unknown		1	nan	nan	2.74802	0.373901	0.286797	0.102836	0.373901		0.206871	0		1.30775	0.665284		0.576791	0.373901		0.133276	0.298247		1.20622	0.0567299		X
>generic|frv2_49716|franssen_30602_3	frv2_49716;frv2_116362;Q9S834	franssen_30602_3 PREDICTED: ATP-dependent Clp protease proteolytic subunit 5, chloroplastic-like n=1 Tax=Cicer arietinum RepID=UPI00032A5F81 (UniRef100_UPI00032A5F81 icov:92% qcovs:85.38% e-val:0)	protein.degradation.serine protease		1.40024	0.100243	0.0708566	0.830864	0.508754	0.307869	0.111908	0.715108		0.300699	0.247901		0.977817	0.916003		0.433648	0.373901		0.0937164	0.41408		0.844115	0.000674049
>generic|frv2_114500|p.sativum_wa1_contig21125_5	frv2_114500;frv2_54413	p.sativum_wa1_contig21125_5 Ubiquitin-associated (UBA)/TS-N domain protein n=1 Tax=Medicago truncatula RepID=G7LHW1_MEDTR (UniRef100_G7LHW1 icov:96% qcovs:94.36% e-val:0)	protein.degradation.ubiquitin		1.03552	0.91909	0.316443	2.09981	0.64266	0.338541	0.299261	0.553148		0.828879	0.296094		0.801607	0.106568		0.588668	0.373901		0.632569	0.272783		0.824892	0.0105419
>generic|carvalho36069|PsCam051413_1_AA	O66911	PsCam051413_1_AA UvrABC system protein A OS=Aquifex aeolicus (strain VF5) GN=uvrA PE=3 SV=1 (sp	not assigned.unknown		1.06678	0.297457	0.143027	0.854478	0.491058	0.305258	0.286722	0.660842		1.04988	0.40737		1.23793	0.232092		0.518822	0.373901		1.02699	0.793894		2.1204	0.00244682		X
>generic|frv2_87882|Pisum_sativum_v2_Contig7913_2	frv2_87882;frv2_49424;frv2_49425;Q13442	Pisum_sativum_v2_Contig7913_2 PREDICTED: 28 kDa heat- and acid-stable phosphoprotein-like n=1 Tax=Cicer arietinum RepID=UPI00032A823A (UniRef100_UPI00032A823A icov:81% qcovs:92.02% e-val:2e-88)	not assigned.unknown		0.978956	0.725762	0.270856	1.3856	0.47358	0.302738	0.746652	0.542327		1.34659	0.268688		0.847517	0.289869		0.317664	0.373901		1.2186	0.955035		2.18688	1.55182e-07
>generic|frv2_40944|franssen_24972_2	frv2_40944;frv2_114932;Q9FKA5	franssen_24972_2 PREDICTED: uncharacterized protein At5g39570-like isoform X1 n=1 Tax=Cicer arietinum RepID=UPI00032AB43A (UniRef100_UPI00032AB43A icov:84% qcovs:61.24% e-val:5e-94)	not assigned.no ontology.glycine rich proteins		0.636887	0.0560126	0.049135	0.82965	0.664528	0.34243	0.738133	0.554668		0.949077	0.597485		0.817942	0.320491		0.443994	0.373901		0.873047	0.209963		1.19821	0.0141573
>generic|carvalho10180|PsCam007054_1_AA	Q9THX6;frv2_103634;frv2_48537;frv2_78577	PsCam007054_1_AA Thylakoid lumenal 29 kDa protein, chloroplastic OS=Solanum lycopersicum GN=CLEB3J9 PE=3 SV=1 (sp	redox.ascorbate and glutathione.ascorbate		0.566034	0.0871394	0.0645698	3.1712	0.367761	0.286797	0.52918	0.376706		0.69119	0.0432472		1.54504	0.329475		0.536051	0.373901		0.899325	0.729911		1.31951	0.122941
>generic|frv2_122363|p.sativum_wa1_contig27027_3	frv2_122363	p.sativum_wa1_contig27027_3 Uncharacterized protein n=1 Tax=Lotus japonicus RepID=I3STI1_LOTJA (UniRef100_I3STI1 icov:98% qcovs:89.37% e-val:5e-170)	hormone metabolism.auxin.induced-regulated-responsive-activated		0.772286	0.475595	0.200134	1.25586	0.709059	0.348621	0.416309	0.537586		1.93007	0.444241		0.726123	0.406801		2.35259	0.373901		1	0.0049539		5.6181	0.893799		X
>generic|frv2_2250|franssen_1323_6	frv2_2250;frv2_125368;frv2_46593;frv2_74428;Q9T0G2;frv2_2246;frv2_46589	franssen_1323_6 Cytochrome c, monohaem n=2 Tax=Medicago truncatula RepID=A2Q5X9_MEDTR (UniRef100_A2Q5X9 icov:97% qcovs:94.52% e-val:3e-44)	mitochondrial electron transport / ATP synthesis.cytochrome c		0.968236	0.180403	0.100258	2.78741	0.429131	0.298912	0.0699445	0.543294		0.893709	0.0940067		0.834759	0.446147		1.39416	0.373901		0.708598	0.00440296		0.780391	0.0918196
>generic|frv2_131440|p.sativum_wa1_contig32674_5	frv2_131440	p.sativum_wa1_contig32674_5 ATP-dependent chaperone ClpB n=1 Tax=Medicago truncatula RepID=A0A072USG1_MEDTR (UniRef100_A0A072USG1 icov:100% qcovs:89.63% e-val:5e-76)	stress.abiotic.heat		0.607782	0.124459	0.0807426	4.71682	0.365132	0.286797	0.0655353	0.365132		0.184309	0.124459		1.35431	0.483123		0.360298	0.373901		0.313355	0.979795		0.24995	0.000517299		X
>generic|frv2_79338|Pisum_sativum_v2_Contig3605_4	frv2_79338;frv2_97601;P93306	Pisum_sativum_v2_Contig3605_4 NADH dehydrogenase subunit 7 (Fragment) n=1 Tax=Amborella trichopoda RepID=V9VFV2_AMBTC (UniRef100_V9VFV2 icov:95% qcovs:98.73% e-val:6e-172)	mitochondrial electron transport / ATP synthesis.NADH-DH.localisation not clear		0.561835	0.119923	0.0791163	0.0476316	0.085489	0.145844	0.562707	0.085489		0.488007	0.119923		0.841107	0.487419		3.1851	0.373901		1.71052	0.00725484		1.04038	0.868139
>generic|frv2_50221|franssen_30958_2	frv2_50221	franssen_30958_2 NADH dehydrogenase [ubiquinone] iron-sulfur protein n=2 Tax=Medicago truncatula RepID=G7ZWQ4_MEDTR (UniRef100_G7ZWQ4 icov:88% qcovs:96.89% e-val:2e-159)	mitochondrial electron transport / ATP synthesis.NADH-DH.localisation not clear		0.626916	0.120495	0.0793229	5.64177	0.0729877	0.131309	0.128559	0.0593339		2.06441	0.00300259		1.19025	0.538589		0.107587	0.373901		0.398181	0.422684		0.7133	0.00303777		X
>generic|frv2_81008|Pisum_sativum_v2_Contig4482_3	frv2_81008;Q8LPJ4	Pisum_sativum_v2_Contig4482_3 PREDICTED: ABC transporter E family member 2-like n=1 Tax=Cicer arietinum RepID=UPI00032A6C11 (UniRef100_UPI00032A6C11 icov:99% qcovs:97.36% e-val:0)	RNA.transcription		1.0351	0.747023	0.27677	1.53197	0.546505	0.318576	0.314517	0.598233		0.21965	0.249116		0.904378	0.619009		2.23456	0.373901		0.82137	0.00494192		1.00328	0.555035
>generic|frv2_121037|p.sativum_wa1_contig26120_6	frv2_121037;frv2_47531;Q9M330	p.sativum_wa1_contig26120_6 PREDICTED: probable proteasome inhibitor-like n=1 Tax=Cicer arietinum RepID=UPI00032A9190 (UniRef100_UPI00032A9190 icov:95% qcovs:89.14% e-val:1e-171)	protein.degradation.ubiquitin.proteasom		1.10676	0.397156	0.17581	0.652859	0.96424	0.414767	1.74981	0.945503		1.33686	0.975734		0.87895	0.652725		0.408464	0.373901		1.82471	0.331543		199.154	0.0496931
>generic|frv2_138074|p.sativum_wa1_contig37222_2	frv2_138074;frv2_44715;frv2_97782;frv2_73751;frv2_44718;frv2_73733;frv2_97780;frv2_76386;O49884	p.sativum_wa1_contig37222_2 Uncharacterized protein n=3 Tax=Soja RepID=I1L7D4_SOYBN (UniRef100_I1L7D4 icov:86% qcovs:100% e-val:3e-24)	protein.synthesis.ribosomal protein.eukaryotic.60S subunit.L30		0.827668	0.485996	0.202886	0.671235	0.728421	0.354355	0.544836	0.438397		0.760371	0.0866139		1.03748	0.835786		1.87123	0.373901		0.772701	0.0091844		1.29026	0.0422786
>generic|carvalho12034|PsCam010748_1_AA	Q42954;frv2_59633;frv2_78155	PsCam010748_1_AA Pyruvate kinase, cytosolic isozyme OS=Nicotiana tabacum PE=2 SV=1 (sp	glycolysis.cytosolic branch.pyruvate kinase (PK)		0.540077	0.125454	0.0807849	4.59852	0.473289	0.302738	0.527352	0.406118		1.08102	0.771365		1.02533	0.905196		2.2687	0.373901		1.34899	0.0127345		1.25319	0.68591
>generic|frv2_48191|franssen_29565_2	frv2_48191;Q94A97;frv2_76565	franssen_29565_2 Uncharacterized protein n=10 Tax=Pentapetalae RepID=C6SZW2_SOYBN (UniRef100_C6SZW2 icov:88% qcovs:100% e-val:4e-107)	protein.degradation.ubiquitin.E2		1.52717	0.180096	0.100258	1.70681	0.74936	0.359939	0.134117	0.560502		0.803454	0.0123991		1.81925	0.106576		0.494888	0.375523		3.4922	0.25316		1.34174	0.468845
>generic|frv2_111051|p.sativum_wa1_contig17972_6	frv2_111051;F4JFN3	p.sativum_wa1_contig17972_6 Heat shock protein 81-2 n=1 Tax=Medicago truncatula RepID=G7KEN6_MEDTR (UniRef100_G7KEN6 icov:97% qcovs:93.32% e-val:0)	stress.abiotic.heat		1.40893	0.156605	0.0913155	1.17203	0.874008	0.391763	0.238192	0.412026		0.396025	0.00156199		1.80712	0.320883		0.582144	0.376144		0.587069	0.126681		1.65343	0.965876
>generic|frv2_78065|Pisum_sativum_v2_Contig2844_1	frv2_78065;frv2_102384;P33731;frv2_64892	Pisum_sativum_v2_Contig2844_1 Signal recognition particle subunit SRP72 n=1 Tax=Medicago truncatula RepID=A0A072TSZ4_MEDTR (UniRef100_A0A072TSZ4 icov:97% qcovs:92.33% e-val:0)	protein.targeting.secretory pathway.unspecified		0.687058	0.233961	0.118456	1.81225	0.537924	0.317522	0.0705415	0.472147		0.705476	0.644509		1.12892	0.586026		0.564649	0.378138		0.251612	0.890868		1.03718	0.0821646
>generic|frv2_74050|Pisum_sativum_v2_Contig175_4	frv2_74050	Pisum_sativum_v2_Contig175_4 Convicilin n=1 Tax=Pisum sativum RepID=Q9M3X6_PEA (UniRef100_Q9M3X6 icov:98% qcovs:100% e-val:0)	development.storage proteins		1.02533	0.736043	0.274359	0.618744	0.217738	0.236404	3.046	0.178624		1.0775	0.269586		0.905289	0.176954		0.598078	0.37879		0.647137	0.324938		0.868843	0.0453688		X
>generic|frv2_85562|Pisum_sativum_v2_Contig6757_6	frv2_85562;frv2_50013	Pisum_sativum_v2_Contig6757_6 PREDICTED: mitochondrial outer membrane protein porin of 36 kDa-like n=1 Tax=Cicer arietinum RepID=UPI00032ABF30 (UniRef100_UPI00032ABF30 icov:93% qcovs:87.68% e-val:3e-176)	transport.porins		0.973475	0.673054	0.25628	1.07479	0.547599	0.318728	3.26144	0.237274		1.37646	0.00807304		1.00697	0.949024		0.573443	0.380888		1.49166	0.35437		1.14987	0.810434
>generic|frv2_88077|Pisum_sativum_v2_Contig8011_2	frv2_88077;P50906;frv2_32739;frv2_39314;frv2_42157	Pisum_sativum_v2_Contig8011_2 Translationally-controlled tumor protein homolog n=2 Tax=Pisum sativum RepID=TCTP_PEA (UniRef100_P50906 icov:93% qcovs:100% e-val:1e-115)	development.unspecified		0.693078	0.0522291	0.0469743	1.52196	0.585133	0.329902	1.49942	0.541011		0.799706	0.127786		0.963847	0.814694		0.568	0.391728		1.41136	0.402143		3.53197	0.0429257
>generic|frv2_59009|franssen_36602_5	frv2_59009;Q8LFQ6	franssen_36602_5 PREDICTED: glutaredoxin-C4-like n=1 Tax=Cicer arietinum RepID=UPI00032A59C8 (UniRef100_UPI00032A59C8 icov:74% qcovs:86.13% e-val:2e-76)	redox.glutaredoxins		0.602911	0.214103	0.11266	2.79807	0.100178	0.157967	0.242023	0.0670701		1.21168	0.678446		1.36113	0.243424		0.561576	0.394216		0.962384	0.634042		2.14532	0.152055
>generic|frv2_112585|p.sativum_wa1_contig19444_3	frv2_112585	p.sativum_wa1_contig19444_3 Glucose-1-phosphate adenylyltransferase n=1 Tax=Pisum sativum RepID=Q43816_PEA (UniRef100_Q43816 icov:99% qcovs:100% e-val:0)	major CHO metabolism.synthesis.starch.AGPase		0.828627	0.0563791	0.049135	1.43392	0.480875	0.303551	0.270349	0.459841		0.603643	0.511121		0.370207	0.150226		0.315869	0.395025		0.667811	0.422772		2.92183	0.373901		X
>generic|carvalho5784|PsCam000249_1_AA	P30184;frv2_81805;frv2_49866	PsCam000249_1_AA Leucine aminopeptidase 1 OS=Arabidopsis thaliana GN=PM25 PE=1 SV=1 (sp	protein.degradation		1.06072	0.507587	0.209856	1.63885	0.416961	0.298912	0.338582	0.642754		0.506128	0.708239		0.888189	0.351917		0.744298	0.398002		0.352081	0.135409		0.441389	0.195906
>generic|frv2_68540|franssen_42257_4	frv2_68540;frv2_118470	franssen_42257_4 Plant/K24M7-17 protein n=1 Tax=Medicago truncatula RepID=G7IES2_MEDTR (UniRef100_G7IES2 icov:98% qcovs:85.35% e-val:1e-93)	not assigned.unknown		1.08478	0.616376	0.24149	1.61286	0.314652	0.274241	0.715592	0.704887		1.00587	0.00784375		1.05983	0.734973		0.294692	0.398736		1.46374	0.531319		1.33539	0.31509
>generic|frv2_48187|franssen_29562_4	frv2_48187;frv2_81178	franssen_29562_4 Heat shock protein 70 n=1 Tax=Medicago sativa RepID=Q5MGA8_MEDSA (UniRef100_Q5MGA8 icov:98% qcovs:96.92% e-val:0)	stress.abiotic.heat		0.837495	0.231287	0.117861	1.41279	0.276578	0.263759	0.593788	0.791765		0.877715	0.0394422		1.25524	0.307015		0.600033	0.400189		0.918786	0.730566		1.62974	0.0469948
>generic|frv2_83281|Pisum_sativum_v2_Contig5615_1	frv2_83281;B9HCR2	Pisum_sativum_v2_Contig5615_1 Methylthioribose-1-phosphate isomerase n=1 Tax=Medicago truncatula RepID=G7IGG7_MEDTR (UniRef100_G7IGG7 icov:98% qcovs:94.05% e-val:0)	protein.synthesis.initiation		0.908242	0.164587	0.0938488	1.13359	0.439871	0.300168	0.76595	0.373038		0.883107	0.111069		1.07961	0.468921		1.54211	0.404618		1.37533	0.0895049		1.37847	0.663024
>generic|carvalho11673|PsCam010163_1_AA	P55844;frv2_96617;frv2_90468;frv2_49475;frv2_74512	PsCam010163_1_AA Probable 60S ribosomal protein L14 OS=Pisum sativum PE=2 SV=1 (sp	protein.synthesis.ribosomal protein.eukaryotic.60S subunit.L14		0.939827	0.327634	0.154155	0.99379	0.134585	0.190924	1.15959	0.106631		0.952107	0.162884		1.01781	0.956388		0.593479	0.404922		0.79281	0.863829		1.63165	0.378517
>generic|frv2_2409|franssen_1417_4	frv2_2409;frv2_32209;frv2_76646;frv2_46659;frv2_74917;frv2_74919	franssen_1417_4 Kunitz-type trypsin inhibitor-like 2 protein n=1 Tax=Pisum sativum RepID=PIP22_PEA (UniRef100_O82711 icov:92% qcovs:89.16% e-val:5e-42)	not assigned.unknown		1	nan	nan	1.56993	0.373901	0.286797	0.616749	0.373901		1.30252	0		1.17515	0.495577		0.335099	0.406405		3.7804	0.346969		2.03467	0.482445
>generic|frv2_103111|p.sativum_wa1_contig11307_1	frv2_103111;frv2_63441	p.sativum_wa1_contig11307_1 PREDICTED: early nodulin-like protein 1-like n=1 Tax=Cicer arietinum RepID=UPI00032A555F (UniRef100_UPI00032A555F icov:96% qcovs:78.38% e-val:3e-94)	misc.plastocyanin-like		1.08941	0.84297	0.298476	0.610362	0.541758	0.317689	0.316637	0.106355		0.934295	0.0340629		1.18174	0.263545		0.818667	0.411253		0.836705	0.0492547		2.42035	0.168917
>generic|frv2_76790|Pisum_sativum_v2_Contig2072_5	frv2_76790;frv2_46145	Pisum_sativum_v2_Contig2072_5 Formate dehydrogenase n=2 Tax=Lotus japonicus RepID=B6VPZ9_LOTJA (UniRef100_B6VPZ9 icov:90% qcovs:91.97% e-val:0)	C1-metabolism.formate dehydrogenase		1.10596	0.10427	0.0730296	1.11034	0.151618	0.19866	1.31091	0.0878006		1.05364	0.882418		0.945245	0.570914		0.638654	0.41231		0.747968	0.104556		0.844741	0.0735823
>generic|frv2_82100|Pisum_sativum_v2_Contig5026_3	frv2_82100;Q9SEE5	Pisum_sativum_v2_Contig5026_3 Galactokinase n=1 Tax=Pisum sativum RepID=Q5ZP80_PEA (UniRef100_Q5ZP80 icov:98% qcovs:99.8% e-val:0)	minor CHO metabolism.galactose.galactokinases		1.21306	0.0748072	0.0599184	1.04603	0.816098	0.376643	5.56332	0.271993		1.16333	0.0587742		1.08747	0.369331		1.34073	0.41426		1.90259	0.71151		2.07511	0.195832
>generic|frv2_52716|franssen_32678_3	frv2_52716;frv2_85900	franssen_32678_3 PREDICTED: proteasome subunit alpha type-3-like n=1 Tax=Cicer arietinum RepID=UPI00032A94D1 (UniRef100_UPI00032A94D1 icov:86% qcovs:97.99% e-val:0)	protein.degradation.ubiquitin.proteasom		0.798808	0.0711246	0.0580293	1.55439	0.39693	0.294997	1.40945	0.0313204		1.28908	0.396719		0.933579	0.735214		0.643965	0.4178		1.50177	0.0702727		2.5943	0.0736116
>generic|frv2_80168|Pisum_sativum_v2_Contig4046_6	frv2_80168;P58684	Pisum_sativum_v2_Contig4046_6 PREDICTED: probable signal peptidase complex subunit 2-like n=1 Tax=Cicer arietinum RepID=UPI00032A8FBE (UniRef100_UPI00032A8FBE icov:96% qcovs:91.85% e-val:1e-118)	protein.targeting.secretory pathway.ER		0.609293	0.0860329	0.0641618	0.884253	0.0709224	0.129782	0.215839	0.0303297		0.734042	0.249989		1.01204	0.963042		0.422671	0.418092		0.939835	0.47403		2.6013	0.694729
>generic|frv2_75689|Pisum_sativum_v2_Contig1333_3	frv2_75689;P46637;frv2_50439	Pisum_sativum_v2_Contig1333_3 Uncharacterized protein n=1 Tax=Medicago truncatula RepID=I3SM21_MEDTR (UniRef100_I3SM21 icov:100% qcovs:93.09% e-val:0)	amino acid metabolism.degradation.glutamate family.arginine		1.17392	0.244703	0.121469	0.844012	0.991148	0.421131	0.584068	0.75226		1.75468	0.49664		0.987675	0.901165		0.594792	0.419309		0.385914	0.352079		2.22176	0.727218
>generic|frv2_81655|Pisum_sativum_v2_Contig4804_1	frv2_81655;frv2_44783	Pisum_sativum_v2_Contig4804_1 Calnexin homolog n=1 Tax=Pisum sativum RepID=CALX_PEA (UniRef100_O82709 icov:98% qcovs:98.37% e-val:0)	signalling.calcium		0.905497	0.185474	0.101786	1.25396	0.350565	0.286797	0.914357	0.205501		1.09057	0.0144564		1.03012	0.782966		0.424954	0.420145		0.775846	0.374205		0.763873	0.639971
>generic|frv2_74987|Pisum_sativum_v2_Contig770_5	frv2_74987;frv2_76732;frv2_4235;frv2_47109;O65743;frv2_47866;frv2_4236;frv2_3132;frv2_3125;frv2_95363;frv2_74984;frv2_97869;frv2_95361;frv2_74988;frv2_95359	Pisum_sativum_v2_Contig770_5 60S ribosomal protein L24-2 n=1 Tax=Medicago truncatula RepID=Q1SN35_MEDTR (UniRef100_Q1SN35 icov:91% qcovs:96.95% e-val:6e-106)	protein.synthesis.ribosomal protein.eukaryotic.60S subunit.L24		0.712082	0.337615	0.157184	2.75657	0.636912	0.338541	0.296244	0.471855		0.970613	0.838301		1.3579	0.297842		1.79515	0.420803		0.817133	0.232047		0.654092	0.641172
>generic|frv2_89578|Pisum_sativum_v2_Contig8768_6	frv2_89578	Pisum_sativum_v2_Contig8768_6 Glutathione reductase, cytosolic n=1 Tax=Pisum sativum RepID=GSHRC_PEA (UniRef100_Q43621 icov:90% qcovs:100% e-val:0)	redox.ascorbate and glutathione.glutathione		1.09848	0.219403	0.114079	0.14768	0.856791	0.387556	0.763619	0.290583		1.03273	0.906896		1.0646	0.458218		0.606267	0.423931		0.814244	0.419592		0.647349	0.715776		X
>generic|frv2_49662|franssen_30562_5	frv2_49662;frv2_83614	franssen_30562_5 PREDICTED: pyruvate dehydrogenase E1 component subunit beta, mitochondrial-like n=1 Tax=Cicer arietinum RepID=UPI00032AA4D9 (UniRef100_UPI00032AA4D9 icov:94% qcovs:95.56% e-val:0)	TCA / org transformation.TCA.pyruvate DH.E1		1.19695	0.0555673	0.0489842	1.38742	0.242832	0.249357	0.321401	0.0276562		1.26058	0.00213035		1.04639	0.625807		0.667236	0.424756		0.420877	0.657783		0.373516	0.111625
>generic|frv2_99818|p.sativum_wa1_contig08004_4	frv2_99818;frv2_46491;frv2_95867;frv2_74528;frv2_46995;A4ULF8;frv2_46489;frv2_83423;frv2_115233;Q6SYB9;frv2_79380	p.sativum_wa1_contig08004_4 S-adenosylmethionine synthetase n=1 Tax=Cajanus cajan RepID=H6UJ33_CAJCA (UniRef100_H6UJ33 icov:95% qcovs:94.39% e-val:0)	amino acid metabolism.synthesis.aspartate family.methionine		1	nan	nan	1.05337	0.056295	0.114851	0.120388	0.0216484		0.852433	0.00231429		1.44571	0.0845653		1.60413	0.427533		0.45134	0.570513		2.20311	0.0734446
>generic|frv2_77661|Pisum_sativum_v2_Contig2612_4	frv2_77661;frv2_4343;frv2_47957;frv2_75394	Pisum_sativum_v2_Contig2612_4 PREDICTED: 40S ribosomal protein S20-2-like n=1 Tax=Cicer arietinum RepID=UPI00032A9118 (UniRef100_UPI00032A9118 icov:75% qcovs:96.72% e-val:2e-80)	protein.synthesis.ribosomal protein.eukaryotic.40S subunit.S20		1.10759	0.143708	0.0870173	1.03174	0.239018	0.248298	0.997572	0.362959		0.849996	0.0130297		1.1899	0.416267		0.624219	0.433052		1.06777	0.91833		1.84875	0.1119
>generic|frv2_80164|Pisum_sativum_v2_Contig4044_4	frv2_80164;Q8LC83;frv2_47185	Pisum_sativum_v2_Contig4044_4 40S ribosomal protein S24 n=1 Tax=Medicago truncatula RepID=B7FMK4_MEDTR (UniRef100_B7FMK4 icov:94% qcovs:99.27% e-val:2e-91)	protein.synthesis.ribosomal protein.eukaryotic.40S subunit.S24		0.887613	0.392836	0.174907	0.562083	0.30855	0.272853	4.57875	0.00387216		2.55652	0.0578774		1.10783	0.564785		1.60337	0.436547		1.49161	0.464108		21.2228	0.839148
>generic|frv2_49533|franssen_30476_2	frv2_49533;frv2_85387	franssen_30476_2 Proteasome subunit alpha type n=1 Tax=Medicago truncatula RepID=I3RZQ6_MEDTR (UniRef100_I3RZQ6 icov:90% qcovs:96.49% e-val:0)	protein.degradation.ubiquitin.proteasom		0.921103	0.335639	0.156958	0.785552	0.891873	0.396469	0.652422	0.564872		1.08336	0.74329		0.863706	0.144273		0.802932	0.438823		1.02641	0.0399753		1.9374	0.101377
>generic|frv2_45302|franssen_27839_3	frv2_45302;Q41709;frv2_74982;frv2_74975;frv2_74980;frv2_74973	franssen_27839_3 PREDICTED: ferritin-2, chloroplastic-like isoform X2 n=1 Tax=Cicer arietinum RepID=UPI00032AA212 (UniRef100_UPI00032AA212 icov:81% qcovs:87.55% e-val:4e-152)	metal handling.binding, chelation and storage		1.06649	0.548133	0.221836	0.567061	0.757269	0.361546	0.643795	0.392373		0.894131	0.950797		1.03673	0.816814		0.68927	0.439622		1.19049	0.390641		1.29866	0.956741
>generic|frv2_54577|franssen_33911_2	frv2_54577;frv2_83710	franssen_33911_2 PREDICTED: coatomer subunit epsilon-1-like n=1 Tax=Cicer arietinum RepID=UPI00032A5995 (UniRef100_UPI00032A5995 icov:99% qcovs:97.58% e-val:0)	cell.vesicle transport		1.26509	0.296169	0.142632	0.438849	0.146126	0.195896	3.19982	0.183913		1.28479	0.211813		1.26172	0.29173		0.850564	0.440593		2.00506	0.0066114		2.4021	0.681712
>generic|frv2_88896|Pisum_sativum_v2_Contig8423_1	frv2_88896;Q9FNE2	Pisum_sativum_v2_Contig8423_1 Glutaredoxin C4 n=1 Tax=Medicago truncatula RepID=A0A072TXU3_MEDTR (UniRef100_A0A072TXU3 icov:97% qcovs:86.92% e-val:1e-62)	redox.glutaredoxins		1.09061	0.230988	0.117861	0.640627	0.473117	0.302738	0.532717	0.700134		1.13028	0.000668734		0.928587	0.551647		0.572495	0.441008		1.63477	0.592542		1.64199	0.598314
>generic|frv2_83714|Pisum_sativum_v2_Contig5830_3	frv2_83714	Pisum_sativum_v2_Contig5830_3 3-oxo-delta(4,5)-steroid 5-beta-reductase-like protein n=1 Tax=Medicago truncatula RepID=G8A2A9_MEDTR (UniRef100_G8A2A9 icov:99% qcovs:89.74% e-val:0)	development.unspecified		1.25489	0.0603773	0.0518826	1.4127	0.634612	0.338541	1.66254	0.915121		1.03761	0.202418		1.02049	0.894683		0.667792	0.442383		0.61392	0.565173		1.05074	0.109131		X
>generic|carvalho6173|PsCam000781_1_AA	Q8S4Y1;frv2_82907	PsCam000781_1_AA Acetyl-CoA acetyltransferase, cytosolic 1 OS=Arabidopsis thaliana GN=AAT1 PE=2 SV=1 (sp	amino acid metabolism.degradation.branched chain group.isoleucine		0.773641	0.0889439	0.0653319	0.939436	0.993794	0.421131	0.590357	0.834303		1.32782	0.456254		0.905389	0.623648		0.630831	0.451681		1.15101	0.147055		1.83897	0.0768359
>generic|frv2_77541|Pisum_sativum_v2_Contig2534_6	frv2_77541	Pisum_sativum_v2_Contig2534_6 PREDICTED: putative leucine-rich repeat-containing protein DDB_G0290503-like isoform X2 n=1 Tax=Cicer arietinum RepID=UPI00032A8B55 (UniRef100_UPI00032A8B55 icov:99% qcovs:81.66% e-val:0)	not assigned.unknown		0.951277	0.883801	0.307747	2.07474	0.450903	0.302738	0.794933	0.121291		0.769146	0.00064637		0.737028	0.13618		0.265449	0.455241		1.15275	0.528766		1.33737	0.888581		X
>generic|frv2_120535|p.sativum_wa1_contig25772_5	frv2_120535;Q8LDU4;frv2_89942	p.sativum_wa1_contig25772_5 PREDICTED: red chlorophyll catabolite reductase, chloroplastic-like n=1 Tax=Cicer arietinum RepID=UPI00032ACA6B (UniRef100_UPI00032ACA6B icov:89% qcovs:78.26% e-val:7e-162)	stress.biotic		0.918294	0.107427	0.0743921	1.6873	0.334152	0.27944	0.375299	0.433179		1.22591	0.000283285		1.11044	0.583796		0.630445	0.455688		1.69278	0.910044		1.99897	0.176334
>generic|frv2_136847|p.sativum_wa1_contig35715_4	frv2_136847	p.sativum_wa1_contig35715_4 PREDICTED: uncharacterized protein LOC101506193 n=1 Tax=Cicer arietinum RepID=UPI00032AB54D (UniRef100_UPI00032AB54D icov:89% qcovs:74.51% e-val:9e-52)	not assigned.unknown		0.900663	0.67334	0.25628	0.336478	0.0872961	0.147654	1.12709	0.0582108		0.94731	0.841496		0.731197	0.304197		0.311149	0.457044		1.22404	0.654565		0.586668	0.175512		X
>generic|frv2_111891|p.sativum_wa1_contig18806_5	frv2_111891	p.sativum_wa1_contig18806_5 Elongation factor Tu, chloroplastic n=1 Tax=Pisum sativum RepID=EFTU_PEA (UniRef100_O24310 icov:93% qcovs:99.39% e-val:0)	protein.synthesis.elongation		0.783143	0.13994	0.0859119	1.23913	0.888655	0.396084	0.585071	0.682674		1.37342	0.676676		1.10302	0.566651		1.35139	0.457649		1.23019	0.493155		3.91466	0.967843		X
>generic|frv2_85235|Pisum_sativum_v2_Contig6593_1	frv2_85235;B1LLJ9	Pisum_sativum_v2_Contig6593_1 PREDICTED: 2-keto-3-deoxy-L-rhamnonate aldolase-like isoform X1 n=1 Tax=Cicer arietinum RepID=UPI00032A90FD (UniRef100_UPI00032A90FD icov:93% qcovs:79.13% e-val:0)	not assigned.no ontology		0.908346	0.565288	0.226982	1.35392	0.487197	0.304627	0.33761	0.403456		0.981508	0.5256		0.97174	0.821907		0.558568	0.459299		1.16181	0.826034		1.59253	0.0697749
>generic|frv2_103864|p.sativum_wa1_contig11971_2	frv2_103864	p.sativum_wa1_contig11971_2 PREDICTED: ATP-dependent (S)-NAD(P)H-hydrate dehydratase-like isoform X1 n=2 Tax=Cicer arietinum RepID=UPI00032AC6C7 (UniRef100_UPI00032AC6C7 icov:97% qcovs:89.78% e-val:0)	minor CHO metabolism.others		1.3266	0.0850407	0.0641618	0.797965	0.930055	0.405004	1.03283	0.470472		0.78187	0.394003		0.827154	0.265815		1.38277	0.460938		1.29364	0.474651		0.972456	0.345021		X
>generic|frv2_68922|franssen_42495_1	frv2_68922;frv2_95379	franssen_42495_1 Glutathione S-transferase n=1 Tax=Medicago truncatula RepID=A0A072UVM3_MEDTR (UniRef100_A0A072UVM3 icov:89% qcovs:93.49% e-val:2e-147)	misc.glutathione S transferases		0.865753	0.197755	0.106994	1.73872	0.584806	0.329902	0.383384	0.407055		0.680493	0.885503		0.835445	0.446232		0.775131	0.461198		0.6819	0.442244		1.02813	0.333442
>generic|carvalho30436|PsCam043462_1_AA	Q84WM9;frv2_40473;frv2_34988;frv2_95584	PsCam043462_1_AA Elongation factor 1-beta 1 OS=Arabidopsis thaliana GN=At5g12110 PE=2 SV=2 (sp	protein.synthesis.elongation		0.945101	0.339199	0.157423	1.08417	0.45571	0.302738	1.04169	0.870984		0.879306	0.0497116		0.937028	0.543352		0.71329	0.46418		1.05838	0.769035		1.9645	0.537501
>generic|frv2_82026|Pisum_sativum_v2_Contig4989_3	frv2_82026	Pisum_sativum_v2_Contig4989_3 Aminoaldehyde dehydrogenase n=1 Tax=Pisum sativum RepID=Q93YB2_PEA (UniRef100_Q93YB2 icov:96% qcovs:100% e-val:0)	secondary metabolism.N misc.betaine.betaine-aldehyde dehydrogenase		0.891644	0.0686917	0.0561938	1.25201	0.303237	0.272049	3.69283	0.22565		1.44911	0.0225475		0.905136	0.184121		0.792071	0.465348		1.92208	0.457706		2.16006	0.113686		X
>generic|carvalho6469|PsCam001240_1_AA	Q8L611	PsCam001240_1_AA Protein transport protein SEC31 homolog B OS=Arabidopsis thaliana GN=SEC31B PE=1 SV=1 (sp	not assigned.no ontology		0.992337	0.878278	0.307059	1.47289	0.446276	0.302453	0.66734	0.561487		0.7954	0.592821		1.09972	0.257814		0.614105	0.466676		1.01723	0.300133		3.51487	0.693396		X
>generic|frv2_73788|Pisum_sativum_v2_Contig22_6	frv2_73788	Pisum_sativum_v2_Contig22_6 Leukotriene A-4 hydrolase-like protein n=2 Tax=Medicago RepID=G7IAW9_MEDTR (UniRef100_G7IAW9 icov:97% qcovs:91.91% e-val:0)	protein.degradation		1	nan	nan	3.73183	0.295337	0.27021	0.0718744	0.166225		1.33676	0.000404364		0.90561	0.16871		0.61456	0.469993		1.95938	0.161507		2.2233	0.0254359		X
>generic|frv2_87366|Pisum_sativum_v2_Contig7657_6	frv2_87366;frv2_136498	Pisum_sativum_v2_Contig7657_6 Profilin n=5 Tax=Gossypium RepID=A0A0B0PXT5_GOSAR (UniRef100_A0A0B0PXT5 icov:86% qcovs:91.6% e-val:2e-84)	cell.organisation		0.795558	0.0729858	0.058921	0.878259	0.780701	0.36873	2.50401	0.629497		1.96316	0.416708		1.11797	0.0868095		0.691808	0.471313		2.11549	0.696507		8.66285	0.098345
>generic|frv2_85668|Pisum_sativum_v2_Contig6811_2	frv2_85668;O24361	Pisum_sativum_v2_Contig6811_2 Proteasome subunit beta type n=1 Tax=Medicago truncatula RepID=G7J5I9_MEDTR (UniRef100_G7J5I9 icov:98% qcovs:97.04% e-val:0)	protein.degradation.ubiquitin.proteasom		1.21933	0.260575	0.127695	0.743108	0.732526	0.354869	0.503673	0.98679		1.00239	0.47627		0.989281	0.899546		1.17643	0.475914		1.9196	0.611931		2.4655	0.606288
>generic|frv2_80212|Pisum_sativum_v2_Contig4070_3	frv2_80212;Q93VR3;frv2_73628	Pisum_sativum_v2_Contig4070_3 GDP-D-mannose-3,5-epimerase n=3 Tax=Medicago truncatula RepID=A0A072VNM9_MEDTR (UniRef100_A0A072VNM9 icov:98% qcovs:95.44% e-val:0)	redox.ascorbate and glutathione.ascorbate.GME		1.27123	0.0832832	0.0634018	0.840436	0.627693	0.338541	7.29515	0.269979		1.94593	0.685198		0.805995	0.153613		1.53627	0.478077		1.37663	0.747736		4.33074	0.213821
>generic|frv2_84618|Pisum_sativum_v2_Contig6285_2	frv2_84618	Pisum_sativum_v2_Contig6285_2 60S acidic ribosomal protein P0-1 n=1 Tax=Medicago truncatula RepID=G7KGX1_MEDTR (UniRef100_G7KGX1 icov:98% qcovs:91.3% e-val:0)	protein.synthesis.ribosomal protein.eukaryotic.60S subunit.P0		0.860228	0.0519907	0.0469743	1.29223	0.659852	0.34243	0.806289	0.755762		0.764613	0.129318		1.00135	0.984884		0.740765	0.479891		1.36721	0.156085		2.08687	0.150825		X
>generic|carvalho28391|PsCam040030_1_AA	B7FKW7;frv2_49079;frv2_87521	PsCam040030_1_AA Cyanate hydratase OS=Medicago truncatula GN=CYN PE=2 SV=1 (sp	secondary metabolism.N misc.cyanogenic glycosides.cyanase		1.22049	0.115376	0.0777895	2.04884	0.365827	0.286797	1.70725	0.795325		1.22717	0.463435		0.812409	0.38436		0.580772	0.482016		1.81322	0.525506		2.50351	0.117743
>generic|frv2_55041|franssen_34209_5	frv2_55041;frv2_83569;Q6ERU3	franssen_34209_5 Nutrient reservoir protein, putative n=2 Tax=Medicago truncatula RepID=A0A072ULZ3_MEDTR (UniRef100_A0A072ULZ3 icov:100% qcovs:88.32% e-val:0)	development.storage proteins		0.606174	0.283653	0.137903	3.93982	0.347349	0.286413	0.559019	0.271659		0.70066	0.104189		0.653999	0.161479		0.615573	0.485848		1.98643	0.516809		1.93973	0.697264
>generic|mut17|Pisum_sativum_v2_Contig814_m	mut17;frv2_56762;frv2_75048;frv2_25394;frv2_134663;Q43472	Pisum_sativum_v2_Contig814_m no BLAST information available	RNA.regulation of transcription.GRP		0.879899	0.18882	0.103413	1.20873	0.146629	0.195896	0.133667	0.990369		1.39891	0.0632248		1.07741	0.678802		0.631657	0.491151		1.28093	0.862218		2.83498	0.106364
>generic|frv2_125861|p.sativum_wa1_contig29308_4	frv2_125861;Q9FLX7;frv2_47524	p.sativum_wa1_contig29308_4 PREDICTED: probable NADH dehydrogenase [ubiquinone] 1 alpha subcomplex subunit 5, mitochondrial-like n=1 Tax=Cicer arietinum RepID=UPI00032A5466 (UniRef100_UPI00032A5466 icov:96% qcovs:89.56% e-val:1e-117)	mitochondrial electron transport / ATP synthesis.NADH-DH.localisation not clear		1.2928	0.400836	0.176674	2.74969	0.205021	0.231123	0.174028	0.144762		0.819815	0.296241		0.577606	0.0724387		0.626849	0.492963		0.552077	0.994577		1.39453	0.885543
>generic|frv2_81795|Pisum_sativum_v2_Contig4872_2	frv2_81795;O65902	Pisum_sativum_v2_Contig4872_2 PREDICTED: adenylyl cyclase-associated protein-like n=1 Tax=Cicer arietinum RepID=UPI00032AC2BF (UniRef100_UPI00032AC2BF icov:95% qcovs:89.79% e-val:0)	DNA.unspecified		1.04309	0.660001	0.252456	2.75507	0.40488	0.296208	2.1657	0.452353		0.798991	0.473581		1.13581	0.521452		0.650606	0.496777		1.74296	0.627444		10.1096	0.0634222
>generic|frv2_47222|franssen_28950_2	frv2_47222	franssen_28950_2 PREDICTED: 60S ribosomal protein L15-1-like isoform X2 n=1 Tax=Cicer arietinum RepID=UPI00032A5F9C (UniRef100_UPI00032A5F9C icov:90% qcovs:97.55% e-val:1e-141)	protein.synthesis.ribosomal protein.eukaryotic.60S subunit.L15		1	nan	nan	3.33228	0.28073	0.265624	0.0891014	0.125473		0.216466	0.188761		1.2601	0.37127		1.52962	0.499261		0.262967	0.253615		0.428543	0.0801243		X
>generic|frv2_83257|Pisum_sativum_v2_Contig5603_2	frv2_83257;frv2_78650	Pisum_sativum_v2_Contig5603_2 PREDICTED: 26S protease regulatory subunit 10B homolog A-like n=1 Tax=Cicer arietinum RepID=UPI00032ACE0E (UniRef100_UPI00032ACE0E icov:97% qcovs:99.75% e-val:0)	protein.degradation.ubiquitin.proteasom		0.844596	0.0756147	0.0600945	0.841593	0.303217	0.272049	0.284604	0.618093		0.813863	0.491621		0.974029	0.791925		0.651128	0.501		0.900246	0.642523		1.78524	0.208657
>generic|frv2_111622|p.sativum_wa1_contig18553_6	frv2_111622;frv2_47274	p.sativum_wa1_contig18553_6 ATP synthase subunit beta n=1 Tax=Glycine max RepID=I1NFS4_SOYBN (UniRef100_I1NFS4 icov:97% qcovs:93.56% e-val:0)	mitochondrial electron transport / ATP synthesis.F1-ATPase		0.996676	0.931901	0.31942	2.24606	0.693337	0.344163	0.729192	0.543915		1.40443	0.0175872		1.07181	0.484249		0.769841	0.502188		1.00823	0.430517		1.15946	0.872531
>generic|carvalho12391|PsCam011196_1_AA	Q945F4;frv2_74723;frv2_2899	PsCam011196_1_AA Eukaryotic translation initiation factor 5A-2 OS=Medicago sativa PE=2 SV=1 (sp	protein.synthesis.initiation		1.2714	0.174932	0.0984665	1.88769	0.336683	0.27995	0.110719	0.562083		0.751471	0.192539		0.736177	0.0833165		0.521199	0.504037		1.38886	0.816282		1.59821	0.159798
>generic|frv2_65211|franssen_40308_1	frv2_65211;frv2_114027	franssen_40308_1 PREDICTED: stomatin-like protein 2, mitochondrial-like n=1 Tax=Cicer arietinum RepID=UPI00032A972B (UniRef100_UPI00032A972B icov:97% qcovs:89.73% e-val:0)	not assigned.no ontology		1.49816	0.139916	0.0859119	1.44291	0.290348	0.27021	0.299906	0.360342		0.676099	0.272315		0.940667	0.533982		0.60992	0.508379		0.572333	0.656468		2.13419	0.0253085
>generic|frv2_120965|p.sativum_wa1_contig26070_5	frv2_120965;frv2_52101;Q2TBG8	p.sativum_wa1_contig26070_5 Ubiquitin carboxyl-terminal hydrolase n=1 Tax=Medicago truncatula RepID=I3T7K5_MEDTR (UniRef100_I3T7K5 icov:99% qcovs:91.45% e-val:2e-99)	protein.degradation		1.16453	0.446658	0.190788	1.17145	0.844664	0.384266	0.479438	0.920815		1.00352	0.59199		0.92615	0.449361		0.520247	0.512053		0.890526	0.652983		2.43546	0.0620662
>generic|frv2_111308|p.sativum_wa1_contig18233_4	frv2_111308	p.sativum_wa1_contig18233_4 PREDICTED: far upstream element-binding protein 1-like n=1 Tax=Cicer arietinum RepID=UPI00032A8139 (UniRef100_UPI00032A8139 icov:95% qcovs:84.58% e-val:0)	RNA.RNA binding		0.586006	0.156419	0.0913155	1.9826	0.685517	0.344163	1.06182	0.412695		0.891258	0.0960575		1.01339	0.965977		0.61548	0.514997		1.6634	0.684269		3.56601	0.15816		X
>generic|frv2_83064|Pisum_sativum_v2_Contig5506_3	frv2_83064	Pisum_sativum_v2_Contig5506_3 Aldose 1-epimerase family protein n=1 Tax=Medicago truncatula RepID=G7IN18_MEDTR (UniRef100_G7IN18 icov:95% qcovs:92.88% e-val:0)	minor CHO metabolism.others		0.852032	0.147514	0.0883854	1.17695	0.666104	0.34243	1.13432	0.433173		1.44502	0.908475		1.01016	0.970512		0.685699	0.515995		1.9597	0.193521		4.12813	0.0135371		X
>generic|carvalho11864|PsCam010485_1_AA	Q9LVC9;frv2_6101;O24413;frv2_49232;frv2_49233;frv2_75269	PsCam010485_1_AA 60S acidic ribosomal protein P3-2 OS=Arabidopsis thaliana GN=RPP3B PE=2 SV=1 (sp	not assigned.unknown		1.47151	0.0928526	0.0675331	1.13435	0.453665	0.302738	0.240414	0.739512		0.741055	0.0290586		1.1899	0.237906		0.692823	0.518283		0.626237	0.841861		2.54551	0.140239
>generic|frv2_115838|p.sativum_wa1_contig22196_4	frv2_115838	p.sativum_wa1_contig22196_4 Spermidine synthase 1 n=1 Tax=Pisum sativum RepID=SPD1_PEA (UniRef100_Q9ZTR1 icov:97% qcovs:100% e-val:0)	polyamine metabolism.synthesis.spermidine synthase		0.89332	0.158867	0.0919544	0.33972	0.167301	0.214292	0.272815	0.171253		0.758898	0.0181571		0.930513	0.686426		1.50866	0.526175		0.703805	0.735771		2.0384	0.527877		X
>generic|frv2_80259|Pisum_sativum_v2_Contig4094_5	frv2_80259	Pisum_sativum_v2_Contig4094_5 Catalase n=1 Tax=Pisum sativum RepID=C0STY9_PEA (UniRef100_C0STY9 icov:97% qcovs:100% e-val:0)	redox.dismutases and catalases		1.1307	0.257763	0.126716	1.14561	0.795071	0.372901	0.921017	0.429214		1.03918	0.0360654		1.02839	0.210878		1.16094	0.529294		0.718307	0.325178		0.694884	0.00409338		X
>generic|frv2_77551|Pisum_sativum_v2_Contig2541_1	frv2_77551;frv2_52407;A7SDW5	Pisum_sativum_v2_Contig2541_1 Eukaryotic translation initiation factor 3 subunit L n=1 Tax=Medicago truncatula RepID=G7ZWE0_MEDTR (UniRef100_G7ZWE0 icov:94% qcovs:94.13% e-val:0)	not assigned.unknown		0.844224	0.300634	0.143878	1.40346	0.259491	0.253688	0.210515	0.411998		0.87017	0.175818		1.1869	0.183616		1.57725	0.53207		0.519403	0.000936164		1.43262	0.125193
>generic|frv2_79775|Pisum_sativum_v2_Contig3842_5	frv2_79775	Pisum_sativum_v2_Contig3842_5 Desiccation PCC13-like protein n=1 Tax=Medicago truncatula RepID=A2Q670_MEDTR (UniRef100_A2Q670 icov:99% qcovs:76.9% e-val:2e-163)	not assigned.unknown		1.17777	0.698568	0.264243	0.243542	0.137152	0.192496	27.3185	0.125158		0.843542	0.398036		1.06691	0.535537		0.764934	0.536543		1.77431	0.108076		6.02542	0.00994277		X
>generic|frv2_64196|franssen_39724_2	frv2_64196;frv2_102582;Q9FFD2	franssen_39724_2 Alpha-1,4-glucan-protein synthase (UDP-forming) n=1 Tax=Medicago truncatula RepID=Q2HV87_MEDTR (UniRef100_Q2HV87 icov:96% qcovs:92.51% e-val:0)	cell wall.cell wall proteins.RGP		0.692148	0.0504315	0.0466302	0.0269587	0.475914	0.302738	1.34525	0.355431		0.750824	0.309752		1.03124	0.749201		1.57428	0.536785		1.70976	0.603302		3.88617	0.668499
>generic|frv2_49660|franssen_30561_2	frv2_49660;O64530;frv2_83506	franssen_30561_2 Sulfurtransferase n=1 Tax=Medicago truncatula RepID=G8A093_MEDTR (UniRef100_G8A093 icov:95% qcovs:89.27% e-val:0)	amino acid metabolism.degradation.serine-glycine-cysteine group.cysteine		0.969591	0.823573	0.293437	0.638006	0.691439	0.344163	0.792773	0.484714		0.98782	0.0682268		0.898443	0.338603		0.851011	0.538321		1.02669	0.925262		2.87231	0.866286
>generic|frv2_33568|franssen_19706_4	frv2_33568;Q39315;frv2_31268	franssen_19706_4 Acyl-CoA-binding domain protein n=1 Tax=Medicago truncatula RepID=G7K6T1_MEDTR (UniRef100_G7K6T1 icov:77% qcovs:85.39% e-val:7e-49)	lipid metabolism.FA synthesis and FA elongation.acyl-CoA binding protein		0.7744	0.0612782	0.052209	0.338648	0.639581	0.338541	0.752773	0.567761		1.11348	0.207703		0.846095	0.481875		0.804031	0.544416		1.29416	0.48521		1.7928	0.351884
>generic|frv2_45914|franssen_28182_6	frv2_45914;frv2_8729;frv2_68938;frv2_1192;frv2_45915;frv2_30598;frv2_42309;frv2_45903;frv2_93899;frv2_74447;frv2_97847;frv2_132310;frv2_70108;frv2_41386;Q43083;P0CG89;frv2_30573;frv2_45921;frv2_137817;frv2_75853;frv2_35821;frv2_44635;P70081;frv2_1206;frv2_121724	franssen_28182_6 Histone H4 n=1 Tax=Zea mays RepID=B6T0P4_MAIZE (UniRef100_B6T0P4 icov:98% qcovs:97.73% e-val:1e-53)	DNA.synthesis/chromatin structure.histone.core.H4		0.851931	0.11116	0.075948	1.02564	nan	nan	0.7183	0.32167		0.995156	0.0166174		1	nan		1.57089	0.544923		1.05028	0.763363		1.31485	0.785271
>generic|carvalho6942|PsCam002082_1_AA	Q5E9E4;frv2_87414;frv2_59541	PsCam002082_1_AA Translocon-associated protein subunit beta OS=Bos taurus GN=SSR2 PE=2 SV=1 (sp	not assigned.no ontology		0.875152	0.201416	0.108091	1.26209	0.184925	0.222796	13.8784	0.0761901		1.24403	0.0704416		1.01766	0.858224		0.588026	0.546882		2.44775	0.523157		3.39099	0.95811
>generic|frv2_111451|p.sativum_wa1_contig18384_4	frv2_111451;frv2_52867	p.sativum_wa1_contig18384_4 PREDICTED: asparagine--tRNA ligase, cytoplasmic 1-like n=1 Tax=Cicer arietinum RepID=UPI00032A954B (UniRef100_UPI00032A954B icov:95% qcovs:91.04% e-val:0)	protein.aa activation.asparagine-tRNA ligase		1.05054	0.526851	0.215785	1.15537	0.246179	0.249357	0.824497	0.216191		0.718953	0.121178		1.20941	0.0508678		1.13997	0.550102		0.491001	0.937548		0.467864	0.342009
>generic|frv2_112512|p.sativum_wa1_contig19367_6	frv2_112512;frv2_55910;Q0WM29	p.sativum_wa1_contig19367_6 Methylmalonate-semialdehyde dehydrogenase n=1 Tax=Medicago truncatula RepID=G7JU35_MEDTR (UniRef100_G7JU35 icov:95% qcovs:94.24% e-val:0)	amino acid metabolism.degradation.branched chain group.valine		1.03175	0.609326	0.240263	1.92125	0.262453	0.253978	0.910445	0.169011		1.39794	0.14429		0.914364	0.595977		0.816614	0.551039		0.595244	0.831025		0.895888	0.829923
>generic|frv2_49134|franssen_30210_3	frv2_49134	franssen_30210_3 PREDICTED: leucine aminopeptidase 3, chloroplastic-like n=1 Tax=Cicer arietinum RepID=UPI00032A6501 (UniRef100_UPI00032A6501 icov:99% qcovs:91.93% e-val:0)	protein.degradation		0.935571	0.0960437	0.0687295	0.732211	0.260996	0.253978	0.597535	0.368833		0.78188	0.678655		1.05797	0.471016		1.15784	0.554705		0.739621	0.0345704		1.09228	0.199605		X
>generic|frv2_95667|p.sativum_wa1_contig02521_5	frv2_95667;frv2_75294;frv2_75293;P49211	p.sativum_wa1_contig02521_5 Uncharacterized protein n=2 Tax=Lotus japonicus RepID=I3SZE8_LOTJA (UniRef100_I3SZE8 icov:88% qcovs:96.24% e-val:5e-89)	protein.synthesis.ribosomal protein.eukaryotic.60S subunit.L32		0.869596	0.162747	0.0929727	0.444024	0.584575	0.329902	1.13306	0.457563		1.38509	0.937309		0.921234	0.634233		1.44117	0.554809		0.769506	0.0399885		1.17385	0.438781
>generic|frv2_130543|p.sativum_wa1_contig32152_4	frv2_130543	p.sativum_wa1_contig32152_4 PREDICTED: phospholipase D alpha 1-like n=1 Tax=Cicer arietinum RepID=UPI00032A8C9F (UniRef100_UPI00032A8C9F icov:99% qcovs:93.88% e-val:1e-124)	lipid metabolism.lipid degradation.lysophospholipases.phospholipase D		0.939044	0.64393	0.247854	0.139819	0.599892	0.334088	3.1451	0.687259		1.27184	0.106316		1.1208	0.687502		1.88263	0.55719		1.38132	0.01798		2.83209	0.335741		X
>generic|frv2_87000|Pisum_sativum_v2_Contig7473_4	frv2_87000;frv2_48363;frv2_74195;frv2_4868	Pisum_sativum_v2_Contig7473_4 Nucleoside diphosphate kinase n=1 Tax=Pisum sativum RepID=C0STY7_PEA (UniRef100_C0STY7 icov:98% qcovs:100% e-val:8e-170)	nucleotide metabolism.phosphotransfer and pyrophosphatases.nucleoside diphosphate kinase		1	nan	nan	6.23796	0.0953362	0.153504	0.0147648	0.0651031		0.168297	0.00216404		1.10262	0.62047		0.511593	0.560928		0.0720027	0.742377		1.90893	0.305946
>generic|frv2_80223|Pisum_sativum_v2_Contig4075_5	frv2_80223;frv2_47661	Pisum_sativum_v2_Contig4075_5 Class I glutamine amidotransferase superfamily protein n=1 Tax=Medicago truncatula RepID=G7J7W0_MEDTR (UniRef100_G7J7W0 icov:95% qcovs:93.8% e-val:0)	not assigned.no ontology		1.08379	0.614996	0.241258	1.18691	0.931596	0.405004	3.03399	0.0546388		1.12273	0.00914539		0.791209	0.41463		0.595383	0.561483		1.69708	0.987454		1.14444	0.107321
>generic|frv2_83143|Pisum_sativum_v2_Contig5546_2	frv2_83143	Pisum_sativum_v2_Contig5546_2 PREDICTED: 26S protease regulatory subunit 7-like n=1 Tax=Cicer arietinum RepID=UPI00032A82A8 (UniRef100_UPI00032A82A8 icov:99% qcovs:100% e-val:0)	protein.degradation.ubiquitin.proteasom		1.35127	0.0546915	0.0484875	0.944702	0.661354	0.34243	4.98956	0.792385		1.69128	0.100443		0.907543	0.407135		0.697891	0.562061		1.34617	0.346217		114.938	0.175244		X
>generic|frv2_111347|p.sativum_wa1_contig18280_6	frv2_111347;frv2_56877	p.sativum_wa1_contig18280_6 TCP-1/cpn60 chaperonin family protein n=1 Tax=Medicago truncatula RepID=G7L831_MEDTR (UniRef100_G7L831 icov:97% qcovs:96.14% e-val:0)	protein.folding		0.855839	0.256059	0.126086	1.98376	0.102763	0.160763	0.589986	0.035147		0.956908	0.0757665		0.969717	0.644131		0.788799	0.562088		0.888691	0.632014		1.7967	0.325861
>generic|frv2_53962|franssen_33512_2	frv2_53962	franssen_33512_2 UDP-D-glucose/UDP-D-galactose 4-epimerase n=1 Tax=Medicago truncatula RepID=G7K9B4_MEDTR (UniRef100_G7K9B4 icov:95% qcovs:93.1% e-val:3e-159)	cell wall.precursor synthesis.UGE		0.948785	0.458873	0.194165	0.564581	0.0612932	0.119632	0.383318	0.0453564		0.819235	0.578765		0.87587	0.0633787		0.664796	0.563362		0.970736	0.467097		1.79121	0.0894912		X
>generic|carvalho6657|PsCam001576_1_AA	Q9LZ06;frv2_80219	PsCam001576_1_AA Glutathione S-transferase L3 OS=Arabidopsis thaliana GN=GSTL3 PE=2 SV=1 (sp	misc.glutathione S transferases		0.938731	0.486907	0.202886	0.918008	0.675677	0.34309	2.46328	0.735384		0.996645	0.372505		0.939848	0.659622		0.866749	0.565543		2.73157	0.1131		2.77205	0.316389
>generic|frv2_50342|franssen_31046_3	frv2_50342;Q9SZ30	franssen_31046_3 Imidazole glycerol phosphate synthase subunit HisF n=1 Tax=Medicago truncatula RepID=A0A072UVM2_MEDTR (UniRef100_A0A072UVM2 icov:97% qcovs:92.61% e-val:0)	amino acid metabolism.synthesis.histidine.N-5-phosphoribosyl-formimino-5-aminoimidazole-4-carboxamide ribonucleotide isomerase		1.45178	0.0755916	0.0600945	2.67996	0.426006	0.298912	0.707105	0.438498		0.942133	0.110169		0.738636	0.276078		1.43145	0.567513		0.789431	0.37194		2.13375	0.572777
>generic|frv2_80956|Pisum_sativum_v2_Contig4456_1	frv2_80956;frv2_48651	Pisum_sativum_v2_Contig4456_1 Stromal 70 kDa heat shock-related protein, chloroplastic n=1 Tax=Pisum sativum RepID=HSP7S_PEA (UniRef100_Q02028 icov:99% qcovs:100% e-val:0)	stress.abiotic.heat		0.991924	0.90966	0.313901	1.7355	0.554085	0.321087	2.95723	0.323492		1.0764	0.000784266		1.1011	0.225884		0.76999	0.573399		1.36611	0.500637		1.89606	0.746305
>generic|frv2_82054|Pisum_sativum_v2_Contig5003_1	frv2_82054;frv2_47646	Pisum_sativum_v2_Contig5003_1 6-phosphogluconate dehydrogenase, decarboxylating n=2 Tax=Medicago truncatula RepID=A0A072TX81_MEDTR (UniRef100_A0A072TX81 icov:99% qcovs:96.5% e-val:0)	OPP.oxidative PP.6-phosphogluconate dehydrogenase		0.947734	0.386389	0.173041	1.1088	0.247933	0.249357	0.339883	0.32723		0.398274	0.0939961		1.0297	0.876889		0.731145	0.573748		0.489456	0.497313		0.75048	0.820005
>generic|frv2_49159|franssen_30228_2	frv2_49159;frv2_82202	franssen_30228_2 Glutamate 1-semialdehyde aminotransferase n=1 Tax=Medicago sativa RepID=G4W9I6_MEDSA (UniRef100_G4W9I6 icov:97% qcovs:95.58% e-val:0)	tetrapyrrole synthesis.GSA		2.23024	0.226443	0.116359	3.09725	0.0693604	0.128561	0.14163	0.0649254		0.74041	0.010443		1.17236	0.570429		0.548172	0.574125		2.75239	0.459462		1	0.960704
>generic|mut26|p.sativum_wa1_contig18571_m1	mut26	p.sativum_wa1_contig18571_m1 no BLAST information available	TCA / org transformation.TCA.pyruvate DH.E2		0.93851	0.432114	0.186963	1.19579	0.0741591	0.132813	4.26981	0.0781347		5.27148	0.37363		0.876347	0.416318		0.73921	0.579588		2.82316	0.040491		5.83994	0.185122		X
>generic|frv2_45969|franssen_28214_3	frv2_45969;frv2_99710	franssen_28214_3 Chaperone protein ClpC, chloroplastic n=1 Tax=Pisum sativum RepID=CLPC_PEA (UniRef100_P35100 icov:90% qcovs:99.45% e-val:0)	protein.degradation.serine protease		0.872844	0.222088	0.115041	0.776041	0.363853	0.286797	1.34962	0.498432		1.3133	0.0083212		0.817428	0.151078		0.798824	0.583353		1.24776	0.447234		0.897718	0.0317287
>generic|frv2_103882|p.sativum_wa1_contig11985_6	frv2_103882;frv2_53002	p.sativum_wa1_contig11985_6 TCP-1/cpn60 chaperonin family protein n=1 Tax=Medicago truncatula RepID=A0A072VGH7_MEDTR (UniRef100_A0A072VGH7 icov:94% qcovs:94.88% e-val:0)	protein.folding		0.973896	0.602993	0.238686	1.05798	0.204957	0.231123	4.07458	0.382777		1.14372	0.215114		1.0739	0.460845		0.706911	0.583448		1.48502	0.44539		6.17234	0.101815
>generic|frv2_112473|p.sativum_wa1_contig19340_4	frv2_112473;frv2_48353	p.sativum_wa1_contig19340_4 26S proteasome regulatory subunit N5 n=1 Tax=Medicago truncatula RepID=B7FLC5_MEDTR (UniRef100_B7FLC5 icov:97% qcovs:95.92% e-val:0)	protein.degradation.ubiquitin.proteasom		0.934793	0.447161	0.190788	1.86651	0.448174	0.302599	0.471234	0.440769		1.08956	0.65886		0.991669	0.970127		0.711323	0.583656		8.14315	0.366655		2.87435	0.296442
>generic|frv2_46738|franssen_28663_1	frv2_46738;frv2_97144;frv2_76118;frv2_97142;frv2_46733;P46300	franssen_28663_1 PREDICTED: 40S ribosomal protein S4-2-like n=1 Tax=Cicer arietinum RepID=UPI00032A87C6 (UniRef100_UPI00032A87C6 icov:100% qcovs:98.21% e-val:4e-157)	protein.synthesis.ribosomal protein.eukaryotic.40S subunit.S4		1.23772	0.235597	0.118483	1.17092	0.579855	0.329902	1.3648	0.460982		1.01463	0.207841		1.23862	0.236004		1.43908	0.585711		1.24698	0.144111		2.95466	0.508835
>generic|frv2_81301|Pisum_sativum_v2_Contig4628_1	frv2_81301;P27456	Pisum_sativum_v2_Contig4628_1 Glutathione reductase, chloroplastic/mitochondrial n=1 Tax=Pisum sativum RepID=GSHRP_PEA (UniRef100_P27456 icov:98% qcovs:100% e-val:0)	redox.ascorbate and glutathione.glutathione		1.05146	0.70384	0.265356	3.86037	0.329341	0.27944	0.124467	0.32923		0.917353	0.929995		0.710515	0.116118		0.775389	0.593457		0.23285	0.391924		0.801851	0.373901
>generic|carvalho34223|PsCam049151_1_AA	Q54800	PsCam049151_1_AA UTP--glucose-1-phosphate uridylyltransferase OS=Streptococcus pneumoniae GN=cap3C PE=3 SV=1 (sp	not assigned.unknown		0.599694	0.126373	0.0809345	3.07594	0.148036	0.196054	0.311174	0.145267		0.998036	0.177501		1.30658	0.166034		0.622676	0.594609		1.96384	0.919577		3.07639	0.149956		X
>generic|frv2_104682|p.sativum_wa1_contig12663_4	frv2_104682;frv2_6518	p.sativum_wa1_contig12663_4 Polyadenylate-binding protein RBP47C n=1 Tax=Medicago truncatula RepID=G7JJ57_MEDTR (UniRef100_G7JJ57 icov:92% qcovs:91.69% e-val:0)	RNA.processing		1.15476	0.247466	0.122593	1.12373	0.344475	0.285231	0.706135	0.684416		0.869582	0.0226957		1.21977	0.143513		0.770981	0.594892		1.11217	0.934844		1.22883	0.270042
>generic|carvalho17410|PsCam022797_1_AA	Q8H1H9;frv2_82418;frv2_62589	PsCam022797_1_AA Primary amine oxidase OS=Arabidopsis thaliana GN=At1g62810 PE=2 SV=1 (sp	misc.oxidases - copper, flavone etc		1.27222	0.203378	0.108617	2.52358	0.376424	0.287617	0.13925	0.315602		2.24855	0.0299773		0.874543	0.536226		0.831485	0.594971		0.981998	0.1221		1.8796	0.580737
>generic|frv2_119420|p.sativum_wa1_contig24966_6	frv2_119420;frv2_50265;frv2_86927;frv2_95292;O23657	p.sativum_wa1_contig24966_6 PREDICTED: ras-related protein RABC1-like n=1 Tax=Cicer arietinum RepID=UPI00032A50AF (UniRef100_UPI00032A50AF icov:98% qcovs:95.33% e-val:5e-149)	signalling.G-proteins		0.680183	0.050649	0.0466597	0.56399	0.686293	0.344163	0.430401	0.767816		0.447957	0.367643		1.09086	0.490898		1.6769	0.603135		0.713025	0.000768769		1.33507	0.0382733
>generic|frv2_97457|p.sativum_wa1_contig05509_1	frv2_97457	p.sativum_wa1_contig05509_1 Uncharacterized protein n=3 Tax=Medicago truncatula RepID=I3S5F5_MEDTR (UniRef100_I3S5F5 icov:100% qcovs:90.23% e-val:0)	lipid metabolism.lipid degradation.beta-oxidation.enoyl CoA hydratase		1.06463	0.862507	0.303432	2.1752	0.574199	0.328415	0.476247	0.530614		0.770169	0.264796		1.17505	0.627818		1.57305	0.604457		1.5383	0.679018		2.07694	0.824583		X
>generic|frv2_48711|franssen_29923_2	frv2_48711;frv2_113158;P28011	franssen_29923_2 Aspartate aminotransferase n=4 Tax=Medicago truncatula RepID=A0A072VCX2_MEDTR (UniRef100_A0A072VCX2 icov:100% qcovs:91.01% e-val:0)	amino acid metabolism.synthesis.central amino acid metabolism.aspartate.aspartate aminotransferase		1.2889	0.117422	0.0786504	0.81675	0.901588	0.397376	0.273788	0.267023		0.848913	0.00880122		1.3145	0.260161		1.2836	0.605848		1.0513	0.242347		1.59587	0.371179
>generic|carvalho36692|PsCam052307_1_AA	Q9SYG1;frv2_127602	PsCam052307_1_AA 17.4 kDa class III heat shock protein OS=Arabidopsis thaliana GN=HSP17.4B PE=2 SV=1 (sp	stress.abiotic.heat		0.993637	0.950262	0.323186	1.69473	0.748011	0.359939	0.088577	0.779826		0.662297	0.317138		1.2009	0.204551		0.568631	0.607601		1.30166	0.642015		1.2382	0.021663
>generic|frv2_95844|p.sativum_wa1_contig02894_3	frv2_95844;P23958	p.sativum_wa1_contig02894_3 Putative aquaporin TIP-type alpha n=1 Tax=Glycine soja RepID=A0A0B2NX44_GLYSO (UniRef100_A0A0B2NX44 icov:96% qcovs:89.02% e-val:1e-163)	transport.Major Intrinsic Proteins.TIP		0.795033	0.772619	0.283176	5.57124	0.335363	0.27944	0.118431	0.96497		0.493099	0.226042		1.34088	0.722932		1.87695	0.610335		0.409353	0.664226		0.350339	0.58948
>generic|frv2_104163|p.sativum_wa1_contig12237_5	frv2_104163;frv2_50185;frv2_82106;Q0JM17;frv2_18029;Q9LFN6	p.sativum_wa1_contig12237_5 PREDICTED: DEAD-box ATP-dependent RNA helicase 56-like isoform X2 n=1 Tax=Cicer arietinum RepID=UPI00032AD385 (UniRef100_UPI00032AD385 icov:97% qcovs:96.96% e-val:0)	DNA.synthesis/chromatin structure		1.43521	0.135166	0.0844501	0.415868	0.470147	0.302738	0.896712	0.741939		1.09292	0.6906		1.01608	0.950856		1.26293	0.612914		1.32154	0.896566		2.21712	0.476452
>generic|frv2_81016|Pisum_sativum_v2_Contig4486_2	frv2_81016;frv2_47074;Q9SG80	Pisum_sativum_v2_Contig4486_2 Alpha-L-arabinofuranosidase n=2 Tax=Medicago truncatula RepID=D7RIC7_MEDTR (UniRef100_D7RIC7 icov:89% qcovs:89.06% e-val:0)	cell wall.degradation.mannan-xylose-arabinose-fucose		0.981027	0.80566	0.289535	0.605719	0.178328	0.220351	0.45027	0.992063		0.829061	0.0288309		0.946334	0.365666		0.794267	0.613212		0.278768	0.632044		0.308553	0.816253
>generic|frv2_51862|franssen_32095_6	frv2_51862	franssen_32095_6 Thioredoxin-like protein n=1 Tax=Medicago truncatula RepID=G7J1S6_MEDTR (UniRef100_G7J1S6 icov:99% qcovs:86.36% e-val:2e-78)	not assigned.unknown		0.997109	0.959951	0.325759	1.90582	0.768436	0.365994	0.972927	0.611449		0.7753	0.156826		0.899924	0.50292		1.28105	0.618594		0.726382	0.464376		0.954164	0.0820114		X
>generic|carvalho6188|PsCam000801_1_AA	Q9C827;frv2_112238;frv2_102341	PsCam000801_1_AA Coatomer subunit beta-2 OS=Arabidopsis thaliana GN=At1g52360 PE=2 SV=1 (sp	cell.vesicle transport		0.413112	0.0934614	0.0675811	3.77327	0.197828	0.228319	0.363467	0.135719		0.908734	0.477001		1.54627	0.242261		1.67362	0.629937		0.861875	0.167413		0.609347	0.270313
>generic|frv2_82397|Pisum_sativum_v2_Contig5173_2	frv2_82397	Pisum_sativum_v2_Contig5173_2 Protein TOC75, chloroplastic n=1 Tax=Pisum sativum RepID=TOC75_PEA (UniRef100_Q43715 icov:100% qcovs:99.79% e-val:0)	protein.targeting.chloroplast		0.959708	0.832086	0.295783	1.36497	0.222986	0.238173	0.63439	0.140383		1.70886	0.0573472		1.03523	0.883426		0.672013	0.630946		0.621805	0.461581		0.944212	0.0982436		X
>generic|frv2_113483|p.sativum_wa1_contig20246_4	frv2_113483;frv2_90728	p.sativum_wa1_contig20246_4 DEAD box RNA helicase n=1 Tax=Pisum sativum RepID=Q8H1A5_PEA (UniRef100_Q8H1A5 icov:99% qcovs:100% e-val:0)	protein.synthesis.initiation		1.19801	0.0517085	0.0469743	0.654257	0.22487	0.238173	0.924931	0.0615695		0.915911	0.615417		1.09181	0.135406		1.17478	0.635443		1.46199	0.923679		1.21392	0.359436
>generic|frv2_99694|p.sativum_wa1_contig07888_6	frv2_99694;frv2_77004;frv2_99696	p.sativum_wa1_contig07888_6 Acylamino-acid-releasing enzyme-like protein, putative n=2 Tax=Medicago truncatula RepID=G7JWI6_MEDTR (UniRef100_G7JWI6 icov:99% qcovs:85.35% e-val:0)	protein.degradation		0.8139	0.174222	0.0982473	0.244614	0.160171	0.207172	13.2594	0.293014		1.38914	0.00527275		1.15221	0.0626857		0.811337	0.636192		1.81683	0.564724		9.69148	0.369769
>generic|frv2_95682|p.sativum_wa1_contig02548_5	frv2_95682	p.sativum_wa1_contig02548_5 PREDICTED: putative lactoylglutathione lyase-like isoform X1 n=2 Tax=Cicer arietinum RepID=UPI00032AA3F0 (UniRef100_UPI00032AA3F0 icov:100% qcovs:89.12% e-val:0)	Biodegradation of Xenobiotics.lactoylglutathione lyase		2.05418	0.373901	0.168928	3.07106	0.180382	0.220351	0.610994	0.284921		1	0.373901		0.667398	0.193819		0.710242	0.636769		3.56794	0.232843		6.29851	0.441349		X
>generic|carvalho11578|PsCam010011_1_AA	Q9AYP4;frv2_95513;frv2_47633;frv2_75191;frv2_47503;frv2_100559;frv2_3754;frv2_3759	PsCam010011_1_AA 40S ribosomal protein S10 OS=Oryza sativa subsp. japonica GN=RPS10 PE=2 SV=2 (sp	protein.synthesis.ribosomal protein.eukaryotic.40S subunit.S10		1.01803	0.798716	0.289349	0.382814	0.728467	0.354355	1.00218	0.142105		1.28237	0.0785733		0.972339	0.875668		1.13765	0.637005		0.466547	0.148391		0.54852	0.144655
>generic|frv2_47487|franssen_29117_3	frv2_47487;frv2_116733;O80934	franssen_29117_3 NAD(P)-binding rossmann-fold protein n=1 Tax=Medicago truncatula RepID=I3TAJ6_MEDTR (UniRef100_I3TAJ6 icov:95% qcovs:84.04% e-val:0)	protein.degradation		1.19282	0.161518	0.0926155	0.583767	0.0890765	0.149389	0.82045	0.0444226		1.01749	0.0299248		1.03037	0.881002		0.879615	0.641154		0.451912	0.392406		2.81018	0.829424
>generic|frv2_46997|franssen_28810_1	frv2_46997;frv2_85416	franssen_28810_1 Guanine nucleotide-binding protein beta subunit-like protein n=1 Tax=Medicago truncatula RepID=G7LD98_MEDTR (UniRef100_G7LD98 icov:97% qcovs:96.31% e-val:0)	protein.postranslational modification		0.900537	0.338375	0.157279	1.01707	0.815295	0.376643	0.423174	0.739953		0.827445	0.625913		1.22545	0.0610623		1.21489	0.644719		0.718008	0.530927		1.78464	0.403449
>generic|frv2_80303|Pisum_sativum_v2_Contig4118_6	frv2_80303	Pisum_sativum_v2_Contig4118_6 PREDICTED: probable serine protease EDA2-like n=1 Tax=Cicer arietinum RepID=UPI00032A7357 (UniRef100_UPI00032A7357 icov:97% qcovs:88.33% e-val:0)	protein.degradation.serine protease		0.920628	0.623491	0.243036	1.17042	0.932175	0.405004	1.17929	0.459651		1.95926	0.645438		0.956379	0.729549		0.865587	0.645286		1.29393	0.0216605		3.00173	0.0403244		X
>generic|frv2_112859|p.sativum_wa1_contig19693_4	frv2_112859;frv2_44997	p.sativum_wa1_contig19693_4 Argininosuccinate synthase n=1 Tax=Medicago truncatula RepID=G7JLG0_MEDTR (UniRef100_G7JLG0 icov:98% qcovs:92.68% e-val:0)	amino acid metabolism.synthesis.glutamate family.arginine.arginosuccinate synthase		0.95861	0.614206	0.241258	2.2091	0.458158	0.302738	1.46479	0.261928		0.969545	0.000596636		1.04681	0.31737		1.21103	0.645601		1.45569	0.783198		1.30381	0.0949659
>generic|frv2_111169|p.sativum_wa1_contig18110_5	frv2_111169	p.sativum_wa1_contig18110_5 Threonyl-tRNA synthetase/threonine-tRNA ligase, putative n=1 Tax=Medicago truncatula RepID=G7K2Q8_MEDTR (UniRef100_G7K2Q8 icov:99% qcovs:90.3% e-val:0)	protein.aa activation.threonine-tRNA ligase		1.0968	0.534601	0.218086	1.28665	0.705306	0.34764	0.529174	0.642904		1.39453	0.0810096		0.910732	0.652084		0.751015	0.645998		1.44896	0.250827		1.94351	0.20536		X
>generic|frv2_78133|Pisum_sativum_v2_Contig2892_3	frv2_78133;frv2_102551	Pisum_sativum_v2_Contig2892_3 Sulfite reductase [ferredoxin], chloroplastic n=1 Tax=Pisum sativum RepID=SIR_PEA (UniRef100_Q75NZ0 icov:96% qcovs:99.42% e-val:0)	S-assimilation.sulfite redox		0.814154	0.152046	0.0900454	0.0194762	0.69649	0.344163	0.423658	0.573845		0.64141	0.392255		1.06493	0.164457		0.77314	0.646047		0.342315	0.134977		0.494144	0.228101
>generic|frv2_81292|Pisum_sativum_v2_Contig4624_3	frv2_81292;frv2_57286	Pisum_sativum_v2_Contig4624_3 Glycoside hydrolase family 3 protein n=1 Tax=Medicago truncatula RepID=G7J6L9_MEDTR (UniRef100_G7J6L9 icov:99% qcovs:94.54% e-val:0)	cell wall.degradation.cellulases and beta -1,4-glucanases		1.09848	0.387074	0.173095	1.6787	0.399016	0.295081	0.629849	0.00984643		1.50026	0.00163649		1.3386	0.0842873		0.745963	0.648376		2.11682	0.598502		4.12953	0.420273
>generic|carvalho6138|PsCam000725_1_AA	Q9ZV36;frv2_112679	PsCam000725_1_AA UDP-glucuronic acid decarboxylase 6 OS=Arabidopsis thaliana GN=UXS6 PE=2 SV=1 (sp	cell wall.precursor synthesis.UXS		1.11232	0.207694	0.110183	1.54649	0.393714	0.293788	1.22665	0.586612		0.864082	0.0725		1.08229	0.490441		1.22817	0.650086		1.5556	0.653056		1.36308	0.107036
>generic|carvalho40737|PsCam058366_1_AA	P09800	PsCam058366_1_AA Legumin B OS=Gossypium hirsutum GN=LEGB PE=2 SV=1 (sp	development.storage proteins		1.09605	0.122438	0.0799158	0.0817185	0.628115	0.338541	0.376316	0.283762		0.788613	0.502769		1.19315	0.202822		1.10537	0.653105		1.22451	0.30839		0.309368	0.314763		X
>generic|frv2_111714|p.sativum_wa1_contig18645_4	frv2_111714;Q9LV21;frv2_52973	p.sativum_wa1_contig18645_4 PREDICTED: T-complex protein 1 subunit delta-like n=1 Tax=Cicer arietinum RepID=UPI00032A9A4F (UniRef100_UPI00032A9A4F icov:97% qcovs:96.6% e-val:0)	protein.folding		0.917234	0.154257	0.090481	1.52686	0.723396	0.353475	0.4072	0.581441		1.06004	0.0241295		1.0613	0.845236		0.820843	0.654354		3.21487	0.853604		2.2265	0.454597
>generic|frv2_83656|Pisum_sativum_v2_Contig5801_3	frv2_83656;frv2_47429;Q9FSF0	Pisum_sativum_v2_Contig5801_3 Malate dehydrogenase n=1 Tax=Medicago truncatula RepID=A0A072VMC4_MEDTR (UniRef100_A0A072VMC4 icov:99% qcovs:96.08% e-val:0)	TCA / org transformation.other organic acid transformatons.cyt MDH		1.24225	0.0633881	0.0534813	1.19343	0.370459	0.286797	0.684829	0.198325		0.692436	0.417281		1.00399	0.978423		0.985642	0.656546		1.16108	0.540199		0.803839	0.55658
>generic|carvalho12729|PsCam011663_1_AA	Q8VZH2;frv2_112360	PsCam011663_1_AA Aminopeptidase M1 OS=Arabidopsis thaliana GN=APM1 PE=1 SV=1 (sp	protein.degradation		0.738275	0.0941069	0.0677685	0.844154	0.248857	0.249357	0.35611	0.205453		0.707334	0.0215003		0.965801	0.652716		1.23354	0.65707		0.636069	0.0354555		1.96133	0.0281718
>generic|carvalho29818|PsCam042449_1_AA	P93736;frv2_81026;frv2_50326	PsCam042449_1_AA Valine--tRNA ligase, mitochondrial 1 OS=Arabidopsis thaliana GN=TWN2 PE=2 SV=2 (sp	protein.aa activation.valine-tRNA ligase		1.05379	0.743458	0.275782	0.212502	0.370765	0.286797	0.204618	0.44815		0.564596	0.128599		1.09194	0.449288		0.58586	0.659139		1.04859	0.849437		2.03356	0.223465
>generic|frv2_87973|Pisum_sativum_v2_Contig7959_2	frv2_87973	Pisum_sativum_v2_Contig7959_2 Heat shock cognate 70 kDa protein n=1 Tax=Medicago truncatula RepID=A0A072UL44_MEDTR (UniRef100_A0A072UL44 icov:99% qcovs:97.69% e-val:0)	stress.abiotic.heat		1.15846	0.12709	0.0810413	0.838767	0.80995	0.376643	0.483043	0.846482		0.848745	0.0119957		1.17186	0.294637		0.901884	0.65931		1.06627	0.96118		1.36961	0.278359		X
>generic|frv2_60219|franssen_37412_5	frv2_60219;frv2_81508	franssen_37412_5 Pyruvate decarboxylase 1 n=1 Tax=Pisum sativum RepID=PDC1_PEA (UniRef100_P51850 icov:95% qcovs:97.53% e-val:0)	fermentation.PDC		0.930807	0.165447	0.0941642	2.05752	0.262362	0.253978	0.919733	0.401753		1.10128	1.90497e-05		1.21183	0.131123		1.25495	0.661318		1.07197	0.0917579		1.8137	0.0347057
>generic|frv2_103417|p.sativum_wa1_contig11575_5	frv2_103417	p.sativum_wa1_contig11575_5 LegA class n=1 Tax=Pisum sativum RepID=Q9T0P5_PEA (UniRef100_Q9T0P5 icov:93% qcovs:91.04% e-val:0)	development.storage proteins		0.78454	0.106462	0.0740704	1.71088	0.805123	0.375338	1.71807	0.813296		1.14046	0.10966		0.905323	0.396992		0.725352	0.663533		1.03568	0.161958		3.20019	0.0926574		X
>generic|frv2_81168|Pisum_sativum_v2_Contig4562_1	frv2_81168	Pisum_sativum_v2_Contig4562_1 PREDICTED: arginine--tRNA ligase, cytoplasmic-like n=1 Tax=Cicer arietinum RepID=UPI00032ACE1F (UniRef100_UPI00032ACE1F icov:98% qcovs:90.22% e-val:0)	protein.aa activation.arginine-tRNA ligase		0.76396	0.592237	0.23624	9.83544	0.301491	0.272049	0.181215	0.326647		1.0341	0.227779		0.953495	0.732174		1.44749	0.6772		2.44383	0.0342711		2.07706	0.538435		X
>generic|frv2_87479|Pisum_sativum_v2_Contig7713_2	frv2_87479	Pisum_sativum_v2_Contig7713_2 Major intrinsic protein (MIP) family transporter n=1 Tax=Medicago truncatula RepID=A0A072VLM9_MEDTR (UniRef100_A0A072VLM9 icov:99% qcovs:85.33% e-val:1e-158)	transport.Major Intrinsic Proteins.TIP		0.986768	0.939263	0.321536	3.33619	0.457526	0.302738	0.3217	0.762418		0.229245	0.00244239		1.31023	0.370666		0.668881	0.679916		0.634571	0.674132		0.555349	0.595478		X
>generic|frv2_119901|p.sativum_wa1_contig25332_6	frv2_119901	p.sativum_wa1_contig25332_6 Annexin n=1 Tax=Medicago truncatula RepID=G7IW11_MEDTR (UniRef100_G7IW11 icov:93% qcovs:92.59% e-val:0)	cell.organisation		1.35591	0.183502	0.101227	2.64763	0.656052	0.34243	0.511051	0.442047		1.21493	0.141659		1.23665	0.707691		0.603565	0.683995		1.73021	0.515665		1.47622	0.936072		X
>generic|frv2_102446|p.sativum_wa1_contig10667_2	frv2_102446	p.sativum_wa1_contig10667_2 PREDICTED: uridine 5-monophosphate synthase-like n=1 Tax=Cicer arietinum RepID=UPI00032A6CBB (UniRef100_UPI00032A6CBB icov:97% qcovs:92.21% e-val:4e-158)	nucleotide metabolism.synthesis.pyrimidine.orotate phosphoribosyltransferase		1.00182	0.993215	0.33336	2.33401	0.533079	0.316958	0.400575	0.495317		2.41657	0.324573		0.907788	0.642348		1.42222	0.685513		3.11217	0.0025937		0.906941	0.278383		X
>generic|frv2_111736|p.sativum_wa1_contig18663_4	frv2_111736;Q9M084;frv2_55173	p.sativum_wa1_contig18663_4 PREDICTED: aspartate--tRNA ligase, cytoplasmic-like n=1 Tax=Cicer arietinum RepID=UPI00032A69F7 (UniRef100_UPI00032A69F7 icov:96% qcovs:93.3% e-val:0)	protein.aa activation.aspartate-tRNA ligase		1.002	0.988872	0.33336	1.5078	0.492788	0.305258	1.65038	0.486541		0.922824	0.831837		1.2908	0.290989		1.31598	0.687198		0.935873	0.239035		3.45224	0.223504
>generic|carvalho33873|PsCam048777_1_AA	Q9M8D3	PsCam048777_1_AA Probable phosphoribosylformylglycinamidine synthase, chloroplastic/mitochondrial OS=Arabidopsis thaliana GN=At1g74260 PE=2 SV=3 (sp	nucleotide metabolism.synthesis.purine.FGAR amidotransferase		0.641034	0.247766	0.122593	2.683	0.161049	0.207629	0.297212	0.125975		0.213711	0.475236		1.15638	0.197523		1.3346	0.687813		2.1155	0.189685		0.217966	0.496645		X
>generic|frv2_88118|Pisum_sativum_v2_Contig8034_1	frv2_88118	Pisum_sativum_v2_Contig8034_1 Uncharacterized protein n=1 Tax=Medicago truncatula RepID=G7I9H1_MEDTR (UniRef100_G7I9H1 icov:90% qcovs:91.52% e-val:9e-110)	hormone metabolism.ethylene.induced-regulated-responsive-activated		1.30141	0.0562785	0.049135	0.235564	0.646688	0.339012	0.331468	0.771171		1.27624	0.0598029		0.845066	0.251101		0.664595	0.691255		3.49407	0.635049		6.79937	0.491788		X
>generic|frv2_113499|p.sativum_wa1_contig20264_4	frv2_113499;Q9SLA8	p.sativum_wa1_contig20264_4 Enoyl-acyl-carrier reductase n=1 Tax=Medicago truncatula RepID=A0A072TZC5_MEDTR (UniRef100_A0A072TZC5 icov:99% qcovs:88.55% e-val:0)	lipid metabolism.FA synthesis and FA elongation.enoyl ACP reductase		1.18182	0.114225	0.0773532	2.48981	0.239676	0.24833	0.313077	0.176331		1.60154	0.136123		1.16208	0.519026		0.766073	0.700781		1.16521	0.744873		1.56802	0.623499
>generic|frv2_80866|Pisum_sativum_v2_Contig4412_3	frv2_80866;frv2_48664	Pisum_sativum_v2_Contig4412_3 Topoisomerase-like protein n=2 Tax=Medicago truncatula RepID=G7JNQ7_MEDTR (UniRef100_G7JNQ7 icov:100% qcovs:93.77% e-val:0)	DNA.unspecified		0.575015	0.143657	0.0870173	1.80196	0.694609	0.344163	0.431312	0.209918		0.690699	0.00069338		1.21452	0.20736		0.787258	0.722594		3.64546	0.356736		2.40554	0.119375
>generic|frv2_75125|Pisum_sativum_v2_Contig871_5	frv2_75125;frv2_75120;frv2_75118	Pisum_sativum_v2_Contig871_5 PREDICTED: 40S ribosomal protein S5-like n=1 Tax=Cicer arietinum RepID=UPI00032A9D03 (UniRef100_UPI00032A9D03 icov:91% qcovs:89.3% e-val:2e-116)	protein.synthesis.ribosomal protein.eukaryotic.40S subunit.S5		1.02915	0.837083	0.297215	0.462082	0.364343	0.286797	0.578955	0.117751		1.13564	0.0822786		1.00875	0.926595		0.860038	0.725845		1.24815	0.393302		0.902453	0.0152412
>generic|frv2_113691|p.sativum_wa1_contig20430_4	frv2_113691;O23894	p.sativum_wa1_contig20430_4 26S proteasome regulatory particle triple-A ATPase protein n=1 Tax=Medicago truncatula RepID=G7I8P7_MEDTR (UniRef100_G7I8P7 icov:98% qcovs:99.53% e-val:0)	protein.degradation.ubiquitin.proteasom		1.11184	0.204418	0.108871	0.885164	0.214914	0.235363	0.76744	0.287003		0.271869	0.10952		0.957501	0.507984		1.13976	0.729115		0.517366	0.807766		1.25457	0.175459
>generic|frv2_50386|franssen_31075_4	frv2_50386;frv2_60334;frv2_117266;Q38884;frv2_85463	franssen_31075_4 PREDICTED: eukaryotic translation initiation factor 3 subunit I-like n=1 Tax=Cicer arietinum RepID=UPI00032ABCF9 (UniRef100_UPI00032ABCF9 icov:97% qcovs:96.01% e-val:0)	hormone metabolism.brassinosteroid.signal transduction.other		1.08826	0.528018	0.215975	1.52845	0.672401	0.34309	0.597775	0.617149		1.87906	0.542994		0.784985	0.318545		0.760456	0.729929		2.63976	0.490546		2.08113	0.61924
>generic|frv2_53025|franssen_32900_4	frv2_53025;frv2_48315;Q9AT35;frv2_87758	franssen_32900_4 60S ribosomal protein L23a-2 n=1 Tax=Medicago truncatula RepID=B7FGR0_MEDTR (UniRef100_B7FGR0 icov:92% qcovs:96.75% e-val:1e-98)	protein.synthesis.ribosomal protein.eukaryotic.60S subunit.L23A		0.886741	0.141577	0.0866901	1.84364	0.958724	0.414036	0.887726	0.111843		1.13329	0.0643933		0.93706	0.651539		0.804375	0.737697		1.01435	0.27202		1.34991	0.396852
>generic|frv2_80532|Pisum_sativum_v2_Contig4238_6	frv2_80532;frv2_47260;Q09751	Pisum_sativum_v2_Contig4238_6 Lactoylglutathione lyase/glyoxalase I family protein n=1 Tax=Medicago truncatula RepID=G7K3N2_MEDTR (UniRef100_G7K3N2 icov:87% qcovs:94.2% e-val:6e-90)	Biodegradation of Xenobiotics.lactoylglutathione lyase		0.915135	0.239524	0.119822	0.0796139	0.291036	0.27021	0.575382	0.311802		0.95653	0.174443		1.19304	0.0865866		0.801002	0.743066		1.41473	0.398343		1.89624	0.304131
>generic|frv2_80585|Pisum_sativum_v2_Contig4268_1	frv2_80585	Pisum_sativum_v2_Contig4268_1 PREDICTED: MFP1 attachment factor 1-like n=1 Tax=Cicer arietinum RepID=UPI00032ACD9B (UniRef100_UPI00032ACD9B icov:92% qcovs:81.1% e-val:2e-76)	cell.organisation		0.97587	0.758296	0.28027	1.3141	0.806368	0.375476	0.400929	0.59357		0.884213	0.142232		0.927995	0.792568		0.746207	0.74487		1.29036	0.929372		2.88772	0.60892		X
>generic|carvalho31757|PsCam045525_1_AA	P25795;frv2_82104	PsCam045525_1_AA Aldehyde dehydrogenase family 7 member A1 OS=Pisum sativum PE=1 SV=3 (sp	fermentation.aldehyde dehydrogenase		0.954601	0.0990529	0.070177	0.701115	0.0711554	0.129782	0.370343	0.0115838		0.772932	0.00637989		0.834887	0.190017		0.843729	0.745039		0.666741	0.943374		2.26003	0.814601
>generic|frv2_46640|franssen_28604_2	frv2_46640;frv2_83676	franssen_28604_2 PREDICTED: ATPase ASNA1 homolog n=1 Tax=Cicer arietinum RepID=UPI00032A7C01 (UniRef100_UPI00032A7C01 icov:90% qcovs:93.08% e-val:8e-175)	transport.unspecified anions.arsenite-transporting ATPase		0.934572	0.630668	0.244303	0.700393	0.601365	0.334088	1.8097	0.560403		1.06504	0.742838		1.16459	0.386112		0.841887	0.753155		1.07912	0.241199		0.630086	0.8291
>generic|frv2_47176|franssen_28918_3	frv2_47176;frv2_80843	franssen_28918_3 Heat shock protein 81-2 n=1 Tax=Medicago truncatula RepID=G7I7Q4_MEDTR (UniRef100_G7I7Q4 icov:99% qcovs:90.35% e-val:0)	stress.abiotic.heat		1.04449	0.764999	0.281391	1.04552	0.975013	0.417192	1.90672	0.0790254		1.00749	0.00123616		1.05159	0.798136		1.14852	0.753744		1.52727	0.0973118		2.25892	0.0723368
>generic|frv2_81686|Pisum_sativum_v2_Contig4819_4	frv2_81686	Pisum_sativum_v2_Contig4819_4 Pyruvate decarboxylase 1 n=1 Tax=Lotus corniculatus RepID=Q84V95_LOTCO (UniRef100_Q84V95 icov:99% qcovs:92.9% e-val:0)	fermentation.PDC		0.67801	0.0961136	0.0687295	1.43809	0.354313	0.286797	2.67943	0.432999		0.95125	0.00479471		0.85121	0.443282		0.764163	0.75578		1.22121	0.104224		1.16248	0.068586		X
>generic|frv2_122279|p.sativum_wa1_contig26969_4	frv2_122279	p.sativum_wa1_contig26969_4 ATP-dependent chaperone ClpB n=1 Tax=Medicago truncatula RepID=A0A072UQA8_MEDTR (UniRef100_A0A072UQA8 icov:100% qcovs:97.48% e-val:0)	stress.abiotic.heat		0.871946	0.189114	0.103413	0.0243844	0.482893	0.30434	1.05491	0.613284		0.986976	0.605426		0.979034	0.855384		1.10387	0.756435		0.716226	0.964101		0.69796	0.651082		X
>generic|frv2_119187|p.sativum_wa1_contig24781_5	frv2_119187;Q9SBA5;frv2_52916	p.sativum_wa1_contig24781_5 Inositol-tetrakisphosphate 1-kinase n=1 Tax=Medicago truncatula RepID=A0A072UR73_MEDTR (UniRef100_A0A072UR73 icov:97% qcovs:80.39% e-val:1e-178)	signalling.phosphinositides.inositol-1,3,4-trisphosphate 5/6-kinase		1.20183	0.102384	0.0718734	0.559944	0.90233	0.397376	0.855412	0.00391536		1.18052	0.00268397		0.946574	0.515895		0.760103	0.756693		1.41397	0.381413		1.41582	0.110036
>generic|frv2_15699|franssen_9235_3	frv2_15699;frv2_81413	franssen_9235_3 D-3-phosphoglycerate dehydrogenase family protein n=1 Tax=Medicago truncatula RepID=A0A072VR00_MEDTR (UniRef100_A0A072VR00 icov:99% qcovs:91.67% e-val:0)	amino acid metabolism.synthesis.serine-glycine-cysteine group.serine.phosphoglycerate dehydrogenase		1.60311	0.060829	0.0519794	0.430811	0.258655	0.253688	3.23429	0.0466586		0.801306	0.784577		0.896658	0.447703		0.769753	0.75838		1.329	0.580448		2.01532	0.123316
>generic|frv2_80099|Pisum_sativum_v2_Contig4011_4	frv2_80099;frv2_54748	Pisum_sativum_v2_Contig4011_4 Endo-1,3-1,4-beta-D-glucanase-like protein n=1 Tax=Medicago truncatula RepID=A0A072UQU5_MEDTR (UniRef100_A0A072UQU5 icov:96% qcovs:87.39% e-val:5e-139)	misc.misc2		0.900301	0.178077	0.0996658	1.09635	0.509472	0.307869	0.546549	0.317057		1.15217	0.120046		0.967414	0.819885		1.19526	0.76089		0.488038	0.233543		1.13134	0.168158
>generic|frv2_76547|Pisum_sativum_v2_Contig1924_6	frv2_76547;Q9SWB6;frv2_76549;frv2_59219;frv2_129771	Pisum_sativum_v2_Contig1924_6 Seed maturation PM36-like protein n=1 Tax=Medicago truncatula RepID=G7JMU3_MEDTR (UniRef100_G7JMU3 icov:93% qcovs:79.55% e-val:7e-128)	not assigned.no ontology		0.803316	0.060042	0.0517393	0.554821	0.0579215	0.11637	1.32215	0.0391667		1.19832	0.0025329		1.00107	0.994655		0.838411	0.774618		0.536451	0.988057		0.833155	0.14217
>generic|frv2_121182|p.sativum_wa1_contig26227_4	frv2_121182	p.sativum_wa1_contig26227_4 Proteasome subunit beta type n=2 Tax=Medicago truncatula RepID=I3S0S1_MEDTR (UniRef100_I3S0S1 icov:91% qcovs:98.04% e-val:7e-146)	protein.degradation.ubiquitin.proteasom		1.05045	0.858826	0.302484	0.916385	0.155357	0.202267	0.995295	0.447278		1.06529	0.0262919		0.931246	0.602043		0.766534	0.779541		0.702279	0.575604		3.48144	0.449129		X
>generic|frv2_50855|franssen_31402_3	frv2_50855;frv2_84566;frv2_7856	franssen_31402_3 PREDICTED: basic 7S globulin 2-like n=1 Tax=Cicer arietinum RepID=UPI00032AB681 (UniRef100_UPI00032AB681 icov:99% qcovs:82.65% e-val:0)	protein.degradation.aspartate protease		1.6236	0.0723631	0.0587274	2.90565	0.576314	0.328922	0.0458978	0.433519		0.879251	0.00114501		1.03858	0.886538		1.26879	0.78275		0.745933	0.0615382		0.301932	0.196813
>generic|frv2_46438|franssen_28486_3	frv2_46438;frv2_46435;frv2_46432;P42798;frv2_95780;frv2_95777;frv2_2033	franssen_28486_3 40S ribosomal protein S15a-1 n=11 Tax=Mesangiospermae RepID=A0A0B2REV7_GLYSO (UniRef100_A0A0B2REV7 icov:97% qcovs:95.07% e-val:1e-92)	protein.synthesis.ribosomal protein.eukaryotic.40S subunit.S15A		1.08579	0.0651395	0.0543015	1.31942	0.609163	0.336265	3.00624	0.622745		0.916295	0.00160093		0.892531	0.359545		0.934502	0.783832		0.917647	0.0126366		1.29582	0.110441
>generic|frv2_129158|p.sativum_wa1_contig31371_4	frv2_129158	p.sativum_wa1_contig31371_4 Seed linoleate 9S-lipoxygenase-2 n=1 Tax=Pisum sativum RepID=LOX2_PEA (UniRef100_P14856 icov:99% qcovs:100% e-val:3e-158)	hormone metabolism.jasmonate.synthesis-degradation.lipoxygenase		1.0009	0.996029	0.333939	0.839382	0.0994998	0.157943	0.79134	0.0822153		0.809895	0.433308		0.895045	0.40909		1.21466	0.785524		0.623676	0.00400545		0.370903	0.0860486		X
>generic|carvalho18185|PsCam023970_1_AA	Q7ZZ25	PsCam023970_1_AA ATPase family AAA domain-containing protein 1-A OS=Danio rerio GN=atad1a PE=2 SV=2 (sp	protein.degradation.AAA type		1.08458	0.518696	0.213299	1.0528	0.823193	0.377034	0.345492	0.991414		1.14235	0.423409		1.12466	0.280503		0.772012	0.78927		1.09587	0.557749		0.70456	0.464488		X
>generic|frv2_50516|franssen_31171_3	frv2_50516;frv2_83652	franssen_31171_3 Succinyl-CoA ligase [ADP-forming] subunit alpha-2 n=1 Tax=Medicago truncatula RepID=G7KKB4_MEDTR (UniRef100_G7KKB4 icov:91% qcovs:94.79% e-val:0)	TCA / org transformation.TCA.succinyl-CoA ligase		0.870395	0.641768	0.247691	2.67993	0.415296	0.298912	0.310792	0.284541		0.830333	0.375912		1.04187	0.619959		1.14374	0.789673		3.05698	0.0149519		1.94903	0.249564
>generic|carvalho5599|PsCam000015_1_AA	Q02909;frv2_111415	PsCam000015_1_AA Phosphoenolpyruvate carboxylase, housekeeping isozyme OS=Glycine max GN=PPC16 PE=2 SV=1 (sp	glycolysis.cytosolic branch.phospho-enol-pyruvate carboxylase (PEPC)		1.03434	0.705492	0.265356	0.348931	0.600165	0.334088	0.205359	0.0911714		1.03364	0.119387		0.989411	0.923215		1.12052	0.790915		0.547139	0.737537		1.28607	0.497987
>generic|frv2_88093|Pisum_sativum_v2_Contig8019_5	frv2_88093;frv2_4712	Pisum_sativum_v2_Contig8019_5 60S ribosomal L28-like protein n=1 Tax=Medicago truncatula RepID=G7IUL4_MEDTR (UniRef100_G7IUL4 icov:98% qcovs:95.8% e-val:6e-95)	protein.synthesis.ribosomal protein.eukaryotic.60S subunit.L28		1.0154	0.80472	0.289535	0.312049	0.16914	0.215255	0.277657	0.702236		0.856409	0.000161017		0.913153	0.721675		0.855547	0.794296		0.270791	0.0892573		0.626836	0.18743
>generic|carvalho40949|PsCam058666_1_AA	Q93ZT6	PsCam058666_1_AA Eukaryotic translation initiation factor isoform 4G-1 OS=Arabidopsis thaliana GN=EIF(ISO)4G1 PE=1 SV=1 (sp	protein.synthesis.initiation		1.17316	0.0524159	0.0469743	0.801647	0.866355	0.390099	0.205098	0.500793		1.19938	0.165399		0.834952	0.389733		0.803303	0.796249		1.39975	0.290615		4.35842	0.248316		X
>generic|frv2_82191|Pisum_sativum_v2_Contig5071_4	frv2_82191;Q940M2	Pisum_sativum_v2_Contig5071_4 PREDICTED: alanine--glyoxylate aminotransferase 2 homolog 1, mitochondrial-like n=1 Tax=Cicer arietinum RepID=UPI00032A7487 (UniRef100_UPI00032A7487 icov:96% qcovs:90.06% e-val:0)	amino acid metabolism.synthesis.central amino acid metabolism.alanine.alanine-glyoxylate aminotransferase		1.32979	0.378094	0.170321	3.22242	0.213019	0.234851	0.256318	0.224606		0.536907	0.780392		1.26103	0.461141		0.8118	0.798991		0.440474	0.578088		1.09021	0.888947
>generic|frv2_85407|Pisum_sativum_v2_Contig6680_3	frv2_85407;O64740;frv2_48257	Pisum_sativum_v2_Contig6680_3 Uncharacterized protein n=1 Tax=Glycine max RepID=K7LA80_SOYBN (UniRef100_K7LA80 icov:100% qcovs:93.71% e-val:0)	protein.targeting.secretory pathway.plasma membrane		0.806201	0.0679017	0.0556961	0.736097	0.737101	0.355779	1.93688	0.992776		8.07536	0.711828		1.06972	0.32258		0.940234	0.800731		1.17192	0.569077		2.63987	0.143635
>generic|frv2_110900|p.sativum_wa1_contig17828_5	frv2_110900;Q42601	p.sativum_wa1_contig17828_5 PREDICTED: carbamoyl-phosphate synthase large chain-like n=1 Tax=Cicer arietinum RepID=UPI00032AADFD (UniRef100_UPI00032AADFD icov:99% qcovs:92.09% e-val:0)	nucleotide metabolism.synthesis.pyrimidine.carbamoyl phosphate synthetase		0.713242	0.721827	0.269798	3.77986	0.273974	0.261924	1.03852	0.216436		5.79959	0.745005		2.05804	0.078391		0.730473	0.802127		0.961214	0.578552		0.503913	0.657491
>generic|frv2_77058|Pisum_sativum_v2_Contig2251_4	frv2_77058;O81970;frv2_99850;O65782	Pisum_sativum_v2_Contig2251_4 Cytochrome P450 family 71 protein n=1 Tax=Medicago truncatula RepID=A0A072UTB6_MEDTR (UniRef100_A0A072UTB6 icov:99% qcovs:78.26% e-val:3e-89)	secondary metabolism.sulfur-containing.glucosinolates.synthesis.shared.CYP83B1 phenylacetaldoxime monooxygenase		1.76937	0.191602	0.104561	0.251869	0.637774	0.338541	0.422567	0.530454		0.839839	0.329601		0.953515	0.514949		0.741368	0.802465		0.968475	0.648102		1.52528	0.563866
>generic|carvalho31885|PsCam045682_1_AA	Q8BJY1	PsCam045682_1_AA 26S proteasome non-ATPase regulatory subunit 5 OS=Mus musculus GN=Psmd5 PE=1 SV=4 (sp	protein.degradation.ubiquitin.proteasom		0.508404	0.131104	0.082755	1.44083	0.435319	0.299484	0.161324	0.359632		0.387798	0.898817		0.497698	0.0976142		0.827165	0.808483		0.0461722	0.909475		2.99951	0.419317		X
>generic|frv2_48822|franssen_30001_2	frv2_48822;Q38890;frv2_82744	franssen_30001_2 Endoglucanase n=1 Tax=Medicago truncatula RepID=Q2HSS5_MEDTR (UniRef100_Q2HSS5 icov:96% qcovs:93.4% e-val:0)	cell wall.cellulose synthesis		1.23748	0.274071	0.134094	1.93085	0.248051	0.249357	2.05152	0.239536		1.09247	0.138486		1.12615	0.592771		1.11021	0.811129		1.88153	0.314046		0.970953	0.211317
>generic|frv2_56831|franssen_35329_3	frv2_56831;frv2_113106	franssen_35329_3 PREDICTED: 3-ketoacyl-CoA thiolase 2, peroxisomal-like n=1 Tax=Cicer arietinum RepID=UPI00032AC4EF (UniRef100_UPI00032AC4EF icov:96% qcovs:95.75% e-val:0)	amino acid metabolism.degradation.branched chain group.shared		1.34735	0.108962	0.0752146	1.13116	0.56977	0.327239	0.240627	0.66895		0.815813	0.710117		1.00966	0.929616		0.886539	0.811252		0.427143	0.786582		1.84146	0.44492
>generic|frv2_101252|p.sativum_wa1_contig09408_2	frv2_101252;frv2_73763;frv2_52381;frv2_78782;frv2_88140	p.sativum_wa1_contig09408_2 PREDICTED: 6-phosphofructokinase 3-like n=1 Tax=Cicer arietinum RepID=UPI00032A7945 (UniRef100_UPI00032A7945 icov:97% qcovs:82.23% e-val:0)	glycolysis.cytosolic branch.phosphofructokinase (PFK)		0.92229	0.432373	0.186963	0.511758	0.291546	0.27021	1.48819	0.283209		0.981812	0.723951		0.910807	0.566728		1.12752	0.81491		1.43459	0.0621916		2.43336	0.559363
>generic|frv2_86323|Pisum_sativum_v2_Contig7139_3	frv2_86323	Pisum_sativum_v2_Contig7139_3 Phosphoenolpyruvate carboxylase n=1 Tax=Pisum sativum RepID=CAPP_PEA (UniRef100_P51062 icov:98% qcovs:99.21% e-val:0)	glycolysis.cytosolic branch.phospho-enol-pyruvate carboxylase (PEPC)		1.02279	0.901885	0.312272	0.374482	0.334649	0.27944	0.332145	0.460655		0.579785	0.030645		1.19847	0.236687		0.84938	0.815169		0.430618	0.157364		1.22297	0.112392		X
>generic|frv2_70626|franssen_43635_143);>generic|frv2_35983|franssen_21589_4 BnaA06g21550D protein n=1 Tax=Brassica napus Rep	frv2_70626;frv2_35983;frv2_43175;frv2_72848;frv2_72637;frv2_72572;frv2_33014;frv2_72017;frv2_41913;frv2_72868;frv2_72736;frv2_42986;frv2_56977;frv2_43496;frv2_44538;frv2_44387;frv2_43714;frv2_43371;frv2_42115;frv2_72803;frv2_71220;frv2_71007;frv2_42956;frv2_42859;frv2_32519;frv2_30971;frv2_73669;frv2_73453;frv2_71436;frv2_69951;frv2_70630;frv2_70311;frv2_44253;frv2_42920;frv2_35394;frv2_34919;frv…	franssen_43635_1 BnaAnng33460D protein (Fragment) n=3 Tax=Pentapetalae RepID=A0A078JY26_BRANA (UniRef100_A0A078JY26 icov:97% qcovs:95.89% e-val:6e-43)	protein.aa activation		1.07236	0.234592	0.118456	0.192609	nan	nan	0.782319	3.11043e-05		0.946363	0.0516185		1	nan		1.13317	0.817249		1.04994	0.489196		0.73402	0.345813
>generic|frv2_112267|p.sativum_wa1_contig19158_5	frv2_112267;frv2_59831	p.sativum_wa1_contig19158_5 L-ascorbate oxidase-like protein n=1 Tax=Medicago truncatula RepID=A2Q4H7_MEDTR (UniRef100_A2Q4H7 icov:97% qcovs:92.76% e-val:0)	cell wall.pectin*esterases.PME		0.782014	0.557875	0.224594	1.7098	0.643757	0.338541	0.430168	0.576988		0.840157	0.609696		0.655473	0.0883461		1.11124	0.817372		1.77644	0.711269		1.57694	0.18377
>generic|frv2_75179|Pisum_sativum_v2_Contig911_6	frv2_75179	Pisum_sativum_v2_Contig911_6 Short-chain alcohol dehydrogenase A (Fragment) n=3 Tax=Pisum sativum RepID=Q76KV8_PEA (UniRef100_Q76KV8 icov:60% qcovs:87.74% e-val:5e-92)	misc.short chain dehydrogenase/reductase (SDR)		1	nan	nan	2.0006	0.373901	0.286797	0.277841	0.373901		0.609713	0.055234		0.741002	0.264871		1.14451	0.822132		1.09467	0.156753		2.31184	0.573529		X
>generic|frv2_79991|Pisum_sativum_v2_Contig3954_3	frv2_79991;frv2_22936;frv2_80830;frv2_123830;frv2_122513;Q9FJH0;frv2_26920	Pisum_sativum_v2_Contig3954_3 GTP-binding protein n=2 Tax=Fabeae RepID=Q08150_PEA (UniRef100_Q08150 icov:83% qcovs:100% e-val:3e-156)	signalling.G-proteins		1.02781	0.881796	0.307747	1.63377	0.281199	0.265624	3.53105	0.165229		2.75669	0.0567451		1.21534	0.426406		0.807791	0.823792		0.963065	0.846901		20.4655	0.325177
[truncated: 68 more rows]
